# Supplementary material for: Tandem imine generation/N-cyclization/C-alkylation sequence to access N-functionalized indoles featuring an aza-quaternary carbon
Source: Royal Society of Chemistry journal article supplement (doi:10.1039/d3qo00114h), 2023-01-01

# Tandem imine generation/N-cyclization/C-alkylation sequence to access N-functionalized indoles featuring an *aza*-quaternary carbon

Jun-Song Tian,<sup>a</sup> Zhi Tu,<sup>a</sup> Feng Zhou,<sup>a</sup> Jin-Sheng Yu<sup>a</sup> and Jian Zhou<sup>\*a,b</sup>

<sup>a</sup> Shanghai Engineering Research Center of Molecular Therapeutics and New Drug Development; and Shanghai Key Laboratory of Green Chemistry and Chemical Processes, School of Chemistry and Molecular Engineering, East China Normal University, 3663N Zhongshan Road, Shanghai 200062, China.

<sup>b</sup> State Key Laboratory of Organometallic Chemistry, Shanghai Institute of Organic Chemistry, Chinese Academy of Sciences, Shanghai 200032, China.

E-mail: [jzhou@chem.ecnu.edu.cn](mailto:jzhou@chem.ecnu.edu.cn)

## Supporting Information

(Part I)

| Table of Contents                                               | Page   |
|-----------------------------------------------------------------|--------|
| 1. General information                                          | 1      |
| 2. General procedure for the synthesis of starting materials    | 2      |
| 3. Condition optimization                                       | 3-8    |
| 4. General procedure for one-pot tandem sequence of isatins     | 9-23   |
| 5. General procedure for one-pot tandem sequence of keto esters | 24-31  |
| 6. Product transformation                                       | 32-36  |
| 7. X-ray crystallography data of <b>7o</b>                      | 37-42  |
| 8. References                                                   | 43     |
| 9. NMR spectra                                                  | 44-187 |

## 1. General information

Reactions were monitored by thin layer chromatography using UV light to visualize the course of reaction. Purification of reaction products was carried out by flash chromatography on silica gel. Chemical yields refer to pure isolated substances. Infrared (IR) spectra were obtained using a Nicolet Nexus 670 FT-IR spectrometer with KBr pellets in the range 4000-400  $\text{cm}^{-1}$ . Low resolution mass spectra are determined on GCMS-QP2010 (Shimadzu) or Agilent 5975C MSD. High resolution mass spectra are determined on Agilent Technologies 6224 TOF LC-MS or Agilent 6545 QTOF LC-MS.  $^1\text{H}$ ,  $^{13}\text{C}$  and  $^{19}\text{F}$  NMR spectra were obtained using a Bruker DPX-400 and Bruker DPX-300 spectrometer. Chemical shifts are reported in ppm from  $\text{CDCl}_3$  with the solvent resonance as the internal standard. The following abbreviations were used to designate chemical shift multiplicities: s = singlet, d = doublet, t = triplet, q = quartet, h = heptet, m = multiplet, br = broad.

Unless noted, all the reactions were carried out under an atmosphere of  $\text{N}_2$ . Anhydrous  $\text{CH}_2\text{Cl}_2$  and MeCN are prepared by first distillation over  $\text{P}_2\text{O}_5$  and then from  $\text{CaH}_2$ . Anhydrous THF, dioxane, and toluene are freshly distilled from sodium/benzophenone, and MeOH from Mg. Anhydrous DMSO, DMA and DMF were prepared by drying over  $\text{Na}_2\text{SO}_4$ , distillation again from  $\text{CaSO}_4$  and storing over MS 4Å.

### List of abbreviation:

| Entry | Chemical name                 | Abbreviation             |
|-------|-------------------------------|--------------------------|
| 1     | Petroleum ether               | PE                       |
| 2     | Ethyl acetate                 | EtOAc                    |
| 3     | Tetrahydrofuran               | THF                      |
| 4     | Dichloromethane               | $\text{CH}_2\text{Cl}_2$ |
| 5     | Acetonitrile                  | MeCN                     |
| 6     | Dimethylsulfoxide             | DMSO                     |
| 7     | <i>N,N</i> -dimethylacetamide | DMA                      |
| 8     | <i>N,N</i> -dimethylformamide | DMF                      |
| 9     | Methanol                      | MeOH                     |
| 10    | Toluene                       | PhMe                     |

## 2. General procedure for the synthesis of starting materials

The **4a** and **4m** are commercially available. **4b-4g**,<sup>1</sup> **4h**,<sup>2</sup> **4i**,<sup>3</sup> **4j**,<sup>4</sup> **4k**,<sup>5</sup> **4l**,<sup>2</sup> **4n**,<sup>3</sup> **5a-5g**,<sup>6</sup> **9a**,<sup>7</sup> **9b**,<sup>8</sup> **9c**,<sup>9</sup> and **9d**,<sup>7</sup> are known compounds and synthesized accordingly.

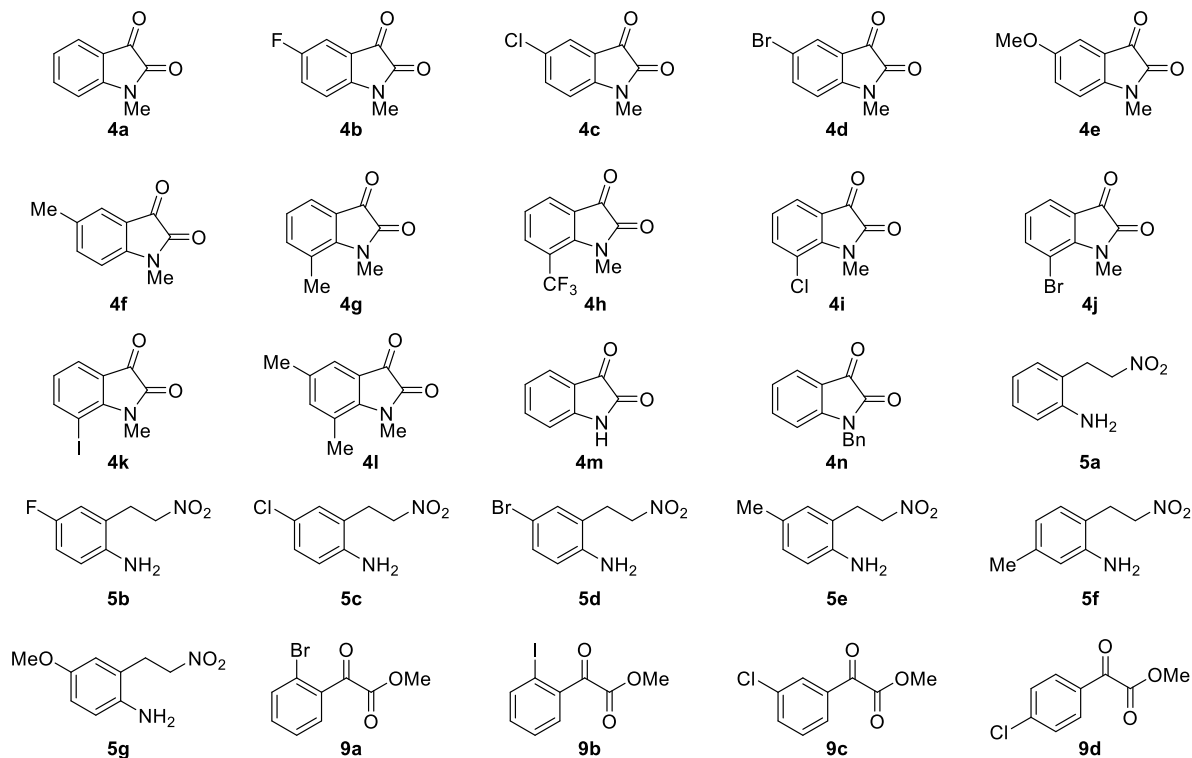

### The synthesis of 3-iodopropanenitrile.

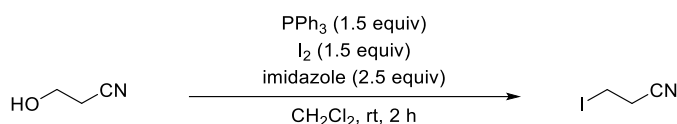

To a solution of  $\text{PPh}_3$  (7.87 g, 30.0 mmol) in dry  $\text{CH}_2\text{Cl}_2$  (90 mL) was added  $\text{I}_2$  (7.61 g, 30.0 mmol). The reaction mixture was stirred at room temperature for 10 min and imidazole (3.40 g, 50.0 mmol) was added. After stirred for another 10 min, 3-hydroxypropanenitrile (1.42 g, 20.0 mmol) was added and stirred for 2 h, and then quenched with saturated aqueous  $\text{Na}_2\text{S}_2\text{O}_3$  solution (30 mL). Then extracted the aqueous layer with  $\text{CH}_2\text{Cl}_2$  ( $3 \times 30$  mL) followed by drying of the combined organic layers over anhydrous  $\text{Na}_2\text{SO}_4$  and concentrated. The resulting residue was purified by distillation (101 °C, 23 Torr) to afford 3-iodopropanenitrile as colorless oil in 54% yield.  $^1\text{H}$  NMR (400 MHz,  $\text{CDCl}_3$ ):  $\delta$  3.28 (t,  $J = 7.2$  Hz, 2H), 3.01 (t,  $J = 7.2$  Hz, 2H);  $^{13}\text{C}$  NMR (100 MHz,  $\text{CDCl}_3$ ):  $\delta$  118.26, 22.67, 6.74. Spectral data was in agreement with that reported in literature.<sup>10</sup>

### 3. Condition optimization

The condition optimization for the one-pot tandem *N*-cyclization/*C*-benzylation reaction of isatin ketimine **1a** and BnBr **2a** was conducted as follows. To a 25-mL Schlenk tube were added **1a** (30.9 mg, 0.1 mmol), BnBr **2a** and MeOH (1.0 mL), followed by the addition of specific bases at 0 °C. The resulting mixture was stirred at specific temperature till the full consumption of **1a**, and then filtered through short silica gel and washed with CH<sub>2</sub>Cl<sub>2</sub>. The filtrate was concentrated and purified by column chromatography (PE/EtOAc, 10/1, v/v) to afford the desired product **3a**.

**Table S1** Condition optimization for the *N*-cyclization/*C*-benzylation of isatin ketimine.

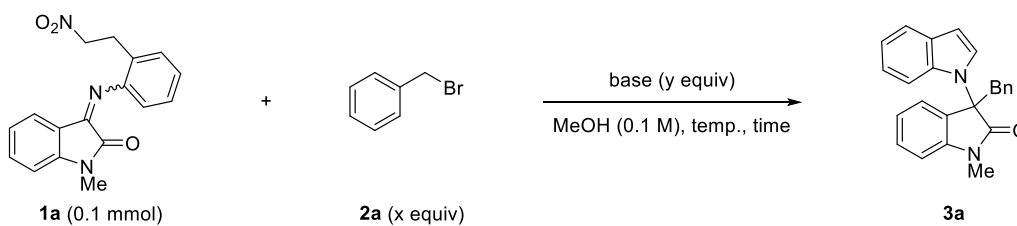

**1a** (0.1 mmol) + **2a** (x equiv)  $\xrightarrow[\text{MeOH (0.1 M), temp., time}]{\text{base (y equiv)}}$  **3a**

| entry           | BnBr (x equiv) | base (y equiv)                        | temp. (°C) | time (h) | yield (%) <sup>a</sup> |
|-----------------|----------------|---------------------------------------|------------|----------|------------------------|
| 1               | 2.0            | Na <sub>2</sub> CO <sub>3</sub> (2.0) | 0          | 24       | 29                     |
| 2               | 2.0            | K <sub>2</sub> CO <sub>3</sub> (2.0)  | 0          | 4        | 63                     |
| 3               | 2.0            | Cs <sub>2</sub> CO <sub>3</sub> (2.0) | 0          | 3        | 68                     |
| 4               | 2.0            | KOH (2.0)                             | 0          | 2        | 64                     |
| 5               | 2.0            | NaOH (2.0)                            | 0          | 2        | 61                     |
| 6               | 2.0            | K <sub>3</sub> PO <sub>4</sub> (2.0)  | 0          | 24       | 54                     |
| 7               | 2.0            | CsOH•H <sub>2</sub> O (2.0)           | 0          | 3        | 73                     |
| 8               | 2.0            | CsOH•H <sub>2</sub> O (2.0)           | 20         | 1.0      | 66                     |
| 9               | 2.0            | CsOH•H <sub>2</sub> O (2.0)           | -20        | 6        | 45                     |
| 10              | 2.0            | CsOH•H <sub>2</sub> O (1.5)           | 0          | 24       | 46                     |
| 11              | 2.0            | CsOH•H <sub>2</sub> O (2.5)           | 0          | 2.5      | 75                     |
| 12              | 2.0            | CsOH•H <sub>2</sub> O (3.0)           | 0          | 1.5      | 66                     |
| 13              | 1.0            | CsOH•H <sub>2</sub> O (2.5)           | 0          | 24       | 65                     |
| 14              | 1.2            | CsOH•H <sub>2</sub> O (2.5)           | 0          | 9        | 72                     |
| 15              | 1.5            | CsOH•H <sub>2</sub> O (2.5)           | 0          | 5        | 75                     |
| 16 <sup>b</sup> | 1.5            | CsOH•H <sub>2</sub> O (2.5)           | 0          | 4        | 72                     |
| 17 <sup>c</sup> | 1.5            | CsOH•H <sub>2</sub> O (2.5)           | 0          | 10       | 79                     |

<sup>a</sup>Isolated yield. <sup>b</sup>The reaction mixture was performed at 0.2 M. <sup>c</sup>The reaction mixture was performed at 0.05 M.



As shown in Table S1, the properties of base greatly influenced the reaction outcome, and CsOH·H<sub>2</sub>O proved to be the best choice, giving **3a** in 73% yield within 3 hours at 0 °C (entries 1-7). The influence on reaction temperature was also evaluated, and the best result was obtained by running the reaction at 0 °C (entries 8-9). The study of the usage of CsOH·H<sub>2</sub>O and BnBr (entries 10-15) showed that when 2.5 equivs CsOH·H<sub>2</sub>O and 1.5 equivs BnBr were used, product **3a** could be obtained in 75% yield within 5 hours (entry 15), which was further increased to 79% if decreasing the concentration of the reaction from 0.1 to 0.05 M (entry 17).

Based on these results, we further tried extending this protocol to a sequential imine formation/*N*-cyclization/*C*-benzylation process. The reaction of *N*-methylisatin **4a**, 2-(2-nitroethyl)aniline **5a** and BnBr **2a** was selected for condition optimization and conducted as follows. To a 25-mL Schlenk tube were added *N*-methylisatin **4a** (40.3 mg, 0.25 mmol), 2-(2-nitroethyl)aniline **5a** (49.9 mg, 0.3 mmol), MS 5Å (250.0 mg) and anhydrous PhMe (1.0 mL), followed by the addition of *p*-TsOH (2.2 mg, 5 mol%). The reaction mixture was stirred at specific temperature till the full consumption of *N*-methylisatin **4a**, and then cooled down to room temperature and concentrated under vacuum. The residue was dissolved in anhydrous MeOH (5.0 mL) followed by the addition of BnBr **2a** (64.1 mg, 0.375 mmol) and CsOH·H<sub>2</sub>O (104.9 mg, 0.625 mmol) at 0 °C. The resulting mixture was stirred at 0 °C for 12 h, and then filtered through short silica gel and washed with CH<sub>2</sub>Cl<sub>2</sub> (30 mL). The filtrate was concentrated and purified by column chromatography (PE/EtOAc, 10/1, v/v) to afford the desired product **3a**.

As shown in Table S2, We first tried running the condensation of *N*-methylisatin **4a** with 2-(2-nitroethyl)aniline **5a** in MeOH, the solvent for the *N*-cyclization and *C*-benzylation reaction, to simplify the operation. However, by screening the temperature (entries 1-2), the proportion of **4a** and **5a** (entry 3), and the amount of *p*-TsOH (entry 4) and addition of MS 5Å (entry 5), no promising results were obtained. To our delight, the desired product **3a** could be obtained in 64% yield using PhMe as solvent (entry 6). When PhMe is removed after the condensation of **4a** and **5a**, the yield of **3a** could be obtained in 68% yield (entry 7), which was further increased to 73% if lowering the temperature of condensation process to 60 °C (entry 8).

**Table S2** Condition optimization for imine formation/*N*-cyclization/*C*-benzylation of isatin.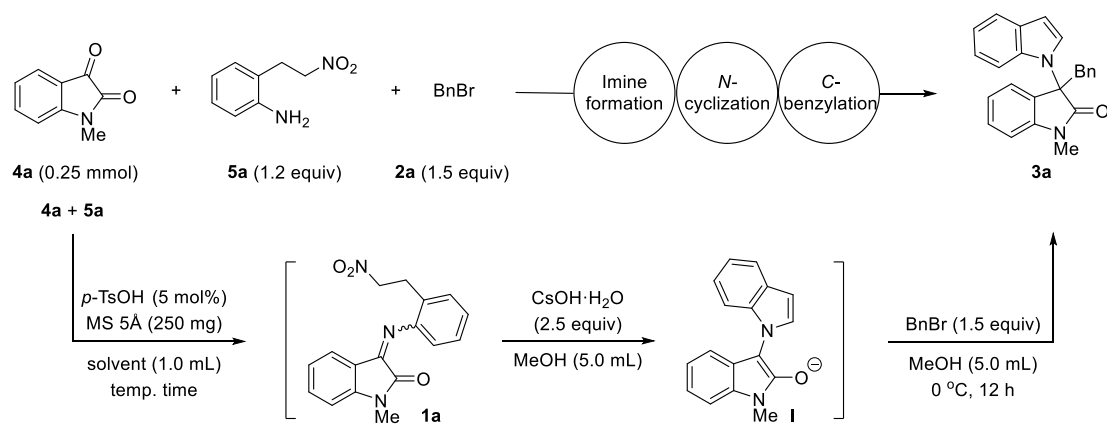

| entry          | 4a:5a | solvent | temp. (°C) | time (h) | yield (%) <sup>a</sup> |
|----------------|-------|---------|------------|----------|------------------------|
| 1              | 1:1.2 | MeOH    | 75         | 3        | 56                     |
| 2              | 1:1.2 | MeOH    | 90         | 3        | 55                     |
| 3              | 1.2:1 | MeOH    | 75         | 3        | 46                     |
| 4 <sup>b</sup> | 1:1.2 | MeOH    | 75         | 3        | 51                     |
| 5 <sup>c</sup> | 1:1.2 | MeOH    | 75         | 3        | 49                     |
| 6              | 1:1.2 | PhMe    | 75         | 3        | 64                     |
| 7 <sup>d</sup> | 1:1.2 | PhMe    | 75         | 3        | 68                     |
| 8 <sup>d</sup> | 1:1.2 | PhMe    | 60         | 3        | 73                     |

<sup>a</sup>Isolated yield. <sup>b</sup>10 mol% of *p*-TsOH was added. <sup>c</sup>500 mg of MS 5Å was added. <sup>d</sup>PhMe was removed in the second step.

The success for the synthesis of C3-quaternary amino-oxindoles encouraged us to probe whether other types of *N*-functionalized indoles could be accessed via this sequence. Accordingly,  $\alpha$ -ketoester derived imine **6a** was subjected to the reaction. Considering the steric congestion of the enolate, with a tetrasubstituted carbon-carbon double bond, the less sterically demanding MeI was employed as the alkylating reagent.

The conditions for the reaction of  $\alpha$ -ketoester derived imine **6a** and MeI **2b** was conducted as follows. To a 25-mL Schlenk tube were added imine **6a** (34.7 mg, 0.1 mmol), specific solvent (1.0 mL) and TBAB (3.2 mg, 10 mol%), followed by the addition of K<sub>2</sub>CO<sub>3</sub> (27.6 mg, 0.2 mmol) at 0 °C. The reaction mixture was stirred at 0 °C for 30 min or 12 h, and then concentrated under vacuum. The residue was dissolved in specific solvent, followed by the addition of MeI and specific base at 0 °C. The resulting mixture was stirred at 0 °C for specific time, and then quenched with saturated aqueous NH<sub>4</sub>Cl (5 mL) and extracted with EtOAc (3 × 10 mL). The combined organic layers were washed with water (3 × 20 mL) and brine (20 mL), then dried over

anhydrous Na<sub>2</sub>SO<sub>4</sub> and concentrated. The resulting residue was purified by column chromatography (PE/EtOAc, 20/1, v/v) to afford the desired product **7a**.

**Table S3** Condition optimization for *N*-cyclization/*C*-methylation of  $\alpha$ -ketoester derived ketimine.

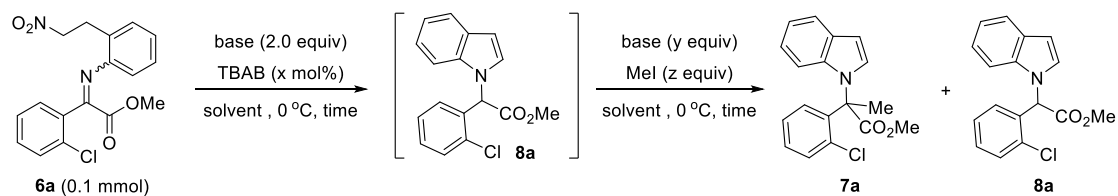

| entry           | N-alkylation                   |          |                   |          | Methylation                           |         |                                       |          | Isolated yield |           |
|-----------------|--------------------------------|----------|-------------------|----------|---------------------------------------|---------|---------------------------------------|----------|----------------|-----------|
|                 | base                           | TBAB (x) | solvent (conc. M) | time (h) | base (y)                              | MeI (z) | solvent (conc. M)                     | time (h) | <b>7a</b>      | <b>8a</b> |
| 1               | K <sub>2</sub> CO <sub>3</sub> | 0        | MeOH (0.1)        | 0.5      | K <sub>2</sub> CO <sub>3</sub> (1.0)  | 1.5     | MeOH (0.1)                            | 24       | 0              | 65%       |
| 2               | K <sub>2</sub> CO <sub>3</sub> | 10       | PhMe (0.1)        | 10       | <sup>t</sup> BuOK (1.0)               | 1.5     | PhMe (0.1)                            | 24       | 0              | 91%       |
| 3               | K <sub>2</sub> CO <sub>3</sub> | 10       | PhMe (0.1)        | 10       | <sup>t</sup> BuOK (1.0)               | 1.5     | CH <sub>2</sub> Cl <sub>2</sub> (0.1) | 24       | 45%            | 10%       |
| 4               | K <sub>2</sub> CO <sub>3</sub> | 10       | PhMe (0.1)        | 10       | <sup>t</sup> BuOK (1.0)               | 1.5     | DMF (0.1)                             | 24       | 53%            | 45%       |
| 5               | K <sub>2</sub> CO <sub>3</sub> | 10       | PhMe (0.1)        | 10       | <sup>t</sup> BuOK (1.0)               | 1.5     | THF (0.1)                             | 24       | 37%            | 41%       |
| 6               | K <sub>2</sub> CO <sub>3</sub> | 10       | PhMe (0.1)        | 10       | <sup>t</sup> BuOK (1.0)               | 1.5     | MeCN (0.1)                            | 24       | 41%            | 54%       |
| 7               | K <sub>2</sub> CO <sub>3</sub> | 10       | PhMe (0.1)        | 10       | <sup>t</sup> BuOK (1.0)               | 1.5     | DMA (0.1)                             | 24       | 58%            | 40%       |
| 8               | K <sub>2</sub> CO <sub>3</sub> | 0        | MeOH (0.1)        | 0.5      | Cs <sub>2</sub> CO <sub>3</sub> (1.0) | 1.5     | DMA (0.1)                             | 24       | 16%            | 70%       |
| 9               | K <sub>2</sub> CO <sub>3</sub> | 0        | MeOH (0.1)        | 0.5      | CsOH·H <sub>2</sub> O (1.0)           | 1.5     | DMA (0.1)                             | 24       | 73%            | trace     |
| 10              | K <sub>2</sub> CO <sub>3</sub> | 0        | MeOH (0.1)        | 0.5      | KOH (1.0)                             | 1.5     | DMA (0.1)                             | 24       | 6%             | 61%       |
| 11              | K <sub>2</sub> CO <sub>3</sub> | 0        | MeOH (0.1)        | 0.5      | NaH (1.0)                             | 1.5     | DMA (0.1)                             | 24       | 80%            | trace     |
| 12              | K <sub>2</sub> CO <sub>3</sub> | 0        | MeOH (0.1)        | 0.5      | NaH (1.5)                             | 1.5     | DMA (0.1)                             | 12       | 86%            | trace     |
| 13              | K <sub>2</sub> CO <sub>3</sub> | 0        | MeOH (0.1)        | 0.5      | NaH (2.0)                             | 1.5     | DMA (0.1)                             | 5        | 87%            | 0         |
| 14              | K <sub>2</sub> CO <sub>3</sub> | 0        | MeOH (0.1)        | 0.5      | NaH (1.5)                             | 2.0     | DMA (0.1)                             | 12       | 90%            | 0         |
| 15              | K <sub>2</sub> CO <sub>3</sub> | 0        | MeOH (0.1)        | 0.5      | NaH (1.5)                             | 2.5     | DMA (0.1)                             | 12       | 90%            | 0         |
| 16              | K <sub>2</sub> CO <sub>3</sub> | 0        | MeOH (0.1)        | 0.5      | NaH (1.5)                             | 2.0     | DMA (0.2)                             | 5        | 83%            | 0         |
| 17              | K <sub>2</sub> CO <sub>3</sub> | 0        | MeOH (0.1)        | 0.5      | NaH (1.5)                             | 2.0     | DMA (0.05)                            | 12       | 93%            | 0         |
| 18 <sup>a</sup> | K <sub>2</sub> CO <sub>3</sub> | 0        | MeOH (0.1)        | 0.5      | NaH (1.5)                             | 2.0     | DMA (0.05)                            | 12       | 69%            | 0         |
| 19 <sup>b</sup> | K <sub>2</sub> CO <sub>3</sub> | 0        | MeOH (0.1)        | 0.5      | NaH (1.5)                             | 2.0     | DMA (0.05)                            | 5        | 75%            | 0         |

<sup>a</sup>The reaction was performed at -10 °C. <sup>b</sup>The reaction was performed at 10 °C.

As shown in Table S3, the nature of the solvent was found to play a crucial role. If the sequence was run in MeOH or toluene, only the *N*-cyclization product **8a** was formed, with no detectable formation of adduct **7a** (entries 1-2). However, if the solvent was removed after the *N*-cyclization step, and then CH<sub>2</sub>Cl<sub>2</sub> and 1.0 equivalent of KOBu<sup>t</sup> were added for the following *C*-methylation

sequence, the desired product **7a** could be obtained in promising 45% yield (entry 3). Further optimization revealed that DMA was the most suitable solvent for the *C*-methylation, giving **7a** in 58% yield (entries 4-7). Further screening of other bases demonstrated that NaH was the best choice (entries 8-11). Evaluating the amount of NaH and MeI indicated that the desired product **7a** was obtained in 90% yield within 12 hours at 0 °C, when using 1.5 equivs NaH and 2.0 equivs MeI (entries 12-15). Further decreasing the concentration from 0.1 to 0.05 M resulted in the improved 93% yield of product **7a** (entry 17). Varying the reaction temperature failed to afford better results (entries 18-19).

Next, we tried to combine the imine formation with the aforementioned process to form a sequential imine formation/*N*-cyclization/*C*-methylation sequence. The condition optimization of the reaction of  $\alpha$ -ketoester **9a**, 2-(2-nitroethyl)aniline **5a** and MeI **2b** was conducted as follows. To a 25-mL Schlenk tube were added  $\alpha$ -ketoester **9a** (0.25 mmol, 1.0 equiv), 2-(2-nitroethyl)aniline **5a** (0.3 mmol, 1.2 equiv), MS 5Å (250.0 mg) and anhydrous PhMe (1.0 mL) or MeOH (1.0 mL), followed by the addition of *p*-TsOH (2.2 mg, 5 mol%). The reaction mixture was stirred at specific temperature till the full consumption of  $\alpha$ -ketoester **9a**, and then cooled down to room temperature for concentration under vacuum. The thus obtained residue was dissolved in anhydrous MeOH (2.5 mL), followed by the addition of K<sub>2</sub>CO<sub>3</sub> (69.1 mg, 0.5 mmol) at 0 °C. The resulting mixture was stirred at 0 °C for 30 min, concentrated in vacuum, and then the residue was dissolved in anhydrous DMA (5.0 mL), followed by the addition of MeI (71.0 mg, 0.5 mmol) and NaH (15.0 mg, 0.375 mmol) at 0 °C. The reaction mixture was stirred at 0 °C for 12 h, and then quenched with saturated aqueous NH<sub>4</sub>Cl (5 mL) and extracted with EtOAc (3 × 10 mL). The combined organic layers were washed with water (3 × 20 mL) and brine (20 mL), then dried over anhydrous Na<sub>2</sub>SO<sub>4</sub> and concentrated. The resulting residue was purified by column chromatography (PE/EtOAc, 20/1, v/v) to afford the desired product **7a**.

As shown in Table S4, we first performed the condensation of  $\alpha$ -ketoester **9a** with 2-(2-nitroethyl)aniline **5a** in MeOH, the solvent previously identified for the *N*-cyclization reaction, to simplify the operation. However, by screening the proportion of **9a** and **5a** (entry 2), and the amount of *p*-TsOH (entry 3) and MS 5Å (entry 4), no satisfactory result was obtained. To our delight, when replacing MeOH by PhMe as the solvent for the condensation, the desired product **7a** could be obtained in 85% isolated yield (entry 5). If lowering the temperature for the

imine formation step, the yield of **7a** obviously decreased (entries 6-7).

**Table S4** Condition optimization for imine formation/*N*-cyclization/*C*-methylation of  $\alpha$ -ketoester.

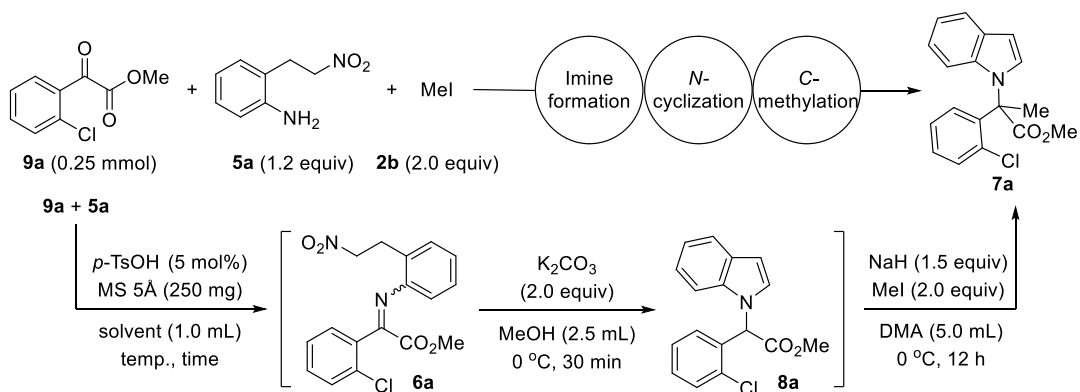

| entry          | solvent | temp. (°C) | time (h) | yield (%) <sup>a</sup> |
|----------------|---------|------------|----------|------------------------|
| 1              | MeOH    | 120        | 6        | 62                     |
| 2 <sup>b</sup> | MeOH    | 120        | 5        | 72                     |
| 3 <sup>c</sup> | MeOH    | 120        | 3        | 57                     |
| 4 <sup>d</sup> | MeOH    | 120        | 6        | 61                     |
| 5              | PhMe    | 120        | 2        | 85                     |
| 6              | PhMe    | 100        | 4        | 75                     |
| 7              | PhMe    | 80         | 5        | 47                     |

<sup>a</sup>Isolated yield. <sup>b</sup>**9a** (1.2 equivs), **5a** (0.25 mmol). <sup>c</sup>10 mol% of *p*-TsOH was added. <sup>d</sup>500 mg of MS 5Å was added.

#### 4. General procedure for one-pot tandem sequence of isatins.

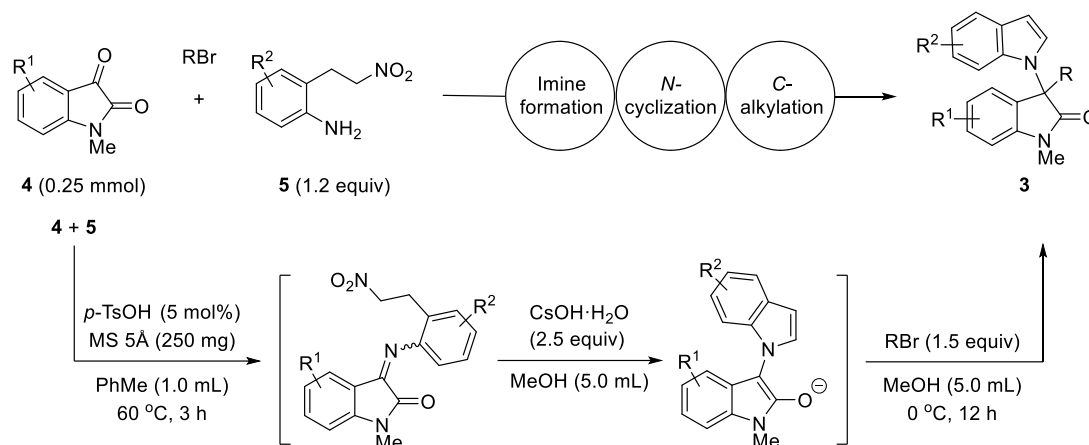

To a 25-mL Schlenk tube were added *N*-methylisatin **4** (0.25 mmol, 1.0 equiv), anilines **5** (0.3 mmol, 1.2 equiv), MS 5Å (250.0 mg) and anhydrous toluene (1.0 mL), followed by the addition of *p*-TsOH (2.2 mg, 5 mol%). The reaction mixture was stirred at 60 °C for 3 h till the full conversion of *N*-methylisatin **4**, and then cooled down to room temperature and concentrated under vacuum. The residue was dissolved in anhydrous MeOH (5.0 mL), followed by the addition of alkyl bromides (0.375 mmol, 1.5 equiv) and CsOH·H<sub>2</sub>O (104.9 mg, 0.625 mmol) at 0 °C. The resulting mixture was stirred at 0 °C for 12 h, and then filtered through short silica gel and washed with CH<sub>2</sub>Cl<sub>2</sub> (30 mL). The filtrate was concentrated and purified by column chromatography (PE/EtOAc, 10/1, v/v) to afford the desired product **3a-3ap**.

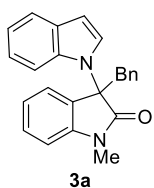

Product **3a** was obtained in 73% yield as white solid; Mp: 179-180 °C; <sup>1</sup>H NMR (400 MHz, CDCl<sub>3</sub>): δ 7.71 (d, *J* = 3.2 Hz, 1H), 7.60 (d, *J* = 8.0 Hz, 1H), 7.28-7.25 (m, 1H), 7.13 (dd, *J*<sub>1</sub> = 17.2 Hz, *J*<sub>2</sub> = 7.6 Hz, 2H), 7.06-7.02 (m, 4H), 6.89 (t, *J* = 8.0 Hz, 1H), 6.79 (d, *J* = 7.6 Hz, 2H), 6.66 (d, *J* = 2.8 Hz, 1H), 6.59 (d, *J* = 8.0 Hz, 1H), 6.49 (d, *J* = 8.4 Hz, 1H), 3.98, 3.76 (AB, *J* = 11.6 Hz, 2H), 2.91 (s, 3H); <sup>13</sup>C NMR (100 MHz, CDCl<sub>3</sub>): δ 174.21, 143.10, 135.83, 132.46, 130.39, 129.90, 128.37, 127.61, 127.31, 125.26, 124.24, 123.21, 122.00, 121.18, 120.13, 111.24, 108.37, 102.77, 68.00, 43.61, 26.05; IR (neat): 3030, 1720, 1612, 1492, 1469, 1456, 1087, 1020, 752, 733, 698; HRMS (ESI): Exact mass calcd for C<sub>24</sub>H<sub>20</sub>N<sub>2</sub>ONa [M+Na]<sup>+</sup>: 375.1468, Found: 375.1476.

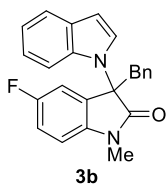

Product **3b** was obtained in 75% yield as white solid; Mp: 180-182 °C; <sup>1</sup>H NMR (400 MHz, CDCl<sub>3</sub>): δ 7.69 (d, *J* = 3.2 Hz, 1H), 7.61 (d, *J* = 7.6 Hz, 1H), 7.14-7.03 (m, 4H), 6.97-6.90 (m, 3H), 6.83 (d, *J* = 7.6 Hz, 2H), 6.68 (d, *J* = 3.2 Hz, 1H), 6.52 (dd, *J*<sub>1</sub> = 8.4 Hz, *J*<sub>2</sub> = 4.0 Hz, 1H), 6.44 (d, *J* = 8.4 Hz, 1H), 3.99, 3.74 (AB, *J* = 11.6 Hz, 2H), 2.91 (s, 3H); <sup>13</sup>C NMR (100 MHz, CDCl<sub>3</sub>): δ 173.97, 159.56 (d, *J* = 241.0 Hz), 139.00 (d, *J* = 2.0 Hz), 135.72, 132.02, 130.31, 130.09 (d, *J* = 7.0 Hz), 129.89, 127.75, 127.51, 125.02, 122.18, 121.33, 120.32, 116.24 (d, *J* = 23.0 Hz), 112.23 (d, *J* = 25.0 Hz), 110.85, 109.04 (d, *J* = 8.0 Hz), 103.10, 68.11, 43.61, 26.19; <sup>19</sup>F NMR (376 MHz, CDCl<sub>3</sub>): δ -118.99; IR (neat): 2929, 1718, 1612, 1492, 1467, 1263, 1236, 1203, 1122, 1099, 1070, 750; HRMS (ESI): Exact mass calcd for C<sub>24</sub>H<sub>19</sub>FN<sub>2</sub>ONa [M+Na]<sup>+</sup>: 393.1374, Found: 393.1376.

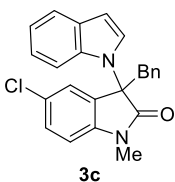

Product **3c** was obtained in 76% yield as yellow solid; Mp: 192-194 °C; <sup>1</sup>H NMR (400 MHz, CDCl<sub>3</sub>): δ 7.69 (d, *J* = 3.2 Hz, 1H), 7.62 (d, *J* = 8.0 Hz, 1H), 7.24 (d, *J* = 8.4 Hz, 1H), 7.14-7.10 (m, 2H), 7.09-7.03 (m, 3H), 6.92 (t, *J* = 7.6 Hz, 1H), 6.81 (d, *J* = 7.6 Hz, 2H), 6.68 (d, *J* = 2.8 Hz, 1H), 6.51 (d, *J* = 8.0 Hz, 1H), 6.44 (d, *J* = 8.4 Hz, 1H), 3.98, 3.75 (AB, *J* = 11.2 Hz, 2H), 2.89 (s, 3H); <sup>13</sup>C NMR (100 MHz, CDCl<sub>3</sub>): δ 173.79, 141.58, 135.69, 131.94, 130.33, 130.17, 129.87, 128.75, 127.80, 127.56, 124.98, 124.45, 122.24, 121.36, 120.35, 110.82, 109.35, 103.15, 67.92, 43.65, 26.17; IR (neat): 2931, 1722, 1610, 1489, 1456, 1234, 1136, 1099, 1018, 734; HRMS (ESI): Exact mass calcd for C<sub>24</sub>H<sub>19</sub>ClN<sub>2</sub>ONa [M+Na]<sup>+</sup>: 409.1078, Found: 409.1089.

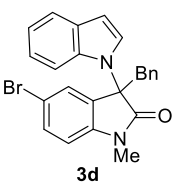

Product **3d** was obtained in 76% yield as white solid; Mp: 214-216 °C; <sup>1</sup>H NMR (400 MHz, CDCl<sub>3</sub>): δ 7.69 (d, *J* = 3.2 Hz, 1H), 7.63 (d, *J* = 8.0 Hz, 1H), 7.39 (d, *J* = 8.4 Hz, 1H), 7.27 (d, *J* = 6.0 Hz, 1H), 7.13-7.06 (m, 4H), 6.94 (t, *J* = 7.6 Hz, 1H), 6.82 (d, *J* = 7.6 Hz, 2H), 6.69 (d, *J* = 3.6 Hz, 1H), 6.46 (dd, *J*<sub>1</sub> = 8.0 Hz, *J*<sub>2</sub> = 4.0 Hz, 2H), 3.98, 3.75 (AB, *J* = 11.6 Hz, 2H), 2.89 (s, 3H); <sup>13</sup>C NMR (100 MHz, CDCl<sub>3</sub>): δ 173.66, 142.09, 135.71, 132.78, 131.95, 130.52, 130.35, 129.89, 127.81, 127.57, 127.18, 124.98, 122.27, 121.37, 120.37, 115.94, 110.83, 109.81, 103.18, 67.87, 43.70, 26.16; IR (neat): 2929, 1722, 1606, 1516, 1508, 1489, 1456, 1359, 1267, 1234, 1099, 736; HRMS (ESI): Exact mass calcd for C<sub>24</sub>H<sub>19</sub>BrN<sub>2</sub>ONa [M+Na]<sup>+</sup>: 453.0573, Found: 453.0581.

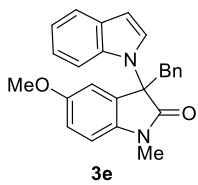

Product **3e** was obtained in 73% yield as yellow solid; Mp: 167-168 °C;  $^1\text{H}$  NMR (400 MHz,  $\text{CDCl}_3$ ):  $\delta$  7.71 (d,  $J = 3.6$  Hz, 1H), 7.62 (d,  $J = 8.0$  Hz, 1H), 7.14-7.12 (m, 1H), 7.09-7.04 (m, 3H), 6.92 (t,  $J = 7.6$  Hz, 1H), 6.85-6.76 (m, 4H), 6.67 (d,  $J = 3.2$  Hz, 1H), 6.51 (d,  $J = 8.4$  Hz, 2H), 3.97, 3.75 (AB,  $J = 11.2$  Hz, 2H), 3.72 (s, 3H), 2.89 (s, 3H);  $^{13}\text{C}$  NMR (100 MHz,  $\text{CDCl}_3$ ):  $\delta$  173.87, 156.49, 136.55, 135.87, 132.45, 130.39, 129.87, 129.58, 127.64, 127.32, 125.19, 122.04, 121.15, 120.14, 114.48, 111.25, 111.12, 108.91, 102.78, 68.28, 55.89, 43.60, 26.12; IR (neat): 2929, 2835, 1716, 1604, 1496, 1471, 1456, 1236, 1224, 1149, 1132, 1028, 731, 698; HRMS (ESI): Exact mass calcd for  $\text{C}_{25}\text{H}_{22}\text{N}_2\text{O}_2\text{Na}$   $[\text{M}+\text{Na}]^+$ : 405.1573, Found: 405.1584.

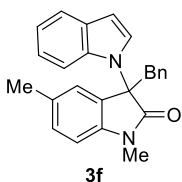

Product **3f** was obtained in 71% yield as white solid; Mp: 166-168 °C;  $^1\text{H}$  NMR (400 MHz,  $\text{CDCl}_3$ ):  $\delta$  7.71 (d,  $J = 3.2$  Hz, 1H), 7.61 (d,  $J = 8.0$  Hz, 1H), 7.12 (t,  $J = 7.2$  Hz, 1H), 7.07-7.01 (m, 4H), 6.96 (s, 1H), 6.91 (t,  $J = 7.6$  Hz, 1H), 6.79 (d,  $J = 7.6$  Hz, 2H), 6.66 (d,  $J = 2.8$  Hz, 1H), 6.49 (t,  $J = 8.0$  Hz, 2H), 3.96, 3.74 (AB,  $J = 11.6$  Hz, 2H), 2.88 (s, 3H), 2.27 (s, 3H);  $^{13}\text{C}$  NMR (100 MHz,  $\text{CDCl}_3$ ):  $\delta$  174.09, 140.71, 135.81, 132.83, 132.52, 130.39, 130.14, 129.81, 128.31, 127.57, 127.26, 125.23, 124.80, 121.97, 121.12, 120.07, 111.28, 108.12, 102.63, 68.04, 43.60, 26.04, 21.21; IR (neat): 2926, 1718, 1604, 1500, 1456, 1361, 1315, 1265, 1238, 1099, 1018, 731; HRMS (ESI): Exact mass calcd for  $\text{C}_{25}\text{H}_{22}\text{N}_2\text{ONa}$   $[\text{M}+\text{Na}]^+$ : 389.1624, Found: 389.1626.

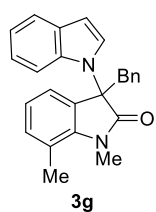

Product **3g** was obtained in 74% yield as white solid; Mp: 153-155 °C;  $^1\text{H}$  NMR (400 MHz,  $\text{CDCl}_3$ ):  $\delta$  7.69 (d,  $J = 3.6$  Hz, 1H), 7.58 (d,  $J = 7.6$  Hz, 1H), 7.13-7.11 (m, 1H), 7.07-6.99 (m, 3H), 6.97-6.86 (m, 4H), 6.74 (d,  $J = 7.6$  Hz, 2H), 6.64 (d,  $J = 3.2$  Hz, 1H), 6.50 (d,  $J = 8.4$  Hz, 1H), 3.94, 3.67 (AB,  $J = 11.2$  Hz, 2H), 3.12 (s, 3H), 2.31 (s, 3H);  $^{13}\text{C}$  NMR (100 MHz,  $\text{CDCl}_3$ ):  $\delta$  174.93, 140.84, 135.80, 133.41, 132.55, 130.37, 129.82, 129.09, 127.48, 127.31, 125.24, 123.14, 121.94, 121.12, 120.10, 120.06, 111.27, 102.64, 67.59, 44.15, 29.46, 18.80; IR (neat): 2927, 1718, 1602, 1473, 1456, 1363, 1323, 1116, 1064, 738, 700; HRMS (ESI): Exact mass calcd for  $\text{C}_{25}\text{H}_{22}\text{N}_2\text{ONa}$   $[\text{M}+\text{Na}]^+$ : 389.1624, Found: 389.1630.



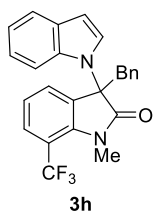

Product **3h** was obtained in 76% yield as yellow solid; Mp: 60-62 °C;  $^1\text{H}$  NMR (400 MHz,  $\text{CDCl}_3$ ):  $\delta$  7.72 (d,  $J = 3.6$  Hz, 1H), 7.62 (d,  $J = 8.0$  Hz, 1H), 7.55 (dd,  $J_1 = 8.0$  Hz,  $J_2 = 0.8$  Hz, 1H), 7.28 (dd,  $J_1 = 7.2$  Hz,  $J_2 = 0.4$  Hz, 1H), 7.16-7.12 (m, 1H), 7.10-7.03 (m, 4H), 6.92-6.71 (m, 1H), 6.70-6.69 (m, 3H), 6.36 (dd,  $J_1 = 8.4$  Hz,  $J_2 = 0.4$  Hz, 1H), 3.99, 3.73 (AB,  $J = 11.2$  Hz, 2H), 3.08 (q,  $J = 2.4$  Hz, 3H);  $^{13}\text{C}$  NMR (100 MHz,  $\text{CDCl}_3$ ):  $\delta$  175.19, 140.90, 135.58, 131.56, 131.31, 130.04, 129.86, 127.80, 127.78, 127.60 (q,  $J = 6.0$  Hz), 127.20, 125.00, 123.25 (q,  $J = 270.0$  Hz), 122.62, 122.35, 121.38, 120.42, 112.91 (q,  $J = 33.0$  Hz), 110.60, 103.22, 66.62, 44.31, 28.76 (q,  $J = 7.0$  Hz);  $^{19}\text{F}$  NMR (376 MHz,  $\text{CDCl}_3$ ):  $\delta$  -53.69; IR (neat): 2927, 1732, 1598, 1489, 1473, 1456, 1321, 1122, 1093, 1074, 1056, 732, 698; HRMS (ESI): Exact mass calcd for  $\text{C}_{25}\text{H}_{19}\text{F}_3\text{N}_2\text{ONa}$   $[\text{M}+\text{Na}]^+$ : 443.1342, Found: 443.1352.

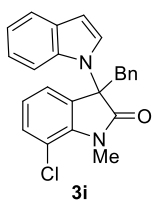

Product **3i** was obtained in 83% yield yellow solid; Mp: 174-176 °C;  $^1\text{H}$  NMR (400 MHz,  $\text{CDCl}_3$ ):  $\delta$  7.70 (d,  $J = 3.6$  Hz, 1H), 7.62 (d,  $J = 7.6$  Hz, 1H), 7.20-7.18 (m, 2H), 7.11 (t,  $J = 7.4$  Hz, 2H), 7.05-7.00 (m, 2H), 6.94 (q,  $J = 8.0$  Hz, 2H), 6.77 (d,  $J = 7.6$  Hz, 2H), 6.68 (d,  $J = 3.2$  Hz, 1H), 6.48 (d,  $J = 8.4$  Hz, 1H), 3.97, 3.71 (AB,  $J = 11.2$  Hz, 2H), 3.26 (s, 3H);  $^{13}\text{C}$  NMR (100 MHz,  $\text{CDCl}_3$ ):  $\delta$  174.56, 138.95, 135.65, 132.01, 131.87, 131.39, 130.22, 129.82, 127.75, 127.72, 125.01, 123.99, 122.46, 122.23, 121.28, 120.31, 115.96, 110.89, 103.03, 67.65, 44.13, 29.47; IR (neat): 2949, 1730, 1608, 1456, 1363, 1321, 1107, 738, 700; HRMS (ESI): Exact mass calcd for  $\text{C}_{24}\text{H}_{19}\text{ClN}_2\text{ONa}$   $[\text{M}+\text{Na}]^+$ : 409.1078, Found: 409.1088.

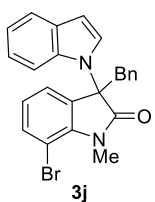

Product **3j** was obtained in 80% yield as white solid; Mp: 150-152 °C;  $^1\text{H}$  NMR (400 MHz,  $\text{CDCl}_3$ ):  $\delta$  7.70 (d,  $J = 3.6$  Hz, 1H), 7.61 (d,  $J = 8.0$  Hz, 1H), 7.37 (d,  $J = 8.0$  Hz, 1H), 7.20 (t,  $J = 7.2$  Hz, 1H), 7.11 (t,  $J = 7.6$  Hz, 2H), 7.07-7.03 (m, 2H), 6.95 (t,  $J = 8.0$  Hz, 1H), 6.87 (t,  $J = 8.0$  Hz, 1H), 6.76 (d,  $J = 7.6$  Hz, 2H), 6.67 (d,  $J = 3.2$  Hz, 1H), 6.47 (d,  $J = 8.4$  Hz, 1H), 3.97, 3.70 (AB,  $J = 11.6$  Hz, 2H), 3.26 (s, 3H);  $^{13}\text{C}$  NMR (100 MHz,  $\text{CDCl}_3$ ):  $\delta$  174.75, 140.46, 135.66, 135.37, 131.86, 131.77, 130.23, 129.84, 127.77, 125.01, 124.38, 122.98, 122.27, 121.30, 120.34, 110.93, 103.07, 102.84, 67.68, 44.26, 29.69; IR (neat): 2927, 1724, 1608, 1577, 1514, 1228, 1101, 1074, 1018, 1006, 731, 700; HRMS (ESI): Exact mass calcd for  $\text{C}_{24}\text{H}_{19}\text{BrN}_2\text{ONa}$   $[\text{M}+\text{Na}]^+$ : 453.0573, Found: 453.0579.

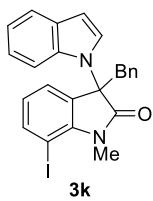

Product **3k** was obtained in 83% yield as yellow solid; Mp: 162-163 °C;  $^1\text{H}$  NMR (400 MHz,  $\text{CDCl}_3$ ):  $\delta$  7.69 (d,  $J = 3.2$  Hz, 1H), 7.66 (d,  $J = 8.0$  Hz, 1H), 7.61 (d,  $J = 8.0$  Hz, 1H), 7.21 (t,  $J = 7.2$  Hz, 1H), 7.11 (t,  $J = 7.6$  Hz, 2H), 7.05 (t,  $J = 5.6$  Hz, 2H), 6.95 (t,  $J = 8.0$  Hz, 1H), 6.75-6.70 (m, 3H), 6.67 (d,  $J = 3.2$  Hz, 1H), 6.45 (d,  $J = 8.4$  Hz, 1H), 3.96, 3.69 (AB,  $J = 11.2$  Hz, 2H), 3.26 (s, 3H);  $^{13}\text{C}$  NMR (100 MHz,  $\text{CDCl}_3$ ):  $\delta$  175.03, 143.50, 142.30, 135.65, 131.86, 131.71, 130.21, 129.83, 127.76, 127.74, 125.03, 124.87, 123.65, 122.26, 121.29, 120.33, 110.95, 103.05, 71.81, 67.60, 44.31, 29.93; IR (neat): 2926, 2854, 1724, 1602, 1571, 1516, 1454, 1317, 1228, 1097, 1072, 734, 700; HRMS (ESI): Exact mass calcd for  $\text{C}_{24}\text{H}_{19}\text{IN}_2\text{ONa}$   $[\text{M}+\text{Na}]^+$ : 501.0434, Found: 501.0441.

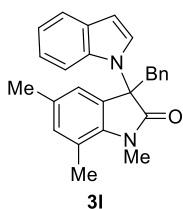

Product **3l** was obtained in 70% yield as yellow solid; Mp: 128-130 °C;  $^1\text{H}$  NMR (400 MHz,  $\text{CDCl}_3$ ):  $\delta$  7.73 (d,  $J = 3.6$  Hz, 1H), 7.64 (d,  $J = 7.6$  Hz, 1H), 7.17-7.16 (m, 1H), 7.12-7.04 (m, 3H), 6.98-6.94 (m, 1H), 6.82-6.78 (m, 4H), 6.69 (d,  $J = 3.2$  Hz, 1H), 6.58 (d,  $J = 8.4$  Hz, 1H), 3.96, 3.70 (AB,  $J = 11.2$  Hz, 2H), 3.13 (s, 3H), 2.31 (s, 3H), 2.23 (s, 3H);  $^{13}\text{C}$  NMR (100 MHz,  $\text{CDCl}_3$ ): 174.80, 138.41, 135.77, 133.88, 132.67, 132.61, 130.39, 129.74, 129.10, 127.46, 127.27, 125.21, 122.40, 121.94, 121.07, 120.02, 119.79, 111.33, 102.51, 67.65, 44.16, 29.40, 20.91, 18.66; IR (neat): 2924, 1716, 1602, 1508, 1483, 1473, 1456, 1323, 1230, 1099, 738, 700; HRMS (ESI): Exact mass calcd for  $\text{C}_{26}\text{H}_{24}\text{N}_2\text{ONa}$   $[\text{M}+\text{Na}]^+$ : 403.1781, Found: 403.1790.

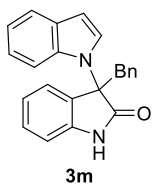

Product **3m** was obtained in 54% yield as white solid; Mp: 218-220 °C;  $^1\text{H}$  NMR (400 MHz,  $\text{CDCl}_3$ ):  $\delta$  8.01 (s, 1H), 7.70 (d,  $J = 3.6$  Hz, 1H), 7.62 (d,  $J = 7.6$  Hz, 1H), 7.20 (td,  $J_1 = 7.6$  Hz,  $J_2 = 1.2$  Hz, 1H), 7.16-7.10 (m, 2H), 7.09-6.99 (m, 4H), 6.93-6.84 (m, 3H), 6.70-6.57 (m, 3H), 4.00, 3.80 (AB,  $J = 11.6$  Hz, 2H);  $^{13}\text{C}$  NMR (100 MHz,  $\text{CDCl}_3$ ):  $\delta$  176.67, 140.25, 135.85, 132.28, 130.57, 129.94, 129.86, 128.70, 127.89, 127.42, 125.20, 124.65, 123.24, 122.12, 121.21, 120.23, 111.36, 110.63, 102.89, 68.21, 43.42; IR (neat): 2926, 2852, 1722, 1620, 1516, 1489, 1471, 1456, 1263, 1220, 732, 698; HRMS (ESI): Exact mass calcd for  $\text{C}_{23}\text{H}_{18}\text{N}_2\text{ONa}$   $[\text{M}+\text{Na}]^+$ : 361.1311, Found: 361.1312.

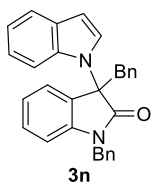

Product **3n** was obtained in 75% yield as white solid; Mp: 148-150 °C;  $^1\text{H}$  NMR (400 MHz,  $\text{CDCl}_3$ ):  $\delta$  7.71 (d,  $J = 3.2$  Hz, 1H), 7.59 (d,  $J = 8.0$  Hz, 1H), 7.22-7.12 (m, 6H), 7.08-7.00 (m, 4H), 6.88-6.81 (m, 5H), 6.65 (d,  $J = 3.2$  Hz, 1H), 6.46 (dd,  $J_1 = 14.4$  Hz,  $J_2 = 7.6$  Hz, 2H), 4.75, 4.50 (AB,  $J = 15.6$  Hz, 2H), 4.08, 3.80 (AB,  $J = 11.6$  Hz, 2H);  $^{13}\text{C}$  NMR (100 MHz,  $\text{CDCl}_3$ ):  $\delta$  174.36, 142.72, 135.83, 135.08, 132.58, 130.75, 129.96, 129.92, 128.78, 128.36, 128.01, 127.67, 127.52, 127.41, 125.26, 124.45, 123.27, 121.92, 121.20, 120.16, 111.56, 109.77, 102.81, 67.91, 44.27, 43.31; IR (neat): 2926, 2852, 1722, 1610, 1516, 1489, 1467, 1454, 1193, 1029, 1018, 731, 696; HRMS (ESI): Exact mass calcd for  $\text{C}_{30}\text{H}_{24}\text{N}_2\text{ONa}$  [ $\text{M}+\text{Na}$ ] $^+$ : 451.1781, Found: 451.1788.

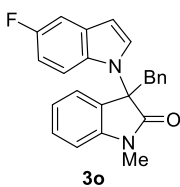

Product **3o** was obtained in 68% yield as white solid; Mp: 192-194 °C;  $^1\text{H}$  NMR (400 MHz,  $\text{CDCl}_3$ ):  $\delta$  7.74 (d,  $J = 3.6$  Hz, 1H), 7.30-7.22 (m, 2H), 7.15-7.10 (m, 2H), 7.07-7.03 (m, 3H), 6.78 (d,  $J = 7.6$  Hz, 2H), 6.65-6.59 (m, 3H), 6.40 (dd,  $J_1 = 9.2$  Hz,  $J_2 = 4.4$  Hz, 1H), 3.96, 3.73 (AB,  $J = 11.6$  Hz, 2H), 2.91 (s, 3H);  $^{13}\text{C}$  NMR (100 MHz,  $\text{CDCl}_3$ ):  $\delta$  174.05, 159.19 (d,  $J = 234.0$  Hz), 143.03, 132.34, 132.25, 130.34, 130.32 (d,  $J = 10.0$  Hz), 130.09, 128.04, 127.66, 127.40, 126.99, 124.20, 123.32, 111.85 (d,  $J = 9.0$  Hz), 110.30 (d,  $J = 25.0$  Hz), 108.50, 105.93 (d,  $J = 23.0$  Hz), 102.75 (d,  $J = 5.0$  Hz), 68.04, 43.52, 26.10;  $^{19}\text{F}$  NMR (376 MHz,  $\text{CDCl}_3$ ):  $\delta$  -124.69; IR (neat): 2927, 2850, 1720, 1612, 1508, 1490, 1448, 1371, 1124, 1020, 1001, 736, 700; HRMS (ESI): Exact mass calcd for  $\text{C}_{24}\text{H}_{19}\text{FN}_2\text{ONa}$  [ $\text{M}+\text{Na}$ ] $^+$ : 393.1374, Found: 393.1383.

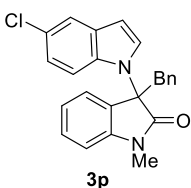

Product **3p** was obtained in 61% yield as yellow solid; Mp: 175-176 °C;  $^1\text{H}$  NMR (400 MHz,  $\text{CDCl}_3$ ):  $\delta$  7.71 (d,  $J = 3.6$  Hz, 1H), 7.56 (d,  $J = 2.0$  Hz, 1H), 7.30-7.26 (m, 1H), 7.12 (t,  $J = 7.6$  Hz, 2H), 7.05 (td,  $J_1 = 8.0$  Hz,  $J_2 = 2.0$  Hz, 3H), 6.85 (dd,  $J_1 = 9.2$  Hz,  $J_2 = 2.4$  Hz, 1H), 6.77 (d,  $J = 7.2$  Hz, 2H), 6.61-6.59 (m, 2H), 6.40 (d,  $J = 8.8$  Hz, 1H), 3.95, 3.73 (AB,  $J = 11.6$  Hz, 2H), 2.91 (s, 3H);  $^{13}\text{C}$  NMR (100 MHz,  $\text{CDCl}_3$ ):  $\delta$  173.97, 143.07, 134.17, 132.22, 130.98, 130.35, 130.16, 127.98, 127.69, 127.44, 126.73, 125.95, 124.24, 123.34, 122.30, 120.55, 112.26, 108.55, 102.42, 68.07, 43.50, 26.12; IR (neat): 2927, 1720, 1612, 1508, 1492, 1469, 1456, 1126, 1089, 1020, 729, 700; HRMS (ESI): Exact mass calcd for  $\text{C}_{24}\text{H}_{19}\text{ClN}_2\text{ONa}$  [ $\text{M}+\text{Na}$ ] $^+$ : 409.1078, Found: 409.1085.

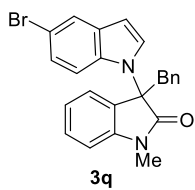

Product **3q** was obtained in 70% yield as yellow solid; Mp: 160-162 °C;  $^1\text{H}$  NMR (400 MHz,  $\text{CDCl}_3$ ):  $\delta$  7.72 (d,  $J = 1.6$  Hz, 1H), 7.70 (d,  $J = 3.6$  Hz, 1H), 7.30-7.26 (m, 1H), 7.13-7.11 (m, 2H), 7.05 (t,  $J = 7.6$  Hz, 3H), 6.98 (dd,  $J_1 = 8.8$  Hz,  $J_2 = 2.0$  Hz, 1H), 6.78 (d,  $J = 7.2$  Hz, 2H), 6.61-6.59 (m, 2H), 6.36 (d,  $J = 8.8$  Hz, 1H), 3.95, 3.73 (AB,  $J = 11.2$  Hz, 2H), 2.91 (s, 3H);  $^{13}\text{C}$  NMR (100 MHz,  $\text{CDCl}_3$ ):  $\delta$  173.91, 143.00, 134.40, 132.15, 131.57, 130.32, 130.16, 127.89, 127.67, 127.43, 126.56, 124.83, 124.19, 123.63, 123.33, 113.56, 112.67, 108.54, 102.30, 68.02, 43.45, 26.11; IR (neat): 2922, 1720, 1612, 1508, 1492, 1469, 1452, 1126, 1089, 1020, 1001, 750, 698; HRMS (ESI): Exact mass calcd for  $\text{C}_{24}\text{H}_{19}\text{BrN}_2\text{ONa}$   $[\text{M}+\text{Na}]^+$ : 453.0573, Found: 453.0580.

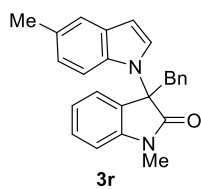

Product **3r** was obtained in 71% yield as yellow solid; Mp: 173-174 °C;  $^1\text{H}$  NMR (400 MHz,  $\text{CDCl}_3$ ):  $\delta$  7.64 (d,  $J = 3.2$  Hz, 1H), 7.37 (s, 1H), 7.26-7.22 (m, 1H), 7.14-7.08 (m, 2H), 7.04-6.99 (m, 3H), 6.78 (d,  $J = 7.6$  Hz, 2H), 6.71 (d,  $J = 8.4$  Hz, 1H), 6.58-6.56 (m, 2H), 6.35 (d,  $J = 8.4$  Hz, 1H), 3.96, 3.72 (AB,  $J = 11.2$  Hz, 2H), 2.89 (s, 3H), 2.33 (s, 3H);  $^{13}\text{C}$  NMR (100 MHz,  $\text{CDCl}_3$ ):  $\delta$  174.25, 143.08, 134.16, 132.51, 130.37, 130.15, 129.84, 129.31, 128.42, 127.58, 127.27, 125.33, 124.22, 123.58, 123.18, 120.89, 110.81, 108.32, 102.24, 67.92, 43.48, 26.02, 21.31; IR (neat): 2924, 2854, 1722, 1612, 1492, 1469, 1456, 1371, 1319, 750, 736, 700; HRMS (ESI): Exact mass calcd for  $\text{C}_{25}\text{H}_{22}\text{N}_2\text{ONa}$   $[\text{M}+\text{Na}]^+$ : 389.1624, Found: 389.1630.

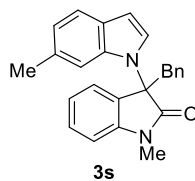

Product **3s** was obtained in 74% yield as yellow solid; Mp: 180-182 °C;  $^1\text{H}$  NMR (400 MHz,  $\text{CDCl}_3$ ):  $\delta$  7.51 (d,  $J = 3.6$  Hz, 1H), 7.38 (d,  $J = 8.0$  Hz, 1H), 7.19-7.14 (m, 1H), 7.05-7.00 (m, 2H), 6.97-6.93 (m, 3H), 6.77 (d,  $J = 8.0$  Hz, 1H), 6.70 (d,  $J = 7.6$  Hz, 2H), 6.50-6.49 (m, 2H), 6.19 (s, 1H), 3.87, 3.65 (AB,  $J = 11.6$  Hz, 2H), 2.82 (s, 3H), 2.10 (s, 3H);  $^{13}\text{C}$  NMR (100 MHz,  $\text{CDCl}_3$ ):  $\delta$  174.29, 143.05, 136.19, 132.53, 131.43, 130.37, 129.83, 128.36, 127.65, 127.57, 127.25, 124.64, 124.27, 123.18, 121.88, 120.72, 111.35, 108.26, 102.51, 67.91, 43.50, 26.03, 22.19; IR (neat): 2927, 2858, 1722, 1612, 1508, 1492, 1469, 1456, 1373, 1325, 1238, 1089, 754, 700; HRMS (ESI): Exact mass calcd for  $\text{C}_{25}\text{H}_{22}\text{N}_2\text{ONa}$   $[\text{M}+\text{Na}]^+$ : 389.1624, Found: 389.1627.

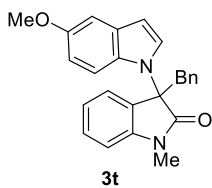

Product **3t** was obtained in 73% yield as yellow solid; Mp: 153-155 °C;  $^1\text{H}$  NMR (400 MHz,  $\text{CDCl}_3$ ):  $\delta$  7.64 (d,  $J = 3.2$  Hz, 1H), 7.26-7.22 (m, 1H), 7.13-7.08 (m, 2H), 7.04-7.00 (m, 4H), 6.77 (d,  $J = 7.6$  Hz, 2H), 6.58-6.53 (m, 3H), 6.37 (d,  $J = 9.2$  Hz, 1H), 3.94, 3.73 (AB,  $J = 11.6$  Hz, 2H), 3.75 (s, 3H), 2.88 (s, 3H);  $^{13}\text{C}$  NMR (100 MHz,  $\text{CDCl}_3$ ):  $\delta$  174.23, 154.28, 143.07, 132.49, 131.05, 130.44, 130.36, 129.91, 128.32, 127.60, 127.28, 125.95, 124.25, 123.20, 112.00, 111.91, 108.38, 102.92, 102.42, 67.95, 55.78, 43.45, 26.05; IR (neat): 2931, 2831, 1722, 1614, 1492, 1473, 1448, 1371, 1247, 767, 750, 700; HRMS (ESI): Exact mass calcd for  $\text{C}_{25}\text{H}_{22}\text{N}_2\text{O}_2\text{Na}$   $[\text{M}+\text{Na}]^+$ : 405.1573, Found: 405.1582.

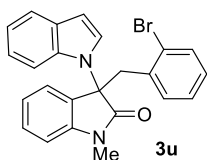

Product **3u** was obtained in 68% yield as yellow solid; Mp: 149-151 °C;  $^1\text{H}$  NMR (400 MHz,  $\text{CDCl}_3$ ):  $\delta$  7.62 (d,  $J = 2.8$  Hz, 1H), 7.59 (d,  $J = 8.0$  Hz, 1H), 7.32 (d,  $J = 8.0$  Hz, 1H), 7.27-7.23 (m, 1H), 7.19 (d,  $J = 7.4$  Hz, 1H), 7.08-7.01 (m, 3H), 6.98-6.89 (m, 3H), 6.66-6.60 (m, 3H), 4.38, 3.98 (AB,  $J = 12.4$  Hz, 2H), 3.10 (s, 3H);  $^{13}\text{C}$  NMR (100 MHz,  $\text{CDCl}_3$ ):  $\delta$  174.71, 142.86, 135.79, 133.02, 132.95, 131.18, 130.13, 129.02, 126.78, 126.42, 126.31, 125.80, 122.85, 122.02, 121.26, 120.19, 111.87, 108.09, 102.85, 67.87, 40.99, 26.34; IR (neat): 1720, 1612, 1471, 1456, 1263, 1234, 1029, 1020, 702, 538; HRMS (ESI): Exact mass calcd for  $\text{C}_{24}\text{H}_{19}\text{BrN}_2\text{ONa}$   $[\text{M}+\text{Na}]^+$ : 453.0573, Found: 453.0579.

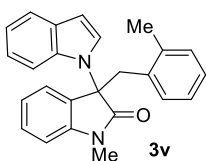

Product **3v** was obtained in 77% yield as yellow solid; Mp: 150-152 °C;  $^1\text{H}$  NMR (400 MHz,  $\text{CDCl}_3$ ):  $\delta$  7.70 (d,  $J = 3.2$  Hz, 1H), 7.61 (d,  $J = 8.0$  Hz, 1H), 7.30-7.26 (m, 1H), 7.07-6.96 (m, 5H), 6.91-6.88 (m, 2H), 6.71 (d,  $J = 7.6$  Hz, 1H), 6.67-6.65 (m, 2H), 6.55 (d,  $J = 8.4$  Hz, 1H), 3.97 (s, 2H), 3.00 (s, 3H), 2.10 (s, 3H);  $^{13}\text{C}$  NMR (100 MHz,  $\text{CDCl}_3$ ):  $\delta$  174.87, 143.29, 137.70, 135.82, 131.18, 130.47, 130.36, 130.04, 128.24, 127.40, 125.60, 125.11, 124.92, 122.88, 121.98, 121.21, 120.13, 111.64, 108.36, 102.75, 68.11, 39.04, 26.19, 20.07; IR (neat): 2931, 1722, 1612, 1490, 1469, 1456, 1371, 1328, 1128, 1020, 736, 538; HRMS (ESI): Exact mass calcd for  $\text{C}_{25}\text{H}_{22}\text{N}_2\text{ONa}$   $[\text{M}+\text{Na}]^+$ : 389.1624, Found: 389.1633.

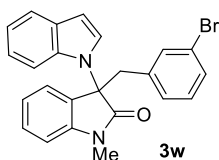

Product **3w** was obtained in 84% yield as yellow solid; Mp: 144-146 °C;  $^1\text{H}$  NMR (400 MHz,  $\text{CDCl}_3$ ):  $\delta$  7.62 (d,  $J = 3.2$  Hz, 1H), 7.58 (d,  $J = 8.0$  Hz, 1H), 7.29-7.22 (m, 2H), 7.10 (d,  $J = 7.2$  Hz, 1H), 7.04-6.99 (m, 2H), 6.90-6.88 (m, 3H), 6.74 (d,  $J = 8.0$  Hz, 1H), 6.64-6.60 (m, 2H), 6.48 (d,  $J = 8.4$  Hz, 1H), 3.91, 3.66 (AB,  $J = 11.6$  Hz, 2H), 2.93 (s, 3H);  $^{13}\text{C}$  NMR (100 MHz,  $\text{CDCl}_3$ ):  $\delta$  173.91, 142.94, 135.77, 134.82, 133.16, 130.41, 130.19, 129.86, 129.16, 129.07, 127.88, 125.13, 124.21, 123.37, 122.07, 121.51, 121.22, 120.21, 111.21, 108.55, 102.91, 67.75, 43.11, 26.08; IR (neat): 2933, 1720, 1612, 1490, 1471, 1456, 1327, 1263, 1126, 1072, 696, 688; HRMS (ESI): Exact mass calcd for  $\text{C}_{24}\text{H}_{19}\text{BrN}_2\text{ONa}$   $[\text{M}+\text{Na}]^+$ : 453.0573, Found: 453.0582.

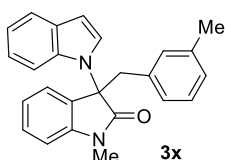

Product **3x** was obtained in 77% yield as yellow solid; Mp: 128-130 °C;  $^1\text{H}$  NMR (400 MHz,  $\text{CDCl}_3$ ):  $\delta$  7.70 (d,  $J = 3.2$  Hz, 1H), 7.60 (d,  $J = 8.0$  Hz, 1H), 7.28-7.23 (m, 1H), 7.14 (d,  $J = 7.6$  Hz, 1H), 7.05-7.00 (m, 2H), 6.95-6.87 (m, 3H), 6.66 (d,  $J = 3.2$  Hz, 1H), 6.61-6.58 (m, 3H), 6.49 (d,  $J = 8.4$  Hz, 1H), 3.94, 3.71 (AB,  $J = 11.2$  Hz, 2H), 2.92 (s, 3H), 2.13 (s, 3H);  $^{13}\text{C}$  NMR (100 MHz,  $\text{CDCl}_3$ ):  $\delta$  174.23, 143.21, 137.22, 135.87, 132.36, 131.12, 129.91, 129.82, 128.54, 127.94, 127.50, 127.45, 125.31, 124.31, 123.12, 121.98, 121.18, 120.12, 111.31, 108.31, 102.73, 68.04, 43.61, 26.04, 21.20; IR (neat): 2928, 1720, 1687, 1612, 1490, 1469, 1456, 1328, 1126, 1093, 1018, 700, 692, 538; HRMS (ESI): Exact mass calcd for  $\text{C}_{25}\text{H}_{22}\text{N}_2\text{ONa}$   $[\text{M}+\text{Na}]^+$ : 389.1624, Found: 389.1631.

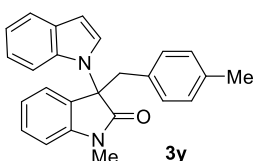

Product **3y** was obtained in 77% yield as yellow solid; Mp: 190-192 °C;  $^1\text{H}$  NMR (400 MHz,  $\text{CDCl}_3$ ):  $\delta$  7.68 (d,  $J = 3.2$  Hz, 1H), 7.58 (d,  $J = 8.0$  Hz, 1H), 7.27-7.23 (m, 1H), 7.11 (d,  $J = 7.6$  Hz, 1H), 7.00 (t,  $J = 7.6$  Hz, 2H), 6.89-6.82 (m, 3H), 6.67-6.60 (m, 4H), 6.48 (d,  $J = 8.4$  Hz, 1H), 3.92, 3.70 (AB,  $J = 11.6$  Hz, 2H), 2.91 (s, 3H), 2.21 (s, 3H);  $^{13}\text{C}$  NMR (100 MHz,  $\text{CDCl}_3$ ):  $\delta$  174.28, 143.19, 136.86, 135.84, 130.24, 129.90, 129.83, 129.31, 128.50, 128.33, 125.31, 124.24, 123.14, 121.95, 121.15, 120.09, 111.29, 108.39, 102.69, 67.97, 43.19, 26.08, 21.13; IR (neat): 2926, 1720, 1612, 1514, 1490, 1469, 1456, 1328, 1126, 1020, 702, 692; HRMS (ESI): Exact mass calcd for  $\text{C}_{25}\text{H}_{22}\text{N}_2\text{ONa}$   $[\text{M}+\text{Na}]^+$ : 389.1624, Found: 389.1630.

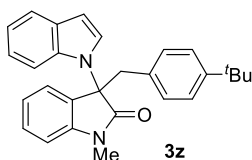

Product **3z** was obtained in 71% yield as yellow solid; Mp: 156-158 °C; <sup>1</sup>H NMR (400 MHz, CDCl<sub>3</sub>): δ 7.61 (d, *J* = 3.2 Hz, 1H), 7.50 (d, *J* = 8.0 Hz, 1H), 7.16 (t, *J* = 7.8 Hz, 1H), 7.02 (d, *J* = 7.6 Hz, 1H), 6.97-6.92 (m, 4H), 6.80 (t, *J* = 8.0 Hz, 1H), 6.60 (d, *J* = 8.0 Hz, 2H), 6.56 (d, *J* = 3.2 Hz, 1H), 6.46 (d, *J* = 7.6 Hz, 1H), 6.40 (d, *J* = 8.4 Hz, 1H), 3.84, 3.63 (AB, *J* = 11.2 Hz, 2H), 2.76 (s, 3H), 1.13 (s, 9H); <sup>13</sup>C NMR (100 MHz, CDCl<sub>3</sub>): δ 174.20, 150.32, 143.13, 135.83, 130.00, 129.85, 129.82, 129.29, 128.52, 125.32, 124.35, 124.16, 123.13, 121.92, 121.12, 120.07, 111.24, 108.20, 102.66, 68.06, 43.19, 34.45, 31.36, 25.98; IR (neat): 2960, 2868, 1722, 1612, 1492, 1469, 1456, 1371, 1236, 1128, 1020, 736; HRMS (ESI): Exact mass calcd for C<sub>28</sub>H<sub>28</sub>N<sub>2</sub>ONa [M+Na]<sup>+</sup>: 431.2094, Found: 431.2105.

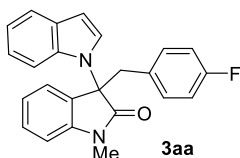

Product **3aa** was obtained in 74% yield as yellow solid; Mp: 228-230 °C; <sup>1</sup>H NMR (400 MHz, CDCl<sub>3</sub>): δ 7.67 (d, *J* = 3.2 Hz, 1H), 7.60 (d, *J* = 8.0 Hz, 1H), 7.29 (t, *J* = 7.6 Hz, 1H), 7.15 (d, *J* = 7.2 Hz, 1H), 7.04 (dd, *J*<sub>1</sub> = 14.8 Hz, *J*<sub>2</sub> = 7.2 Hz, 2H), 6.90 (t, *J* = 8.0 Hz, 1H), 6.76-6.72 (m, 4H), 6.66-6.63 (m, 2H), 6.48 (d, *J* = 8.4 Hz, 1H), 3.97, 3.73 (AB, *J* = 11.6 Hz, 2H), 2.95 (s, 3H); <sup>13</sup>C NMR (100 MHz, CDCl<sub>3</sub>): δ 174.10, 162.20 (d, *J* = 244.0 Hz), 143.06, 135.81, 131.96 (d, *J* = 8.0 Hz), 130.07, 129.88, 128.24 (d, *J* = 3.0 Hz), 128.18, 125.14, 124.20, 123.34, 122.07, 121.22, 120.20, 114.54 (d, *J* = 21.0 Hz), 111.19, 108.53, 102.88, 67.85, 42.70, 26.09; <sup>19</sup>F NMR (376 MHz, CDCl<sub>3</sub>): δ -115.06; IR (neat): 2918, 2849, 1724, 1610, 1508, 1490, 1469, 1456, 1236, 1219, 1097, 837, 752, 738; HRMS (ESI): Exact mass calcd for C<sub>24</sub>H<sub>19</sub>FN<sub>2</sub>ONa [M+Na]<sup>+</sup>: 393.1374, Found: 393.1381.

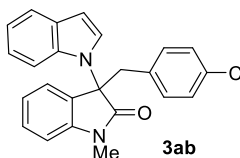

Product **3ab** was obtained in 73% yield as yellow solid; Mp: 230-232 °C; <sup>1</sup>H NMR (400 MHz, CDCl<sub>3</sub>): δ 7.66 (d, *J* = 3.2 Hz, 1H), 7.60 (d, *J* = 8.0 Hz, 1H), 7.30 (t, *J* = 7.6 Hz, 1H), 7.15 (d, *J* = 7.6 Hz, 1H), 7.06-7.02 (m, 4H), 6.91 (t, *J* = 8.0 Hz, 1H), 6.73 (d, *J* = 8.0 Hz, 2H), 6.66-6.65 (m, 2H), 6.50 (d, *J* = 8.4 Hz, 1H), 3.96, 3.73 (AB, *J* = 11.6 Hz, 2H), 2.96 (s, 3H); <sup>13</sup>C NMR (100 MHz, CDCl<sub>3</sub>): δ 174.00, 143.08, 135.80, 133.42, 131.72, 131.08, 130.16, 129.91, 128.04, 127.84, 125.13, 124.24, 123.36, 122.10, 121.25, 120.23, 111.23, 108.64, 102.93, 67.75, 42.83, 26.14; IR (neat): 2929, 1612, 1490, 1469, 1456, 1126, 1091, 1082, 1014, 763, 752; HRMS (ESI): Exact mass calcd for C<sub>24</sub>H<sub>19</sub>ClN<sub>2</sub>ONa

[M+Na]<sup>+</sup>: 409.1078, Found: 409.1086.

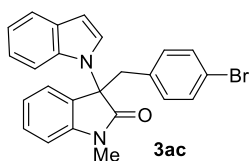

Product **3ac** was obtained in 80% yield as yellow solid; Mp: 210-212 °C; <sup>1</sup>H NMR (400 MHz, CDCl<sub>3</sub>): δ 7.65 (d, *J* = 3.2 Hz, 1H), 7.60 (d, *J* = 7.6 Hz, 1H), 7.30 (t, *J* = 8.0 Hz, 1H), 7.16 (dd, *J*<sub>1</sub> = 16.8 Hz, *J*<sub>2</sub> = 8.0 Hz, 3H), 7.04 (dd, *J*<sub>1</sub> = 12.4 Hz, *J*<sub>2</sub> = 6.8 Hz, 2H), 6.91 (t, *J* = 8.0 Hz, 1H), 6.67-6.65 (m, 4H), 6.50 (d, *J* = 8.4 Hz, 1H), 3.94, 3.71 (AB, *J* = 11.6 Hz, 2H), 2.96 (s, 3H); <sup>13</sup>C NMR (100 MHz, CDCl<sub>3</sub>): δ 174.00, 143.07, 135.79, 132.07, 131.60, 130.80, 130.19, 129.91, 128.01, 125.13, 124.25, 123.38, 122.11, 121.60, 121.25, 120.23, 111.23, 108.67, 102.94, 67.69, 42.88, 26.15; IR (neat): 2933, 1724, 1612, 1508, 1489, 1469, 1456, 1263, 1126, 1093, 808, 522; HRMS (ESI): Exact mass calcd for C<sub>24</sub>H<sub>19</sub>BrN<sub>2</sub>ONa [M+Na]<sup>+</sup>: 453.0573, Found: 453.0581.

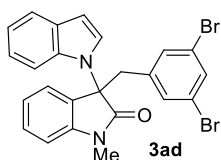

Product **3ad** was obtained in 83% yield as yellow solid; Mp: 178-179 °C; <sup>1</sup>H NMR (400 MHz, CDCl<sub>3</sub>): δ 7.63-7.60 (m, 2H), 7.45 (s, 1H), 7.34 (t, *J* = 7.6 Hz, 1H), 7.13 (d, *J* = 7.2 Hz, 1H), 7.07 (dd, *J*<sub>1</sub> = 15.2 Hz, *J*<sub>2</sub> = 7.6 Hz, 2H), 6.93 (t, *J* = 7.6 Hz, 1H), 6.89 (s, 2H), 6.71-6.67 (m, 2H), 6.52 (d, *J* = 8.4 Hz, 1H), 3.90, 3.64 (AB, *J* = 11.6 Hz, 2H), 3.02 (s, 3H); <sup>13</sup>C NMR (100 MHz, CDCl<sub>3</sub>): δ 173.65, 142.81, 136.50, 135.72, 132.94, 132.10, 130.45, 129.85, 127.46, 125.01, 124.25, 123.51, 122.15, 121.85, 121.27, 120.31, 111.19, 108.72, 103.05, 67.55, 42.71, 26.14; IR (neat): 2931, 1716, 1612, 1552, 1490, 1469, 1456, 1313, 1126, 1089, 1001, 732; HRMS (ESI): Exact mass calcd for C<sub>24</sub>H<sub>18</sub>Br<sub>2</sub>N<sub>2</sub>ONa [M+Na]<sup>+</sup>: 530.9678, Found: 530.9684.

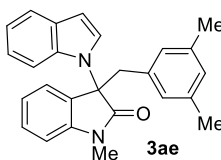

Product **3ae** was obtained in 73% yield as yellow solid; Mp: 144-146 °C; <sup>1</sup>H NMR (400 MHz, CDCl<sub>3</sub>): δ 7.69 (d, *J* = 3.6 Hz, 1H), 7.58 (d, *J* = 8.0 Hz, 1H), 7.26-7.22 (m, 1H), 7.12 (d, *J* = 7.2 Hz, 1H), 7.01 (t, *J* = 7.6 Hz, 2H), 6.88 (t, *J* = 7.6 Hz, 1H), 6.72 (s, 1H), 6.64 (d, *J* = 2.4 Hz, 1H), 6.58 (d, *J* = 8.0 Hz, 1H), 6.48 (d, *J* = 8.4 Hz, 1H), 6.38 (s, 2H), 3.88, 3.65 (AB, *J* = 11.6 Hz, 2H), 2.90 (s, 3H), 2.08 (s, 6H); <sup>13</sup>C NMR (100 MHz, CDCl<sub>3</sub>): δ 174.24, 143.25, 137.01, 135.88, 132.24, 129.89, 129.72, 128.72, 128.65, 128.23, 125.35, 124.32, 123.00, 121.93, 121.15, 120.09, 111.33, 108.24, 102.66, 68.05, 43.56, 26.00, 21.07; IR (neat): 2920, 2860, 1720, 1610, 1516, 1508, 1490, 1469, 1126, 1018, 702, 690, 538; HRMS (ESI): Exact mass calcd for C<sub>26</sub>H<sub>24</sub>N<sub>2</sub>ONa [M+Na]<sup>+</sup>: 403.1781, Found: 403.1790.



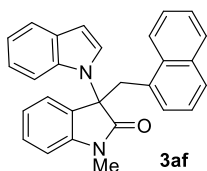

Product **3af** was obtained in 85% yield as yellow solid; Mp: 190-192 °C; <sup>1</sup>H NMR (400 MHz, CDCl<sub>3</sub>): δ 7.98-7.96 (m, 1H), 7.83 (d, *J* = 3.2 Hz, 1H), 7.72-7.69 (m, 1H), 7.63 (d, *J* = 7.6 Hz, 2H), 7.37-7.35 (m, 2H), 7.15 (dd, *J*<sub>1</sub> = 14.0 Hz, *J*<sub>2</sub> = 7.6 Hz, 2H), 7.07-7.01 (m, 3H), 6.91-6.85 (m, 2H), 6.71 (d, *J* = 2.8 Hz, 1H), 6.43 (dd, *J*<sub>1</sub> = 18.0 Hz, *J*<sub>2</sub> = 8.4 Hz, 2H), 4.49, 4.36 (AB, *J* = 12.4 Hz, 2H), 2.74 (s, 3H); <sup>13</sup>C NMR (100 MHz, CDCl<sub>3</sub>): δ 174.77, 142.92, 135.95, 133.40, 132.26, 129.98, 129.73, 128.98, 128.93, 128.35, 128.20, 128.17, 125.56, 125.41, 124.93, 124.43, 124.21, 122.85, 121.99, 121.21, 120.14, 111.51, 108.09, 102.89, 68.16, 38.77, 25.93; IR (neat): 2933, 1720, 1612, 1514, 1490, 1469, 1454, 1126, 1089, 1016, 702, 692; HRMS (ESI): Exact mass calcd for C<sub>28</sub>H<sub>22</sub>N<sub>2</sub>ONa [M+Na]<sup>+</sup>: 425.1624, Found: 425.1631.

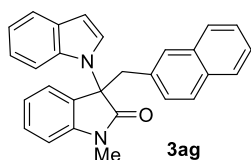

Product **3ag** was obtained in 83% yield as yellow solid; Mp: 208-210 °C; <sup>1</sup>H NMR (400 MHz, CDCl<sub>3</sub>): δ 7.71-7.68 (m, 2H), 7.61-7.57 (m, 2H), 7.49 (d, *J* = 8.4 Hz, 1H), 7.39-7.37 (m, 2H), 7.26 (s, 1H), 7.20-7.16 (m, 2H), 7.01 (t, *J* = 7.6 Hz, 2H), 6.90-6.86 (m, 2H), 6.66 (d, *J* = 3.2 Hz, 1H), 6.50 (d, *J* = 8.4 Hz, 1H), 6.43 (d, *J* = 7.6 Hz, 1H), 4.11, 3.87 (AB, *J* = 11.6 Hz, 2H), 2.77 (s, 3H); <sup>13</sup>C NMR (100 MHz, CDCl<sub>3</sub>): δ 174.20, 143.06, 135.84, 132.93, 132.43, 130.03, 129.92, 129.45, 128.30, 127.76, 127.51, 126.97, 125.97, 125.94, 125.31, 124.29, 123.18, 122.00, 121.19, 120.14, 111.30, 108.46, 102.79, 68.02, 43.63, 26.02; IR (neat): 2931, 1720, 1612, 1508, 1490, 1469, 1456, 1124, 1083, 1016, 1001, 734, 692; HRMS (ESI): Exact mass calcd for C<sub>28</sub>H<sub>22</sub>N<sub>2</sub>ONa [M+Na]<sup>+</sup>: 425.1624, Found: 425.1634.

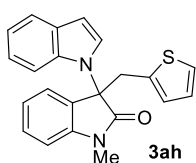

Product **3ah** was obtained in 61% yield as yellow solid; Mp: 178-180 °C; <sup>1</sup>H NMR (400 MHz, CDCl<sub>3</sub>): δ 7.61-7.60 (m, 2H), 7.36 (t, *J* = 7.6 Hz, 1H), 7.13-7.02 (m, 4H), 6.94 (t, *J* = 7.7 Hz, 1H), 6.79-6.76 (m, 2H), 6.66-6.64 (m, 2H), 6.61 (d, *J* = 3.2 Hz, 1H), 4.19, 4.04 (AB, *J* = 13.2 Hz, 2H), 3.05 (s, 3H); <sup>13</sup>C NMR (100 MHz, CDCl<sub>3</sub>): δ 174.03, 143.73, 135.90, 133.99, 130.31, 129.98, 128.35, 128.17, 126.31, 125.48, 125.36, 124.63, 123.40, 122.08, 121.21, 120.21, 111.58, 108.61, 102.92, 67.50, 37.58, 26.30; IR (neat): 2924, 1716, 1610, 1492, 1469, 1456, 1311, 1236, 1122, 1018, 732, 692; HRMS (ESI): Exact mass calcd for C<sub>22</sub>H<sub>18</sub>N<sub>2</sub>OSNa [M+Na]<sup>+</sup>: 381.1032, Found: 381.1039.

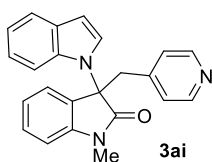

Product **3ai** was obtained in 60% yield as white solid; Mp: 200-202 °C;  $^1\text{H}$  NMR (400 MHz,  $\text{CDCl}_3$ ):  $\delta$  8.30 (d,  $J = 4.8$  Hz, 2H), 7.62-7.59 (m, 2H), 7.30 (t,  $J = 7.6$  Hz, 1H), 7.16 (d,  $J = 7.2$  Hz, 1H), 7.05 (dd,  $J_1 = 15.2$  Hz,  $J_2 = 7.6$  Hz, 2H), 6.91 (t,  $J = 8.0$  Hz, 1H), 6.72 (d,  $J = 4.8$  Hz, 2H), 6.66-6.63 (m, 2H), 6.51 (d,  $J = 8.4$  Hz, 1H), 3.96, 3.73 (AB,  $J = 11.2$  Hz, 2H), 2.95 (s, 3H);  $^{13}\text{C}$  NMR (100 MHz,  $\text{CDCl}_3$ ):  $\delta$  173.64, 149.18, 142.95, 141.86, 135.68, 130.44, 129.93, 127.51, 125.45, 125.02, 124.29, 123.52, 122.20, 121.31, 120.32, 111.18, 108.76, 103.12, 67.36, 42.77, 26.08; IR (neat): 2929, 1716, 1612, 1600, 1490, 1469, 1456, 1313, 1234, 1126, 736, 692; HRMS (ESI): Exact mass calcd for  $\text{C}_{23}\text{H}_{19}\text{N}_3\text{ONa}$   $[\text{M}+\text{Na}]^+$ : 376.1420, Found: 376.1423.

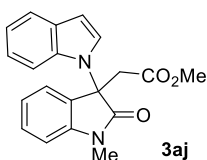

Product **3aj** was obtained in 37% yield as yellow solid; Mp: 110-112 °C;  $^1\text{H}$  NMR (400 MHz,  $\text{CDCl}_3$ ):  $\delta$  7.56 (d,  $J = 7.2$  Hz, 1H), 7.45 (td,  $J_1 = 8.0$  Hz,  $J_2 = 1.2$  Hz, 1H), 7.34 (dd,  $J_1 = 7.2$  Hz,  $J_2 = 0.8$  Hz, 1H), 7.28 (d,  $J = 3.6$  Hz, 1H), 7.10 (td,  $J_1 = 7.6$  Hz,  $J_2 = 0.8$  Hz, 1H), 7.04-6.96 (m, 3H), 6.87 (dd,  $J_1 = 8.4$  Hz,  $J_2 = 0.4$  Hz, 1H), 6.54 (dd,  $J_1 = 3.2$  Hz,  $J_2 = 0.8$  Hz, 1H), 3.83, 3.60 (AB,  $J = 15.2$  Hz, 2H), 3.51 (s, 3H), 3.30 (s, 3H);  $^{13}\text{C}$  NMR (100 MHz,  $\text{CDCl}_3$ ):  $\delta$  173.92, 168.58, 144.52, 135.60, 130.82, 130.30, 127.34, 125.85, 125.31, 123.30, 122.11, 121.32, 120.27, 112.18, 109.02, 102.96, 64.05, 52.15, 41.23, 26.77; IR (neat): 2920, 2848, 1724, 1612, 1492, 1469, 1454, 1238, 1199, 1128, 1087, 1018, 738; HRMS (ESI): Exact mass calcd for  $\text{C}_{20}\text{H}_{18}\text{N}_2\text{O}_3\text{Na}$   $[\text{M}+\text{Na}]^+$ : 357.1210, Found: 357.1205.

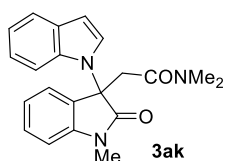

Product **3ak** was obtained in 27% yield as yellow solid; Mp: 66-68 °C;  $^1\text{H}$  NMR (400 MHz,  $\text{CDCl}_3$ ):  $\delta$  7.58-7.56 (m, 1H), 7.44-7.35 (m, 3H), 7.15 (d,  $J = 3.2$  Hz, 1H), 7.11-7.04 (m, 3H), 6.95 (d,  $J = 8.0$  Hz, 1H), 6.47 (d,  $J = 3.2$  Hz, 1H), 4.01, 3.59 (AB,  $J = 16.0$  Hz, 2H), 3.27 (s, 3H), 2.98 (s, 3H), 2.80 (s, 3H);  $^{13}\text{C}$  NMR (100 MHz,  $\text{CDCl}_3$ ):  $\delta$  174.59, 167.46, 145.22, 135.55, 130.44, 130.40, 128.19, 126.34, 124.82, 122.61, 121.89, 121.29, 120.08, 113.23, 108.99, 102.29, 64.97, 39.48, 37.56, 35.57, 26.73; IR (neat): 2929, 1722, 1647, 1610, 1492, 1469, 1452, 1165, 1147, 1126, 1087, 731; HRMS (ESI): Exact mass calcd for  $\text{C}_{21}\text{H}_{21}\text{N}_3\text{O}_2\text{Na}$   $[\text{M}+\text{Na}]^+$ : 370.1526, Found: 370.1527.

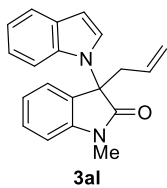

Product **3al** was obtained in 65% yield as yellow solid; Mp: 80-82 °C;  $^1\text{H}$  NMR (400 MHz,  $\text{CDCl}_3$ ):  $\delta$  7.57 (d,  $J = 8.0$  Hz, 2H), 7.41 (t,  $J = 7.6$  Hz, 1H), 7.14 (d,  $J = 7.6$  Hz, 1H), 7.08-6.98 (m, 3H), 6.89 (t,  $J = 7.6$  Hz, 1H), 6.60 (d,  $J = 2.8$  Hz, 1H), 6.46 (d,  $J = 8.4$  Hz, 1H), 5.51-5.40 (m, 1H),  $\delta$  5.15 (d,  $J = 17.2$  Hz, 1H), 5.07 (d,  $J = 10.0$  Hz, 1H), 3.37-3.25 (m, 5H);  $^{13}\text{C}$  NMR (100 MHz,  $\text{CDCl}_3$ ):  $\delta$  174.53, 143.27, 135.78, 129.99, 129.94, 129.61, 128.65, 125.60, 124.42, 123.41, 121.94, 121.24, 121.14, 120.07, 111.19, 108.70, 102.70, 66.41, 41.58, 26.45; IR (neat): 2918, 1720, 1610, 1490, 1469, 1456, 1369, 1234, 1078, 1018, 736, 692; HRMS (ESI): Exact mass calcd for  $\text{C}_{20}\text{H}_{18}\text{N}_2\text{O}_2\text{Na}$   $[\text{M}]^+$ : 325.1311, Found: 325.1310.

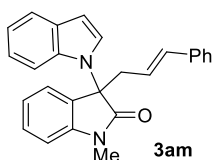

Product **3am** was obtained in 83% yield as yellow solid; Mp: 100-102 °C;  $^1\text{H}$  NMR (400 MHz,  $\text{CDCl}_3$ ):  $\delta$  7.60-7.57 (m, 2H), 7.39 (t,  $J = 7.6$  Hz, 1H), 7.26-7.19 (m, 3H), 7.15-7.14 (m, 3H), 7.08-6.89 (m, 2H), 6.95-6.89 (m, 2H), 6.62 (d,  $J = 2.8$  Hz, 1H), 6.48-6.42 (m, 2H), 5.83-5.76 (m, 1H), 3.49 (dd,  $J_1 = 12.8$  Hz,  $J_2 = 6.4$  Hz, 1H), 3.37 (dd,  $J_1 = 12.4$  Hz,  $J_2 = 8.4$  Hz, 1H), 3.23 (s, 3H);  $^{13}\text{C}$  NMR (100 MHz,  $\text{CDCl}_3$ ):  $\delta$  174.57, 143.19, 136.83, 135.97, 135.86, 130.09, 129.95, 128.69, 128.63, 127.78, 126.33, 125.66, 124.48, 123.47, 121.98, 121.18, 120.81, 120.12, 111.23, 108.76, 102.83, 66.80, 40.75, 26.53; IR (neat): 1722, 1612, 1471, 1456, 1265, 1128, 968, 731, 692, 538; HRMS (ESI): Exact mass calcd for  $\text{C}_{26}\text{H}_{22}\text{N}_2\text{O}_2\text{Na}$   $[\text{M}+\text{Na}]^+$ : 401.1624, Found: 401.1632.

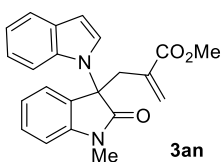

Product **3an** was obtained in 85% yield as yellow solid; Mp: 133-135 °C;  $^1\text{H}$  NMR (400 MHz,  $\text{CDCl}_3$ ):  $\delta$  7.58-7.56 (m, 2H), 7.36 (td,  $J_1 = 8.0$  Hz,  $J_2 = 1.2$  Hz, 1H), 7.13 (dd,  $J_1 = 7.2$  Hz,  $J_2 = 0.8$  Hz, 1H), 7.12-7.00 (m, 2H), 6.92-6.89 (m, 2H), 6.61 (dd,  $J_1 = 3.6$  Hz,  $J_2 = 0.8$  Hz, 1H), 6.48 (dd,  $J_1 = 8.4$  Hz,  $J_2 = 0.8$  Hz, 1H), 6.04 (s, 1H), 5.57 (d,  $J = 0.8$  Hz, 1H), 3.97, 3.55 (AB,  $J = 15.2$  Hz, 2H), 3.44 (s, 3H), 3.26 (s, 3H);  $^{13}\text{C}$  NMR (100 MHz,  $\text{CDCl}_3$ ):  $\delta$  174.26, 166.98, 143.36, 135.69, 133.83, 130.28, 129.99, 129.42, 126.87, 126.04, 125.43, 123.03, 122.03, 121.23, 120.17, 111.23, 108.71, 102.85, 67.10, 51.91, 37.84, 26.35; IR (neat): 2949, 2931, 1720, 1612, 1516, 1492, 1471, 1456, 1319, 1234, 1126, 1082, 738; HRMS (ESI): Exact mass calcd for  $\text{C}_{22}\text{H}_{20}\text{N}_2\text{O}_3\text{Na}$   $[\text{M}+\text{Na}]^+$ : 383.1366, Found: 383.1371.

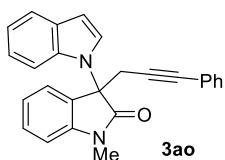

Product **3ao** was obtained in 84% yield as yellow oil;  $^1\text{H}$  NMR (400 MHz,

$\text{CDCl}_3$ ):  $\delta$  7.68 (d,  $J = 3.2$  Hz, 1H), 7.58 (d,  $J = 8.0$  Hz, 1H), 7.46 (t,  $J = 7.6$

Hz, 1H), 7.39 (d,  $J = 7.6$  Hz, 1H), 7.26-7.25 (m, 5H), 7.10 (t,  $J = 7.6$  Hz, 1H),

7.05-7.00 (m, 2H), 6.90 (t,  $J = 7.6$  Hz, 1H), 6.63 (d,  $J = 2.4$  Hz, 1H), 6.42 (d,  $J = 8.4$  Hz, 1H),

3.78 (d,  $J = 16.4$  Hz, 1H), 3.34-3.30 (m, 4H);  $^{13}\text{C}$  NMR (100 MHz,  $\text{CDCl}_3$ ):  $\delta$  174.18, 143.26,

135.79, 131.70, 130.40, 130.01, 128.45, 128.39, 126.32, 125.20, 123.58, 122.79, 122.06, 121.20,

120.20, 111.05, 108.81, 102.91, 84.92, 82.75, 65.39, 29.20, 26.75; IR (neat): 2933, 1724, 1612,

1490, 1469, 1456, 1369, 1315, 754, 738; HRMS (ESI): Exact mass calcd for  $\text{C}_{26}\text{H}_{20}\text{N}_2\text{ONa}$

$[\text{M}+\text{Na}]^+$ : 399.1468, Found: 399.1476.

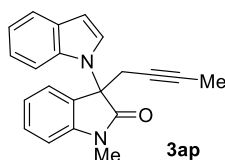

Product **3ap** was obtained in 64% yield as yellow solid; Mp: 138-140  $^\circ\text{C}$ ;  $^1\text{H}$

NMR (400 MHz,  $\text{CDCl}_3$ ):  $\delta$  7.66 (d,  $J = 3.2$  Hz, 1H), 7.58 (d,  $J = 7.6$  Hz, 1H),

7.46 (t,  $J = 8.0$  Hz, 1H), 7.35 (d,  $J = 7.2$  Hz, 1H), 7.10 (t,  $J = 7.6$  Hz, 1H), 7.02

(t,  $J = 7.6$  Hz, 2H), 6.88 (t,  $J = 7.6$  Hz, 1H), 6.62 (d,  $J = 2.8$  Hz, 1H), 6.35 (d,  $J = 8.4$  Hz, 1H),

3.51 (d,  $J = 16.4$  Hz, 1H), 3.33 (s, 3H), 3.01 (d,  $J = 16.8$  Hz, 1H), 1.75 (s, 3H);  $^{13}\text{C}$  NMR (100

MHz,  $\text{CDCl}_3$ ):  $\delta$  174.35, 143.09, 135.75, 130.22, 129.94, 128.59, 126.52, 125.14, 123.42, 121.94,

121.11, 120.08, 110.95, 108.70, 102.66, 80.71, 72.10, 65.26, 28.57, 26.67, 3.59; IR (neat): 2920,

1722, 1612, 1471, 1456, 1369, 1265, 1074, 731, 702, 536; HRMS (ESI): Exact mass calcd for

$\text{C}_{21}\text{H}_{18}\text{N}_2\text{ONa}$   $[\text{M}+\text{Na}]^+$ : 337.1311, Found: 337.1305.

## 5. General procedure for one-pot tandem sequence of keto esters.

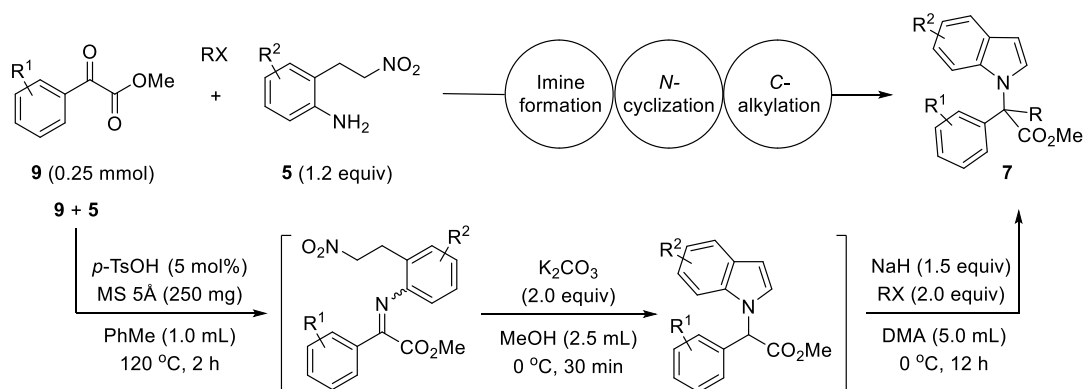

To a 25-mL Schlenk reaction tube were added  $\alpha$ -ketoester **9** (0.25 mmol, 1.0 equiv), aniline derivatives **5** (0.3 mmol, 1.2 equiv), MS 5Å (250.0 mg) and anhydrous toluene (1.0 mL), followed by the addition of  $p$ -TsOH (2.2 mg, 5 mol%). The reaction mixture was stirred at 120 °C for 2 h, and then cooled down to room temperature for concentration under vacuum. The thus obtained residue was dissolved in anhydrous MeOH (2.5 mL), followed by the addition of  $K_2CO_3$  (69.1 mg, 0.5 mmol) at 0 °C. The resulting mixture was stirred at 0 °C for 30 min, concentrated in vacuum, and then the residue was dissolved in anhydrous DMA (5.0 mL), followed by the addition of alkyl iodides (0.5 mmol, 2.0 equiv) or alkyl bromides (0.5 mmol, 2.0 equiv) and NaH (15.0 mg, 0.375 mmol) at 0 °C. The resulting mixture was stirred at 0 °C for 12 h, and then quenched with saturated aqueous  $NH_4Cl$  (5 mL) and extracted with EtOAc ( $3 \times 10$  mL). The combined organic layers were washed with water ( $3 \times 20$  mL) and brine (20 mL), then dried over anhydrous  $Na_2SO_4$  and concentrated. The resulting residue was purified by column chromatography (PE/EtOAc, 20/1, v/v) to afford the desired product **7a-7t**.

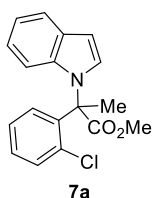

Product **7a** was obtained in 85% yield as white solid; Mp: 93-95 °C;  $^1H$  NMR (400 MHz,  $CDCl_3$ ):  $\delta$  7.63 (d,  $J = 8.0$  Hz, 1H), 7.46-7.43 (m, 2H), 7.27 (td,  $J_1 = 7.6$  Hz,  $J_2 = 1.6$  Hz, 1H), 7.14-6.98 (m, 4H), 6.77 (dd,  $J_1 = 8.0$  Hz,  $J_2 = 1.6$  Hz, 1H), 6.64 (dd,  $J_1 = 3.6$  Hz,  $J_2 = 0.8$  Hz, 1H), 3.71 (s, 3H), 2.37 (s, 3H);  $^{13}C$  NMR (100 MHz,  $CDCl_3$ ):  $\delta$  169.97, 138.12, 136.04, 132.44, 131.54, 130.24, 129.37, 128.91, 127.02, 125.90, 121.40, 120.93, 120.06, 115.33, 103.07, 68.15, 52.88, 25.57; IR (neat): 2951, 2922, 1739, 1517, 1471, 1452, 1292, 1230, 1112, 1091, 1018, 763, 742; HRMS (ESI): Exact mass calcd for  $C_{18}H_{16}ClNO_2Na$   $[M+Na]^+$ : 336.0762, Found: 336.0760.

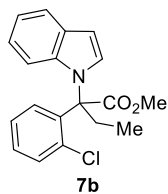

Product **7b** was obtained in 74% yield as yellow oil;  $^1\text{H}$  NMR (400 MHz,  $\text{CDCl}_3$ ):  $\delta$  7.61-7.59 (m, 1H), 7.51 (d,  $J = 3.6$  Hz, 1H), 7.44 (dd,  $J_1 = 8.0$  Hz,  $J_2 = 1.2$  Hz, 1H), 7.29 (td,  $J_1 = 8.4$  Hz,  $J_2 = 2.0$  Hz, 1H), 7.16 (td,  $J_1 = 8.0$  Hz,  $J_2 = 1.6$  Hz, 1H), 7.06 (td,  $J_1 = 7.6$  Hz,  $J_2 = 1.2$  Hz, 2H), 6.94-6.91 (m, 2H), 6.63 (dd,  $J_1 = 3.6$  Hz,  $J_2 = 0.8$  Hz, 1H), 3.64 (s, 3H), 3.04-2.98 (m, 1H), 2.92-2.86 (m, 1H), 0.81 (t,  $J = 7.2$  Hz, 3H);  $^{13}\text{C}$  NMR (100 MHz,  $\text{CDCl}_3$ ):  $\delta$  169.93, 135.87, 135.22, 132.73, 131.48, 131.13, 130.10, 129.34, 126.86, 126.16, 121.17, 120.78, 119.99, 115.59, 103.13, 71.31, 52.64, 28.13, 8.98; IR (neat): 2949, 1737, 1508, 1471, 1452, 1433, 1192, 1180, 1018, 1004, 734, 688; HRMS (ESI): Exact mass calcd for  $\text{C}_{19}\text{H}_{18}\text{ClNO}_2\text{Na}$   $[\text{M}+\text{Na}]^+$ : 350.0918, Found: 350.0917.

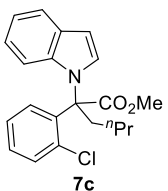

Product **7c** was obtained in 62% yield as yellow oil;  $^1\text{H}$  NMR (400 MHz,  $\text{CDCl}_3$ ):  $\delta$  7.60-7.58 (m, 1H), 7.46 (d,  $J = 3.6$  Hz, 1H), 7.43 (dd,  $J_1 = 8.0$  Hz,  $J_2 = 1.2$  Hz, 1H), 7.28 (td,  $J_1 = 7.2$  Hz,  $J_2 = 1.6$  Hz, 1H), 7.15 (td,  $J_1 = 8.0$  Hz,  $J_2 = 1.2$  Hz, 1H), 7.06-7.03 (m, 2H), 6.94-6.91 (m, 2H), 6.62 (dd,  $J_1 = 3.6$  Hz,  $J_2 = 0.4$  Hz, 1H), 3.64 (s, 3H), 2.91-2.87 (m, 2H), 1.35-1.27 (m, 3H), 0.88-0.84 (m, 4H);  $^{13}\text{C}$  NMR (100 MHz,  $\text{CDCl}_3$ ):  $\delta$  169.90, 135.92, 135.53, 132.70, 131.44, 130.94, 130.10, 129.30, 126.73, 126.19, 121.18, 120.79, 119.99, 115.60, 103.16, 70.97, 52.64, 34.73, 26.43, 22.81, 13.96; IR (neat): 2929, 1737, 1519, 1469, 1452, 1431, 1193, 1180, 1053, 1018, 763, 738; HRMS (ESI): Exact mass calcd for  $\text{C}_{21}\text{H}_{22}\text{ClNO}_2\text{Na}$   $[\text{M}+\text{Na}]^+$ : 378.1231, Found: 378.1238.

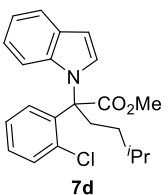

Product **7d** was obtained in 65% yield as yellow solid; Mp: 83-85  $^\circ\text{C}$ ;  $^1\text{H}$  NMR (400 MHz,  $\text{CDCl}_3$ ):  $\delta$  7.60 (d,  $J = 8.0$  Hz, 1H), 7.48 (d,  $J = 3.6$  Hz, 1H), 7.44 (dd,  $J_1 = 8.0$  Hz,  $J_2 = 0.8$  Hz, 1H), 7.29 (td,  $J_1 = 7.6$  Hz,  $J_2 = 1.6$  Hz, 1H), 7.15-7.13 (m, 1H), 7.06-7.03 (m, 2H), 6.95-6.92 (m, 2H), 6.63 (d,  $J = 3.6$  Hz, 1H), 3.64 (s, 3H), 2.94-2.87 (m, 2H), 1.62-1.50 (m, 1H), 1.31-1.25 (m, 1H), 0.91 (d,  $J = 6.8$  Hz, 3H), 0.84 (d,  $J = 6.8$  Hz, 3H), 0.76-0.74 (m, 1H);  $^{13}\text{C}$  NMR (100 MHz,  $\text{CDCl}_3$ ):  $\delta$  169.92, 135.94, 135.46, 132.67, 131.44, 131.03, 130.11, 129.30, 126.73, 126.15, 121.17, 120.79, 120.00, 115.65, 103.17, 71.04, 52.64, 33.08, 32.92, 28.38, 22.71, 22.40; IR (neat): 2954, 2927, 1737, 1469, 1452, 1431, 1195, 1180, 1055, 1047, 1018, 734, 704; HRMS (ESI): Exact mass calcd for  $\text{C}_{22}\text{H}_{24}\text{ClNO}_2\text{Na}$   $[\text{M}+\text{Na}]^+$ : 392.1388, Found: 392.1396.

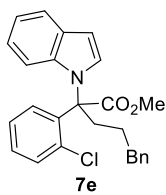

Product **7e** was obtained in 76% yield as yellow oil;  $^1\text{H}$  NMR (400 MHz,  $\text{CDCl}_3$ ):  $\delta$  7.57 (d,  $J = 7.6$  Hz, 1H), 7.41 (dd,  $J_1 = 8.0$  Hz,  $J_2 = 1.2$  Hz, 1H), 7.28-7.26 (m, 2H), 7.24-7.17 (m, 2H), 7.18-7.10 (m, 2H), 7.09-6.99 (m, 4H), 6.92-6.88 (m, 2H), 6.56 (dd,  $J_1 = 3.6$  Hz,  $J_2 = 0.8$  Hz, 1H), 3.60 (s, 3H), 2.94-2.87 (m, 2H), 2.59 (t,  $J = 7.6$  Hz, 2H), 1.67-1.64 (m, 1H), 1.28-1.22 (m, 1H);  $^{13}\text{C}$  NMR (100 MHz,  $\text{CDCl}_3$ ):  $\delta$  169.79, 141.39, 135.89, 135.36, 132.73, 131.48, 130.91, 130.10, 129.40, 128.54, 128.53, 126.63, 126.27, 126.16, 121.21, 120.81, 120.02, 115.57, 103.22, 70.88, 52.66, 35.66, 34.29, 25.93; IR (neat): 2922, 1737, 1517, 1469, 1452, 1431, 1195, 1178, 1037, 1018, 734, 698; HRMS (ESI): Exact mass calcd for  $\text{C}_{26}\text{H}_{24}\text{ClNO}_2\text{Na}$   $[\text{M}+\text{Na}]^+$ : 440.1388, Found: 440.1398.

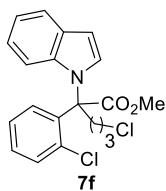

Product **7f** was obtained in 53% yield as yellow solid; Mp: 98-100 °C;  $^1\text{H}$  NMR (400 MHz,  $\text{CDCl}_3$ ):  $\delta$  7.60 (d,  $J = 7.6$  Hz, 1H), 7.53 (d,  $J = 3.6$  Hz, 1H), 7.45 (dd,  $J_1 = 8.0$  Hz,  $J_2 = 1.6$  Hz, 1H), 7.31 (td,  $J_1 = 7.2$  Hz,  $J_2 = 1.6$  Hz, 1H), 7.17 (td,  $J_1 = 8.0$  Hz,  $J_2 = 1.2$  Hz, 1H), 7.07-7.03 (m, 2H), 6.95-6.93 (m, 1H), 6.91-6.90 (m, 1H), 6.64 (dd,  $J_1 = 3.6$  Hz,  $J_2 = 0.8$  Hz, 1H), 3.66 (s, 3H), 3.55-3.51 (m, 1H), 3.49-3.46 (m, 1H), 3.23-3.13 (m, 1H), 3.03-2.92 (m, 1H), 1.84-1.81 (m, 1H), 1.42-1.36 (m, 1H);  $^{13}\text{C}$  NMR (100 MHz,  $\text{CDCl}_3$ ):  $\delta$  169.58, 135.89, 135.17, 132.73, 131.66, 130.73, 130.14, 129.65, 126.56, 126.45, 121.35, 120.92, 120.16, 115.54, 103.56, 70.51, 52.83, 44.74, 32.72, 27.61; IR (neat): 2951, 2920, 1735, 1519, 1469, 1452, 1431, 1197, 1180, 1089, 1018, 763, 736; HRMS (ESI): Exact mass calcd for  $\text{C}_{20}\text{H}_{19}\text{Cl}_2\text{NO}_2\text{Na}$   $[\text{M}+\text{Na}]^+$ : 398.0685, Found: 398.0694.

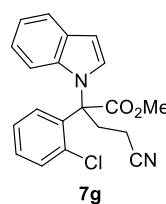

Product **7g** was obtained in 50% yield as white solid; Mp: 58-60 °C;  $^1\text{H}$  NMR (400 MHz,  $\text{CDCl}_3$ ):  $\delta$  7.62 (d,  $J = 7.6$  Hz, 1H), 7.47 (dd,  $J_1 = 8.0$  Hz,  $J_2 = 1.2$  Hz, 1H), 7.36 (td,  $J_1 = 7.6$  Hz,  $J_2 = 1.6$  Hz, 1H), 7.32 (d,  $J = 3.6$  Hz, 1H), 7.23 (td,  $J_1 = 8.0$  Hz,  $J_2 = 1.6$  Hz, 1H), 7.13-7.04 (m, 2H), 7.01-6.95 (m, 1H), 6.84 (dd,  $J_1 = 8.4$  Hz,  $J_2 = 0.4$  Hz, 1H), 6.66 (dd,  $J_1 = 3.2$  Hz,  $J_2 = 0.4$  Hz, 1H), 3.71 (s, 3H), 3.46-3.36 (m, 1H), 3.30-3.20 (m, 1H), 2.45-2.35 (m, 1H), 2.08-1.97 (m, 1H);  $^{13}\text{C}$  NMR (100 MHz,  $\text{CDCl}_3$ ):  $\delta$  169.22, 135.78, 134.02, 132.90, 132.15, 130.39, 130.30, 130.09, 127.01, 125.95, 121.97, 121.31, 120.58, 118.59, 114.80, 104.22, 69.99, 53.26, 31.55, 13.20; IR (neat): 2954, 2254, 1737, 1452, 1433, 1265, 763; HRMS (ESI): Exact mass calcd for  $\text{C}_{20}\text{H}_{17}\text{ClN}_2\text{O}_2\text{Na}$   $[\text{M}+\text{Na}]^+$ : 375.0871, Found: 375.0874.

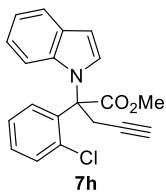

Product **7h** was obtained in 65% yield as yellow solid; Mp: 102-104 °C; <sup>1</sup>H NMR (400 MHz, CDCl<sub>3</sub>): δ 7.64 (d, *J* = 3.6 Hz, 1H), 7.61 (d, *J* = 8.0 Hz, 1H), 7.47 (dd, *J*<sub>1</sub> = 8.0 Hz, *J*<sub>2</sub> = 1.2 Hz, 1H), 7.32 (td, *J*<sub>1</sub> = 7.2 Hz, *J*<sub>2</sub> = 1.2 Hz, 1H), 7.14 (td, *J*<sub>1</sub> = 8.0 Hz, *J*<sub>2</sub> = 1.6 Hz, 1H), 7.11-7.06 (m, 1H), 7.03-6.96 (m, 3H), 6.66 (d, *J* = 3.2 Hz, 1H), 3.94, 3.77 (ABd, *J*<sub>1</sub> = 18.0 Hz, *J*<sub>2</sub> = 2.4 Hz, 2H), 3.67 (s, 3H), 1.93 (t, *J* = 2.4 Hz, 1H); <sup>13</sup>C NMR (100 MHz, CDCl<sub>3</sub>): δ 168.53, 135.71, 134.33, 132.17, 131.73, 131.12, 130.24, 129.85, 127.06, 126.18, 121.37, 120.89, 120.26, 115.70, 103.44, 78.35, 73.64, 69.86, 52.98, 27.41; IR (neat): 2951, 1735, 1508, 1471, 1454, 1431, 1242, 1193, 1058, 1047, 1020, 734, 690; HRMS (ESI): Exact mass calcd for C<sub>20</sub>H<sub>16</sub>ClNO<sub>2</sub>Na [M+Na]<sup>+</sup>: 360.0762, Found: 360.0765.

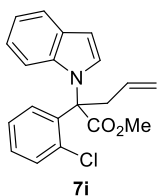

Product **7i** was obtained in 70% yield as yellow oil; <sup>1</sup>H NMR (400 MHz, CDCl<sub>3</sub>): δ 7.61-7.57 (m, 2H), 7.43 (dd, *J*<sub>1</sub> = 8.0 Hz, *J*<sub>2</sub> = 1.2 Hz, 1H), 7.30-7.26 (m, 1H), 7.15 (td, *J*<sub>1</sub> = 8.0 Hz, *J*<sub>2</sub> = 1.6 Hz, 1H), 7.09-7.04 (m, 1H), 7.00 (dd, *J*<sub>1</sub> = 8.0 Hz, *J*<sub>2</sub> = 1.6 Hz, 1H), 6.98-6.89 (m, 2H), 6.62-6.61 (m, 1H), 5.59-5.52 (m, 1H), 5.11-5.06 (m, 1H), 5.01-4.98 (m, 1H), 3.82-3.73 (m, 1H), 3.67-3.62 (m, 4H); <sup>13</sup>C NMR (100 MHz, CDCl<sub>3</sub>): δ 169.47, 135.96, 135.20, 132.77, 131.90, 131.49, 131.00, 130.12, 129.49, 127.00, 126.27, 121.26, 120.85, 120.12, 119.70, 115.50, 103.21, 70.66, 52.76, 39.70; IR (neat): 2953, 1737, 1473, 1454, 1433, 1265, 1020, 731, 702; HRMS (ESI): Exact mass calcd for C<sub>20</sub>H<sub>18</sub>ClNO<sub>2</sub>Na [M+Na]<sup>+</sup>: 362.0918, Found: 362.0919.

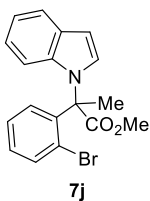

Product **7j** was obtained in 80% yield as white solid; Mp: 127-128 °C; <sup>1</sup>H NMR (400 MHz, CDCl<sub>3</sub>): δ 7.65-7.61 (m, 2H), 7.46 (d, *J* = 3.6 Hz, 1H), 7.18-7.16 (m, 2H), 7.08-7.06 (m, 1H), 6.99-6.96 (m, 2H), 6.82-6.80 (m, 1H), 6.64 (dd, *J*<sub>1</sub> = 3.6 Hz, *J*<sub>2</sub> = 0.4 Hz, 1H), 3.71 (s, 3H), 2.39 (s, 3H); <sup>13</sup>C NMR (100 MHz, CDCl<sub>3</sub>): δ 169.91, 139.43, 136.05, 135.21, 130.25, 129.52, 129.21, 127.59, 125.99, 121.88, 121.37, 120.90, 120.06, 115.40, 103.13, 69.21, 52.90, 25.80; IR (neat): 2949, 1737, 1517, 1467, 1452, 1429, 1193, 1111, 1089, 1039, 1018, 761, 740; HRMS (ESI): Exact mass calcd for C<sub>18</sub>H<sub>16</sub>BrNO<sub>2</sub>Na [M+Na]<sup>+</sup>: 380.0257, Found: 380.0257.



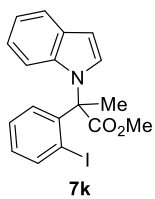

Product **7k** was obtained in 75% yield as yellow solid; Mp: 160-162 °C; <sup>1</sup>H NMR (400 MHz, CDCl<sub>3</sub>): δ 7.97 (dd, *J*<sub>1</sub> = 8.0 Hz, *J*<sub>2</sub> = 1.2 Hz, 1H), 7.61 (d, *J* = 7.6 Hz, 1H), 7.46 (d, *J* = 3.6 Hz, 1H), 7.29-7.22 (m, 1H), 7.09-7.04 (m, 1H), 6.99 (td, *J*<sub>1</sub> = 7.6 Hz, *J*<sub>2</sub> = 1.6 Hz, 1H), 6.96-6.88 (m, 2H), 6.85 (dd, *J*<sub>1</sub> = 8.4 Hz, *J*<sub>2</sub> = 0.8 Hz, 1H), 6.64 (dd, *J*<sub>1</sub> = 3.2 Hz, *J*<sub>2</sub> = 0.4 Hz, 1H), 3.71 (s, 3H), 2.39 (s, 3H); <sup>13</sup>C NMR (100 MHz, CDCl<sub>3</sub>): δ 170.10, 142.89, 141.72, 136.22, 130.20, 129.50, 128.82, 128.36, 126.18, 121.37, 120.85, 120.01, 115.14, 103.21, 95.19, 70.58, 52.95, 26.12; IR (neat): 2922, 1735, 1562, 1517, 1508, 1489, 1452, 1193, 1126, 1087, 1008, 761, 740; HRMS (ESI): Exact mass calcd for C<sub>18</sub>H<sub>16</sub>INO<sub>2</sub>Na [M+Na]<sup>+</sup>: 428.0118, Found: 428.0121.

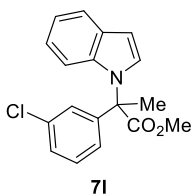

Product **7l** was obtained in 52% yield as yellow oil; <sup>1</sup>H NMR (400 MHz, CDCl<sub>3</sub>): δ 7.65-7.63 (m, 1H), 7.42 (t, *J* = 1.6 Hz, 1H), 7.35-7.31 (m, 1H), 7.26 (t, *J* = 8.0 Hz, 1H), 7.14-7.10 (m, 3H), 7.08-7.04 (m, 1H), 6.78 (dd, *J*<sub>1</sub> = 8.0 Hz, *J*<sub>2</sub> = 0.8 Hz, 1H), 6.58 (dd, *J*<sub>1</sub> = 3.2 Hz, *J*<sub>2</sub> = 0.8 Hz, 1H), 3.74 (s, 3H), 2.19 (s, 3H); <sup>13</sup>C NMR (100 MHz, CDCl<sub>3</sub>): δ 171.86, 142.10, 136.13, 134.66, 129.91, 129.85, 128.66, 127.54, 126.08, 125.41, 121.91, 121.30, 120.09, 112.64, 102.52, 67.14, 53.31, 26.96; IR (neat): 2953, 1737, 1516, 1508, 1475, 1456, 1433, 1263, 1195, 1111, 1072, 763, 702; HRMS (ESI): Exact mass calcd for C<sub>18</sub>H<sub>16</sub>ClNO<sub>2</sub>Na [M+Na]<sup>+</sup>: 336.0762, Found: 336.0767.

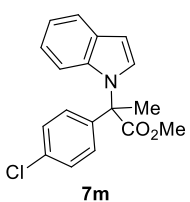

Product **7m** was obtained in 50% yield as yellow solid; Mp: 103-105 °C; <sup>1</sup>H NMR (400 MHz, CDCl<sub>3</sub>): δ 7.63-7.61 (m, 1H), 7.33-7.27 (m, 2H), 7.26-7.20 (m, 2H), 7.13 (d, *J* = 3.2 Hz, 1H), 7.08 (td, *J*<sub>1</sub> = 7.2 Hz, *J*<sub>2</sub> = 1.2 Hz, 1H), 7.05-6.99 (m, 1H), 6.76 (dd, *J*<sub>1</sub> = 8.4 Hz, *J*<sub>2</sub> = 0.8 Hz, 1H), 6.56 (dd, *J*<sub>1</sub> = 3.6 Hz, *J*<sub>2</sub> = 0.8 Hz, 1H), 3.72 (s, 3H), 2.16 (s, 3H); <sup>13</sup>C NMR (100 MHz, CDCl<sub>3</sub>): δ 172.05, 138.60, 136.12, 134.42, 129.85, 128.82, 128.68, 126.07, 121.87, 121.29, 120.07, 112.66, 102.44, 67.06, 53.26, 26.98; IR (neat): 2951, 2918, 1735, 1516, 1492, 1456, 1433, 1195, 1095, 1076, 1012, 765, 713; HRMS (ESI): Exact mass calcd for C<sub>18</sub>H<sub>16</sub>ClNO<sub>2</sub>Na [M+Na]<sup>+</sup>: 336.0762, Found: 336.0767.

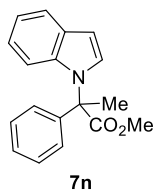

Product **7n** was obtained in 44% yield as yellow solid; Mp: 85-87 °C; <sup>1</sup>H NMR (400 MHz, CDCl<sub>3</sub>): δ 7.65-7.63 (m, 1H), 7.37 (s, 5H), 7.11-7.08 (m, 2H), 7.07-7.03 (m, 1H), 6.82 (dd, *J*<sub>1</sub> = 8.0 Hz, *J*<sub>2</sub> = 0.8 Hz, 1H), 6.55 (dd, *J*<sub>1</sub> = 3.6 Hz, *J*<sub>2</sub> = 0.8 Hz, 1H), 3.75 (s, 3H), 2.21 (s, 3H); <sup>13</sup>C NMR (100 MHz, CDCl<sub>3</sub>): δ 172.40, 139.82, 136.25, 129.87, 128.71, 128.50, 127.22, 126.48, 121.63, 121.19, 119.86, 112.84, 102.06, 67.55, 53.13, 26.49; IR (neat): 2951, 2922, 1735, 1514, 1494, 1473, 1454, 1433, 1195, 1107, 1074, 1018, 738, 696; HRMS (ESI): Exact mass calcd for C<sub>18</sub>H<sub>17</sub>NO<sub>2</sub>Na [M+Na]<sup>+</sup>: 302.1151, Found: 302.1147.

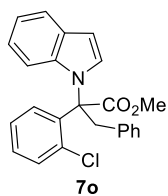

Product **7o** was obtained in 60% yield as yellow solid; Mp: 140-141 °C; <sup>1</sup>H NMR (400 MHz, CDCl<sub>3</sub>): δ 7.79 (d, *J* = 3.6 Hz, 1H), 7.59 (d, *J* = 8.0 Hz, 1H), 7.28-7.22 (m, 3H), 7.15-7.09 (m, 2H), 7.04 (td, *J*<sub>1</sub> = 7.6 Hz, *J*<sub>2</sub> = 1.6 Hz, 3H), 6.87 (t, *J* = 7.6 Hz, 1H), 6.73 (d, *J* = 8.4 Hz, 1H), 6.68 (d, *J* = 7.6 Hz, 2H), 6.55 (d, *J* = 3.6 Hz, 1H), 4.34, 4.04 (AB, *J* = 13.6 Hz, 2H), 3.67 (s, 3H); <sup>13</sup>C NMR (100 MHz, CDCl<sub>3</sub>): δ 169.31, 135.81, 135.45, 134.72, 133.80, 131.59, 130.94, 130.73, 129.92, 129.48, 127.94, 127.70, 127.15, 126.25, 121.11, 120.89, 119.89, 114.21, 102.47, 71.42, 52.80, 42.00; IR (neat): 2922, 1739, 1496, 1473, 1452, 1431, 1288, 1224, 1193, 1176, 1082, 1020, 740, 700; HRMS (ESI): Exact mass calcd for C<sub>24</sub>H<sub>20</sub>ClNO<sub>2</sub>Na [M+Na]<sup>+</sup>: 412.1075, Found: 412.1084.

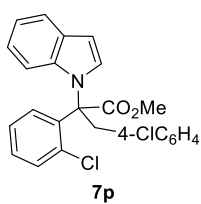

Product **7p** was obtained in 51% yield as white solid; Mp: 151-153 °C; <sup>1</sup>H NMR (400 MHz, CDCl<sub>3</sub>): δ 7.74 (d, *J* = 3.6 Hz, 1H), 7.60 (d, *J* = 7.6 Hz, 1H), 7.29-7.24 (m, 3H), 7.18-7.16 (m, 1H), 7.07-7.02 (m, 3H), 6.93-6.86 (m, 1H), 6.73 (d, *J* = 8.4 Hz, 1H), 6.63 (d, *J* = 8.4 Hz, 2H), 6.57 (d, *J* = 3.6 Hz, 1H), 4.34, 4.00 (AB, *J* = 13.6 Hz, 2H), 3.68 (s, 3H); <sup>13</sup>C NMR (100 MHz, CDCl<sub>3</sub>): δ 169.30, 135.85, 135.26, 133.83, 133.25, 133.21, 132.13, 131.72, 130.85, 129.96, 129.66, 128.07, 127.42, 126.45, 121.25, 120.99, 120.01, 114.24, 102.76, 71.37, 52.84, 41.49; IR (neat): 1743, 1735, 1508, 1490, 1452, 1433, 1274, 1259, 1193, 1016, 763, 748; HRMS (ESI): Exact mass calcd for C<sub>24</sub>H<sub>19</sub>Cl<sub>2</sub>NO<sub>2</sub>Na [M+Na]<sup>+</sup>: 446.0685, Found: 446.0695.

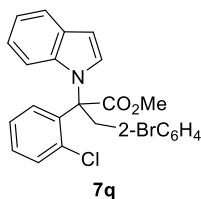

Product **7q** was obtained in 41% yield as white solid; Mp: 150-152 °C; <sup>1</sup>H NMR (400 MHz, CDCl<sub>3</sub>): δ 7.94 (d, *J* = 3.6 Hz, 1H), 7.78-7.71 (m, 1H), 7.61 (d, *J* = 7.6 Hz, 1H), 7.47 (dd, *J*<sub>1</sub> = 8.0 Hz, *J*<sub>2</sub> = 1.2 Hz, 1H), 7.36-7.26 (m, 3H), 7.07-6.99 (m, 2H), 6.96-6.86 (m, 2H), 6.78 (dd, *J*<sub>1</sub> = 8.4 Hz, *J*<sub>2</sub> = 0.4 Hz, 1H), 6.50 (dd, *J*<sub>1</sub> = 3.6 Hz, *J*<sub>2</sub> = 0.4 Hz, 1H), 6.29-6.19 (m, 1H), 4.50, 4.37 (AB, *J* = 14.4 Hz, 2H), 3.71 (s, 3H); <sup>13</sup>C NMR (100 MHz, CDCl<sub>3</sub>): δ 169.01, 136.79, 135.68, 134.64, 134.41, 132.77, 131.80, 131.72, 130.01, 129.93, 129.61, 128.83, 127.12, 126.37, 126.34, 121.26, 121.12, 119.88, 113.23, 101.76, 70.24, 53.20, 40.79; IR (neat): 2951, 1745, 1473, 1452, 1433, 1253, 1197, 1178, 1066, 1022, 758, 738; HRMS (ESI): Exact mass calcd for C<sub>24</sub>H<sub>19</sub>BrClNO<sub>2</sub>Na [M+Na]<sup>+</sup>: 490.0180, Found: 490.0193.

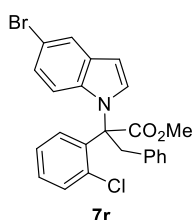

Product **7r** was obtained in 57% yield as yellow solid; Mp: 118-120 °C; <sup>1</sup>H NMR (400 MHz, CDCl<sub>3</sub>): δ 7.80 (d, *J* = 3.6 Hz, 1H), 7.71 (d, *J* = 2.0 Hz, 1H), 7.31-7.26 (m, 3H), 7.20-7.13 (m, 2H), 7.07 (t, *J* = 7.6 Hz, 2H), 6.95 (dd, *J*<sub>1</sub> = 9.2 Hz, *J*<sub>2</sub> = 2.0 Hz, 1H), 6.66 (d, *J* = 7.6 Hz, 2H), 6.58 (d, *J* = 8.8 Hz, 1H), 6.48 (d, *J* = 3.6 Hz, 1H), 4.29, 4.03 (AB, *J* = 13.2 Hz, 2H), 3.70 (s, 3H); <sup>13</sup>C NMR (100 MHz, CDCl<sub>3</sub>): δ 169.10, 135.25, 134.43, 134.40, 133.88, 131.75, 131.62, 130.64, 129.73, 129.07, 128.03, 127.31, 126.45, 123.95, 123.36, 115.30, 113.34, 101.88, 71.43, 52.93, 42.08; IR (neat): 2951, 1739, 1564, 1516, 1508, 1496, 1471, 1446, 1192, 1082, 1056, 1026, 736, 700; HRMS (ESI): Exact mass calcd for C<sub>24</sub>H<sub>19</sub>BrClNO<sub>2</sub>Na [M+Na]<sup>+</sup>: 490.0180, Found: 490.0189.

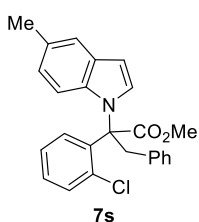

Product **7s** was obtained in 65% yield as yellow solid; Mp: 120-122 °C; <sup>1</sup>H NMR (400 MHz, CDCl<sub>3</sub>): δ 7.78 (d, *J* = 3.6 Hz, 1H), 7.40 (s, 1H), 7.32-7.24 (m, 3H), 7.16-7.13 (m, 2H), 7.09-7.05 (m, 2H), 6.73-6.72 (m, 3H), 6.66-6.64 (m, 1H), 6.51-6.50 (m, 1H), 4.35, 4.06 (AB, *J* = 13.6 Hz, 2H), 3.70 (s, 3H), 2.40 (s, 3H); <sup>13</sup>C NMR (100 MHz, CDCl<sub>3</sub>): δ 169.33, 135.54, 134.78, 134.15, 133.79, 131.52, 130.97, 130.75, 130.22, 129.42, 129.06, 127.91, 127.76, 127.11, 126.20, 122.74, 120.63, 113.89, 102.00, 71.35, 52.74, 41.95, 21.32; IR (neat): 2920, 2856, 1737, 1496, 1471, 1456, 1431, 1225, 1192, 1176, 1082, 1028, 731, 700; HRMS (ESI): Exact mass calcd for C<sub>25</sub>H<sub>22</sub>ClNO<sub>2</sub>Na [M+Na]<sup>+</sup>: 426.1231, Found: 426.1239.

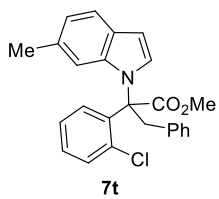

Product **7t** was obtained in 72% yield as white solid; Mp: 60-62 °C;  $^1\text{H}$  NMR (400 MHz,  $\text{CDCl}_3$ ):  $\delta$  7.73 (d,  $J = 3.6$  Hz, 1H), 7.49 (d,  $J = 8.0$  Hz, 1H), 7.32 (td,  $J_1 = 8.0$  Hz,  $J_2 = 1.2$  Hz, 2H), 7.25 (td,  $J_1 = 7.2$  Hz,  $J_2 = 1.6$  Hz, 1H), 7.19-7.12 (m, 2H), 7.09-7.05 (m, 2H), 6.90 (dd,  $J_1 = 8.0$  Hz,  $J_2 = 0.8$  Hz, 1H), 6.72 (d,  $J = 7.2$  Hz, 2H), 6.55 (s, 1H), 6.52 (dd,  $J_1 = 3.6$  Hz,  $J_2 = 0.4$  Hz, 1H), 4.35, 4.08 (AB,  $J = 13.6$  Hz, 2H), 3.71 (s, 3H), 2.23 (s, 3H);  $^{13}\text{C}$  NMR (100 MHz,  $\text{CDCl}_3$ ):  $\delta$  169.31, 136.25, 135.57, 134.83, 133.81, 131.58, 130.97, 130.72, 130.60, 129.40, 127.91, 127.75, 127.25, 127.11, 126.15, 121.64, 120.40, 114.23, 102.20, 71.37, 52.77, 41.97, 22.13; IR (neat): 2920, 1737, 1516, 1496, 1471, 1456, 1433, 1192, 1176, 1082, 752, 700; HRMS (ESI): Exact mass calcd for  $\text{C}_{25}\text{H}_{22}\text{ClNO}_2\text{Na}$   $[\text{M}]^+$ : 426.1231, Found: 426.1243.

## 6. Product transformation

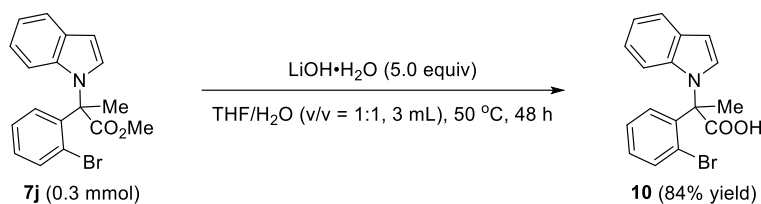

To a solution of methyl 2-(2-bromophenyl)-2-(1H-indol-1-yl)propanoate **7j** (107.5 mg, 0.3 mmol) in THF/H<sub>2</sub>O (v/v = 1:1, 3 mL) was added LiOH·H<sub>2</sub>O (63.0 mg, 1.5 mmol). The reaction mixture was stirred at 50 °C for 48 h, and then cooled down to room temperature, acidified with HCl (2 M, 10 mL) and extracted with EtOAc (3 × 10 mL). The combined organic layers were dried over anhydrous Na<sub>2</sub>SO<sub>4</sub> and concentrated. The resulting residue was purified by column chromatography (CH<sub>2</sub>Cl<sub>2</sub>/MeOH, 20/1, v/v) to afford the title compound **10** in 84% yield as white solid; Mp: 186-188 °C; <sup>1</sup>H NMR (400 MHz, CDCl<sub>3</sub>): δ 7.64-7.61 (m, 2H), 7.44 (d, *J* = 3.6 Hz, 1H), 7.20-7.18 (m, 2H), 7.09-7.06 (m, 1H), 6.97-6.90 (m, 3H), 6.60-6.65 (m, 1H), 2.38 (s, 3H); <sup>13</sup>C NMR (100 MHz, CDCl<sub>3</sub>): δ 174.55, 138.56, 136.02, 135.34, 130.18, 129.70, 129.18, 127.61, 125.89, 121.94, 121.49, 120.93, 120.18, 115.36, 103.39, 69.12, 25.42; IR (neat): 2922, 1708, 1608, 1517, 1467, 1452, 1230, 1193, 1114, 1089, 1020, 738; HRMS (ESI): Exact mass calcd for C<sub>17</sub>H<sub>14</sub>BrNO<sub>2</sub>Na [M+Na]<sup>+</sup>: 366.0100, Found: 366.0091.

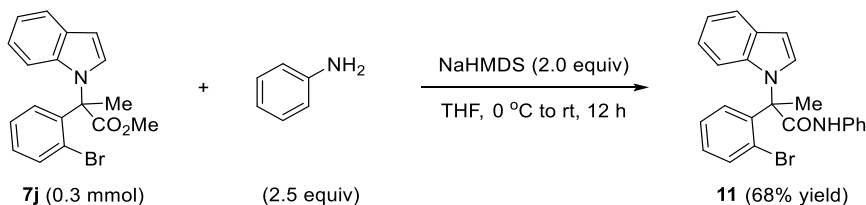

To a solution of PhNH<sub>2</sub> (69.8 mg, 0.75 mmol) in dry THF (2 mL) was added NaHMDS (0.6 mL, 1.0 M in THF, 0.6 mmol) dropwise at 0 °C. Then the reaction mixture was stirred for 20 min before methyl 2-(2-bromophenyl)-2-(1H-indol-1-yl)propanoate **7j** (107.5 mg, 0.3 mmol) in THF (1 mL) was added dropwise. The resulting mixture was allowed to warm to room temperature and stirred for 12 h, and then quenched with saturated aqueous NH<sub>4</sub>Cl solution (10 mL) and extracted with EtOAc (3 × 10 mL). The combined organic layers were dried over anhydrous Na<sub>2</sub>SO<sub>4</sub> and concentrated. The resulting residue was purified by column chromatography (PE/EtOAc, 20/1, v/v) to afford the title compound **11** in 68% yield as yellow solid; Mp: 78-80 °C; <sup>1</sup>H NMR (400 MHz, CDCl<sub>3</sub>): δ 7.75 (dd, *J*<sub>1</sub> = 8.0 Hz, *J*<sub>2</sub> = 1.2 Hz, 1H), 7.67 (d, *J* = 8.0 Hz, 1H), 7.55 (dd, *J*<sub>1</sub> =

7.6 Hz,  $J_2 = 1.2$  Hz, 1H), 7.47 (s, 1H), 7.43 (d,  $J = 3.6$  Hz, 1H), 7.41-7.36 (m, 1H), 7.25-7.21 (m, 5H), 7.11-7.09 (m, 2H), 6.97-6.91 (m, 1H), 6.71 (dd,  $J_1 = 3.6$  Hz,  $J_2 = 0.8$  Hz, 1H), 6.57 (dd,  $J_1 = 8.4$  Hz,  $J_2 = 0.8$  Hz, 1H), 2.56 (s, 3H);  $^{13}\text{C}$  NMR (100 MHz,  $\text{CDCl}_3$ ):  $\delta$  169.39, 138.52, 137.13, 136.44, 135.70, 130.42, 129.97, 129.72, 129.10, 128.09, 126.88, 125.10, 122.67, 122.56, 121.80, 120.71, 120.33, 112.11, 103.93, 71.08, 25.12; IR (neat): 2924, 1683, 1597, 1498, 1465, 1440, 1313, 1242, 1138, 1078, 1020, 752, 692; HRMS (ESI): Exact mass calcd for  $\text{C}_{23}\text{H}_{19}\text{BrN}_2\text{ONa}$   $[\text{M}+\text{Na}]^+$ : 441.0573, Found: 441.0580.

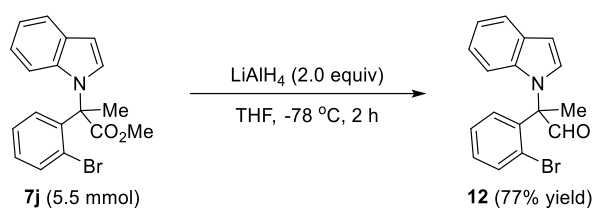

To a solution of methyl 2-(2-bromophenyl)-2-(1H-indol-1-yl)propanoate **7j** (1.97 g, 5.5 mmol) in dry THF (55 mL) was added  $\text{LiAlH}_4$  (418.0 mg, 11.0 mmol) at  $-78$  °C. The reaction mixture was stirred at  $-78$  °C for 2 h, and then quenched with saturated aqueous  $\text{NH}_4\text{Cl}$  solution (20 mL), extracted with EtOAc ( $2 \times 30$  mL), dried over anhydrous  $\text{Na}_2\text{SO}_4$  and concentrated. The resulting residue was purified by column chromatography (PE/EtOAc, 20/1, v/v) to afford the aldehyde **12** in 77% yield as yellow oil;  $^1\text{H}$  NMR (400 MHz,  $\text{CDCl}_3$ ):  $\delta$  10.36 (s, 1H), 7.66-7.64 (m, 2H), 7.32-7.25 (m, 3H), 7.10-7.06 (m, 2H), 7.01-6.94 (m, 1H), 6.78 (dd,  $J_1 = 8.4$  Hz,  $J_2 = 0.8$  Hz, 1H), 6.66 (dd,  $J_1 = 3.2$  Hz,  $J_2 = 0.4$  Hz, 1H), 2.18 (s, 3H);  $^{13}\text{C}$  NMR (100 MHz,  $\text{CDCl}_3$ ):  $\delta$  194.30, 138.40, 135.44, 130.30, 130.26, 129.41, 128.32, 125.39, 121.89, 121.55, 121.24, 120.35, 112.69, 103.66, 70.47, 22.10; IR (neat): 1726, 1516, 1452, 1427, 1292, 1265, 1234, 1022, 731, 702; HRMS (ESI): Exact mass calcd for  $\text{C}_{17}\text{H}_{14}\text{BrNONa}$   $[\text{M}+\text{Na}]^+$ : 350.0151, Found: 350.0145.

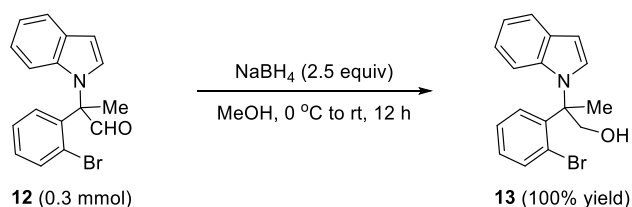

To a solution of methyl 2-(2-bromophenyl)-2-(1H-indol-1-yl)propanal **12** (98.5 mg, 0.3 mmol) in dry MeOH (3 mL) was added  $\text{NaBH}_4$  (28.4 mg, 0.75 mmol) at  $0$  °C. The reaction mixture was then allowed to warm to room temperature and stirred for 12 h before saturated aqueous solution of  $\text{NH}_4\text{Cl}$  (10 mL) was added. The aqueous layer was separated and extracted with EtOAc ( $3 \times 10$

mL). The combined organic layers were dried over anhydrous Na<sub>2</sub>SO<sub>4</sub> and concentrated. The resulting residue was purified by column chromatography (PE/EtOAc, 5/1, v/v) to afford the title compound **13** in 100% yield as yellow oil; <sup>1</sup>H NMR (400 MHz, CDCl<sub>3</sub>): δ 7.61 (d, *J* = 8.0 Hz, 1H), 7.52 (td, *J*<sub>1</sub> = 8.0 Hz, *J*<sub>2</sub> = 1.6 Hz, 2H), 7.46-7.41 (m, 2H), 7.17 (td, *J*<sub>1</sub> = 8.0 Hz, *J*<sub>2</sub> = 1.6 Hz, 1H), 7.04-7.00 (m, 1H), 6.86-6.82 (m, 1H), 6.59 (dd, *J*<sub>1</sub> = 3.2 Hz, *J*<sub>2</sub> = 0.8 Hz, 1H), 6.52 (dd, *J*<sub>1</sub> = 8.4 Hz, *J*<sub>2</sub> = 0.4 Hz, 1H), 4.52 (d, *J* = 11.2 Hz, 1H), 4.32-4.30 (m, 1H), 2.15 (s, 3H); <sup>13</sup>C NMR (100 MHz, CDCl<sub>3</sub>): δ 140.76, 136.30, 135.19, 129.98, 129.27, 127.96, 127.76, 127.17, 122.51, 121.21, 121.13, 119.65, 111.90, 101.69, 68.03, 64.41, 23.65; IR (neat): 3502, 2981, 2887, 1512, 1473, 1454, 1055, 1037, 1018, 734; HRMS (ESI): Exact mass calcd for C<sub>17</sub>H<sub>16</sub>BrNONa [M+Na]<sup>+</sup>: 352.0307, Found: 352.0298.

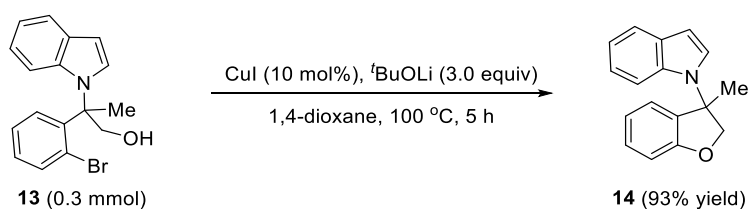

To a 10-mL sealed tube were added 2-(2-bromophenyl)-2-(1H-indol-1-yl)propan-1-ol **13** (99.1 mg, 0.3 mmol), CuI (5.7 mg, 0.03 mmol), <sup>t</sup>BuOLi (72.1 mg, 0.9 mmol) and 1,4-dioxane (3 mL). The reaction mixture was stirred at room temperature for 5 min and then at 100 °C for 5 h, and then filtered through celite and concentrated. The resulting residue was purified by column chromatography (PE/EtOAc, 20/1, v/v) to afford the title compound **14** in 93% yield as yellow solid; Mp: 68-70 °C; <sup>1</sup>H NMR (400 MHz, CDCl<sub>3</sub>): δ 7.65-7.63 (m, 1H), 7.36-7.31 (m, 1H), 7.21-7.18 (m, 2H), 7.11-7.07 (m, 3H), 7.01-6.96 (m, 2H), 6.48 (d, *J* = 3.2 Hz, 1H), 5.04, 4.57 (AB, *J* = 9.6 Hz, 2H), 2.14 (s, 3H); <sup>13</sup>C NMR (100 MHz, CDCl<sub>3</sub>): δ 159.77, 134.67, 130.52, 130.13, 126.03, 124.48, 121.55, 121.43, 121.39, 119.78, 112.05, 110.97, 101.22, 81.76, 65.69, 27.30; IR (neat): 2933, 1598, 1479, 1454, 1244, 1220, 1199, 1178, 1149, 1107, 736, 711; HRMS (ESI): Exact mass calcd for C<sub>17</sub>H<sub>15</sub>NONa [M+Na]<sup>+</sup>: 272.1046, Found: 272.1049.

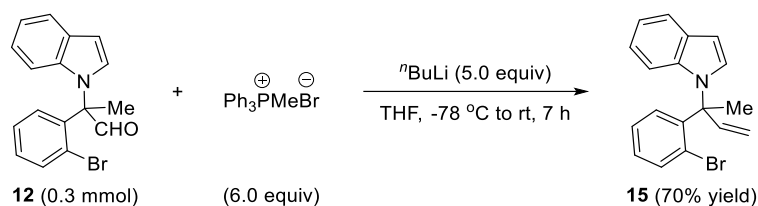

To a solution of methyltriphenylphosphonium bromide (643.0 mg, 1.8 mmol) in dry THF (2 mL) was added *n*BuLi (0.6 mL, 2.5 M in hexane, 1.5 mmol) dropwise at -78 °C, and then allowed to warm to room temperature and stirred for 1 h before aldehyde **12** (98.5 mg, 0.3 mmol) in THF (1 mL) was added dropwise at -78 °C. The resulting mixture was allowed to warm to room temperature and stirred for 7 h, and then quenched with saturated aqueous NH<sub>4</sub>Cl solution (10 mL) and extracted with EtOAc (3 × 10 mL). The combined organic layers were dried over anhydrous Na<sub>2</sub>SO<sub>4</sub> and concentrated. The resulting residue was purified by column chromatography (PE/EtOAc, 20/1, v/v) to afford the title compound **15** in 70% yield as yellow oil; <sup>1</sup>H NMR (400 MHz, CDCl<sub>3</sub>): δ 7.64 (dd, *J*<sub>1</sub> = 8.0 Hz, *J*<sub>2</sub> = 1.6 Hz, 1H), 7.61 (d, *J* = 8.0 Hz, 1H), 7.52 (dd, *J*<sub>1</sub> = 8.0 Hz, *J*<sub>2</sub> = 1.6 Hz, 1H), 7.42-7.38 (m, 2H), 7.17 (td, *J*<sub>1</sub> = 7.6 Hz, *J*<sub>2</sub> = 1.6 Hz, 1H), 7.04-7.00 (m, 1H), 6.88-6.81 (m, 2H), 6.58-6.55 (m, 2H), 5.31 (d, *J* = 10.8 Hz, 1H), 5.08 (d, *J* = 17.2 Hz, 1H), 2.23 (s, 3H); <sup>13</sup>C NMR (100 MHz, CDCl<sub>3</sub>): δ 141.81, 140.15, 136.23, 135.42, 129.92, 129.27, 128.77, 127.83, 126.31, 122.58, 121.05, 120.99, 119.34, 115.32, 112.24, 101.49, 65.03, 25.42; IR (neat): 2987, 1512, 1467, 1454, 1425, 1292, 1263, 1230, 1018, 732, 702; HRMS (ESI): Exact mass calcd for C<sub>18</sub>H<sub>16</sub>BrNNa [M+Na]<sup>+</sup>: 348.0358, Found: 348.0351.

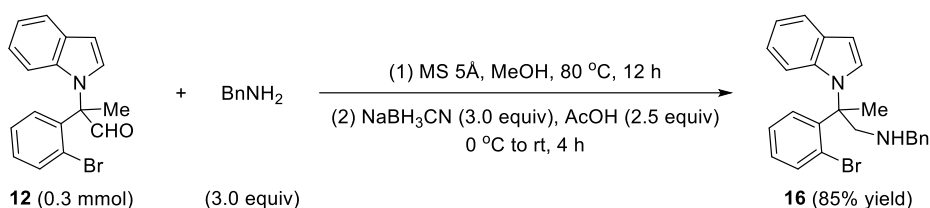

To a solution of methyl 2-(2-bromophenyl)-2-(1H-indol-1-yl)propanal **12** (98.5 mg, 0.3 mmol) in dry MeOH (3 mL) were added BnNH<sub>2</sub> (96.5 mg, 0.9 mmol) and MS 5 Å (600 mg). The reaction mixture was stirred at 80 °C for 12 h before NaBH<sub>3</sub>CN (56.5 mg, 0.9 mmol) and AcOH (45.1 mg, 0.75 mmol) were added at 0 °C. The resulting mixture was allowed to warm to room temperature and stirred for 4 h, and then quenched with saturated aqueous NaHCO<sub>3</sub> solution (10 mL) and extracted with EtOAc (3 × 10 mL). The combined organic layers were dried over anhydrous Na<sub>2</sub>SO<sub>4</sub> and concentrated. The resulting residue was purified by column chromatography



(PE/EtOAc, 10/1, v/v) to afford the title compound **16** in 85% yield as yellow oil;  $^1\text{H}$  NMR (400 MHz,  $\text{CDCl}_3$ ):  $\delta$  7.59 (d,  $J = 8.0$  Hz, 1H), 7.53 (dd,  $J_1 = 8.0$  Hz,  $J_2 = 1.6$  Hz, 1H), 7.48-7.45 (m, 2H), 7.37 (td,  $J_1 = 7.8$  Hz,  $J_2 = 1.2$  Hz, 1H), 7.25-7.19 (m, 3H), 7.15-7.10 (m, 3H), 7.02-6.98 (m, 1H), 6.81-6.77 (m, 1H), 6.55 (dd,  $J_1 = 3.2$  Hz,  $J_2 = 0.8$  Hz, 1H), 6.49 (dd,  $J_1 = 8.4$  Hz,  $J_2 = 0.4$  Hz, 1H), 3.70-3.64 (m, 3H), 3.48 (d,  $J = 11.2$  Hz, 1H), 2.18 (s, 3H);  $^{13}\text{C}$  NMR (100 MHz,  $\text{CDCl}_3$ ):  $\delta$  141.93, 140.28, 136.19, 135.11, 129.98, 128.99, 128.44, 127.99, 127.88, 127.74, 127.35, 126.99, 122.45, 120.97, 120.90, 119.45, 111.88, 101.12, 63.58, 55.89, 53.75, 25.06; IR (neat): 2981, 1606, 1512, 1494, 1473, 1454, 1363, 1116, 1018, 734, 696; HRMS (ESI): Exact mass calcd for  $\text{C}_{24}\text{H}_{24}\text{BrN}_2$   $[\text{M}+\text{H}]^+$ : 419.1117, Found: 419.1125.

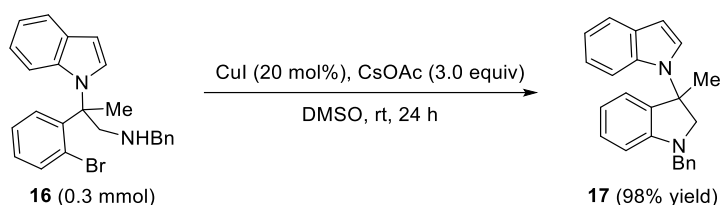

To a solution of *N*-benzyl-2-(2-bromophenyl)-2-(1H-indol-1-yl)propan-1-amine **16** (125.8 mg, 0.3 mmol) in dry DMSO (3 mL) were added CuI (11.4 mg, 0.06 mmol) and CsOAc (115.2 mg, 0.9 mmol). The reaction mixture was stirred at room temperature for 24 h and filtered through celite, then extracted with saturated aqueous NaCl solution (10 mL) and EtOAc ( $3 \times 10$  mL). The organic layers were washed three times with  $\text{H}_2\text{O}$  ( $3 \times 10$  mL), dried over anhydrous  $\text{Na}_2\text{SO}_4$  and concentrated. The resulting residue was purified by column chromatography (PE/EtOAc, 20/1, v/v) to afford the title compound **17** in 98% yield as yellow oil;  $^1\text{H}$  NMR (400 MHz,  $\text{CDCl}_3$ ):  $\delta$  7.60-7.58 (m, 1H), 7.29-7.21 (m, 7H), 7.03-6.94 (m, 4H), 6.72-6.68 (m, 2H), 6.44 (d,  $J = 3.2$  Hz, 1H), 4.49, 4.30 (AB,  $J = 15.2$  Hz, 2H), 3.94, 3.45 (AB,  $J = 9.6$  Hz, 2H), 2.04 (s, 3H);  $^{13}\text{C}$  NMR (100 MHz,  $\text{CDCl}_3$ ):  $\delta$  150.83, 137.85, 134.93, 132.36, 130.49, 129.72, 128.74, 127.94, 127.49, 126.35, 124.15, 121.20, 120.97, 119.40, 118.20, 112.97, 107.95, 100.76, 65.02, 64.44, 52.54, 27.60; IR (neat): 2924, 1606, 1508, 1489, 1473, 1454, 1313, 1292, 1220, 1159, 1026, 1018, 736, 698; HRMS (ESI): Exact mass calcd for  $\text{C}_{24}\text{H}_{22}\text{N}_2\text{Na}$   $[\text{M}+\text{Na}]^+$ : 361.1675, Found: 361.1666.

## 7. X-ray crystallography data of 7o

### Single-Crystal X-ray Crystallography of 7o (CCDC: 2235158)

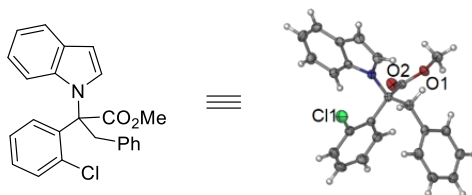

**Table 5 Crystal data and structure refinement for 7o.**

|                                             |                                                               |
|---------------------------------------------|---------------------------------------------------------------|
| Identification code                         | <b>7o</b>                                                     |
| Empirical formula                           | C <sub>24</sub> H <sub>20</sub> ClNO <sub>2</sub>             |
| Formula weight                              | 389.86                                                        |
| Temperature/K                               | 190(20)                                                       |
| Crystal system                              | triclinic                                                     |
| Space group                                 | P-1                                                           |
| a/Å                                         | 6.8922(2)                                                     |
| b/Å                                         | 10.1765(3)                                                    |
| c/Å                                         | 14.9016(4)                                                    |
| α/°                                         | 109.628(2)                                                    |
| β/°                                         | 97.057(2)                                                     |
| γ/°                                         | 93.235(2)                                                     |
| Volume/Å <sup>3</sup>                       | 971.63(5)                                                     |
| Z                                           | 2                                                             |
| ρ <sub>calc</sub> /cm <sup>3</sup>          | 1.333                                                         |
| μ/mm <sup>-1</sup>                          | 1.892                                                         |
| F(000)                                      | 408.0                                                         |
| Crystal size/mm <sup>3</sup>                | 0.32 × 0.25 × 0.12                                            |
| Radiation                                   | Cu Kα (λ = 1.54184)                                           |
| 2θ range for data collection/°              | 6.37 to 134.158                                               |
| Index ranges                                | -8 ≤ h ≤ 8, -11 ≤ k ≤ 12, -17 ≤ l ≤ 17                        |
| Reflections collected                       | 19351                                                         |
| Independent reflections                     | 3432 [R <sub>int</sub> = 0.0370, R <sub>sigma</sub> = 0.0224] |
| Data/restraints/parameters                  | 3432/0/254                                                    |
| Goodness-of-fit on F <sup>2</sup>           | 1.072                                                         |
| Final R indexes [I ≥ 2σ (I)]                | R <sub>1</sub> = 0.0346, wR <sub>2</sub> = 0.0913             |
| Final R indexes [all data]                  | R <sub>1</sub> = 0.0356, wR <sub>2</sub> = 0.0920             |
| Largest diff. peak/hole / e Å <sup>-3</sup> | 0.54/-0.34                                                    |

**Table 6 Fractional Atomic Coordinates ( $\times 10^4$ ) and Equivalent Isotropic Displacement Parameters ( $\text{\AA}^2 \times 10^3$ ) for 7o.  $U_{\text{eq}}$  is defined as 1/3 of the trace of the orthogonalised  $U_{ij}$  tensor.**

| Atom | <i>x</i>   | <i>y</i>   | <i>z</i>   | U(eq)     |
|------|------------|------------|------------|-----------|
| Cl1  | 9635.2(6)  | 1359.6(4)  | 6677.7(3)  | 39.90(14) |
| O1   | 6809.6(14) | 5888.4(11) | 9173.3(7)  | 27.8(2)   |
| O2   | 4282.2(15) | 4558.3(12) | 8118.9(8)  | 36.3(3)   |
| N1   | 7866.4(16) | 2978.8(12) | 8366.2(8)  | 22.3(3)   |
| C7   | 9603.1(19) | 5856.7(15) | 7425.7(10) | 24.4(3)   |
| C15  | 9597.3(19) | 4915.4(15) | 8020.0(10) | 24.0(3)   |
| C2   | 6930.8(19) | 3273.2(15) | 6775.0(10) | 22.8(3)   |
| C13  | 6016.0(19) | 4849.6(15) | 8364.5(10) | 22.7(3)   |
| C17  | 6525(2)    | 1847.0(14) | 8269.1(10) | 22.7(3)   |
| C16  | 7620.6(19) | 4000.1(14) | 7860.2(9)  | 20.8(3)   |
| C22  | 7289(2)    | 1205.3(15) | 8925.9(10) | 26.7(3)   |
| C8   | 8688(2)    | 7091.6(16) | 7657.3(11) | 29.5(3)   |
| C24  | 9416(2)    | 3041.6(16) | 9074.0(11) | 29.0(3)   |
| C18  | 4712(2)    | 1352.9(16) | 7680.5(11) | 28.1(3)   |
| C3   | 5552(2)    | 3848.0(17) | 6285.8(11) | 28.9(3)   |
| C23  | 9119(2)    | 1990.6(17) | 9422.2(11) | 32.0(3)   |
| C12  | 10566(2)   | 5511.4(17) | 6626.0(11) | 32.7(3)   |
| C21  | 6202(2)    | 40.5(16)   | 8989.1(11) | 32.4(3)   |
| C14  | 5412(2)    | 6688.9(17) | 9726.7(12) | 33.8(4)   |
| C6   | 7008(3)    | 1440.0(18) | 5227.9(12) | 37.2(4)   |
| C19  | 3690(2)    | 196.3(17)  | 7761.0(12) | 35.0(4)   |
| C10  | 9671(2)    | 7570.0(17) | 6301.2(12) | 35.2(4)   |
| C20  | 4422(2)    | -452.4(17) | 8406.3(12) | 36.2(4)   |
| C9   | 8707(2)    | 7935.3(17) | 7096.6(12) | 34.1(4)   |
| C1   | 7704(2)    | 2085.3(16) | 6209.4(11) | 28.3(3)   |
| C11  | 10614(3)   | 6360.0(18) | 6071.5(12) | 37.9(4)   |
| C4   | 4887(2)    | 3229.3(19) | 5307.6(12) | 37.5(4)   |
| C5   | 5585(3)    | 2004(2)    | 4784.3(12) | 41.4(4)   |

**Table 7 Anisotropic Displacement Parameters ( $\text{\AA}^2 \times 10^3$ ) for 7o. The Anisotropic displacement factor exponent takes the form:  $-2\pi^2[h^2a^2U_{11}+2hka^*b^*U_{12}+\dots]$ .**

| Atom | $U_{11}$ | $U_{22}$ | $U_{33}$ | $U_{23}$  | $U_{13}$  | $U_{12}$  |
|------|----------|----------|----------|-----------|-----------|-----------|
| C11  | 42.3(2)  | 36.8(2)  | 44.8(2)  | 14.14(18) | 13.94(18) | 21.17(17) |
| O1   | 25.5(5)  | 28.7(5)  | 25.4(5)  | 2.9(4)    | 6.5(4)    | 5.2(4)    |
| O2   | 18.5(5)  | 43.7(7)  | 39.8(6)  | 5.5(5)    | 3.4(4)    | 6.1(5)    |
| N1   | 19.9(6)  | 22.7(6)  | 23.8(6)  | 8.4(5)    | 0.3(4)    | 3.4(4)    |
| C7   | 18.1(6)  | 22.8(7)  | 28.6(7)  | 5.5(6)    | 1.5(5)    | -2.0(5)   |
| C15  | 16.2(6)  | 23.8(7)  | 29.7(7)  | 6.9(6)    | 1.9(5)    | 2.4(5)    |
| C2   | 20.3(6)  | 23.8(7)  | 23.9(7)  | 8.5(6)    | 3.1(5)    | -1.3(5)   |
| C13  | 20.9(7)  | 23.6(7)  | 25.2(7)  | 10.2(6)   | 3.0(5)    | 4.6(5)    |
| C17  | 24.5(7)  | 21.1(7)  | 22.0(7)  | 5.4(5)    | 6.5(5)    | 5.5(5)    |
| C16  | 17.9(6)  | 20.8(7)  | 23.4(7)  | 7.4(5)    | 1.7(5)    | 3.8(5)    |
| C22  | 30.8(7)  | 25.8(7)  | 25.2(7)  | 8.1(6)    | 8.3(6)    | 10.6(6)   |
| C8   | 30.8(8)  | 26.4(8)  | 31.4(8)  | 8.2(6)    | 9.2(6)    | 4.4(6)    |
| C24  | 23.6(7)  | 30.7(8)  | 30.3(8)  | 10.3(6)   | -4.8(6)   | 3.9(6)    |
| C18  | 26.5(7)  | 29.0(8)  | 27.9(7)  | 10.0(6)   | 2.3(6)    | 0.4(6)    |
| C3   | 25.9(7)  | 30.8(8)  | 30.0(8)  | 12.2(6)   | 0.3(6)    | 1.5(6)    |
| C23  | 32.2(8)  | 33.7(9)  | 31.3(8)  | 14.4(7)   | -2.4(6)   | 9.1(6)    |
| C12  | 29.5(8)  | 28.2(8)  | 38.0(8)  | 6.1(7)    | 12.2(6)   | 1.9(6)    |
| C21  | 41.1(9)  | 28.6(8)  | 33.8(8)  | 15.2(7)   | 13.4(7)   | 11.6(7)   |
| C14  | 37.7(9)  | 29.8(8)  | 35.0(8)  | 7.3(7)    | 17.5(7)   | 11.4(7)   |
| C6   | 45.0(9)  | 31.7(9)  | 32.3(8)  | 5.0(7)    | 14.8(7)   | -0.2(7)   |
| C19  | 30.0(8)  | 32.9(9)  | 38.9(9)  | 10.3(7)   | 2.9(7)    | -4.1(6)   |
| C10  | 41.2(9)  | 30.8(8)  | 32.7(8)  | 12.7(7)   | 2.0(7)    | -7.9(7)   |
| C20  | 40.5(9)  | 27.6(8)  | 44.2(9)  | 14.8(7)   | 14.2(7)   | 1.7(7)    |
| C9   | 38.1(9)  | 26.6(8)  | 38.4(9)  | 12.1(7)   | 6.3(7)    | 3.2(6)    |
| C1   | 29.2(8)  | 26.0(8)  | 30.3(8)  | 9.2(6)    | 9.2(6)    | 1.7(6)    |
| C11  | 42.7(9)  | 36.2(9)  | 31.8(8)  | 6.4(7)    | 14.3(7)   | -4.9(7)   |
| C4   | 34.7(8)  | 46.7(10) | 31.1(8)  | 17.0(7)   | -2.5(7)   | -0.3(7)   |
| C5   | 45.7(10) | 48.6(11) | 24.6(8)  | 8.9(7)    | 1.8(7)    | -5.8(8)   |

**Table 8 Bond Lengths for 7o.**

| Atom | Atom | Length/Å   | Atom | Atom | Length/Å |
|------|------|------------|------|------|----------|
| Cl1  | C1   | 1.7414(16) | C17  | C18  | 1.395(2) |
| O1   | C13  | 1.3365(17) | C22  | C23  | 1.427(2) |
| O1   | C14  | 1.4503(17) | C22  | C21  | 1.403(2) |
| O2   | C13  | 1.1956(17) | C8   | C9   | 1.385(2) |
| N1   | C17  | 1.3918(18) | C24  | C23  | 1.352(2) |
| N1   | C16  | 1.4807(17) | C18  | C19  | 1.385(2) |
| N1   | C24  | 1.3883(18) | C3   | C4   | 1.385(2) |
| C7   | C15  | 1.507(2)   | C12  | C11  | 1.383(2) |
| C7   | C8   | 1.396(2)   | C21  | C20  | 1.374(2) |
| C7   | C12  | 1.387(2)   | C6   | C1   | 1.395(2) |
| C15  | C16  | 1.5519(18) | C6   | C5   | 1.374(3) |
| C2   | C16  | 1.5350(18) | C19  | C20  | 1.400(2) |
| C2   | C3   | 1.398(2)   | C10  | C9   | 1.382(2) |
| C2   | C1   | 1.398(2)   | C10  | C11  | 1.385(3) |
| C13  | C16  | 1.5527(18) | C4   | C5   | 1.379(3) |
| C17  | C22  | 1.415(2)   |      |      |          |

**Table 9 Bond Angles for 7o.**

| Atom | Atom | Atom | Angle/°    | Atom | Atom | Atom | Angle/°    |
|------|------|------|------------|------|------|------|------------|
| C13  | O1   | C14  | 115.20(11) | C2   | C16  | C13  | 111.44(11) |
| C17  | N1   | C16  | 126.23(11) | C17  | C22  | C23  | 106.96(13) |
| C24  | N1   | C17  | 107.82(12) | C21  | C22  | C17  | 119.37(14) |
| C24  | N1   | C16  | 125.81(12) | C21  | C22  | C23  | 133.65(14) |
| C8   | C7   | C15  | 122.28(13) | C9   | C8   | C7   | 121.14(14) |
| C12  | C7   | C15  | 119.75(13) | C23  | C24  | N1   | 110.31(13) |
| C12  | C7   | C8   | 117.97(14) | C19  | C18  | C17  | 117.08(14) |
| C7   | C15  | C16  | 114.27(11) | C4   | C3   | C2   | 122.20(15) |
| C3   | C2   | C16  | 120.18(12) | C24  | C23  | C22  | 107.46(13) |
| C1   | C2   | C16  | 123.49(12) | C11  | C12  | C7   | 121.13(15) |
| C1   | C2   | C3   | 116.19(13) | C20  | C21  | C22  | 118.95(15) |
| O1   | C13  | C16  | 111.20(11) | C5   | C6   | C1   | 120.07(15) |
| O2   | C13  | O1   | 123.25(13) | C18  | C19  | C20  | 121.96(15) |
| O2   | C13  | C16  | 125.27(13) | C9   | C10  | C11  | 119.58(15) |
| N1   | C17  | C22  | 107.45(12) | C21  | C20  | C19  | 120.87(15) |
| N1   | C17  | C18  | 130.77(13) | C10  | C9   | C8   | 119.96(15) |
| C18  | C17  | C22  | 121.76(13) | C2   | C1   | C11  | 122.09(11) |
| N1   | C16  | C15  | 109.60(10) | C6   | C1   | C11  | 116.22(12) |

**Table 9 Bond Angles for 7o.**

| Atom | Atom | Atom | Angle/°    | Atom | Atom | Atom | Angle/°    |
|------|------|------|------------|------|------|------|------------|
| N1   | C16  | C2   | 112.00(11) | C6   | C1   | C2   | 121.66(14) |
| N1   | C16  | C13  | 101.60(10) | C12  | C11  | C10  | 120.21(15) |
| C15  | C16  | C13  | 112.67(11) | C5   | C4   | C3   | 119.94(16) |
| C2   | C16  | C15  | 109.37(11) | C6   | C5   | C4   | 119.69(15) |

**Table 10 Torsion Angles for 7o.**

| A   | B   | C   | D   | Angle/°     | A   | B   | C   | D   | Angle/°     |
|-----|-----|-----|-----|-------------|-----|-----|-----|-----|-------------|
| O1  | C13 | C16 | N1  | 85.37(13)   | C22 | C21 | C20 | C19 | -0.3(2)     |
| O1  | C13 | C16 | C15 | -31.81(15)  | C8  | C7  | C15 | C16 | 76.36(17)   |
| O1  | C13 | C16 | C2  | -155.19(11) | C8  | C7  | C12 | C11 | -0.2(2)     |
| O2  | C13 | C16 | N1  | -88.64(16)  | C24 | N1  | C17 | C22 | -0.53(15)   |
| O2  | C13 | C16 | C15 | 154.18(14)  | C24 | N1  | C17 | C18 | 178.18(14)  |
| O2  | C13 | C16 | C2  | 30.79(19)   | C24 | N1  | C16 | C15 | 15.68(18)   |
| N1  | C17 | C22 | C23 | 0.34(15)    | C24 | N1  | C16 | C2  | 137.26(13)  |
| N1  | C17 | C22 | C21 | 178.91(12)  | C24 | N1  | C16 | C13 | -103.70(14) |
| N1  | C17 | C18 | C19 | -178.95(14) | C18 | C17 | C22 | C23 | -178.51(13) |
| N1  | C24 | C23 | C22 | -0.32(18)   | C18 | C17 | C22 | C21 | 0.1(2)      |
| C7  | C15 | C16 | N1  | 171.88(11)  | C18 | C19 | C20 | C21 | 0.0(3)      |
| C7  | C15 | C16 | C2  | 48.74(15)   | C3  | C2  | C16 | N1  | 140.99(13)  |
| C7  | C15 | C16 | C13 | -75.79(15)  | C3  | C2  | C16 | C15 | -97.31(14)  |
| C7  | C8  | C9  | C10 | -1.0(2)     | C3  | C2  | C16 | C13 | 27.93(17)   |
| C7  | C12 | C11 | C10 | -0.8(2)     | C3  | C2  | C1  | C11 | 172.43(11)  |
| C15 | C7  | C8  | C9  | -179.72(14) | C3  | C2  | C1  | C6  | -5.5(2)     |
| C15 | C7  | C12 | C11 | -179.38(14) | C3  | C4  | C5  | C6  | -3.1(3)     |
| C2  | C3  | C4  | C5  | 0.1(2)      | C23 | C22 | C21 | C20 | 178.41(16)  |
| C17 | N1  | C16 | C15 | -169.28(12) | C12 | C7  | C15 | C16 | -104.53(15) |
| C17 | N1  | C16 | C2  | -47.70(17)  | C12 | C7  | C8  | C9  | 1.2(2)      |
| C17 | N1  | C16 | C13 | 71.34(15)   | C21 | C22 | C23 | C24 | -178.29(16) |
| C17 | N1  | C24 | C23 | 0.54(17)    | C14 | O1  | C13 | O2  | -2.2(2)     |
| C17 | C22 | C23 | C24 | -0.02(17)   | C14 | O1  | C13 | C16 | -176.39(11) |
| C17 | C22 | C21 | C20 | 0.3(2)      | C9  | C10 | C11 | C12 | 1.0(2)      |
| C17 | C18 | C19 | C20 | 0.4(2)      | C1  | C2  | C16 | N1  | -43.45(17)  |
| C16 | N1  | C17 | C22 | -176.31(12) | C1  | C2  | C16 | C15 | 78.25(16)   |
| C16 | N1  | C17 | C18 | 2.4(2)      | C1  | C2  | C16 | C13 | -156.51(13) |
| C16 | N1  | C24 | C23 | 176.34(13)  | C1  | C2  | C3  | C4  | 4.1(2)      |
| C16 | C2  | C3  | C4  | 180.00(14)  | C1  | C6  | C5  | C4  | 1.7(3)      |
| C16 | C2  | C1  | C11 | -3.3(2)     | C11 | C10 | C9  | C8  | -0.1(2)     |

**Table 10 Torsion Angles for 7o.**

| A   | B   | C   | D   | Angle/°    | A  | B  | C  | D   | Angle/°     |
|-----|-----|-----|-----|------------|----|----|----|-----|-------------|
| C16 | C2  | C1  | C6  | 178.73(14) | C5 | C6 | C1 | C11 | -175.29(13) |
| C22 | C17 | C18 | C19 | -0.4(2)    | C5 | C6 | C1 | C2  | 2.8(2)      |

**Table 11 Hydrogen Atom Coordinates ( $\text{\AA} \times 10^4$ ) and Isotropic Displacement Parameters ( $\text{\AA}^2 \times 10^3$ ) for 7o.**

| Atom | x        | y        | z        | U(eq) |
|------|----------|----------|----------|-------|
| H15A | 9911.97  | 5503.59  | 8710.19  | 29    |
| H15B | 10650.62 | 4289.84  | 7865.42  | 29    |
| H8   | 8040.02  | 7358.08  | 8208.86  | 35    |
| H24  | 10526.5  | 3725.34  | 9283.81  | 35    |
| H18  | 4201.15  | 1790.7   | 7243.59  | 34    |
| H3   | 5055.15  | 4691.25  | 6636.27  | 35    |
| H23  | 9972.82  | 1808.48  | 9908.09  | 38    |
| H12  | 11204.36 | 4677.57  | 6456.18  | 39    |
| H21  | 6689.46  | -400.62  | 9428.1   | 39    |
| H14A | 4625.95  | 7127.09  | 9333.73  | 51    |
| H14B | 6122.57  | 7418.22  | 10306.07 | 51    |
| H14C | 4544.62  | 6062.28  | 9914.4   | 51    |
| H6   | 7518.25  | 609.65   | 4866.07  | 45    |
| H19  | 2454.57  | -167.75  | 7366.67  | 42    |
| H10  | 9686.63  | 8145.27  | 5914.37  | 42    |
| H20  | 3678.8   | -1243.79 | 8441.5   | 43    |
| H9   | 8058.58  | 8764.55  | 7258.73  | 41    |
| H11  | 11296.33 | 6112.18  | 5531.32  | 45    |
| H4   | 3950.91  | 3648.63  | 4997.52  | 45    |
| H5   | 5084.9   | 1552.45  | 4120.14  | 50    |

## 8. References

1. B.-X. Tang, R.-J. Song, C.-Y. Wu, Y. Liu, M.-B. Zhou, W.-T. Wei, G.-B. Deng, D.-L. Yin and J.-H. Li, *J. Am. Chem. Soc.*, 2010, **132**, 8900–8902.
2. D. Zetschok, L. Heieck and H. Wennemers, *Org. Lett.*, 2021, **23**, 1753–1757.
3. Q. Gui, F. Dai, J. Liu, P. Chen, Z. Yang, X. Chen and Z. Tan, *Org. Biomol. Chem.*, 2014, **12**, 3349–3353.
4. W. Zhuang, J. Zhang, C. Ma, J. S. Wright, X. Zhang, S.-F. Ni and Q. Huang, *Org. Lett.*, 2022, **24**, 4229–4233.
5. Y. Ferandin, K. Bettayeb, M. Kritsanida, O. Lozach, P. Polychronopoulos, P. Magiatis, A.-L. Skaltsounis and L. Meijer, *J. Med. Chem.*, 2006, **49**, 4638–4649.
6. Y.-H. Wang, J.-S. Tian, P.-W. Tan, Q. Cao, X.-X. Zhang, Z.-Y. Cao, F. Zhou, X. Wang and J. Zhou, *Angew. Chem., Int. Ed.*, 2020, **59**, 1634–1643.
7. Z. Zhang, J. Su, Z. Zha and Z. Wang, *Chem. Eur. J.*, 2013, **19**, 17711–17714.
8. A. Veerareddy, S. Gogireddy and P. K. Dubey, *J. Heterocyclic Chem.*, 2014, **51**, 1311–1321.
9. R. Liu, Q. Liu, H. Meng, H. Ding, J. Hao, Z. Ji, H. Yue and W. Wei, *Org. Chem. Front.*, 2021, **8**, 1970–1975.
10. M.-M. Wang and J. Waser, *Angew. Chem., Int. Ed.*, 2019, **58**, 13880–13884.



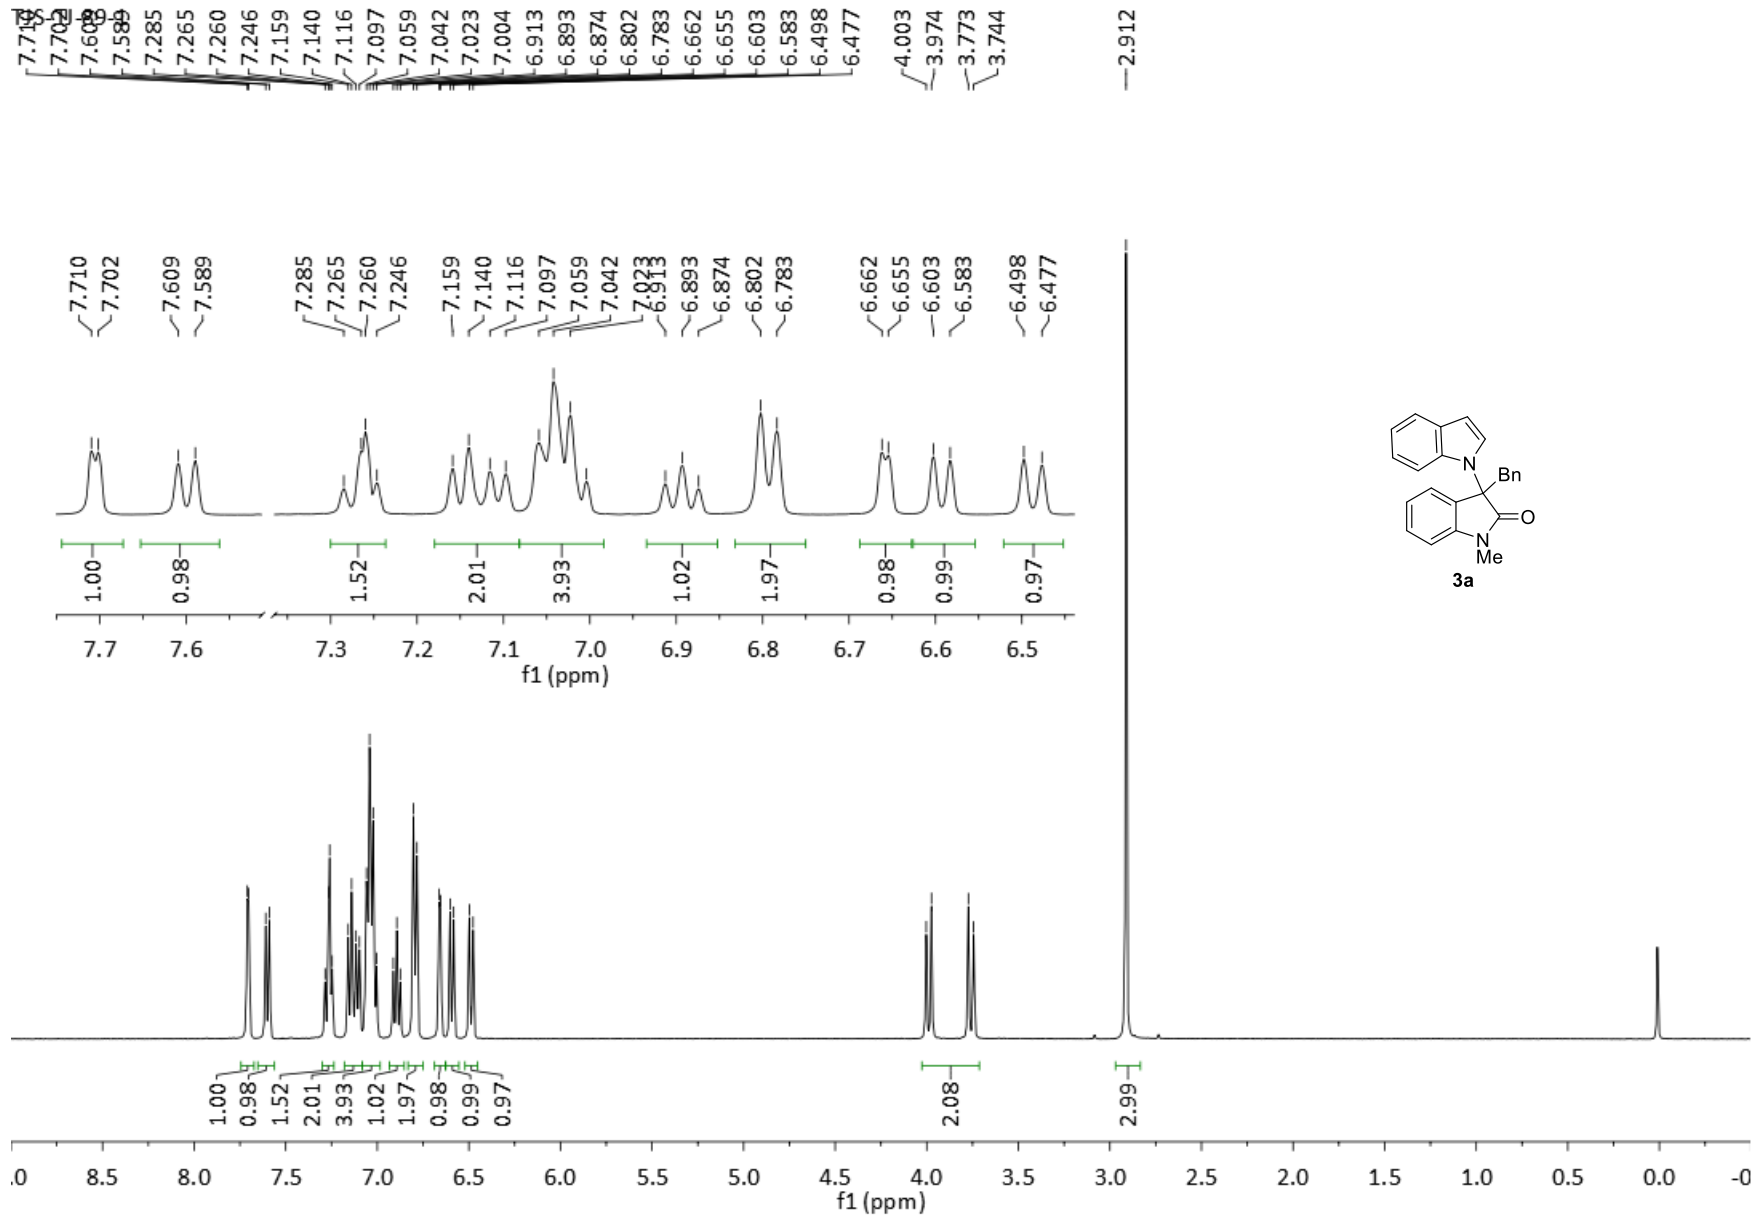

TJS-TJ-89-1

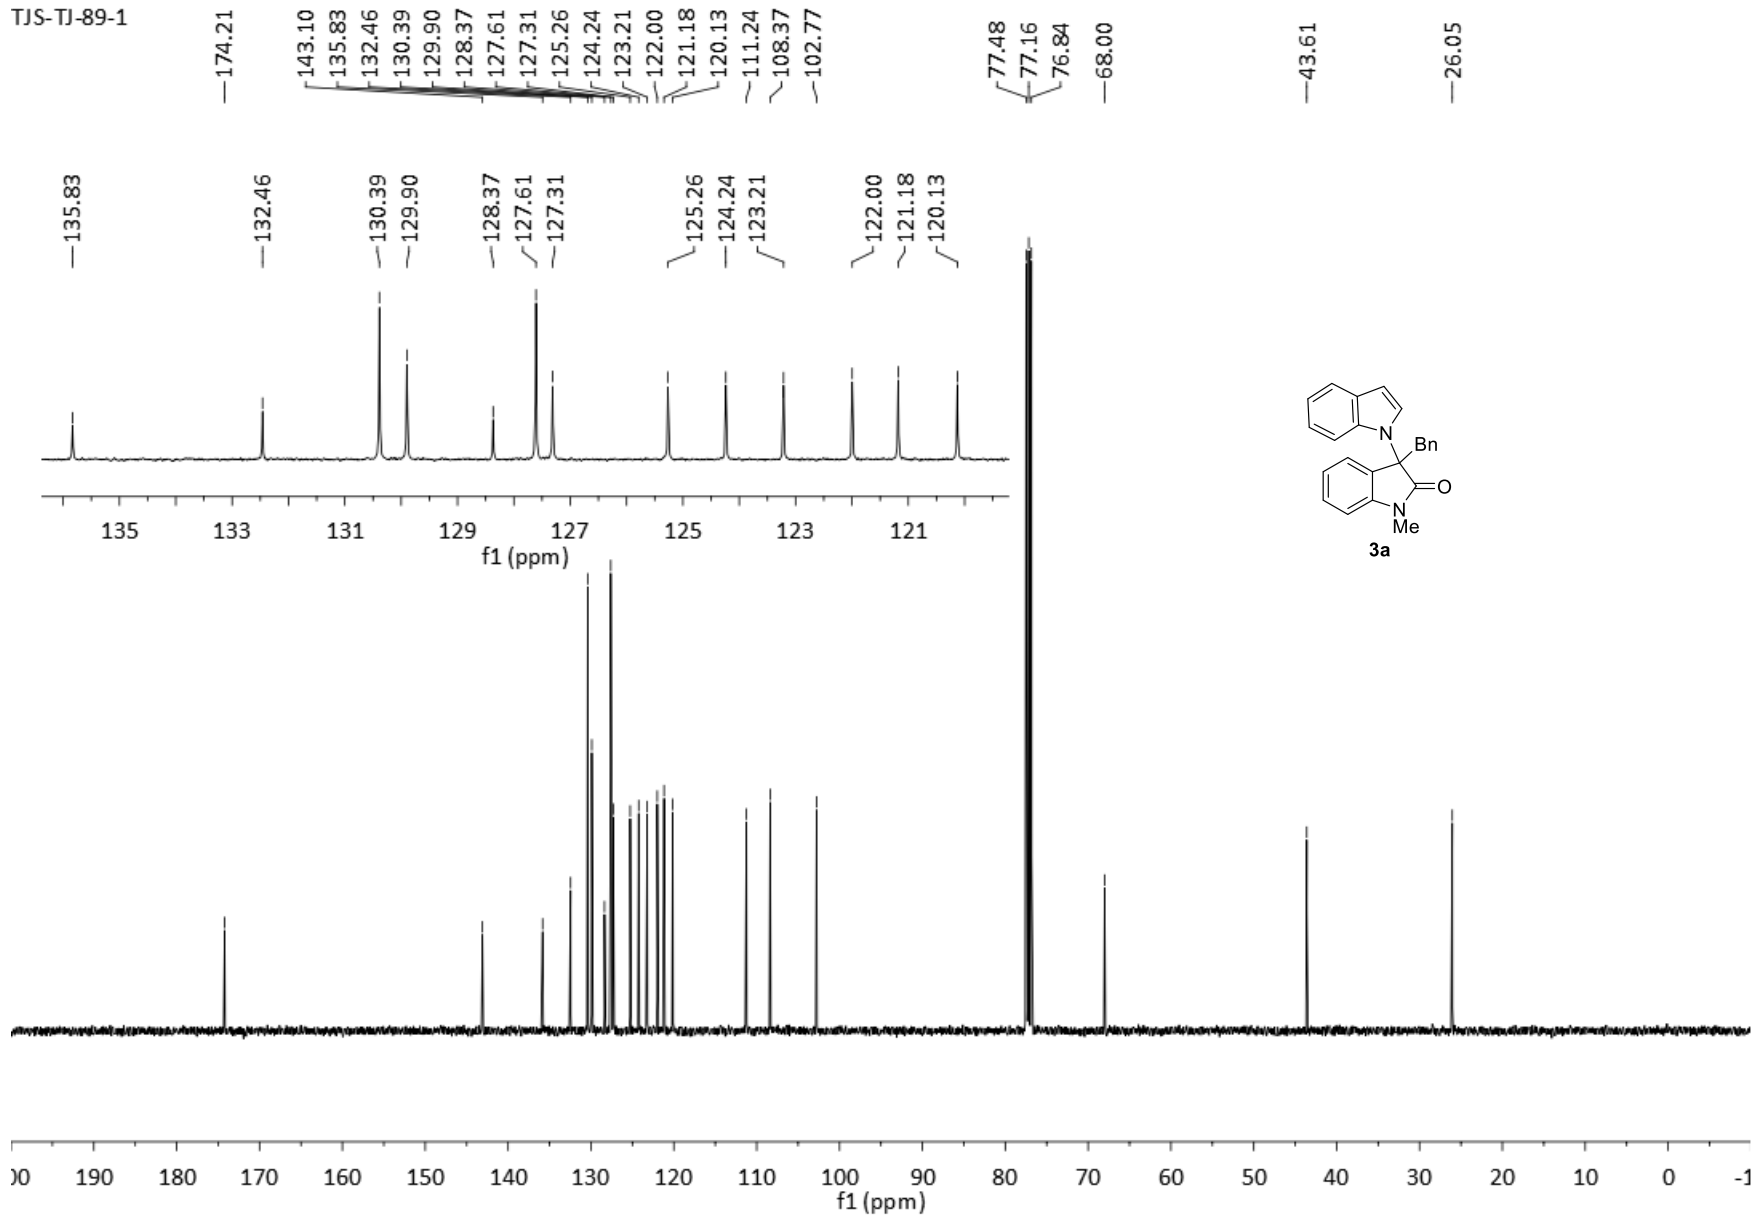

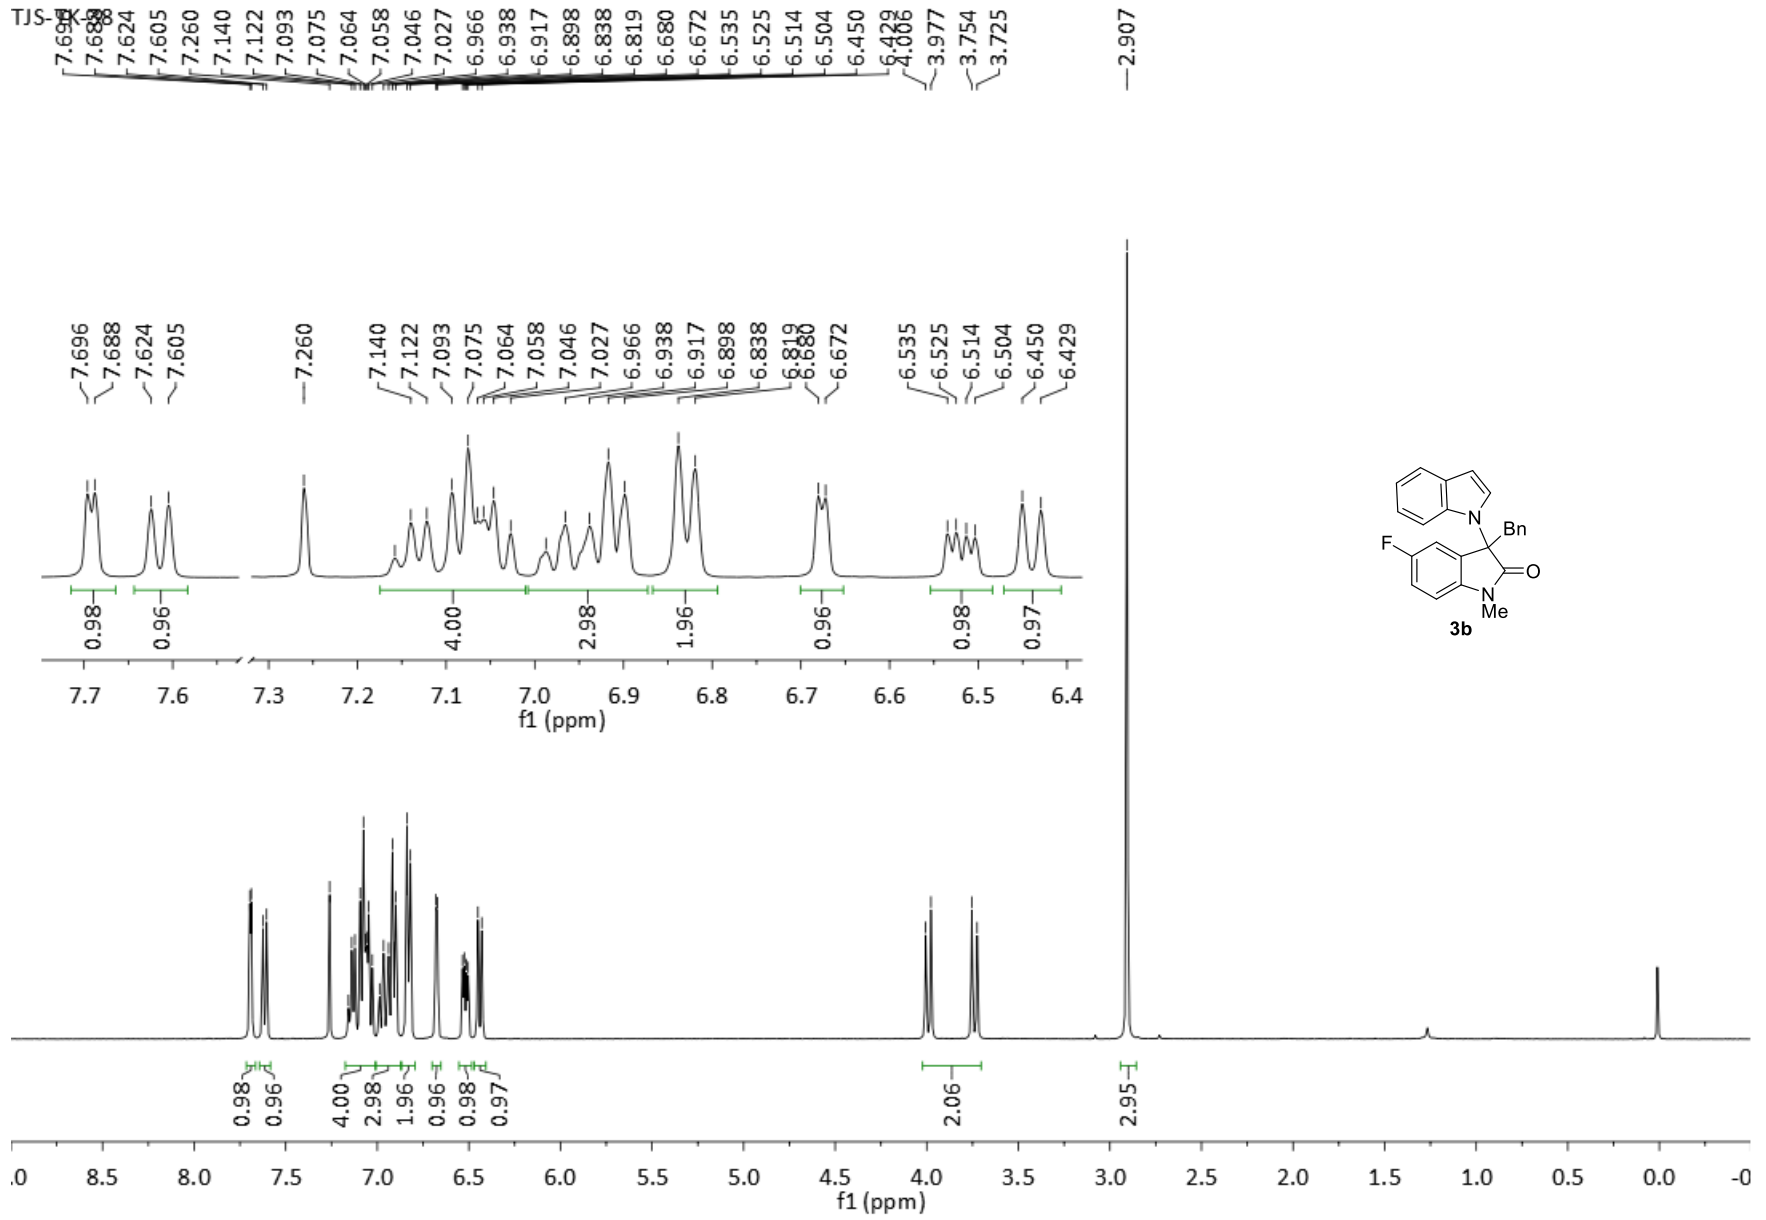

TJS-TK-38

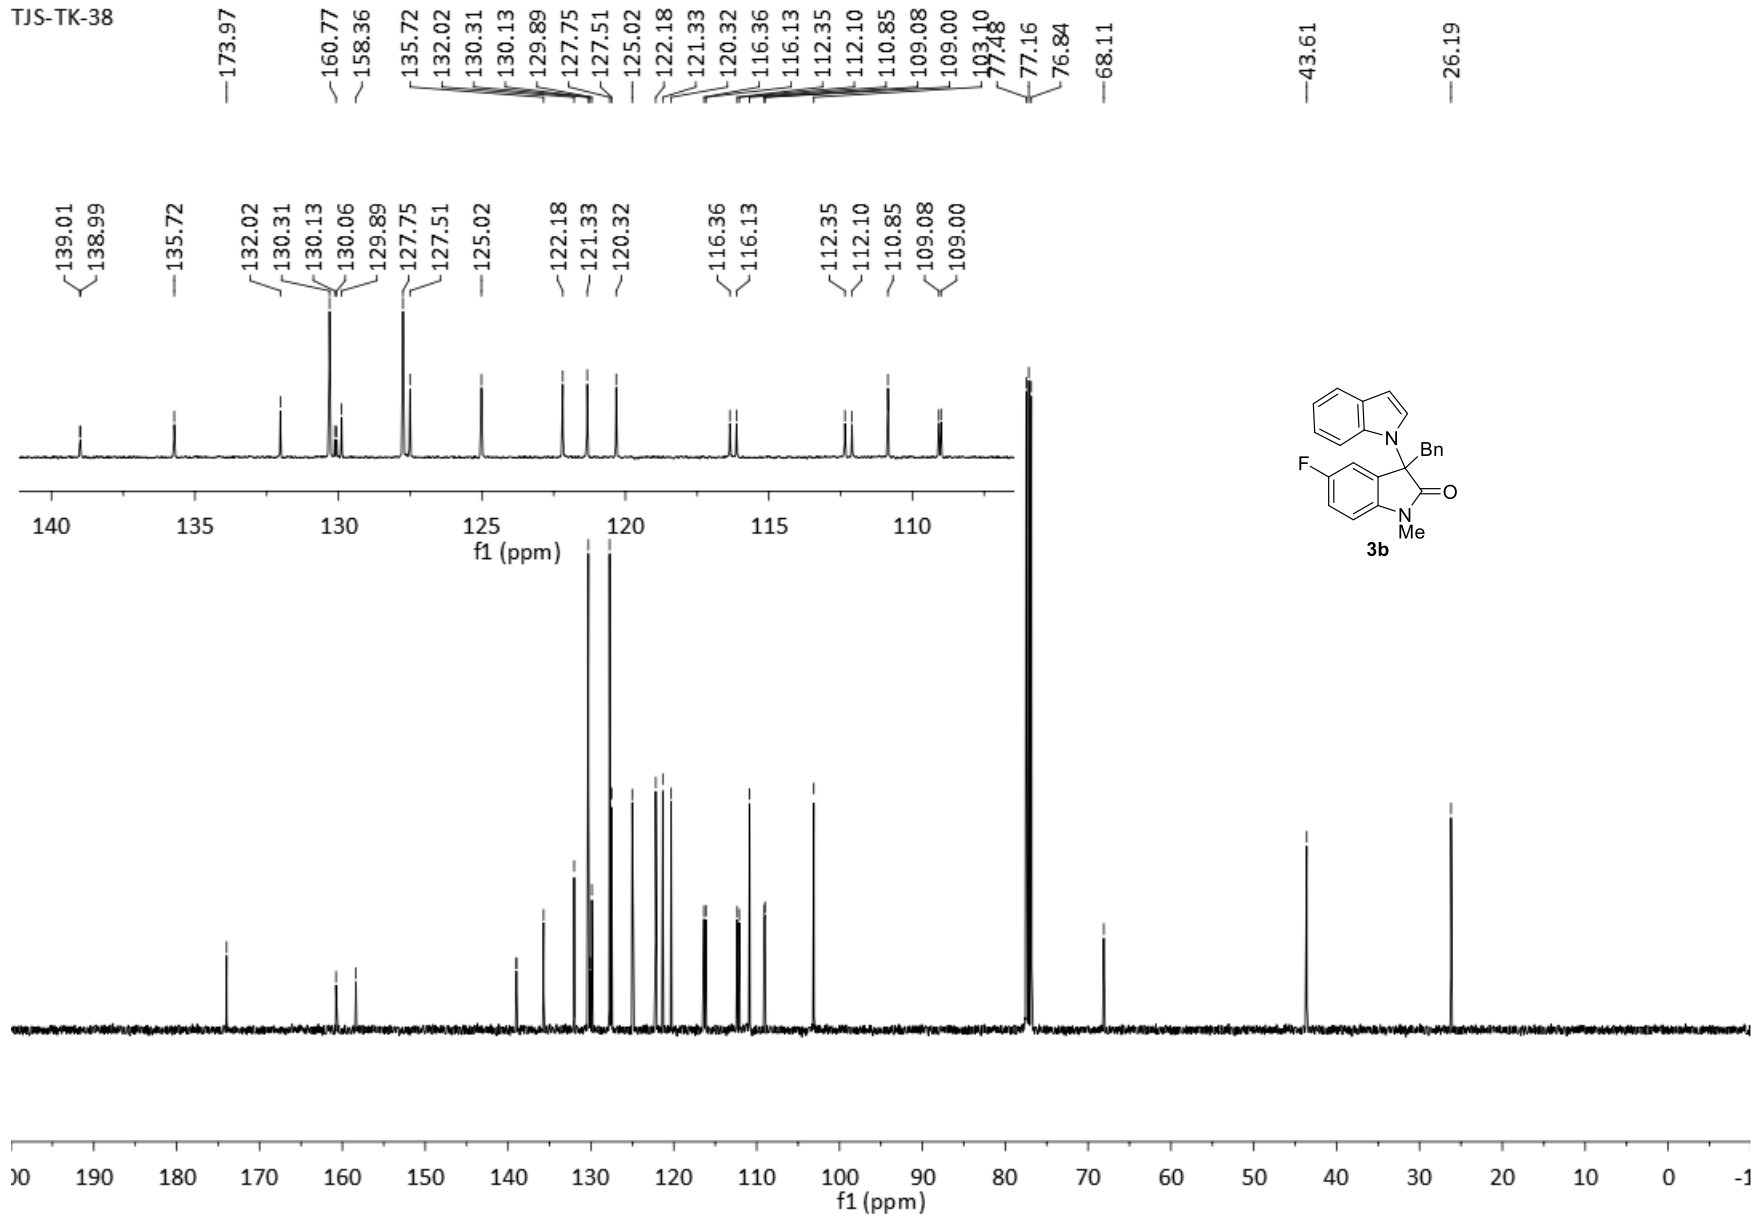

TJS-TK-38

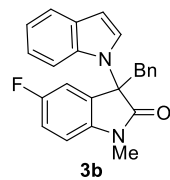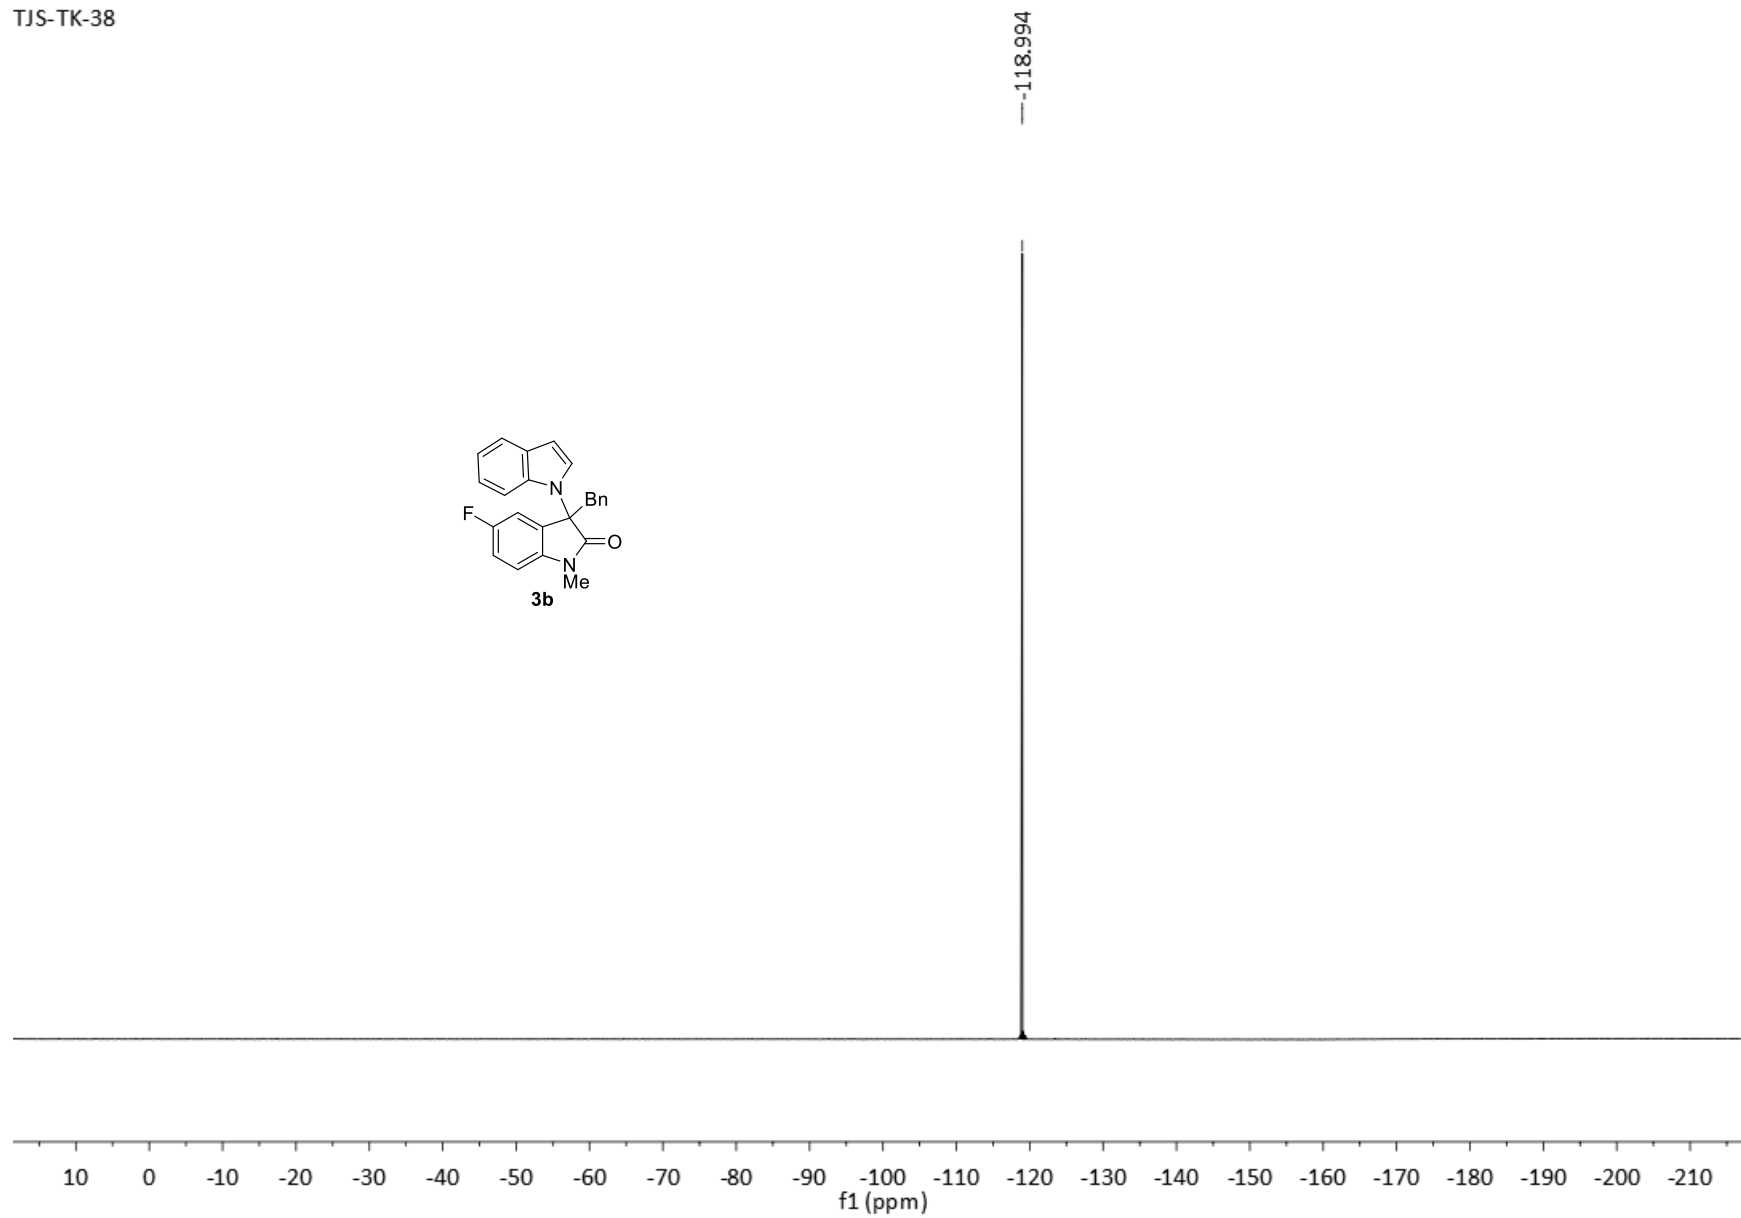

TJS-TK-40

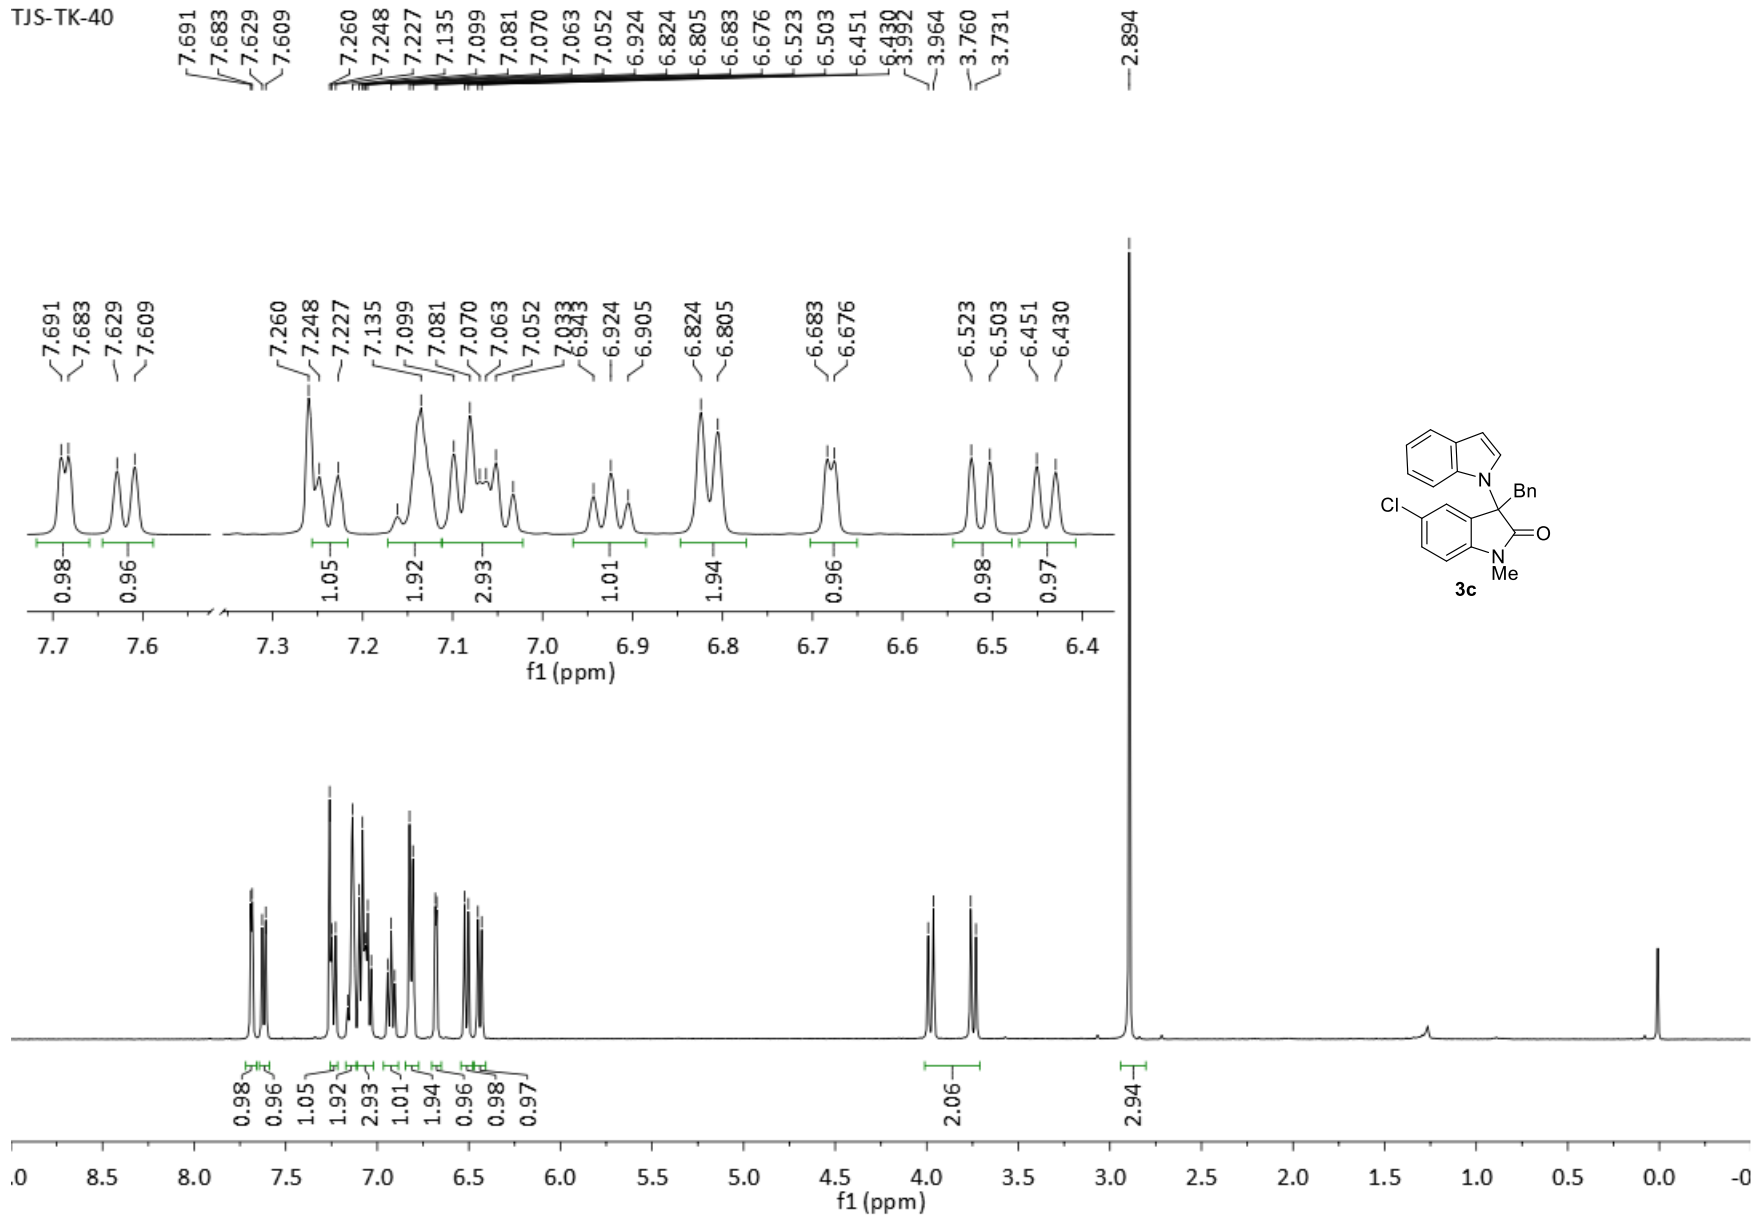

TJS-TK-40

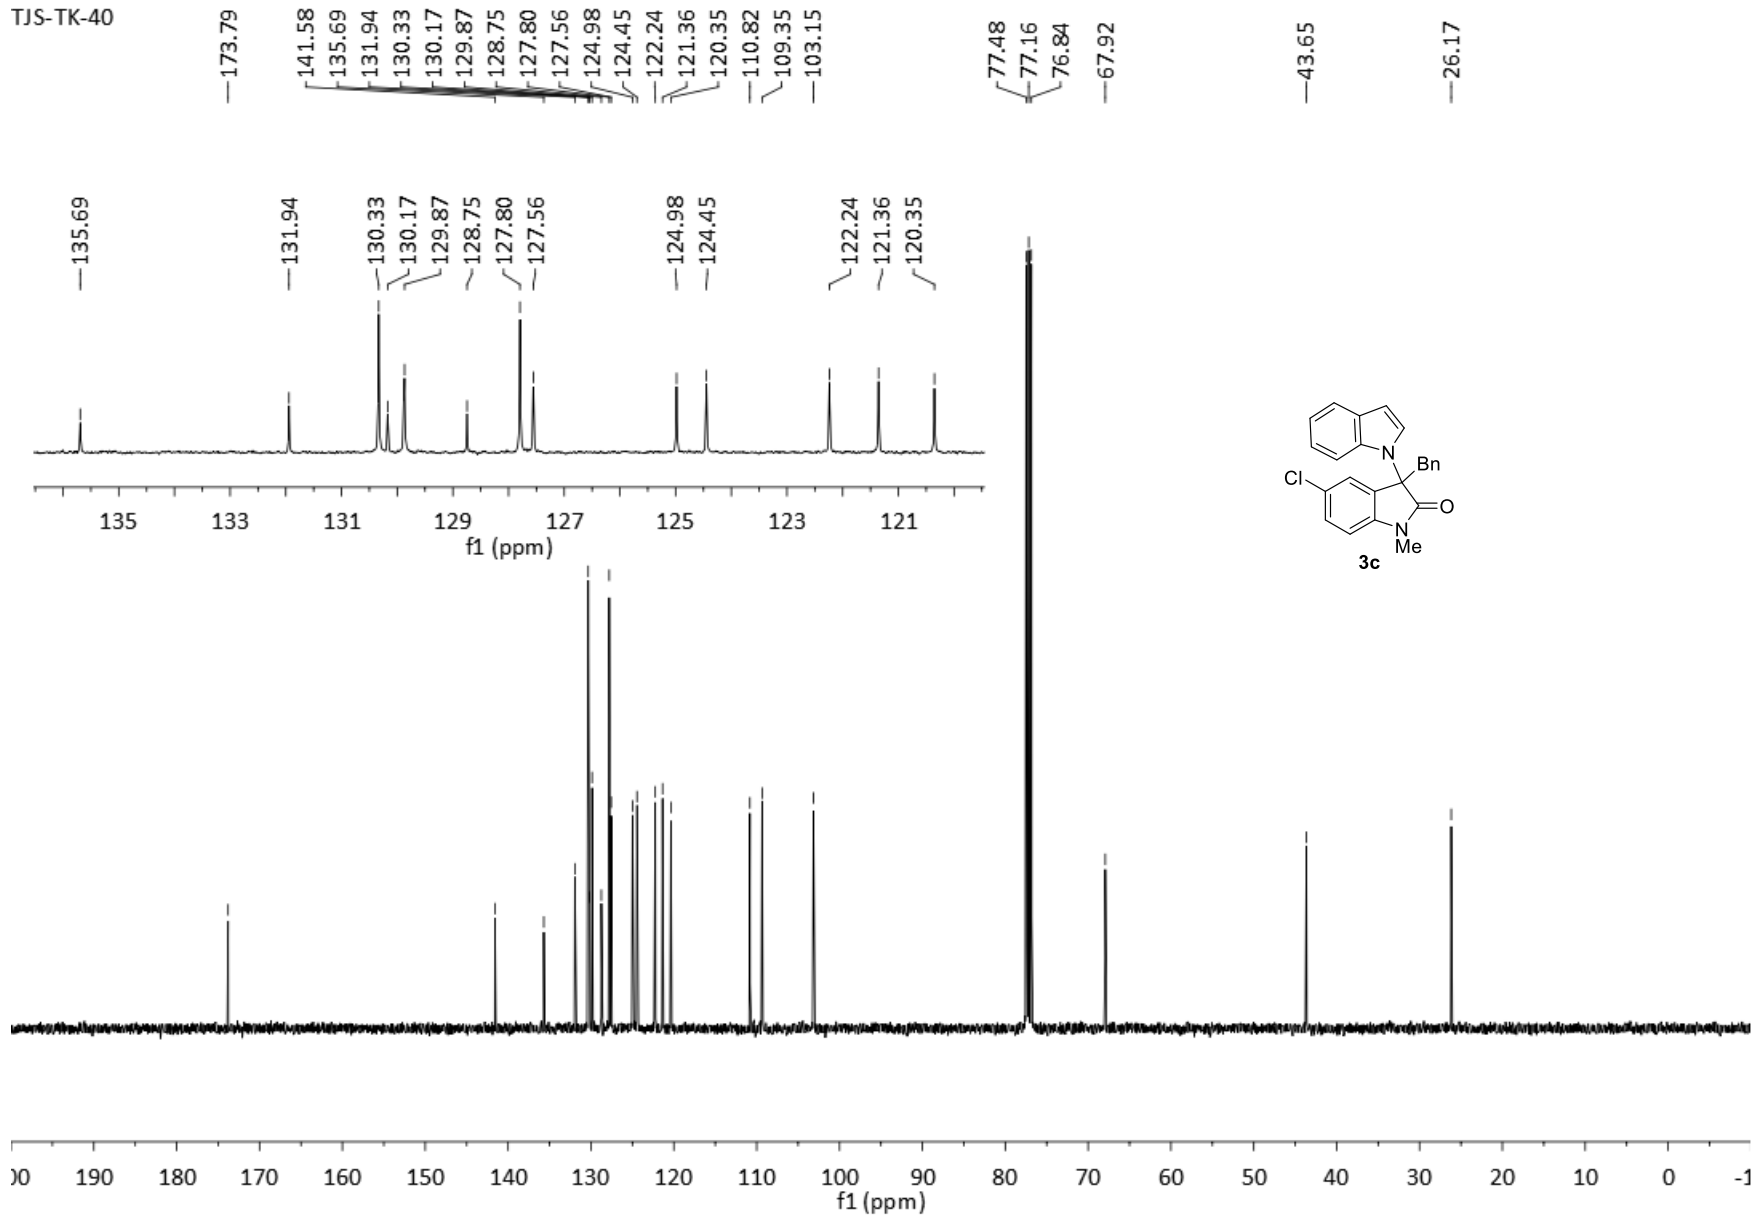

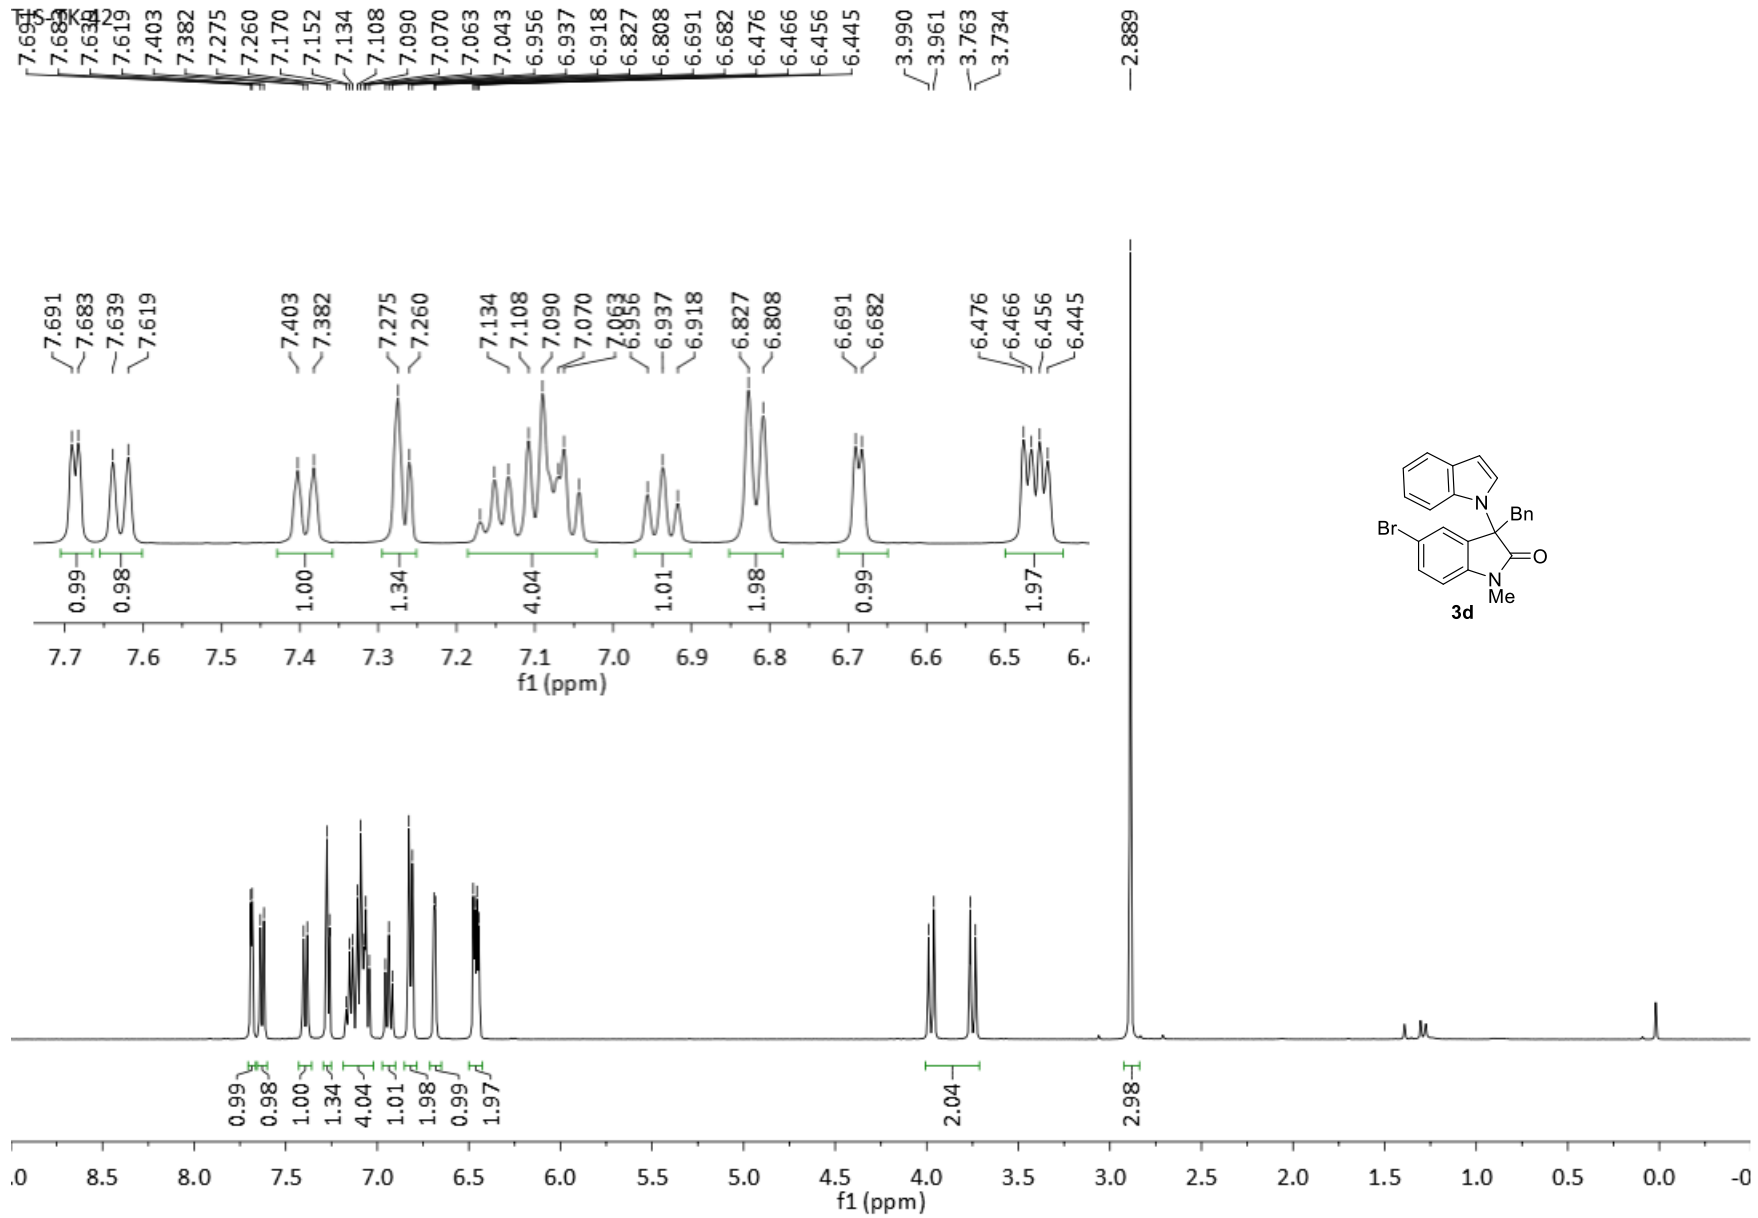



TJS-TK-42

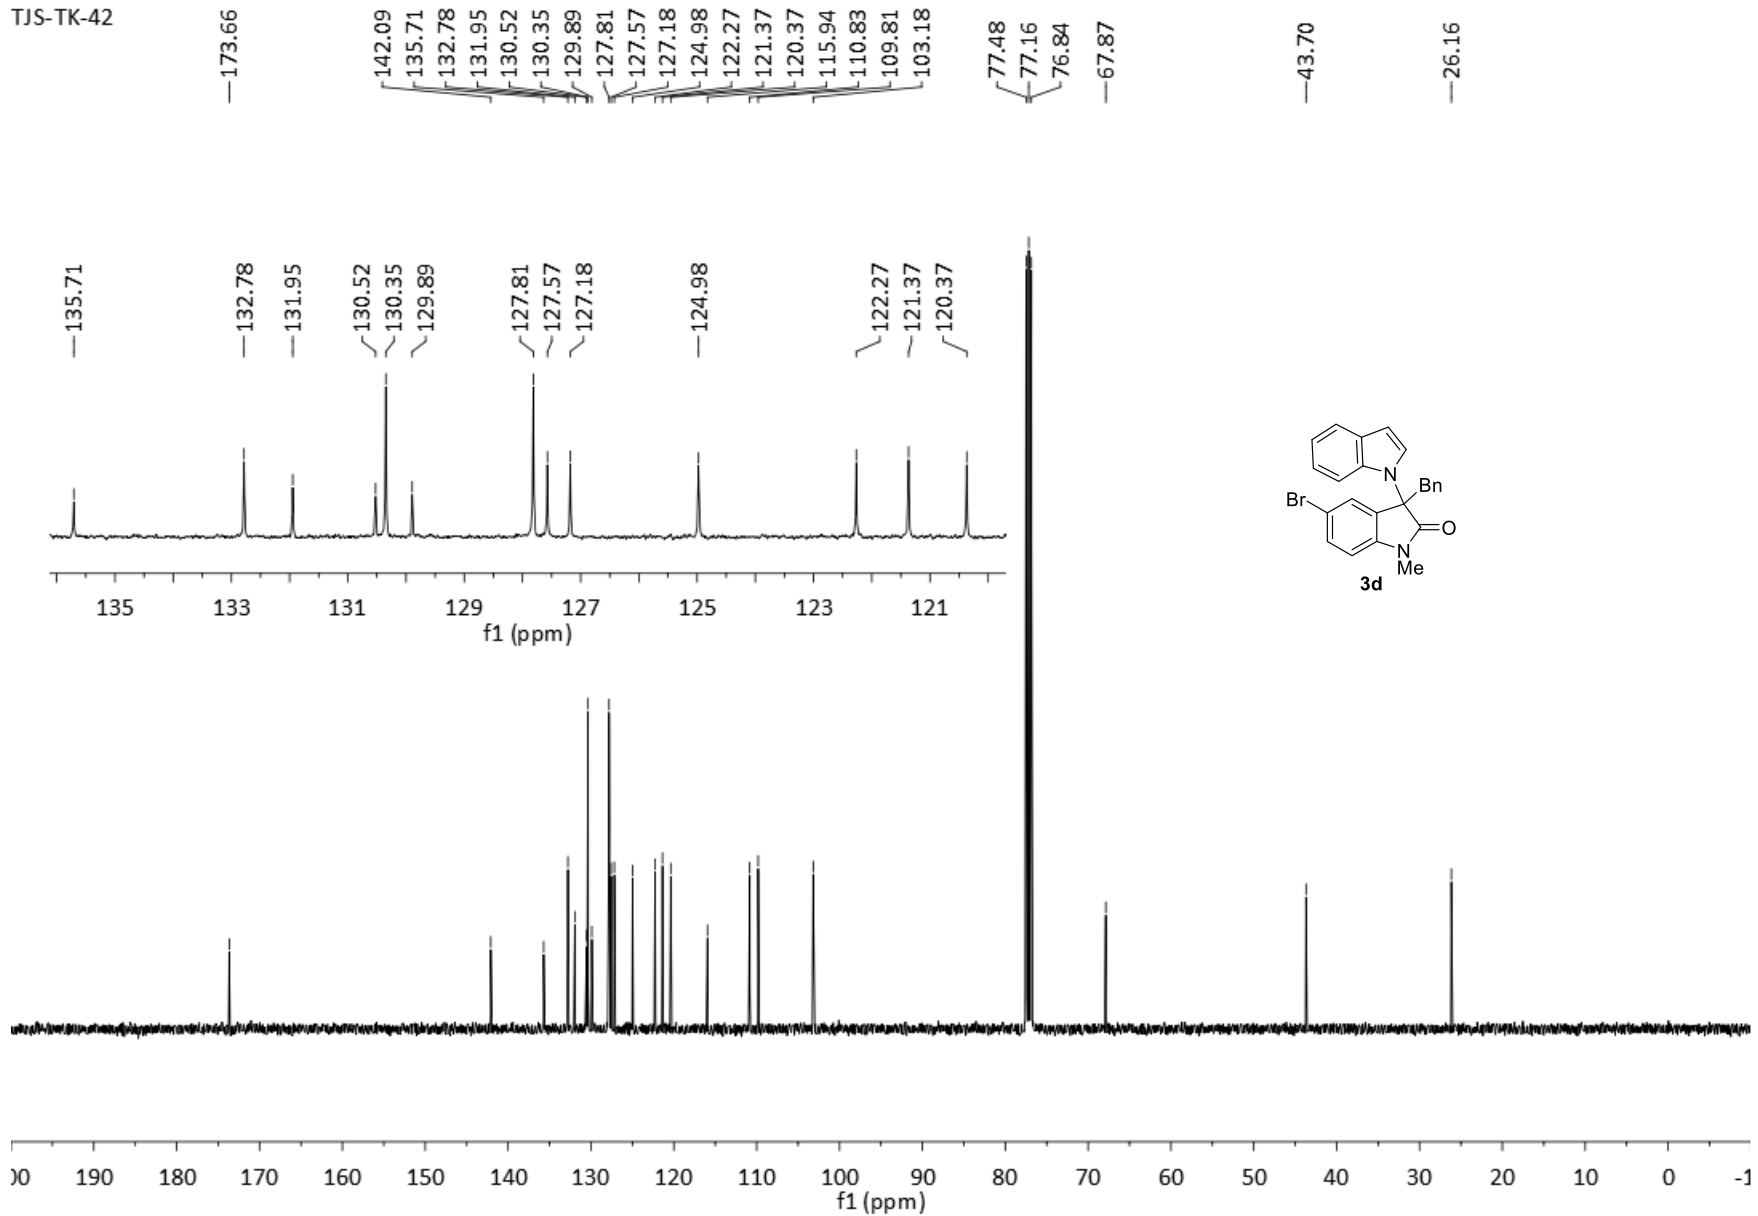

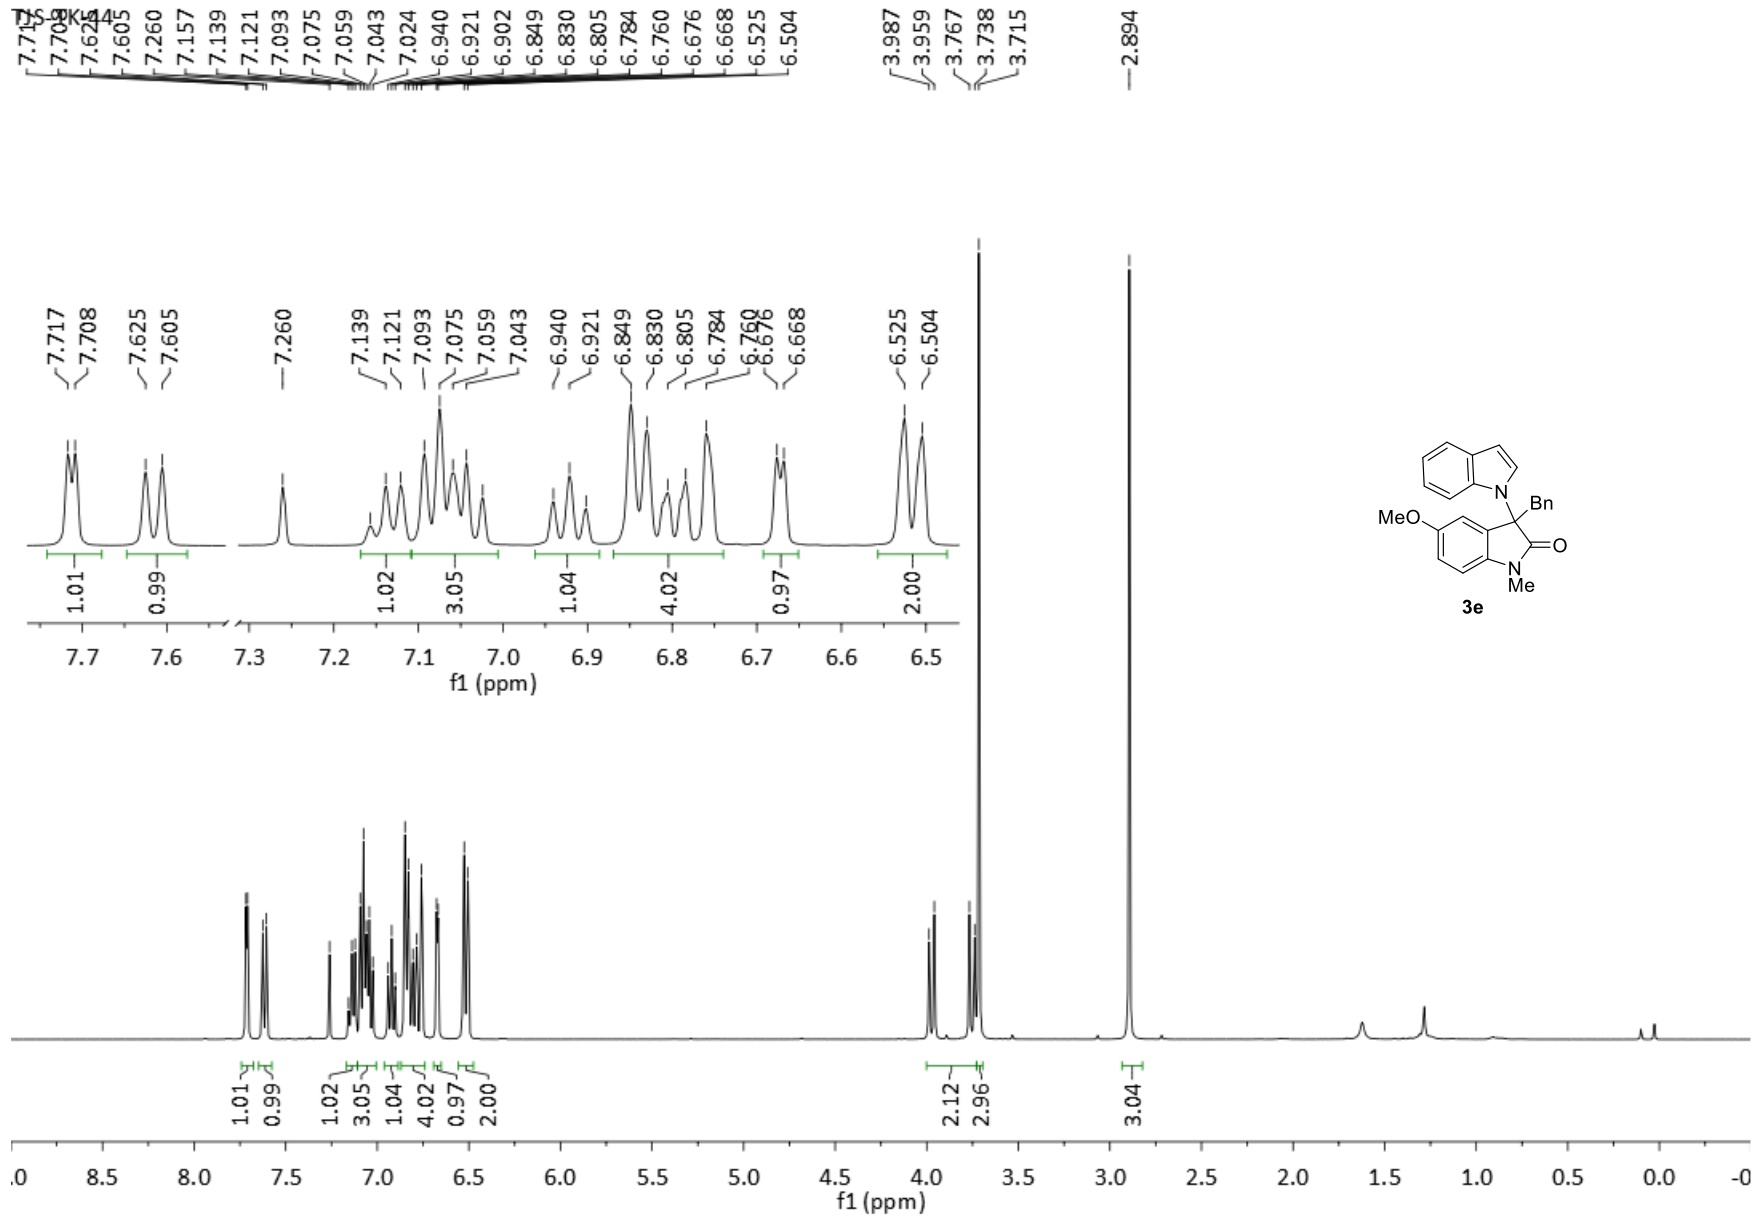

TJS-TK-44

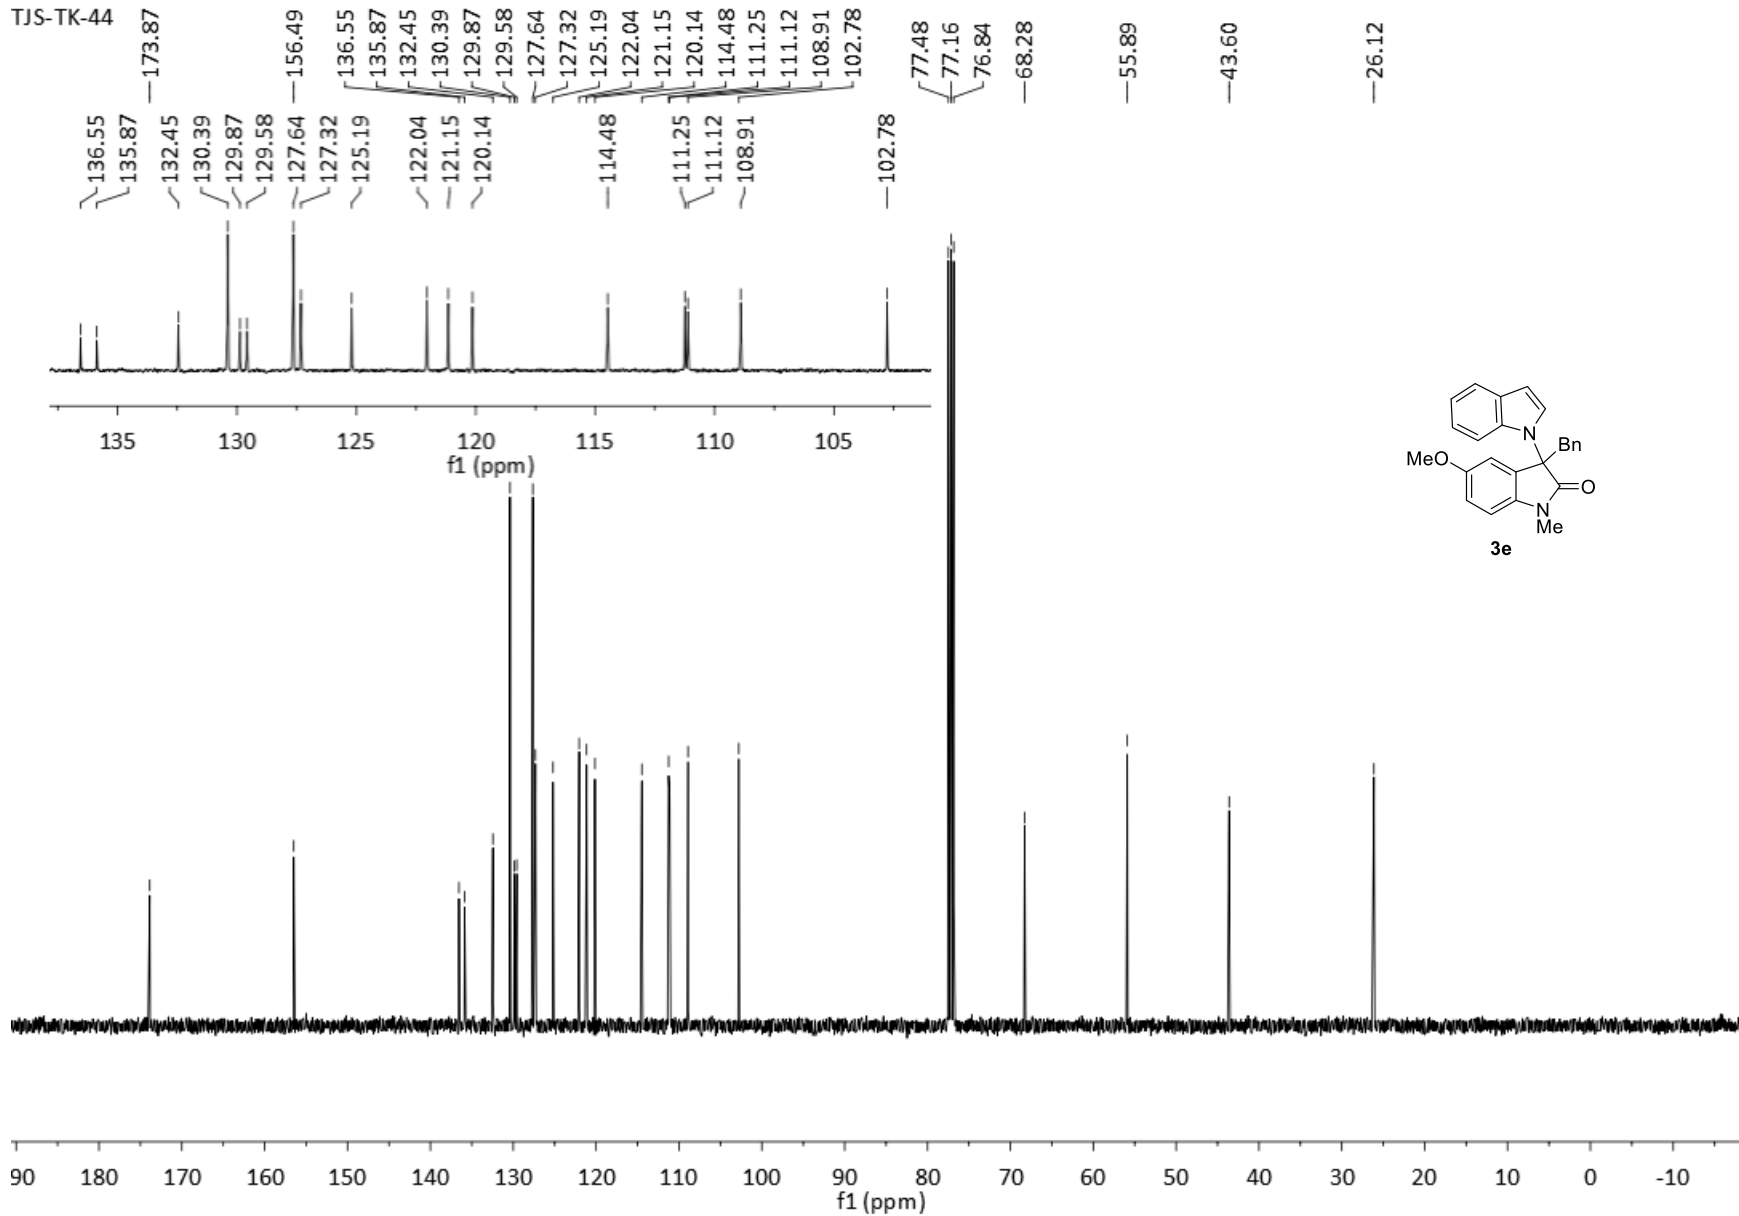

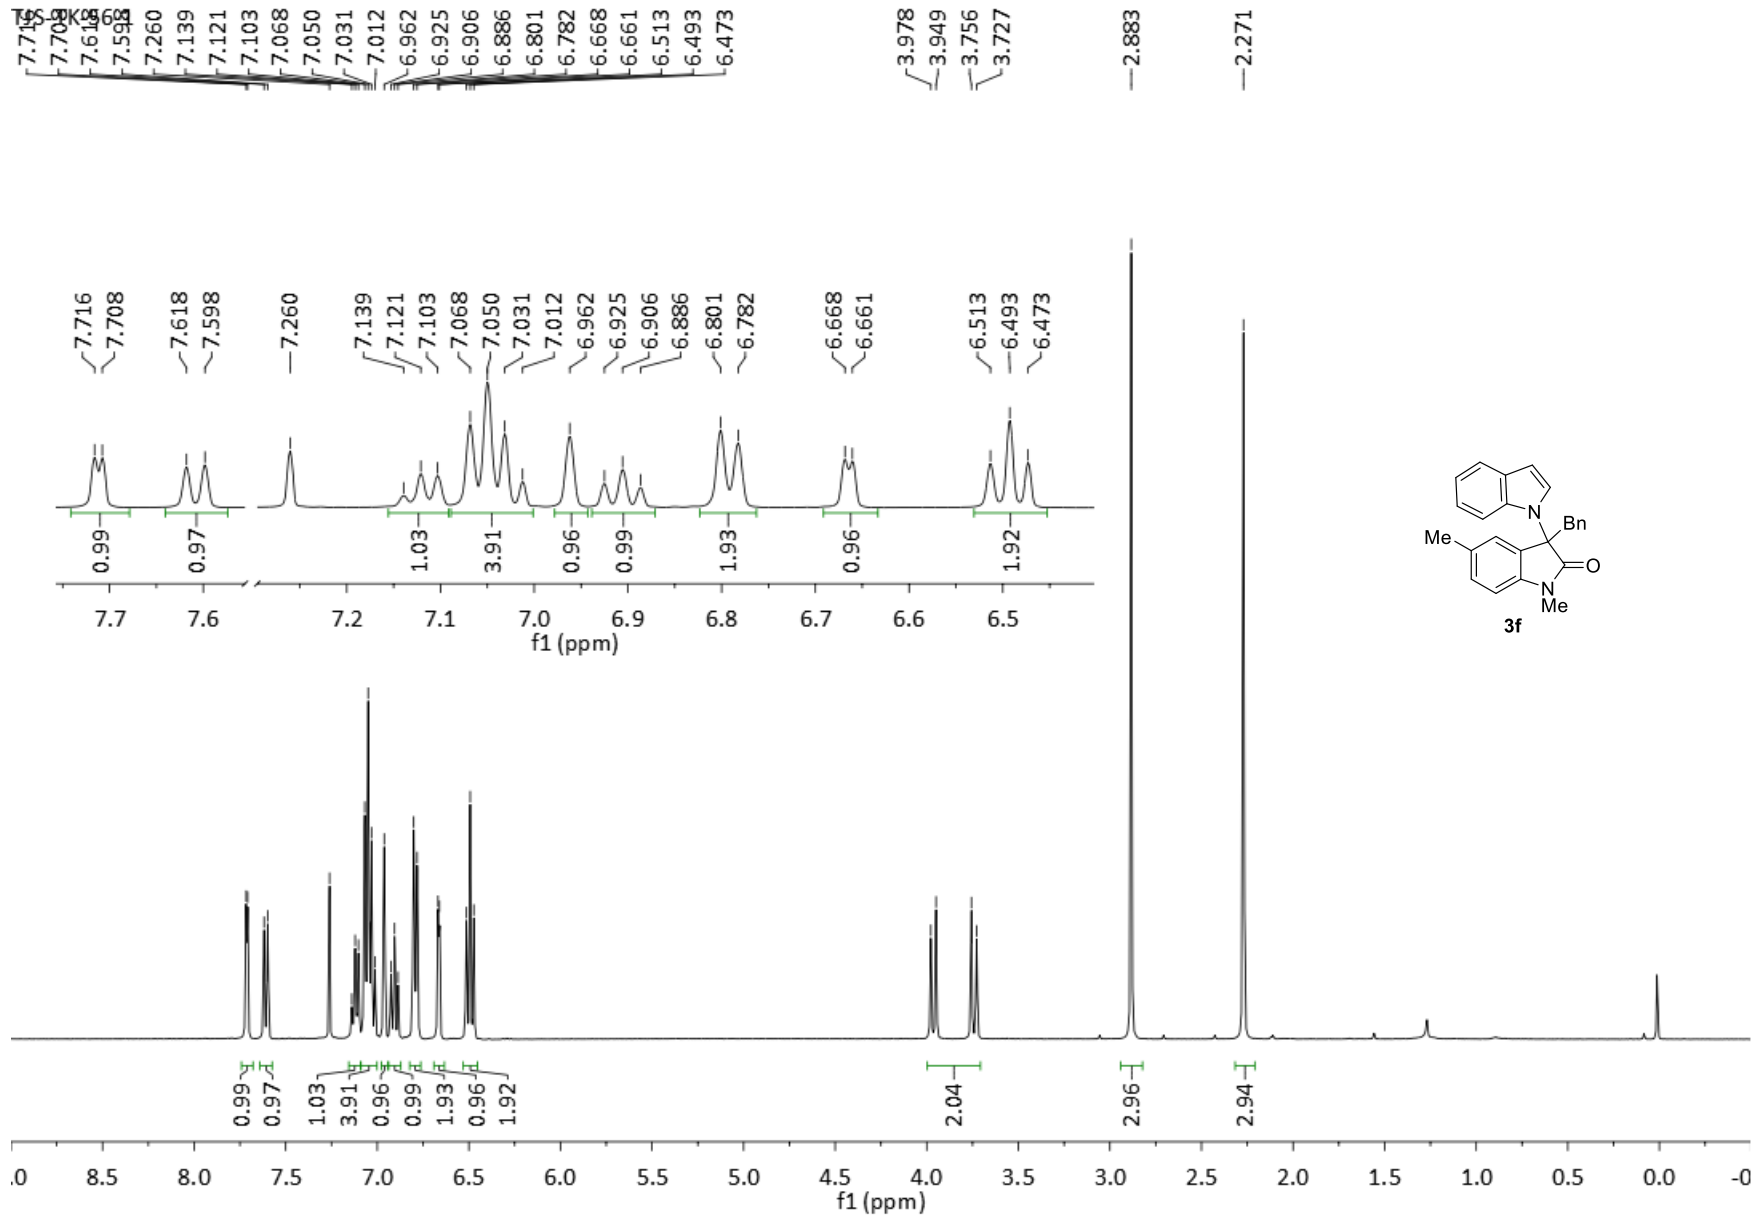

TJS-TK-56-1

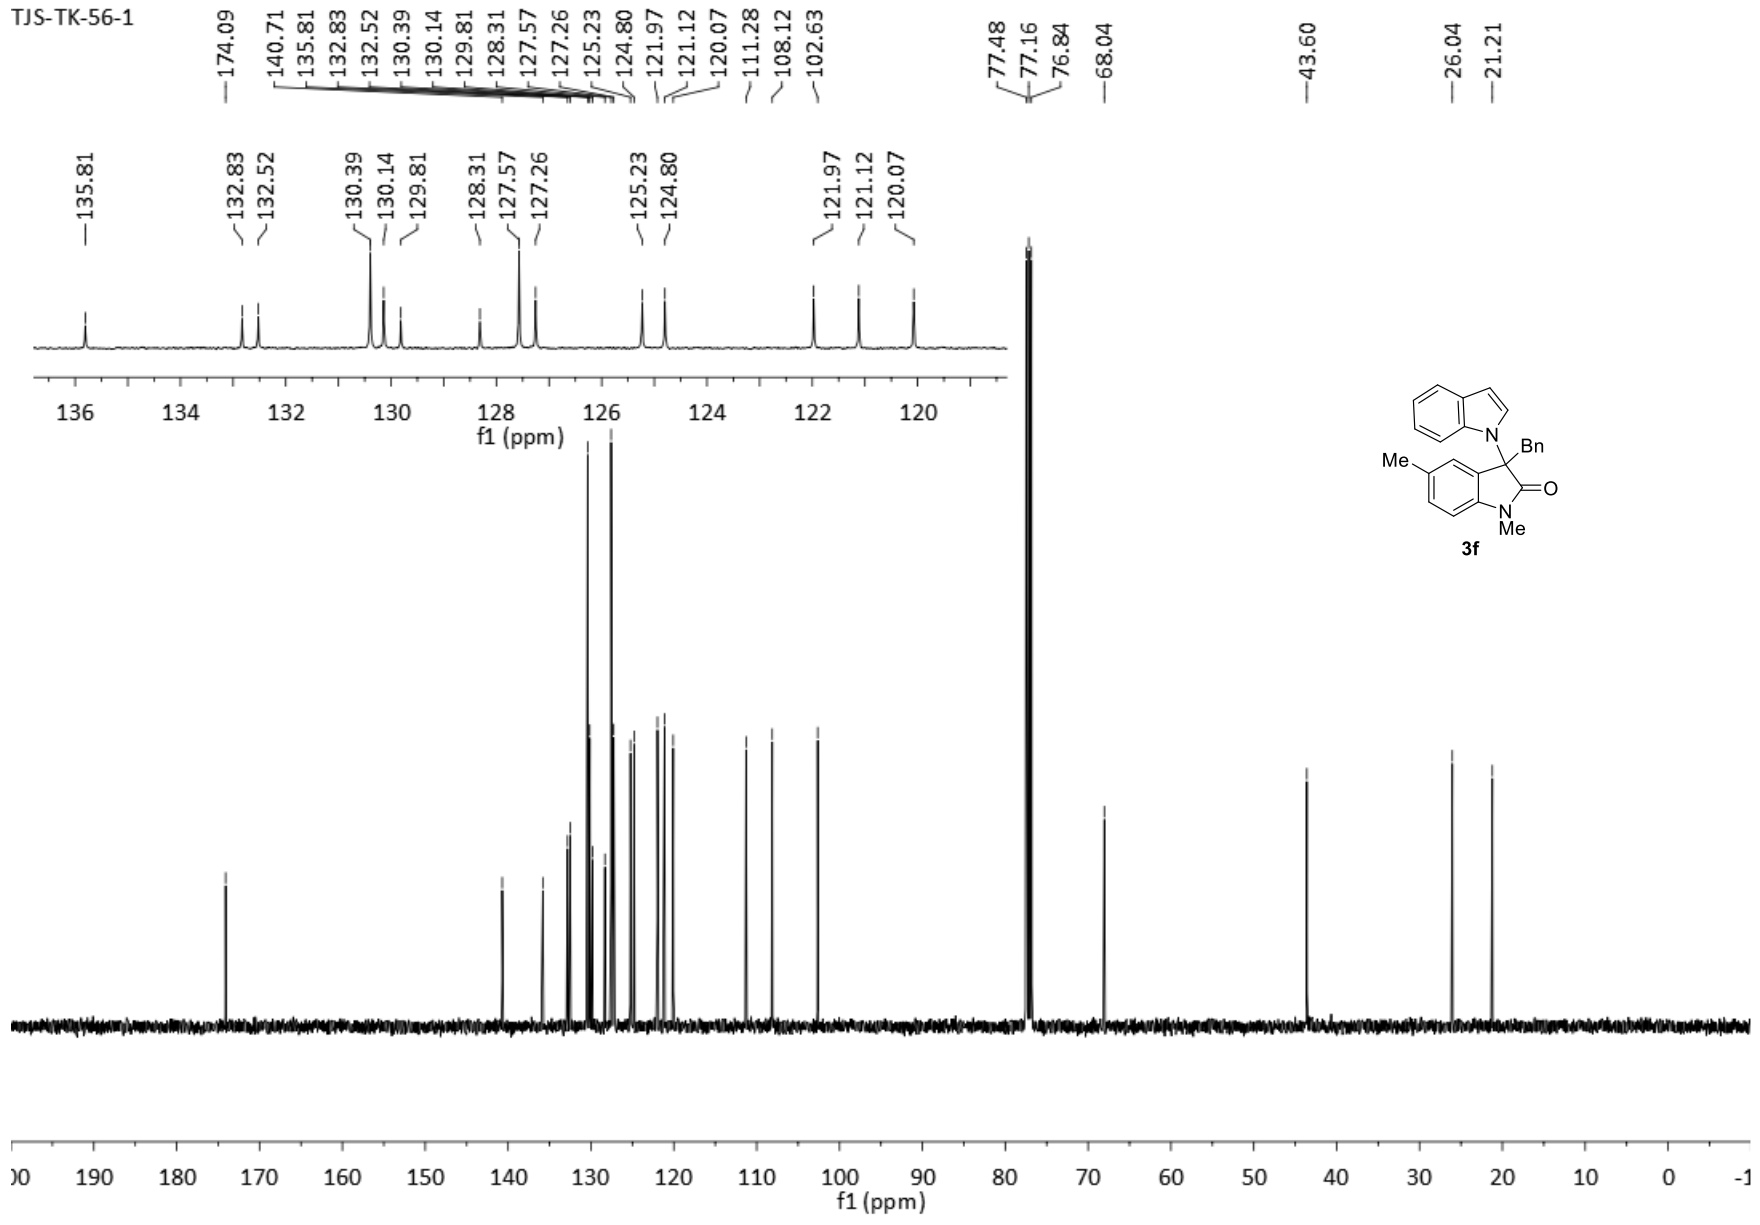



TJS-TK-74

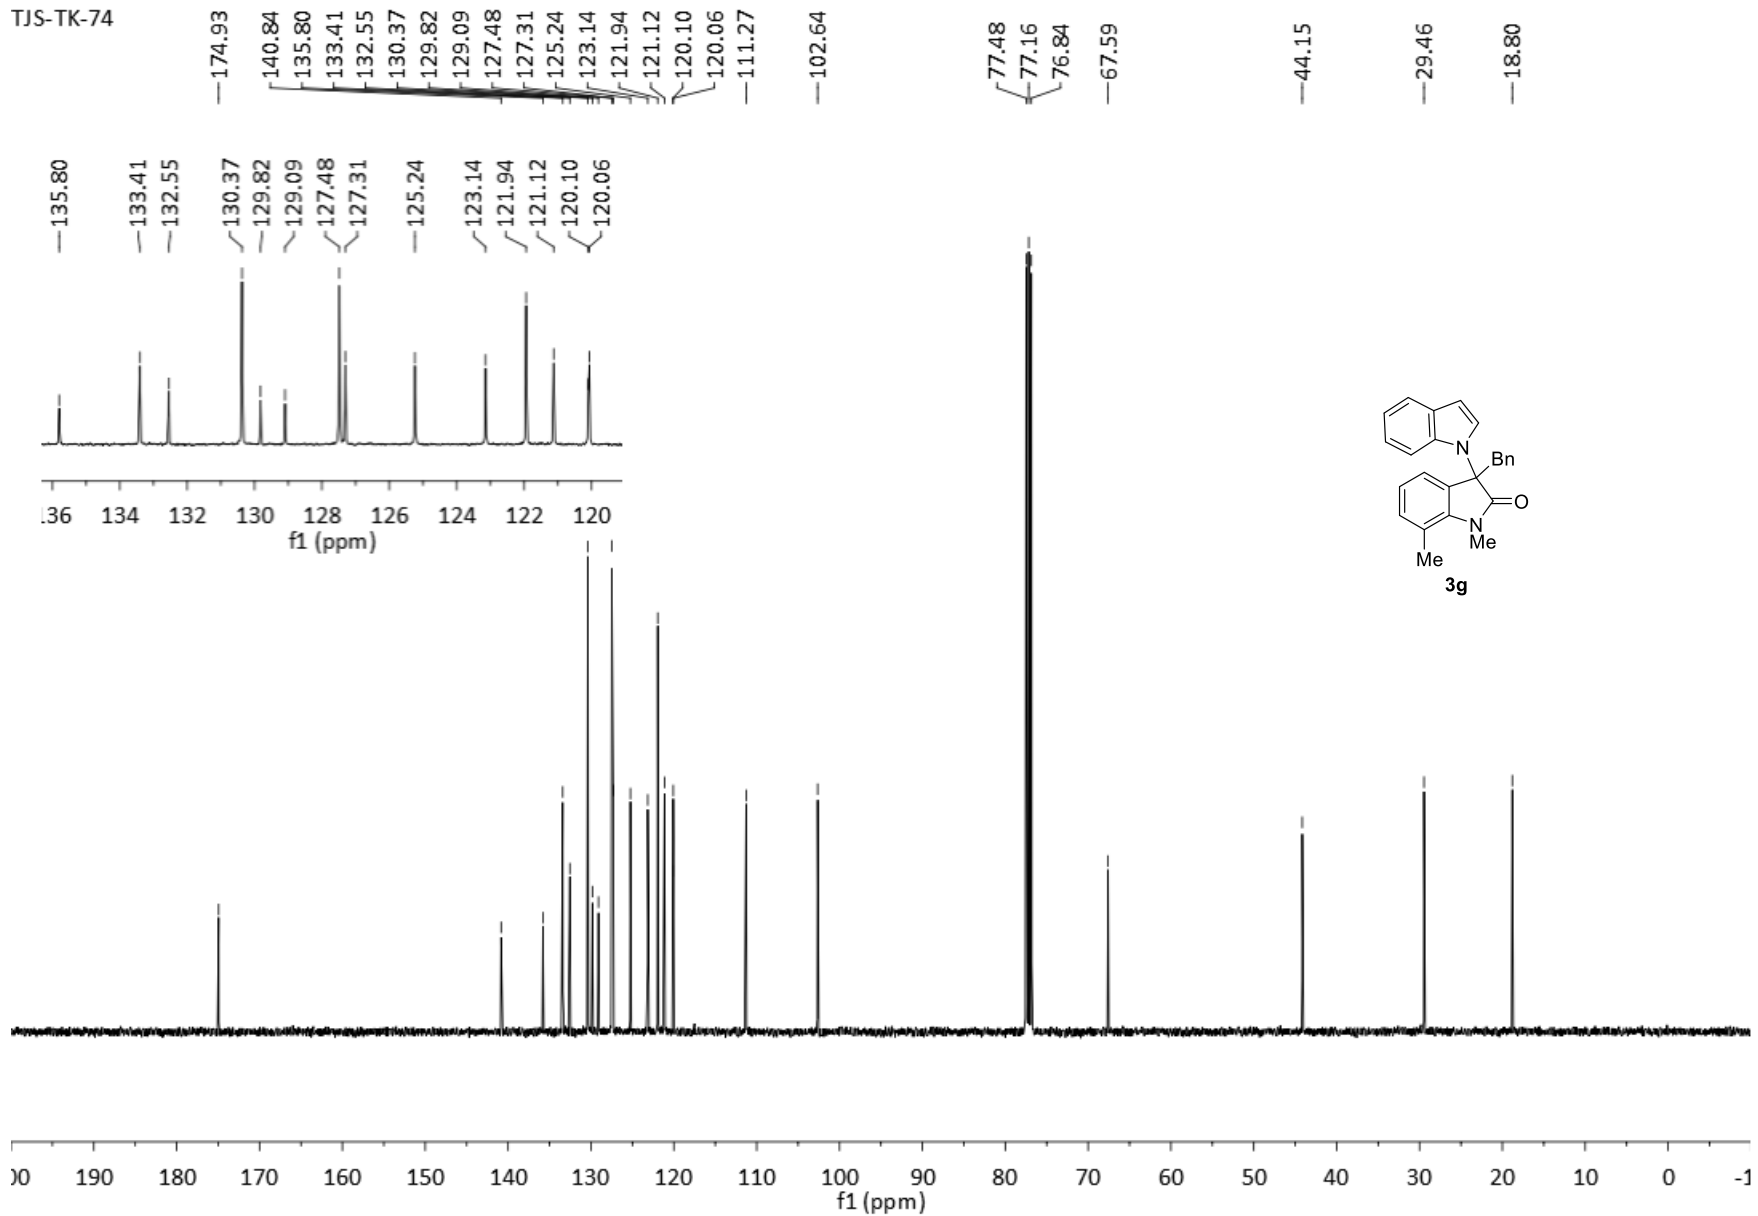

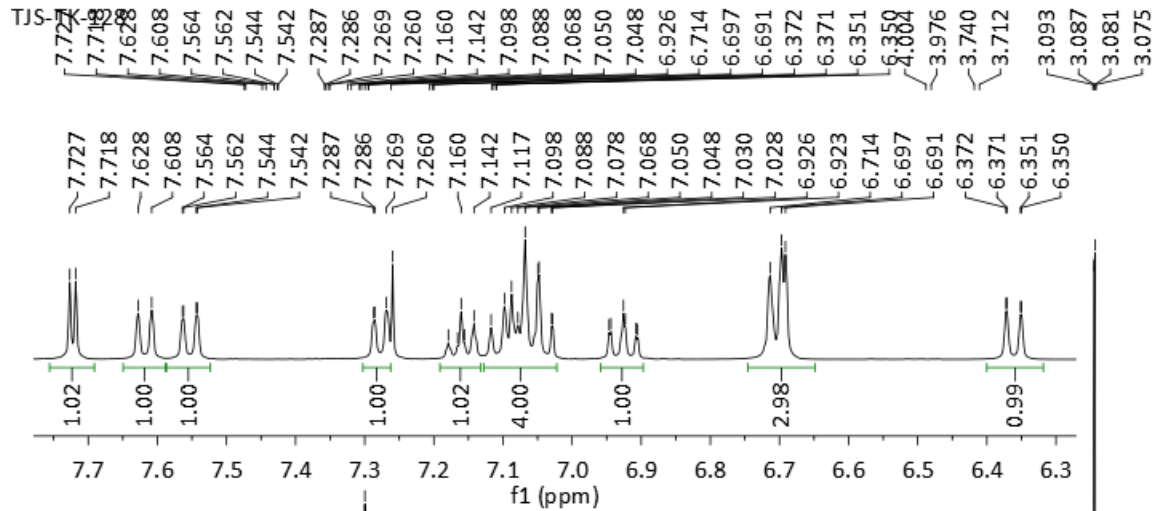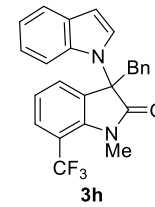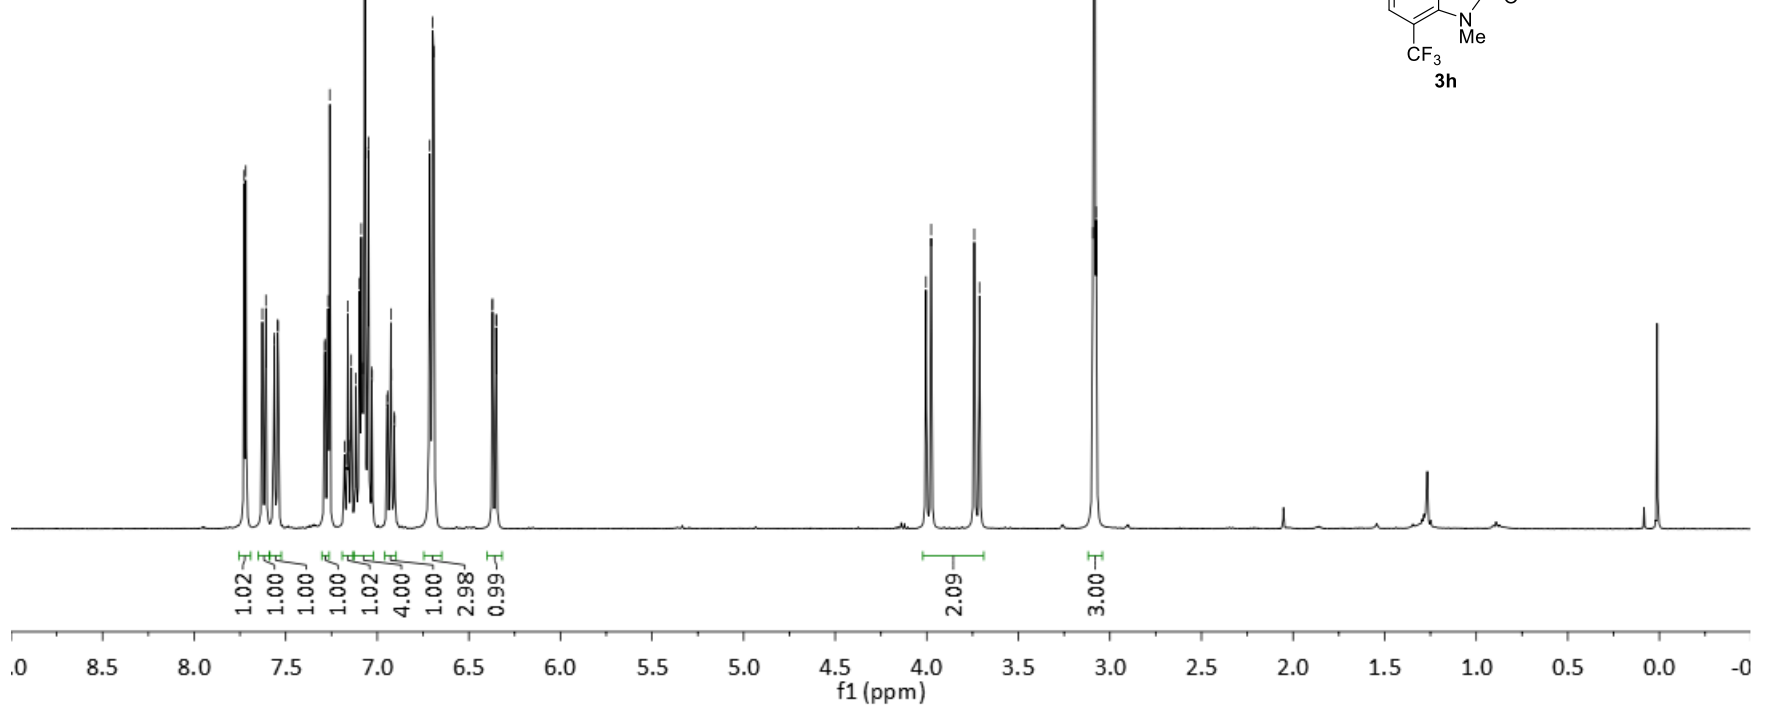



TJS-TK-128

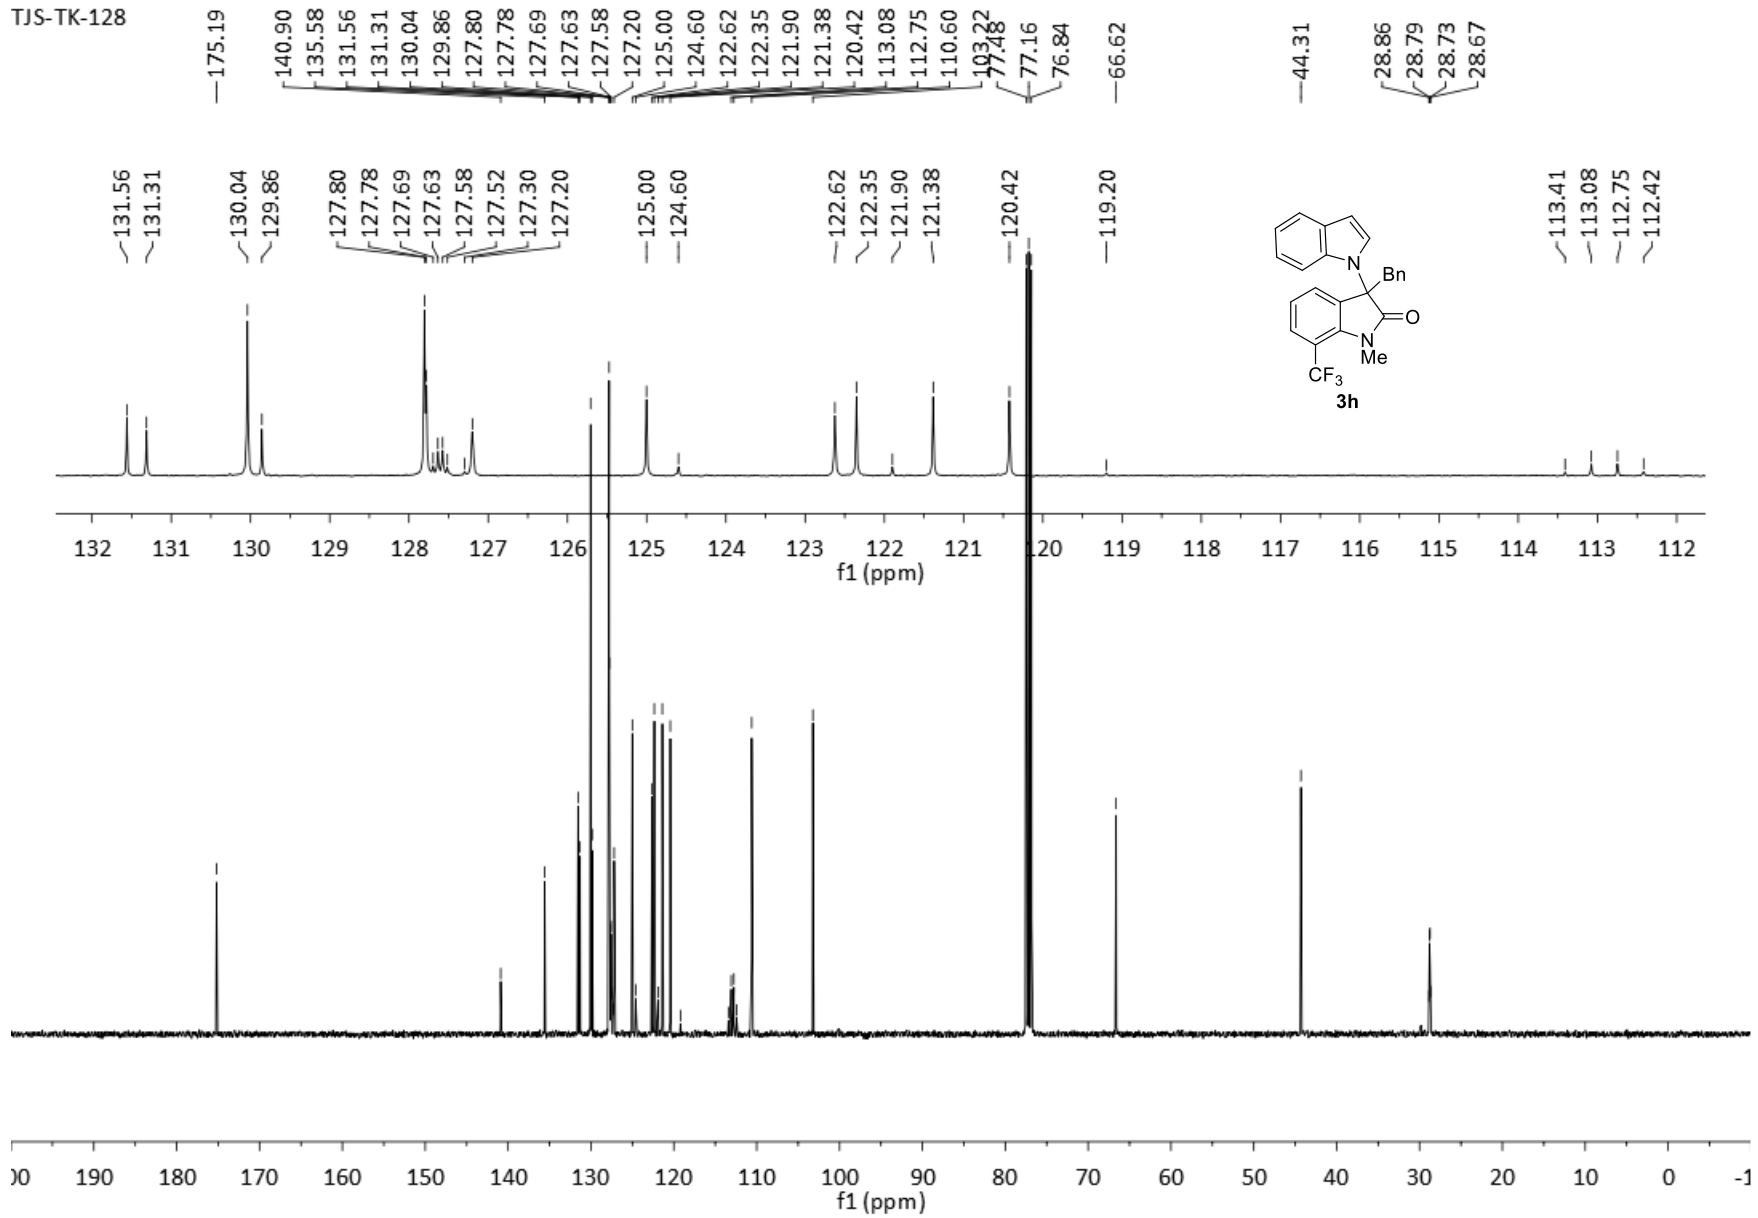



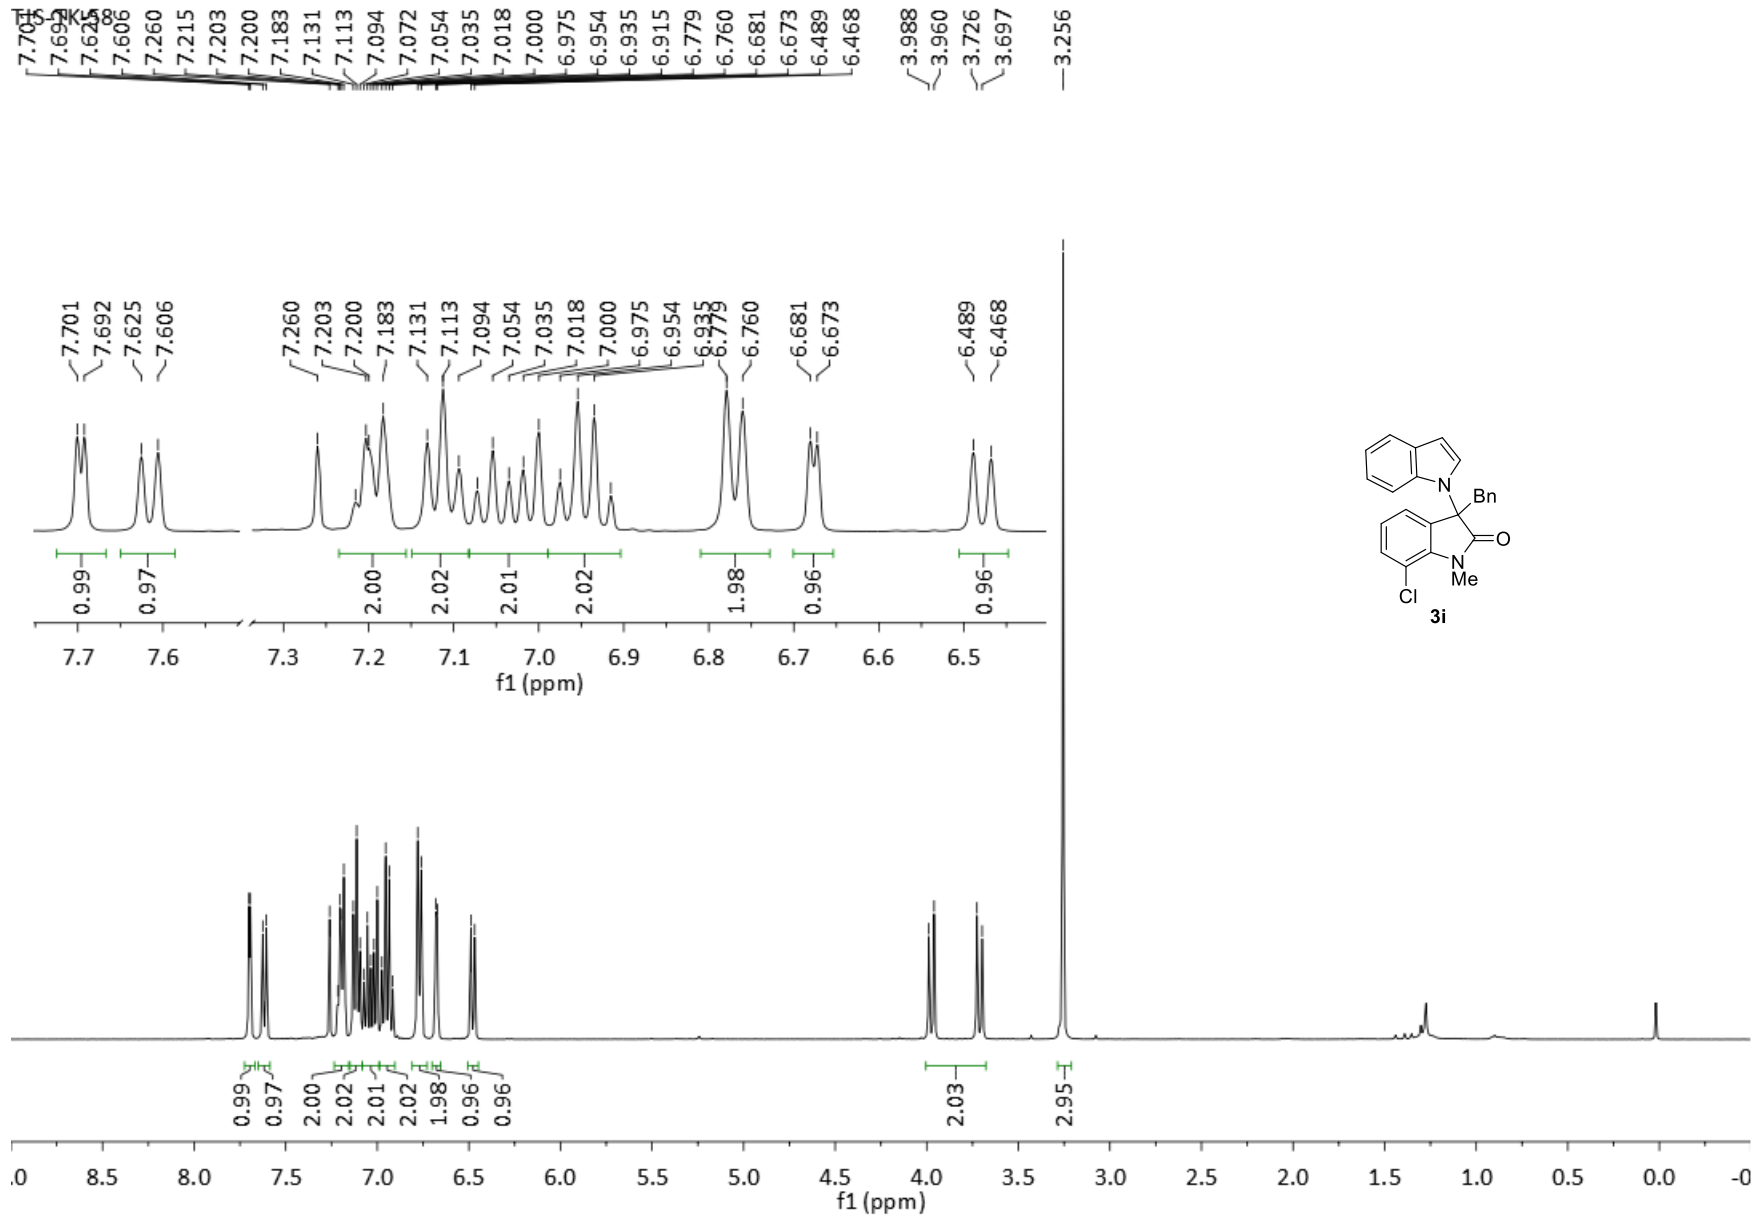

TJS-TK-58-1

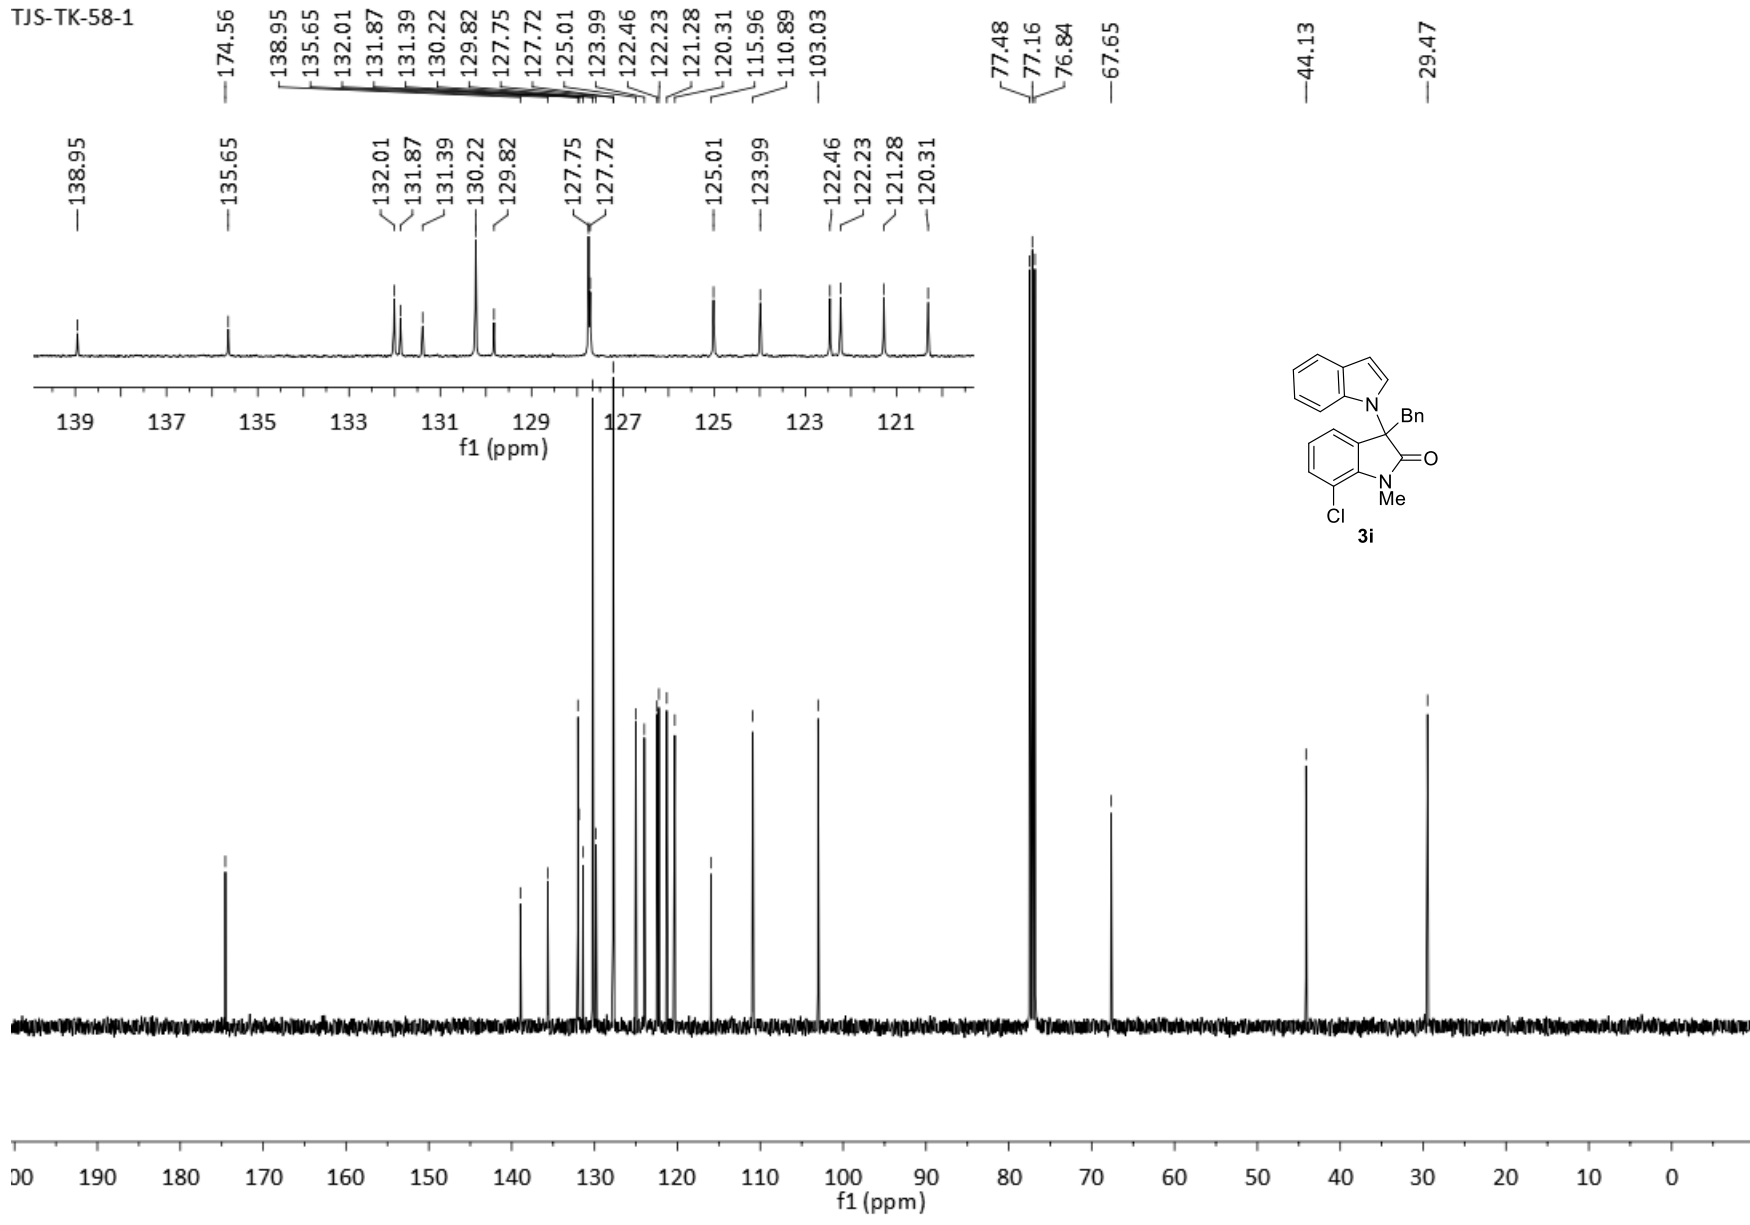

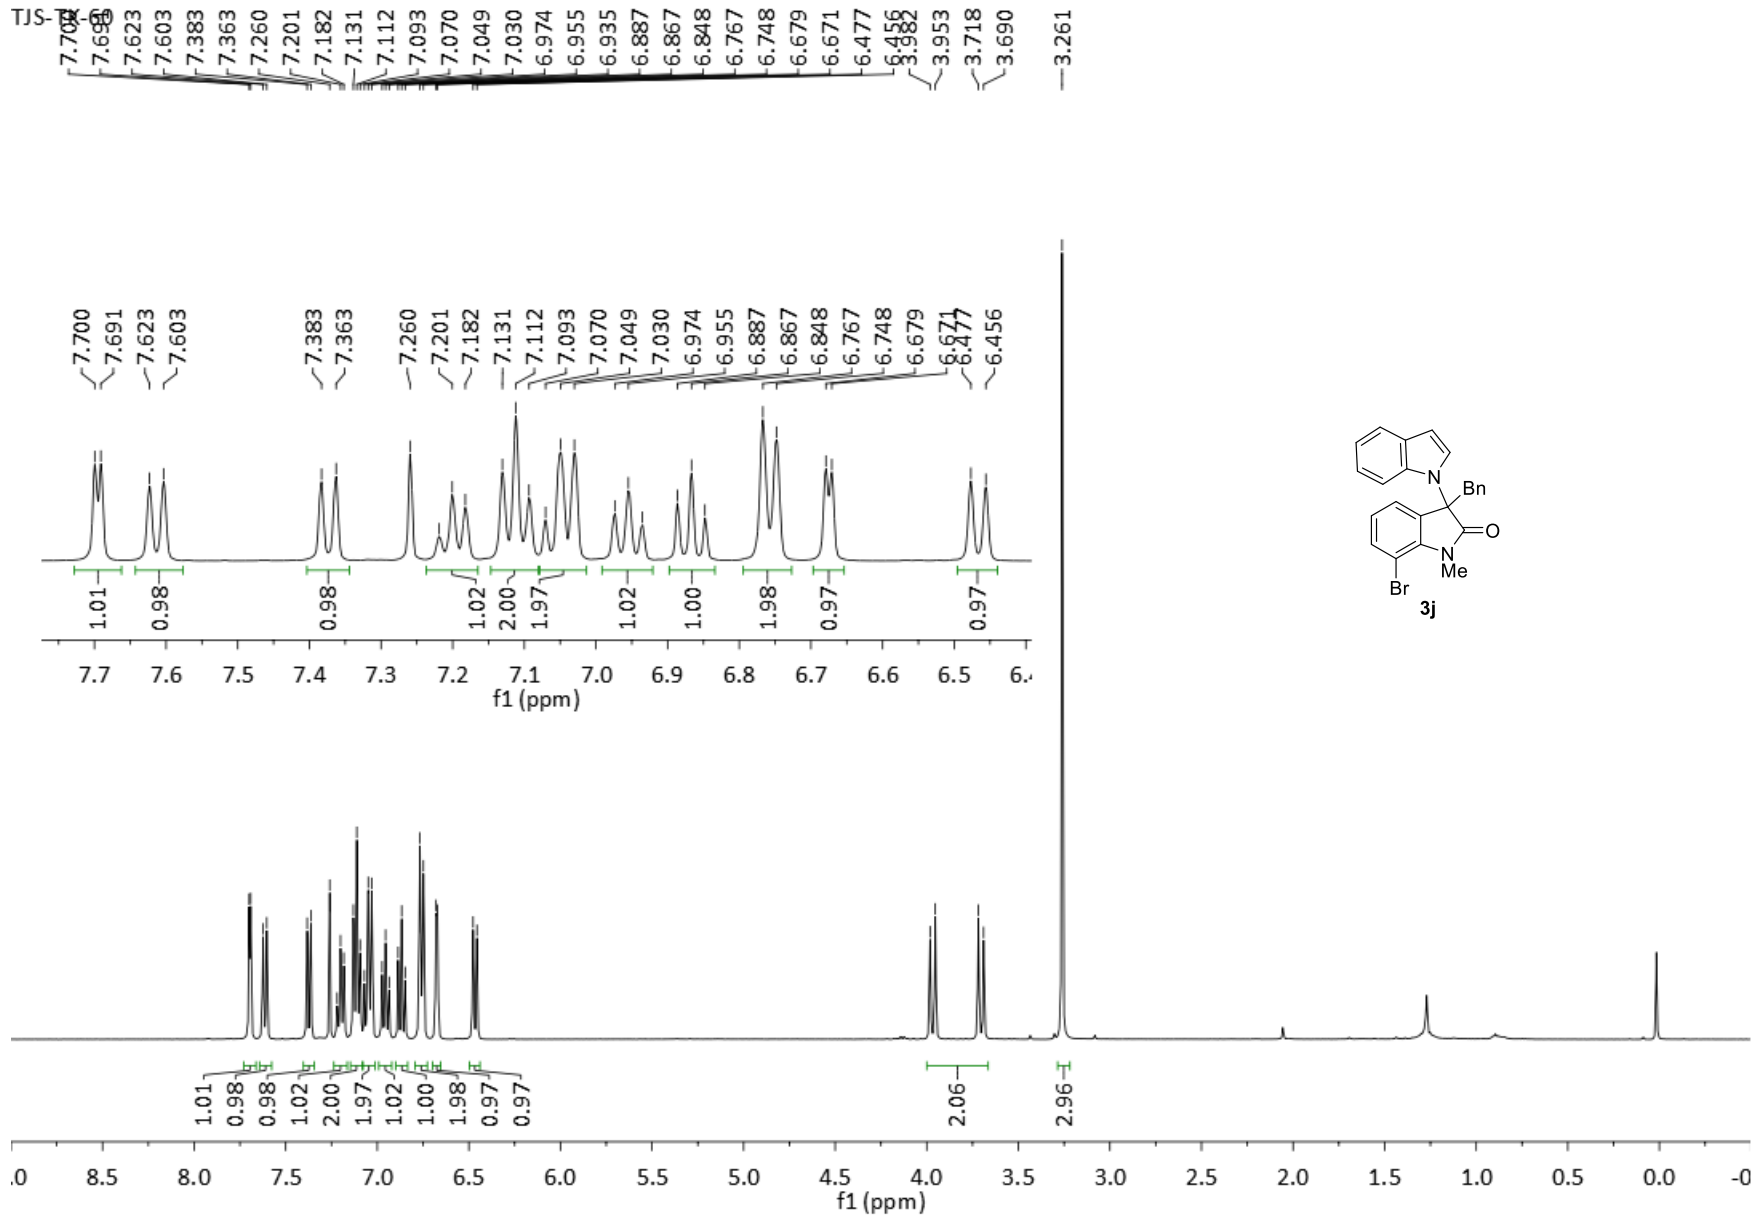

TJS-TK-60

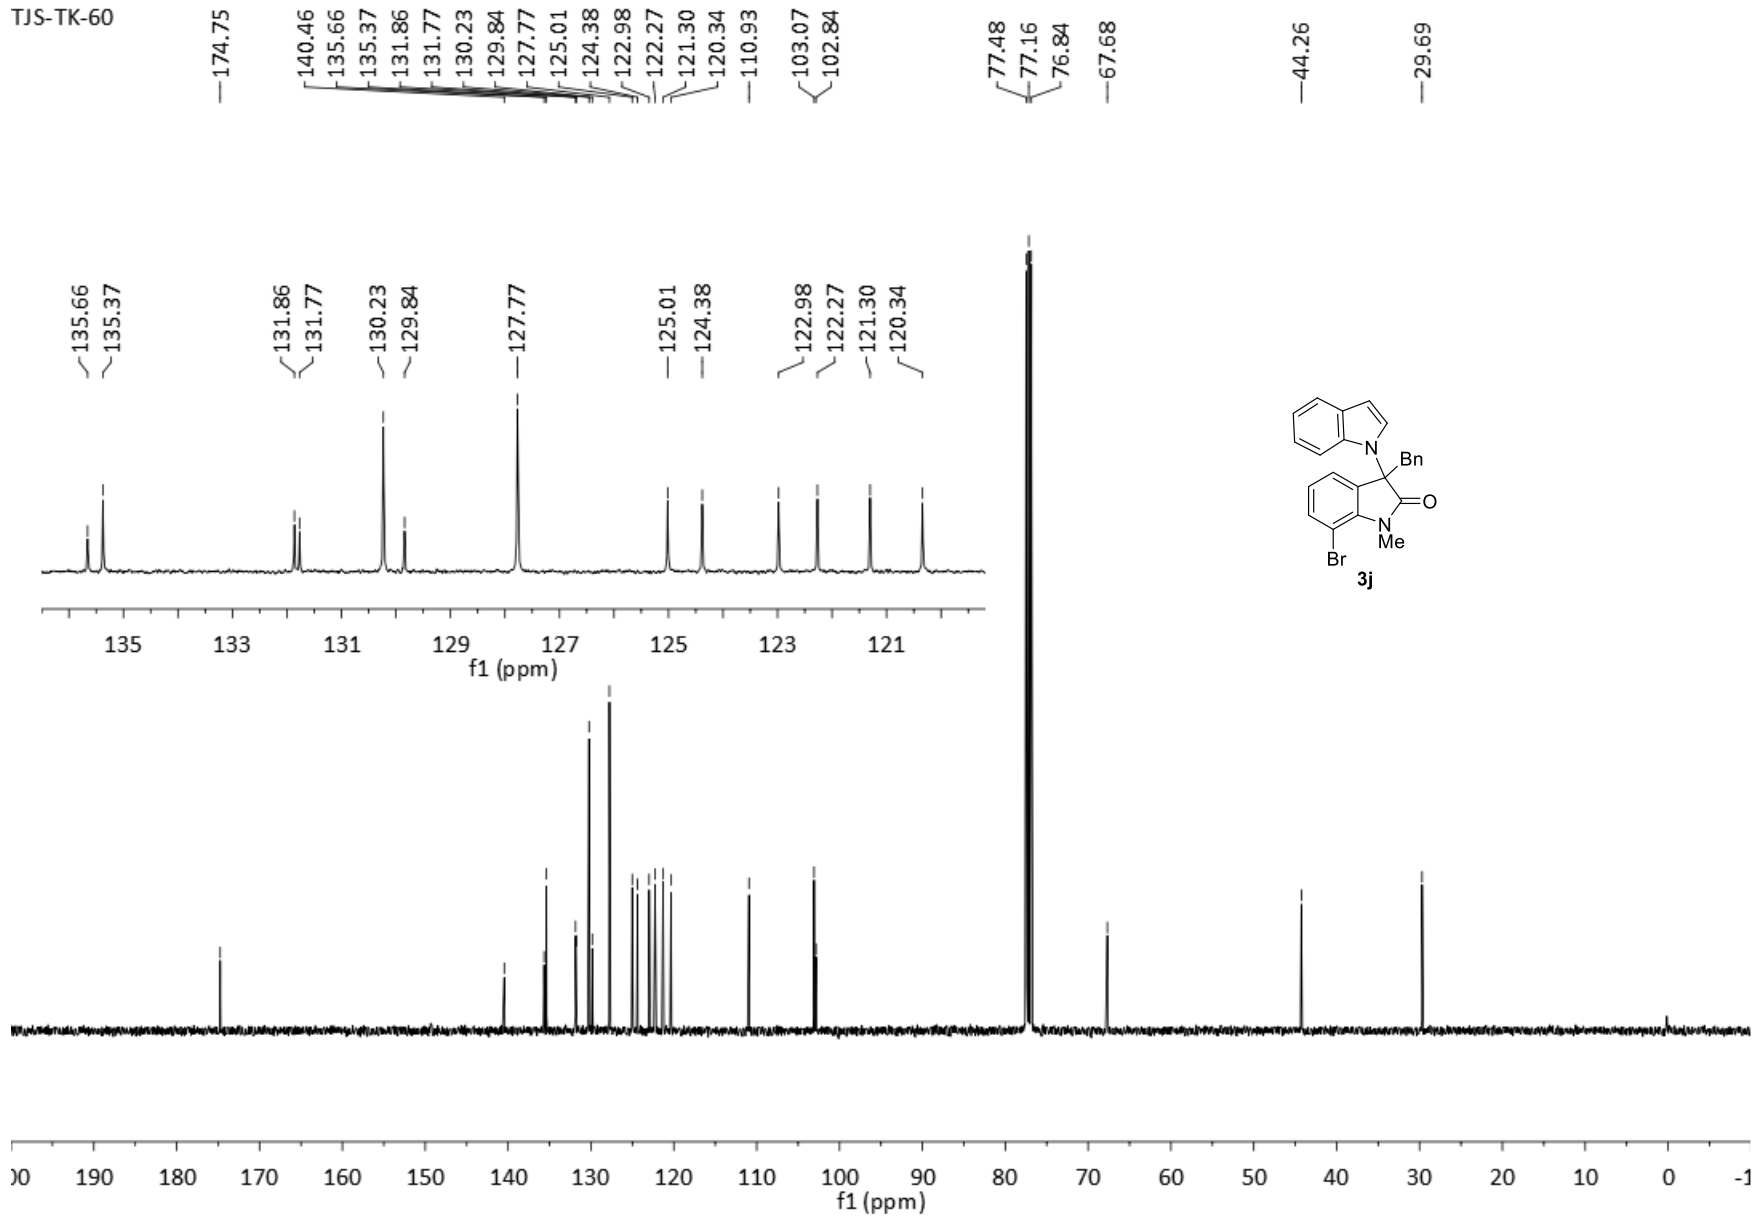

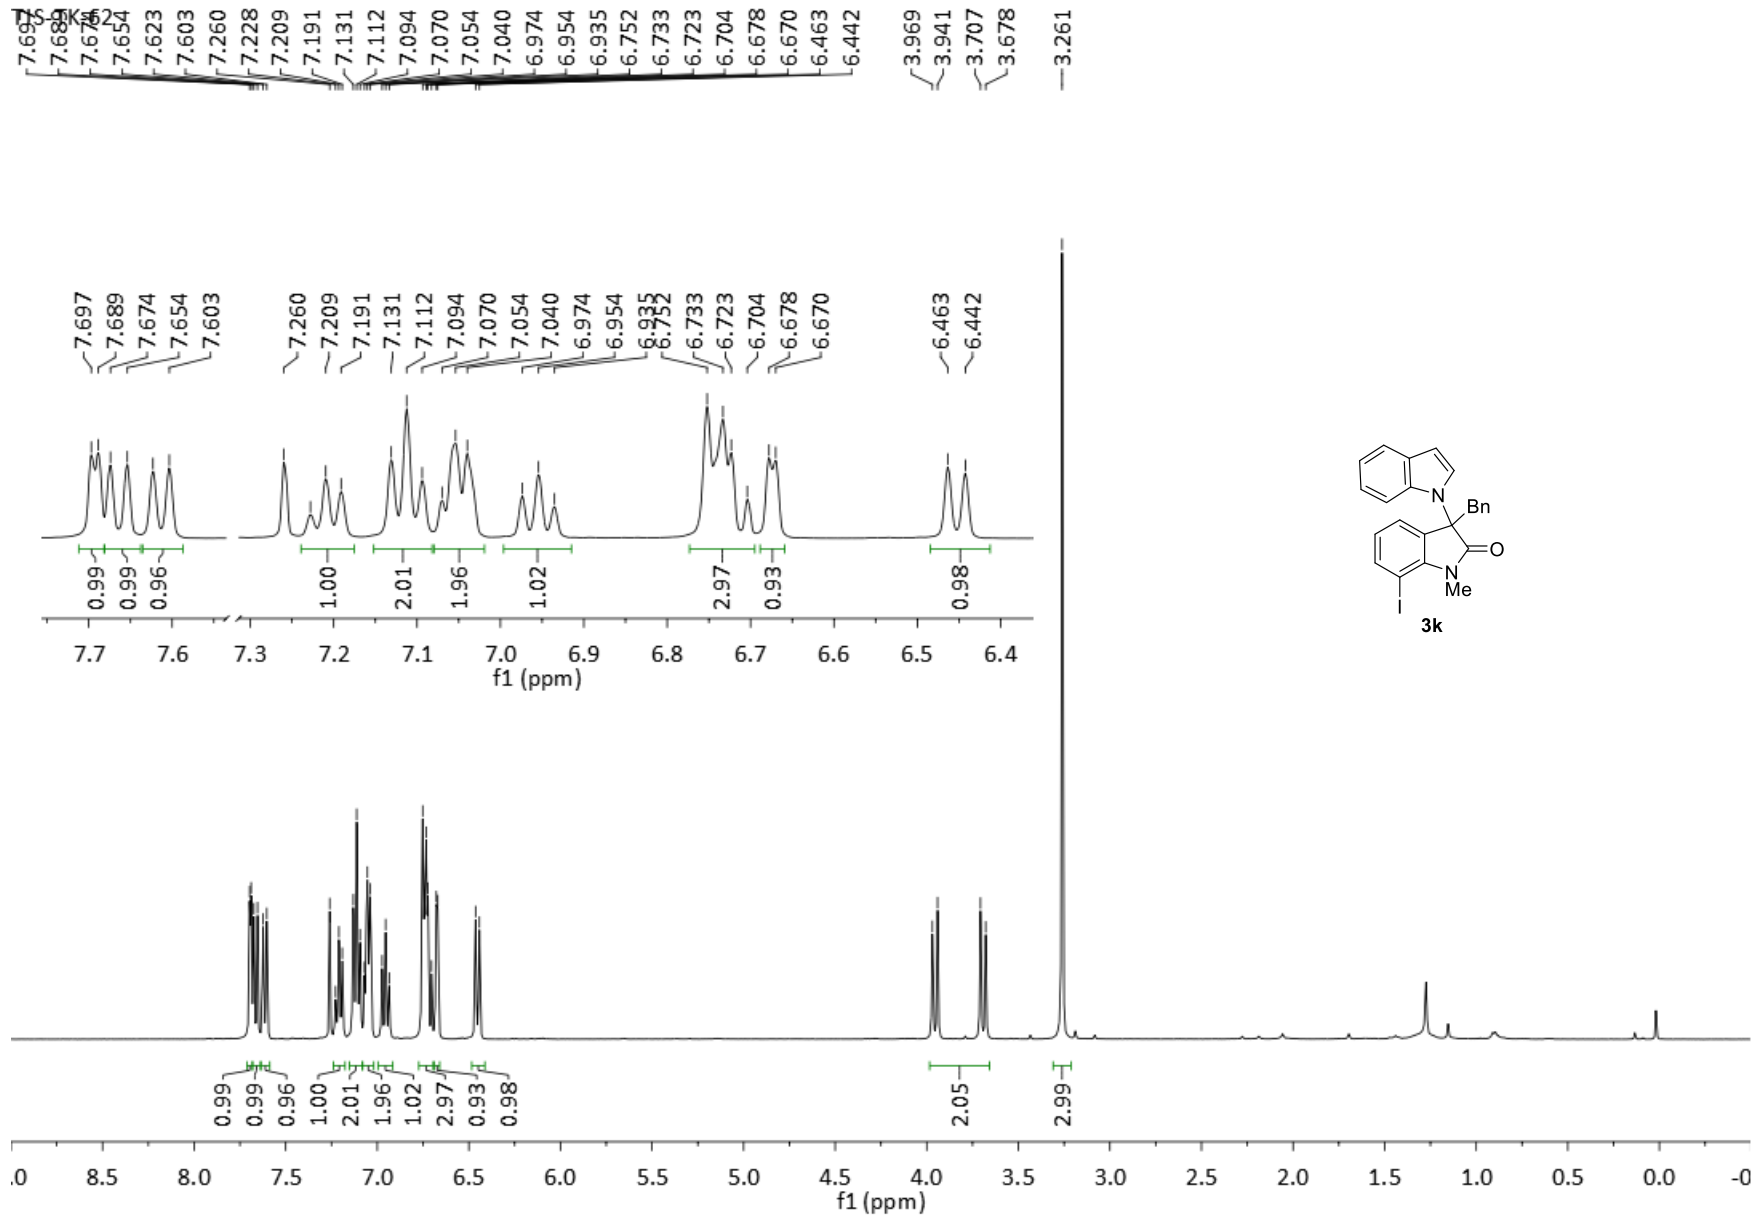

TJS-TK-62

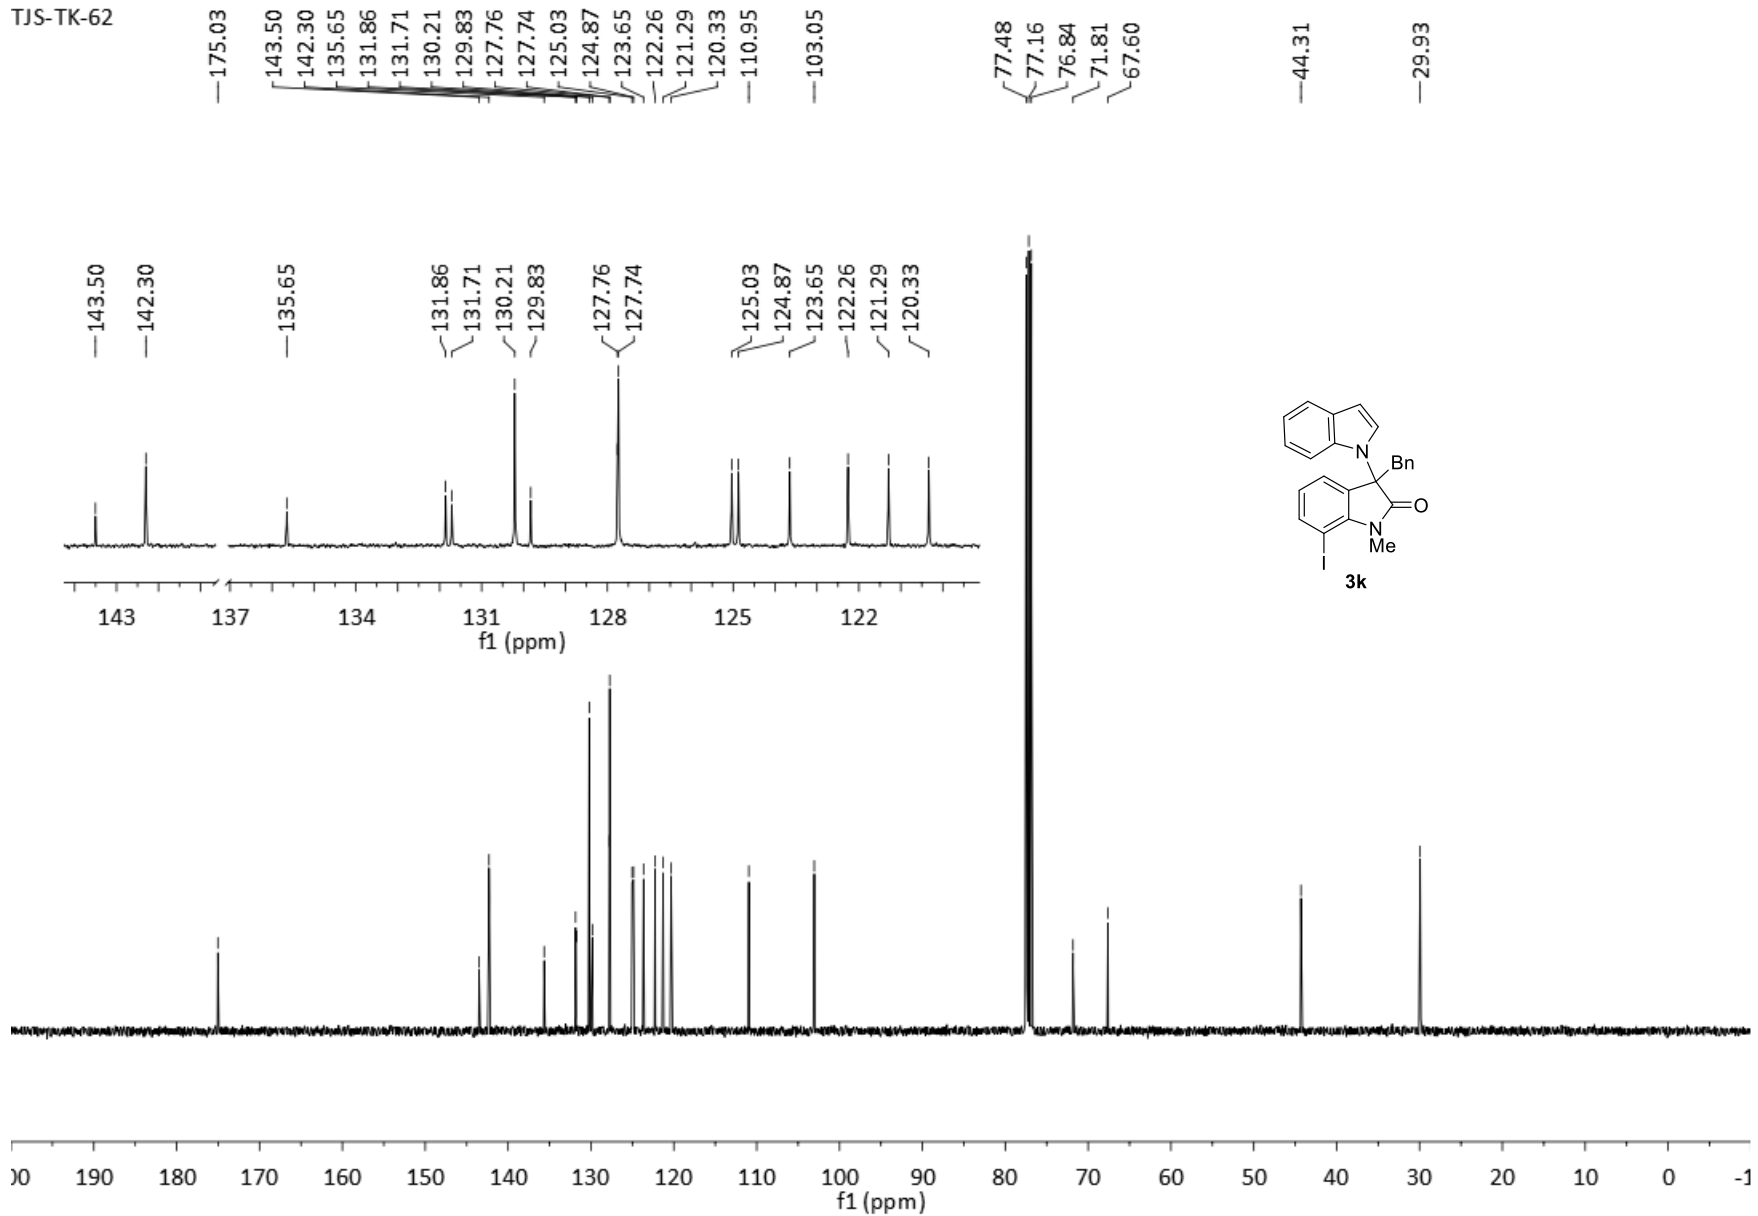



TJS-TL-62

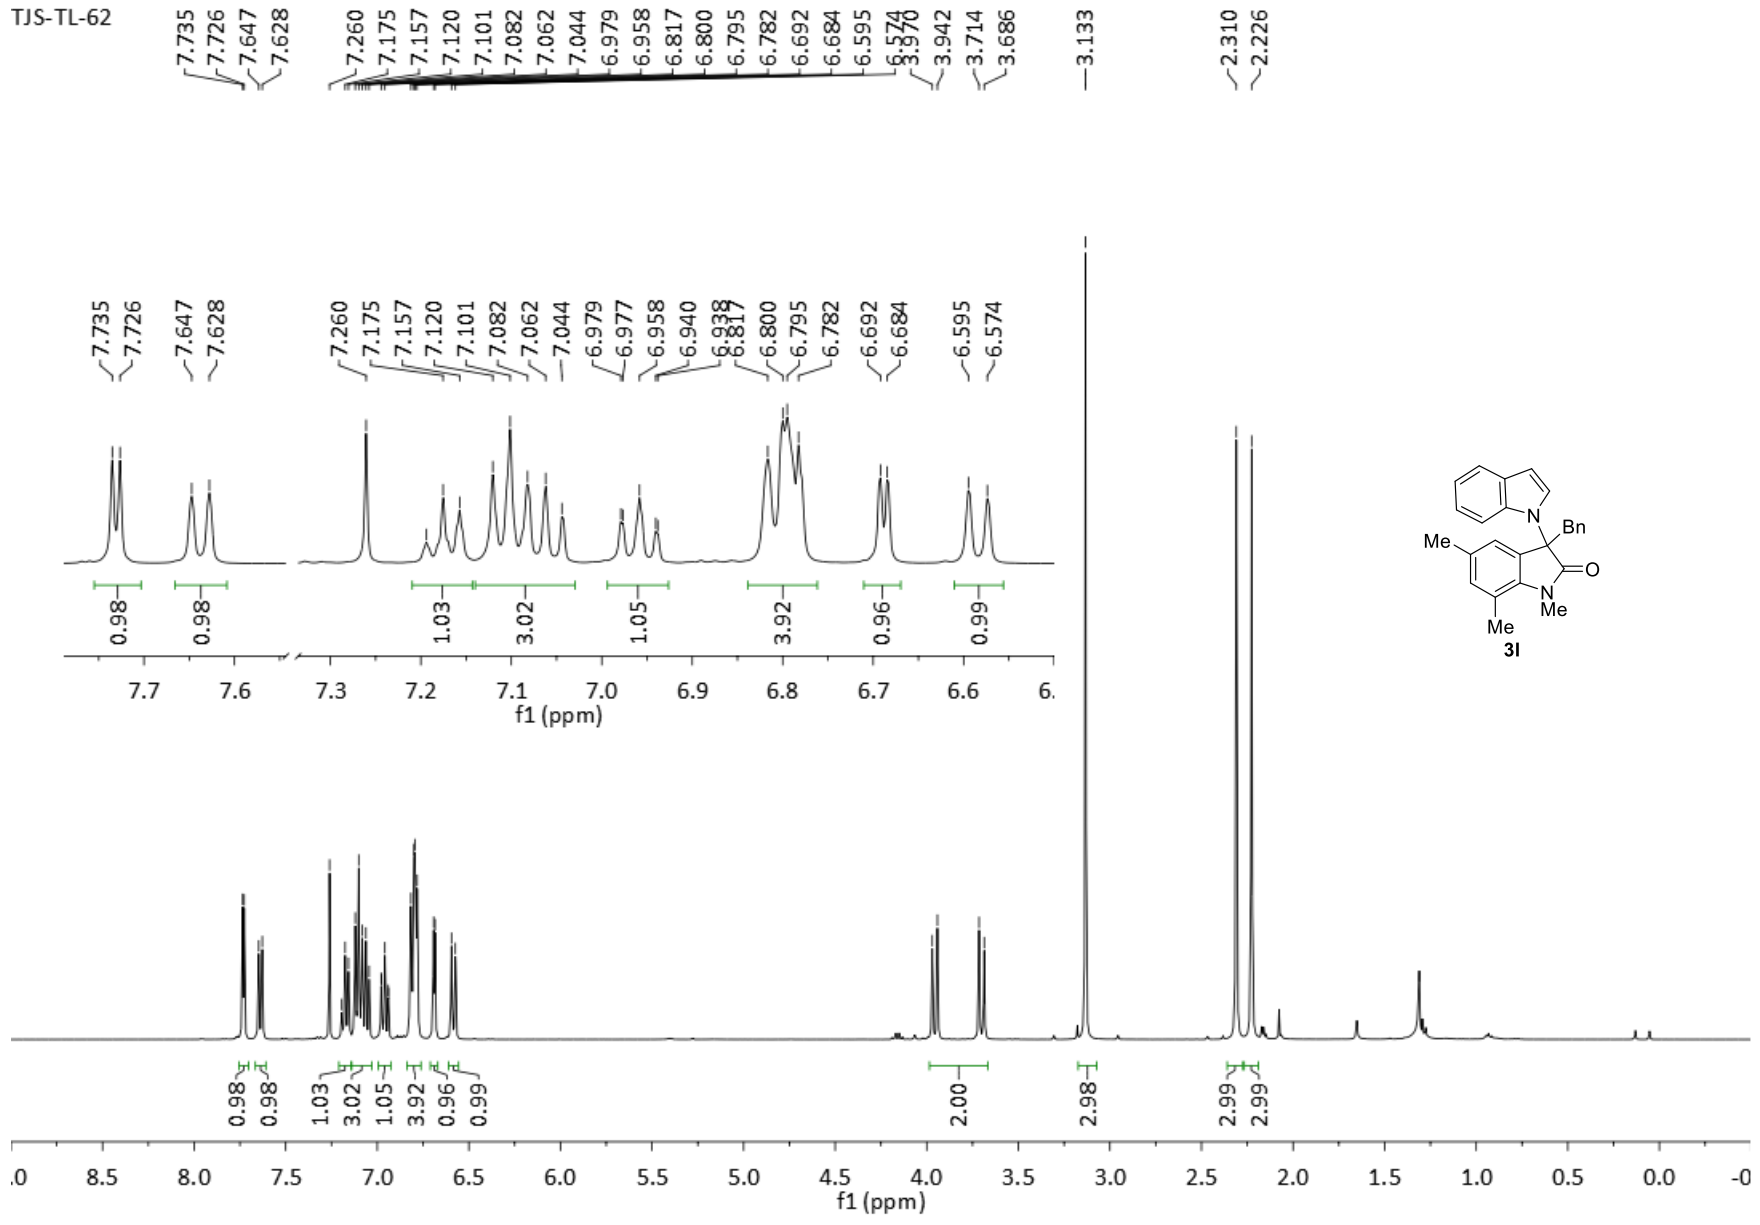

TJS-TL-62

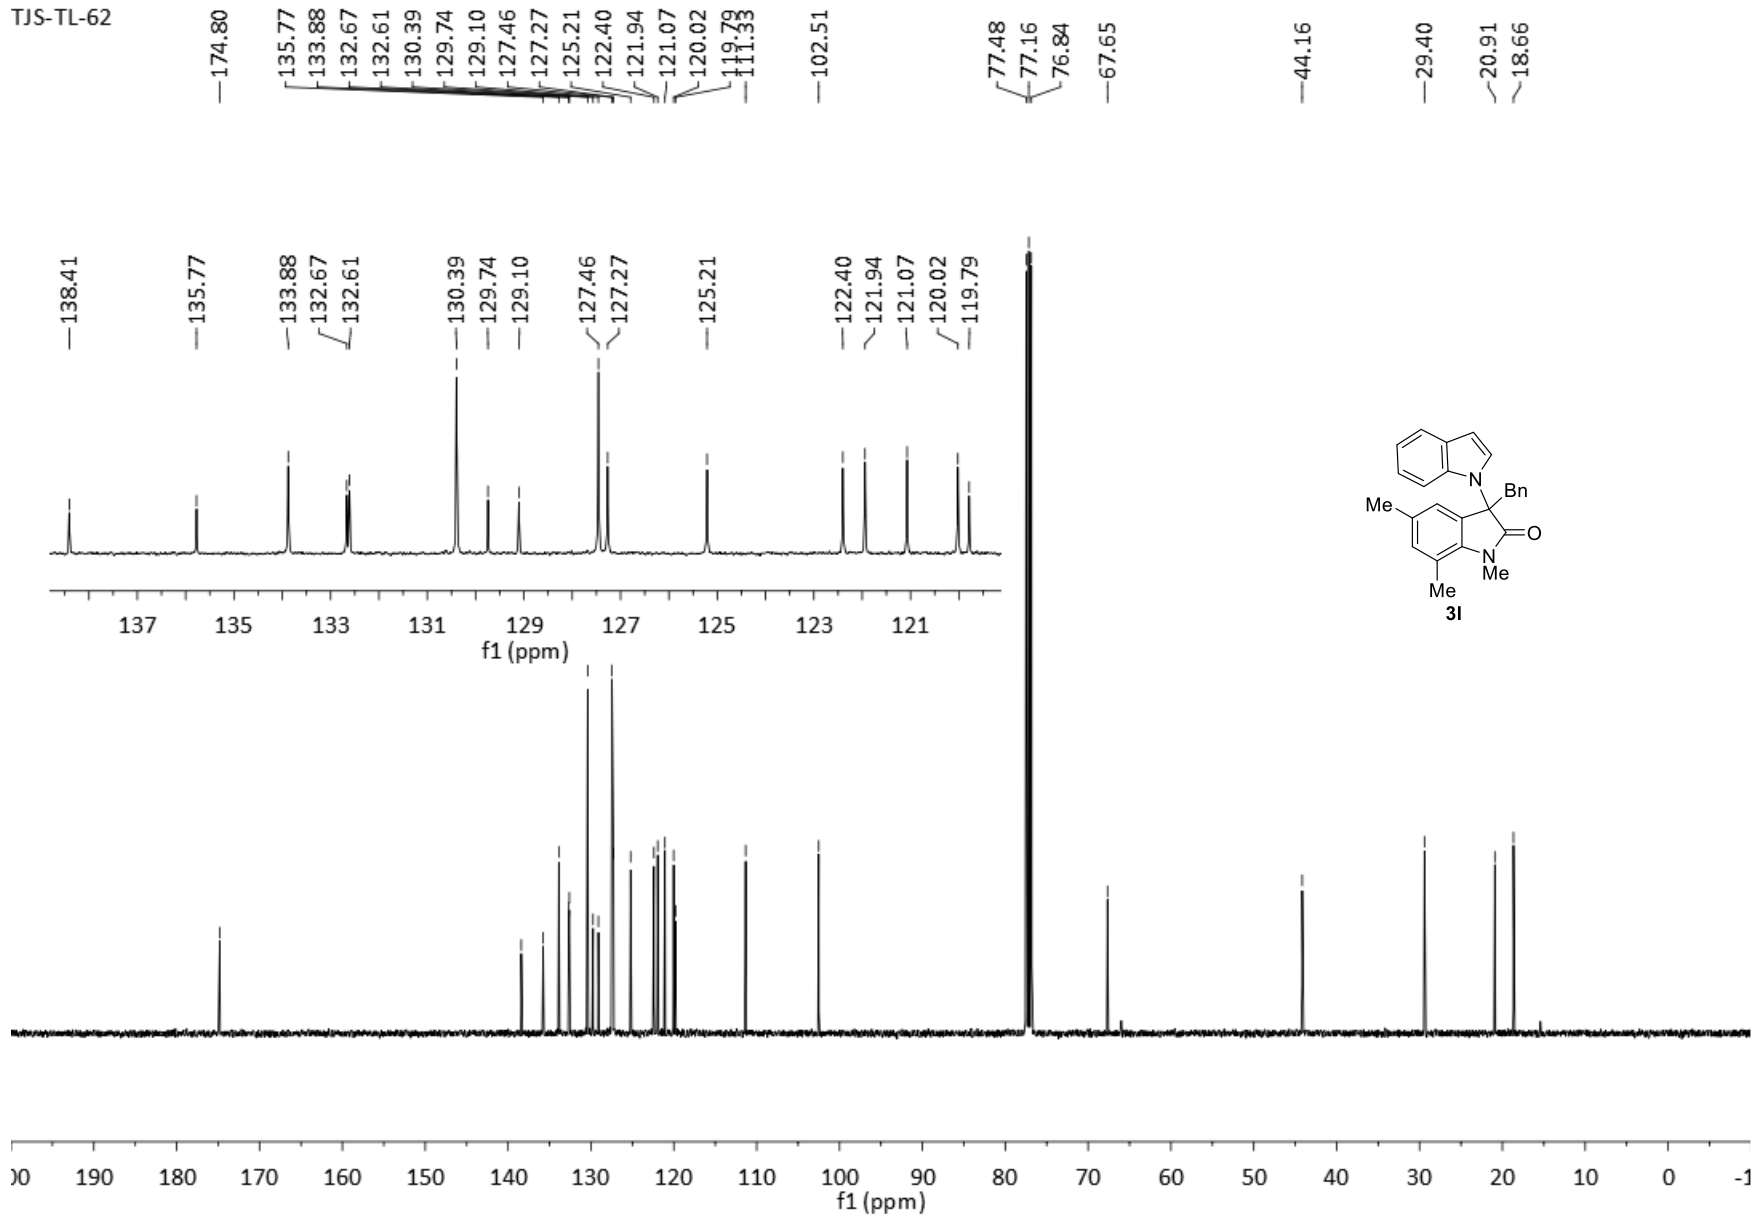

TJS-TK-78

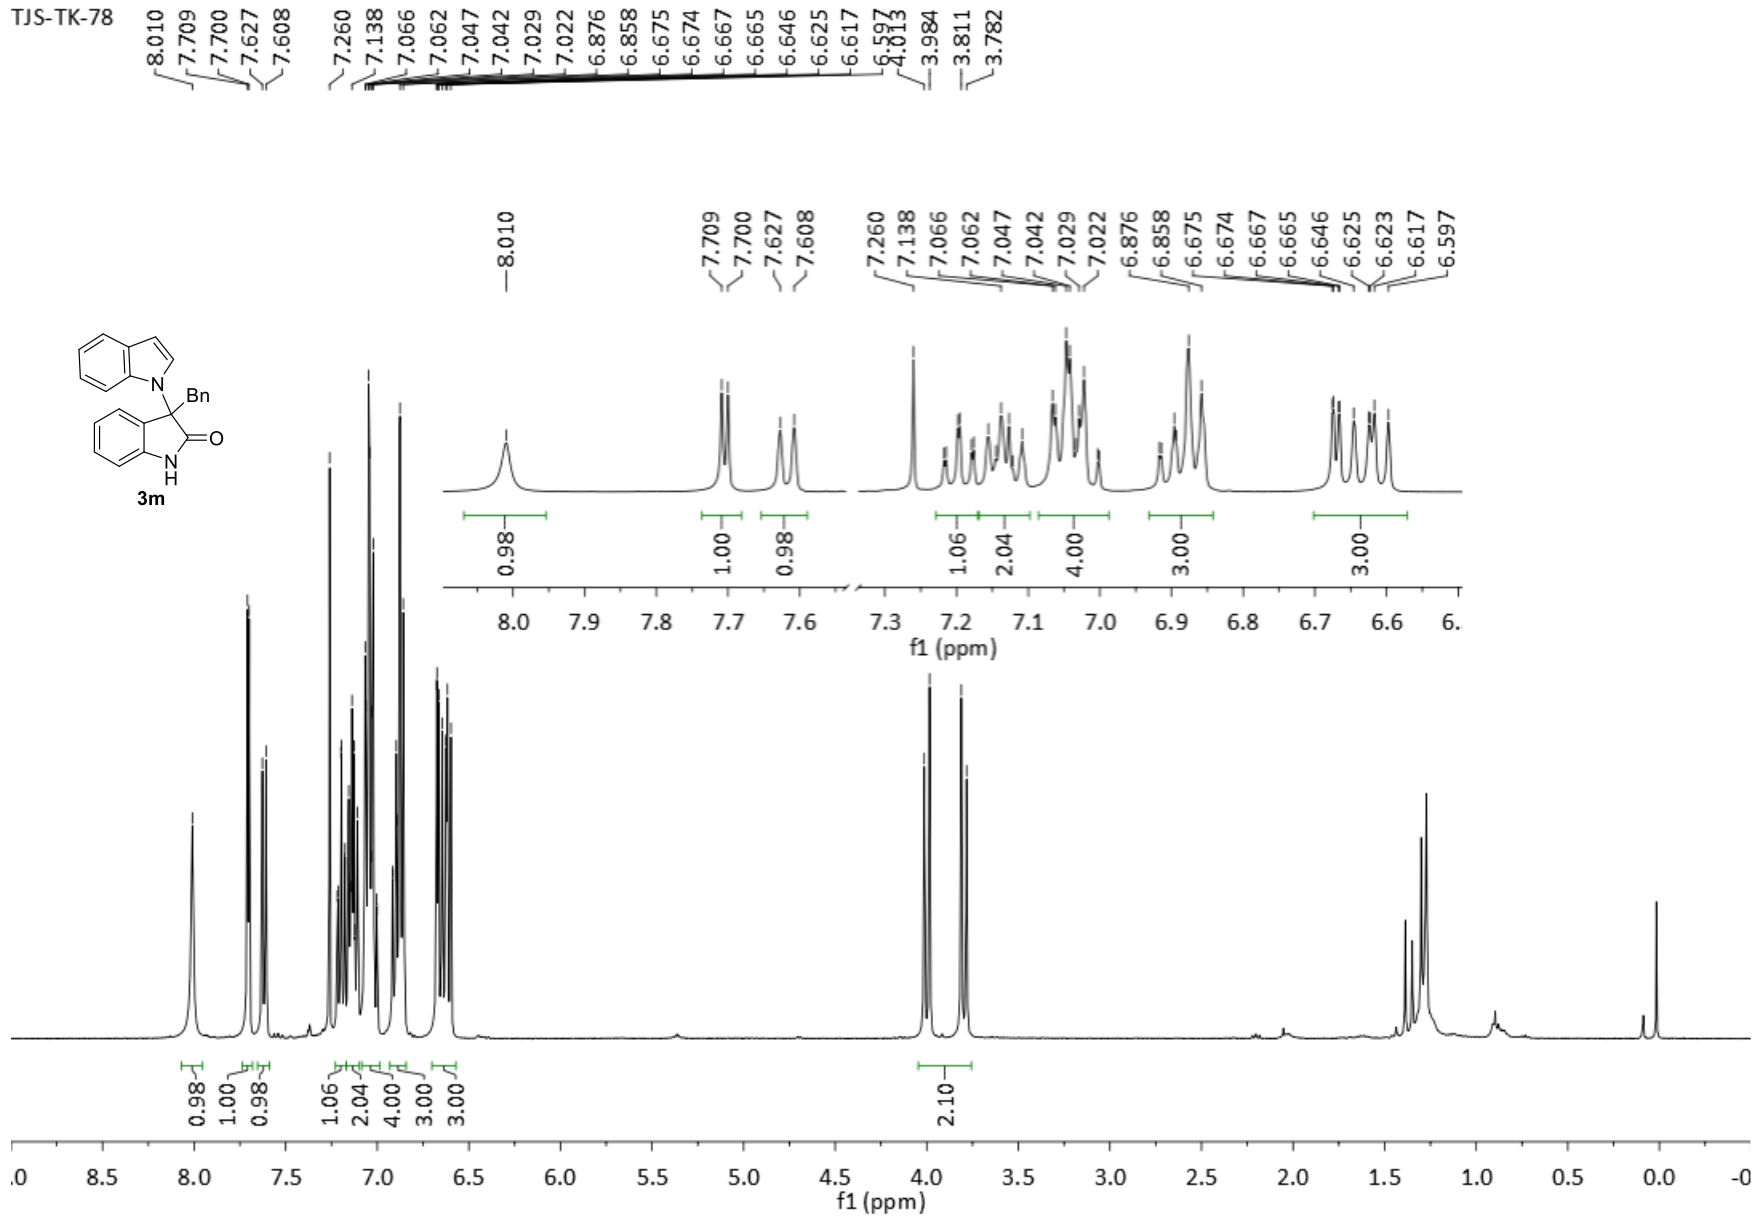

TJS-TK-78

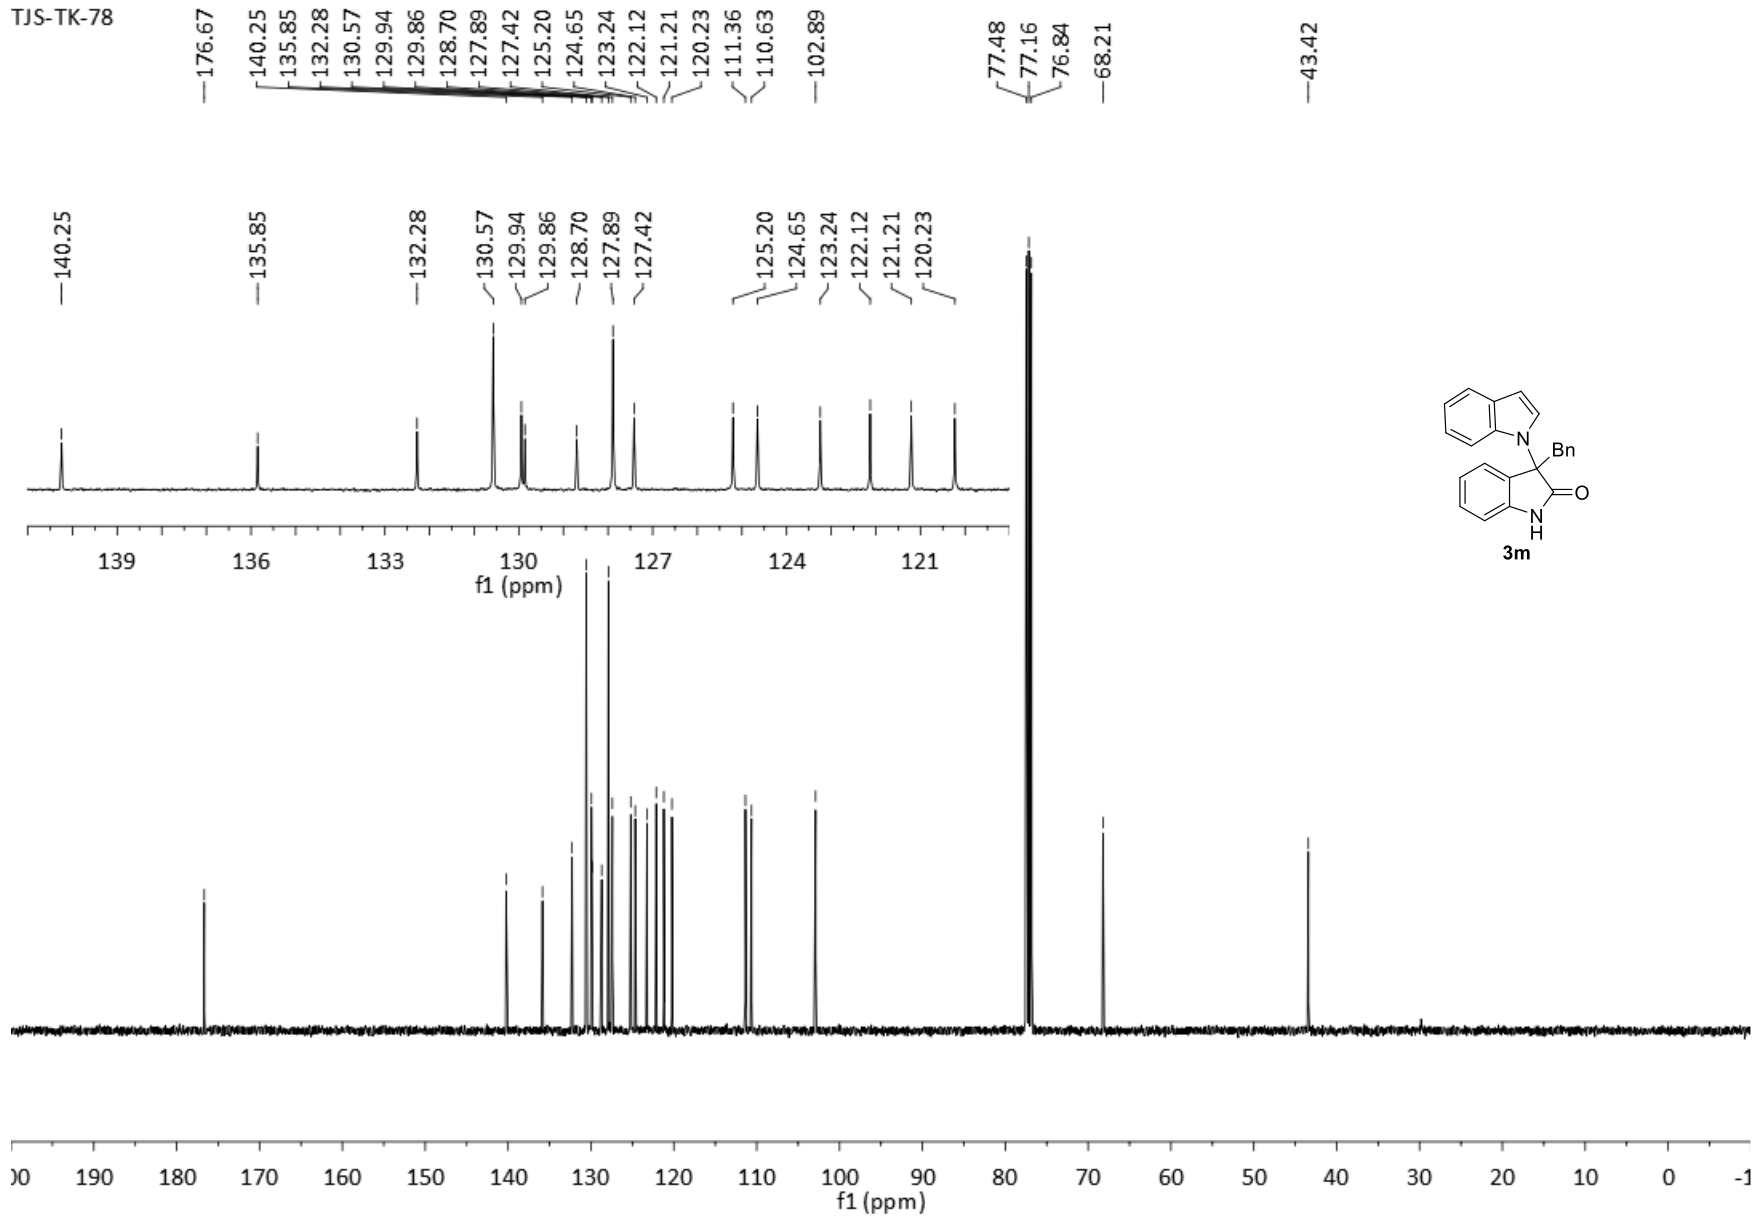

TJS-TK-76

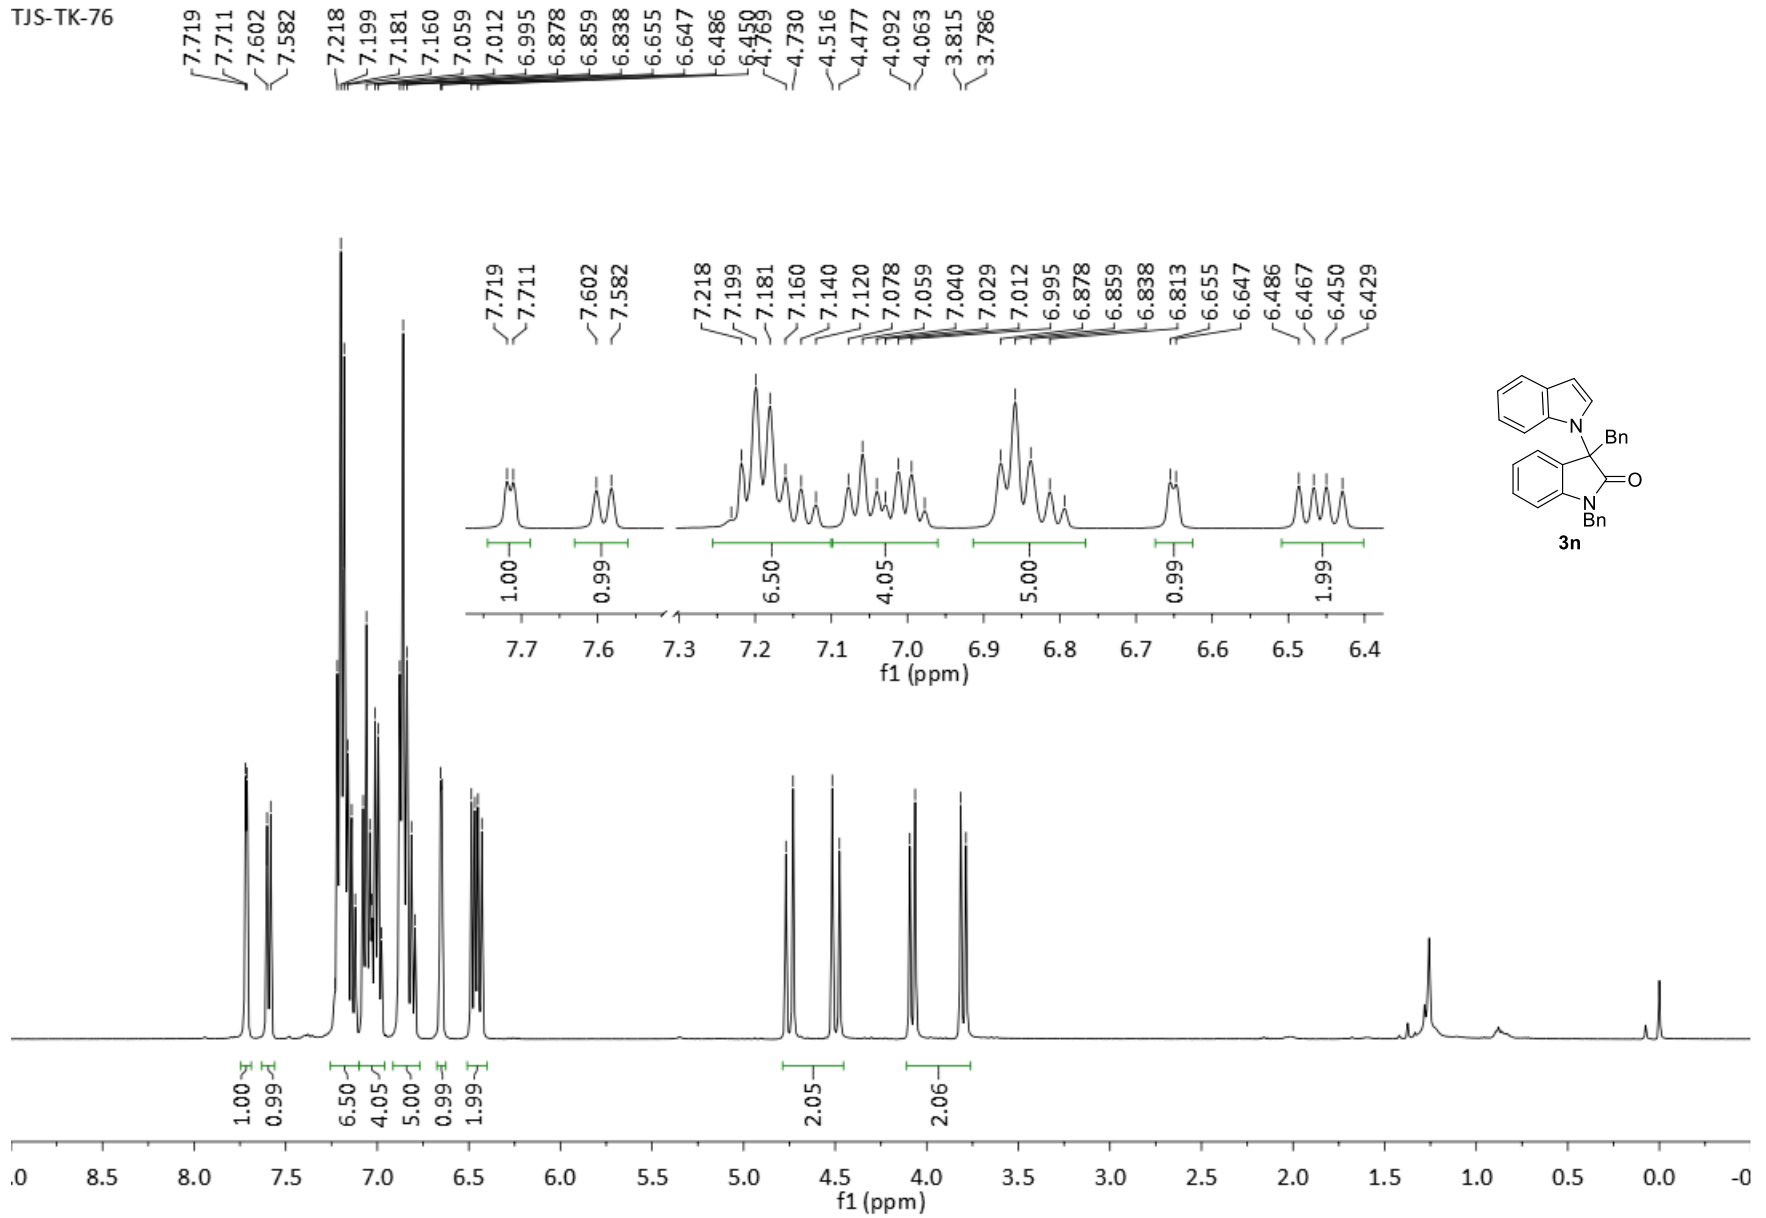

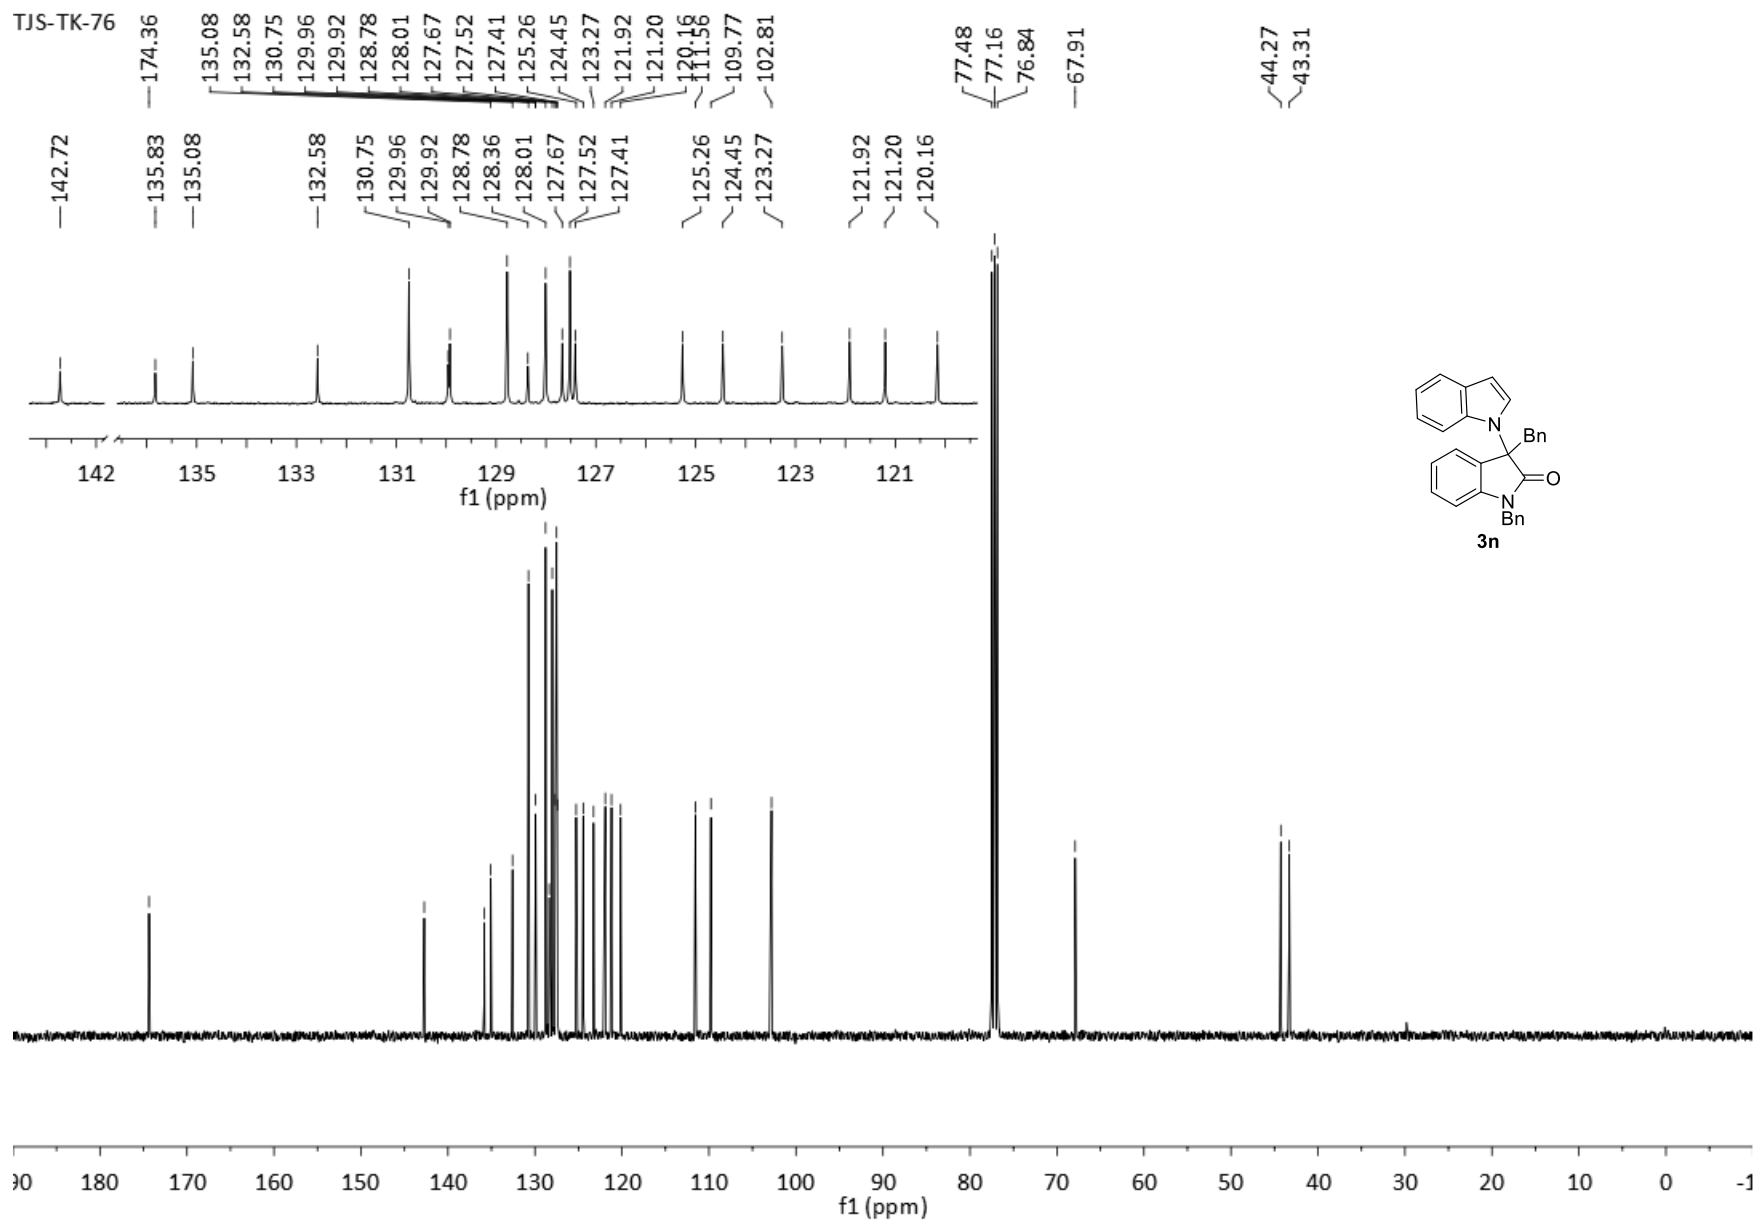

TJS-TL-66

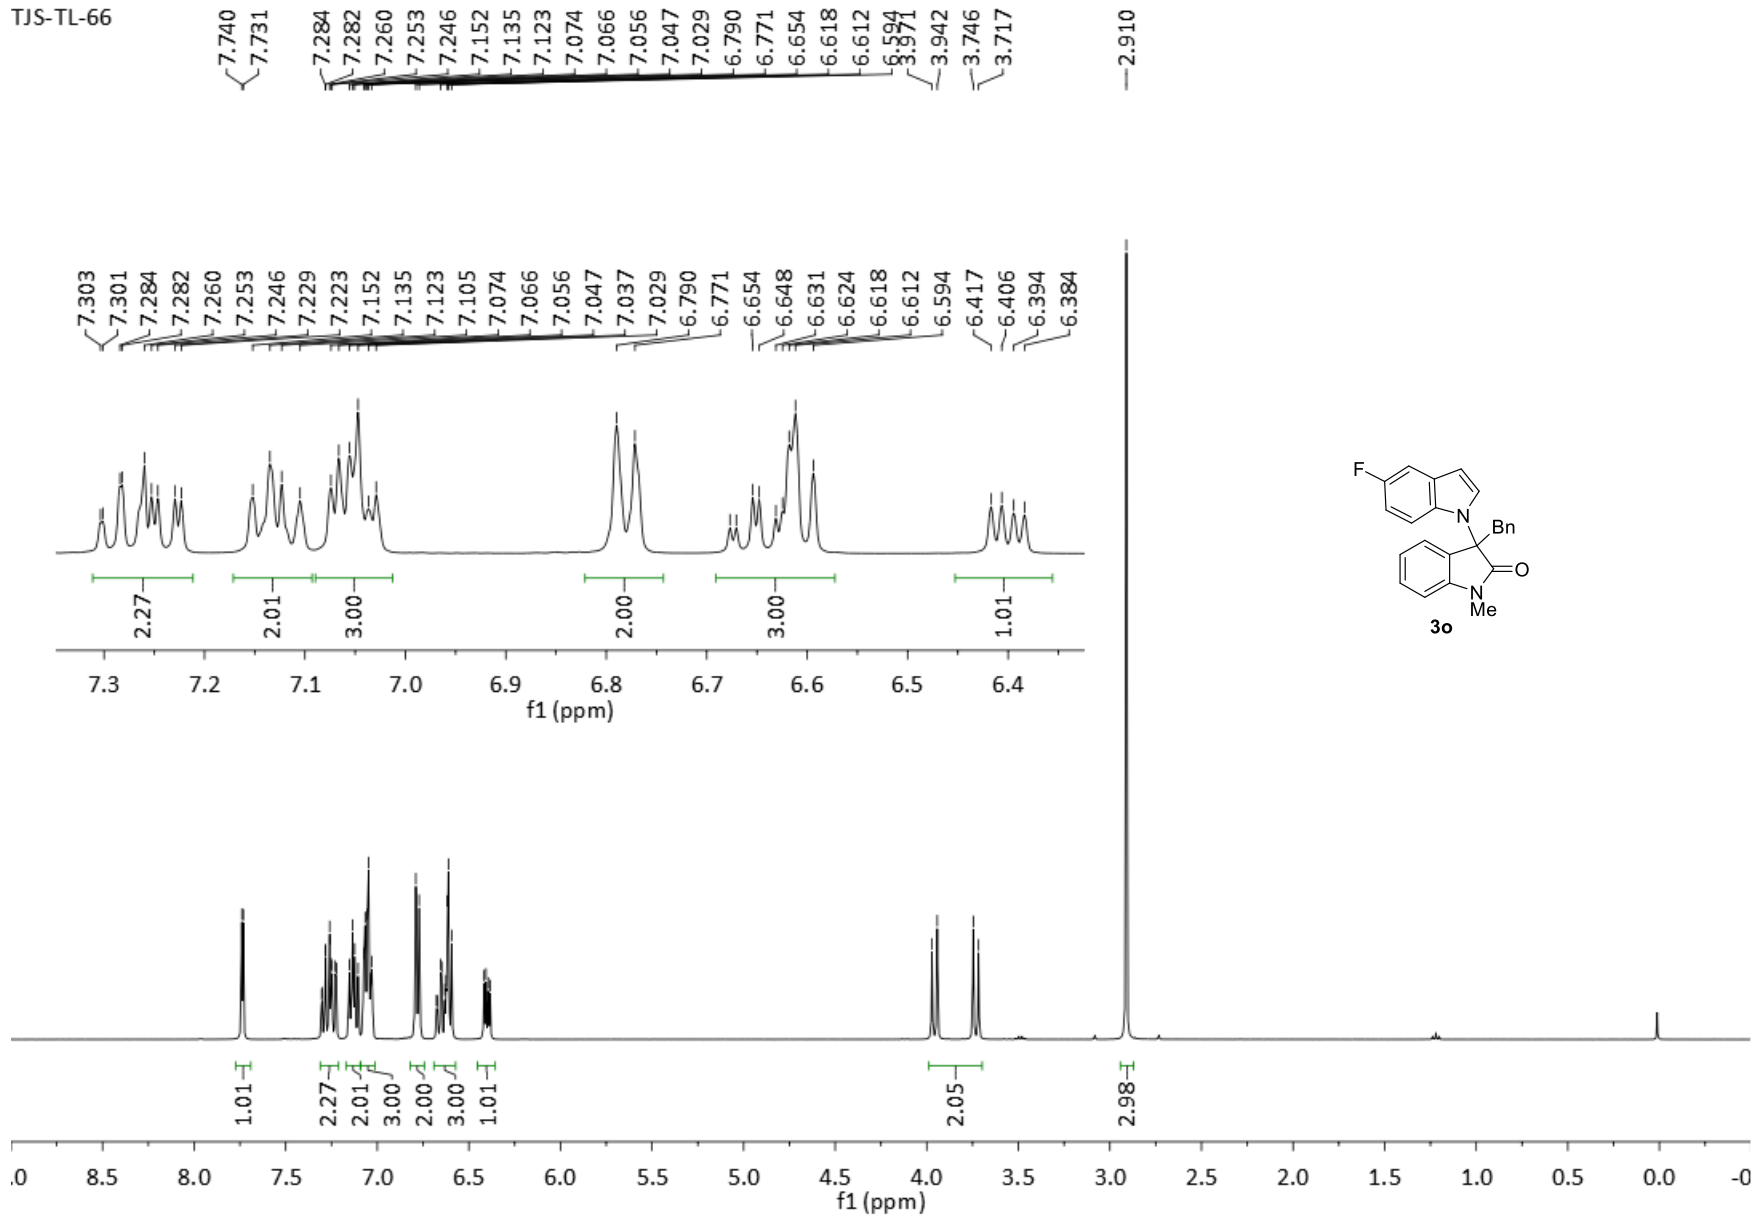

TJS-TL-66

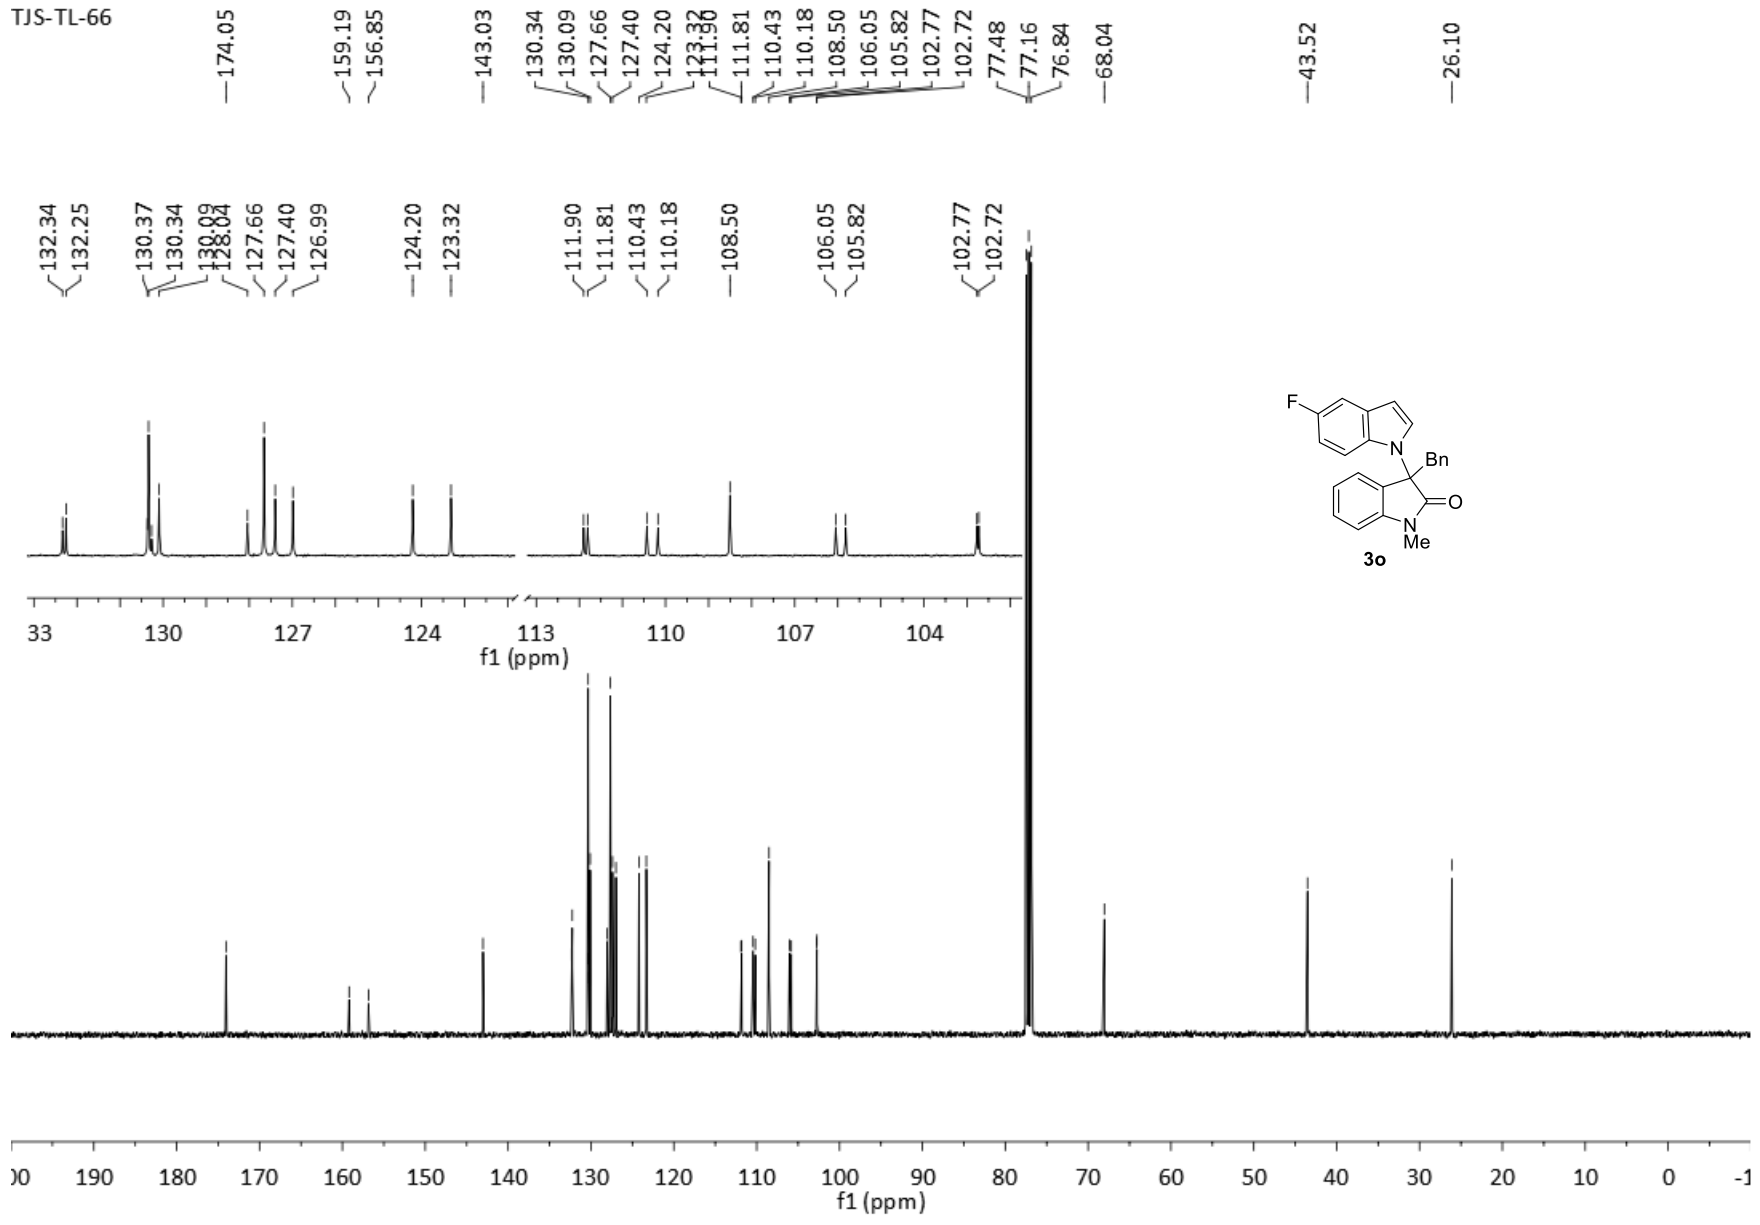



TJS-TL-66

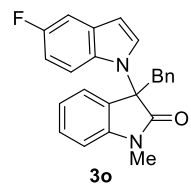

---124.690

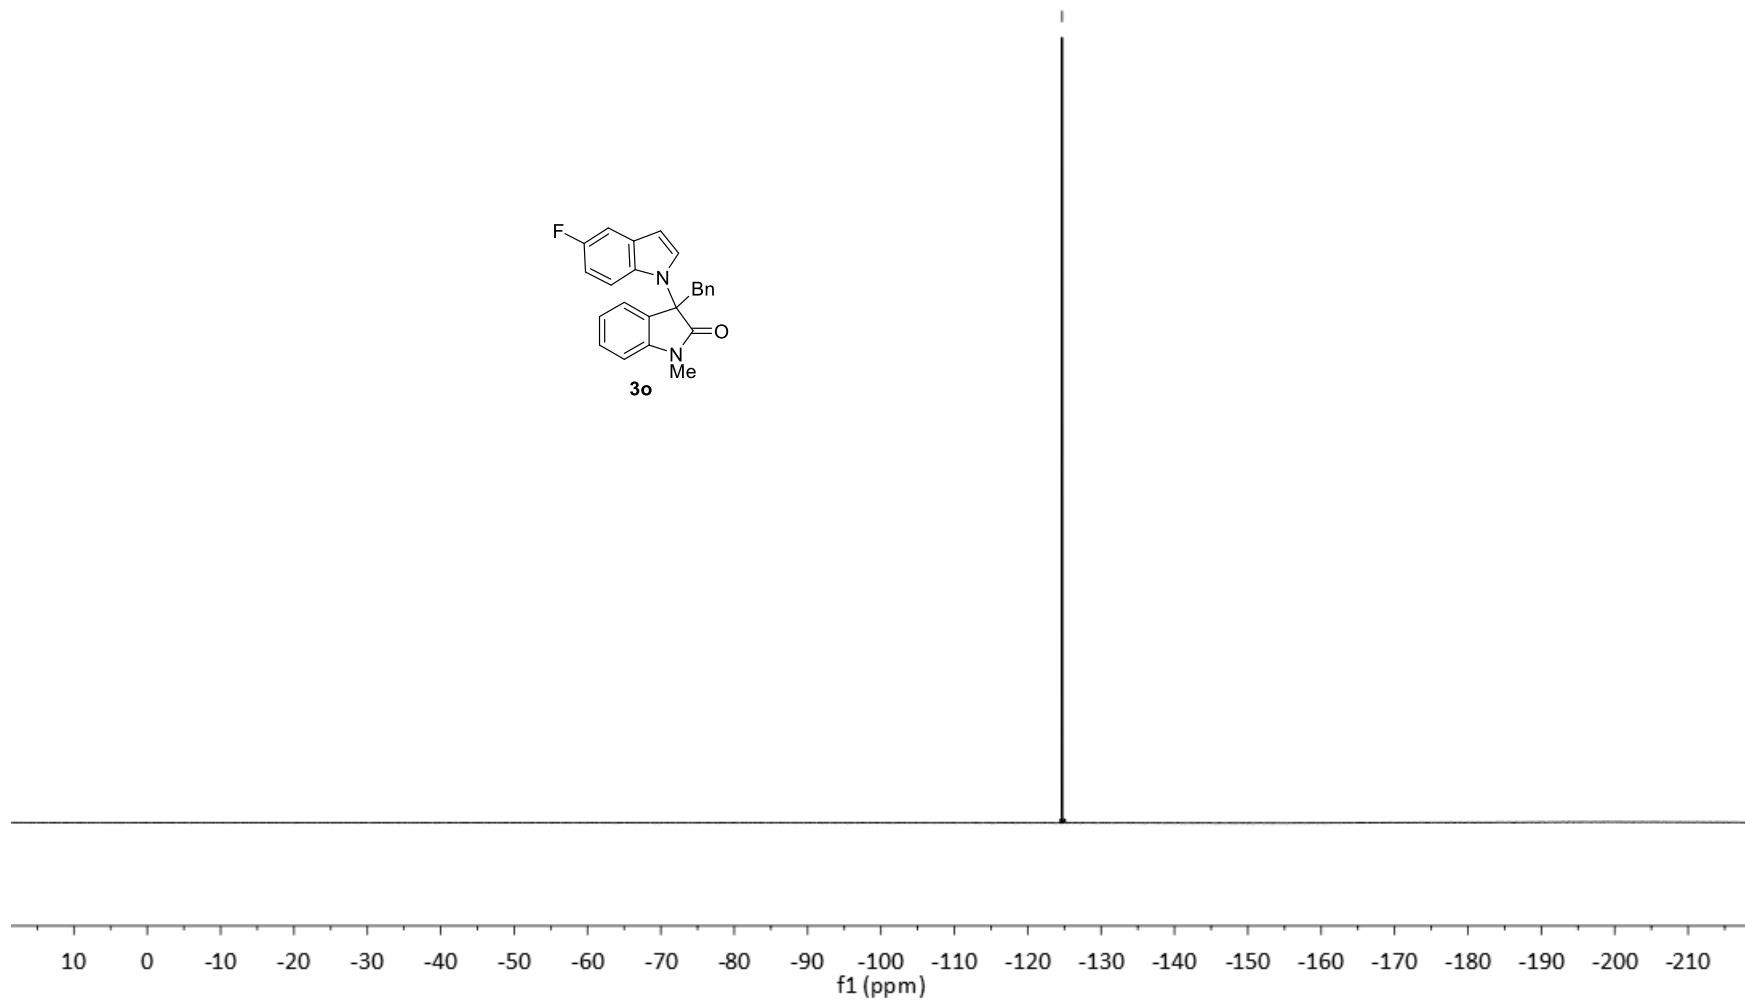

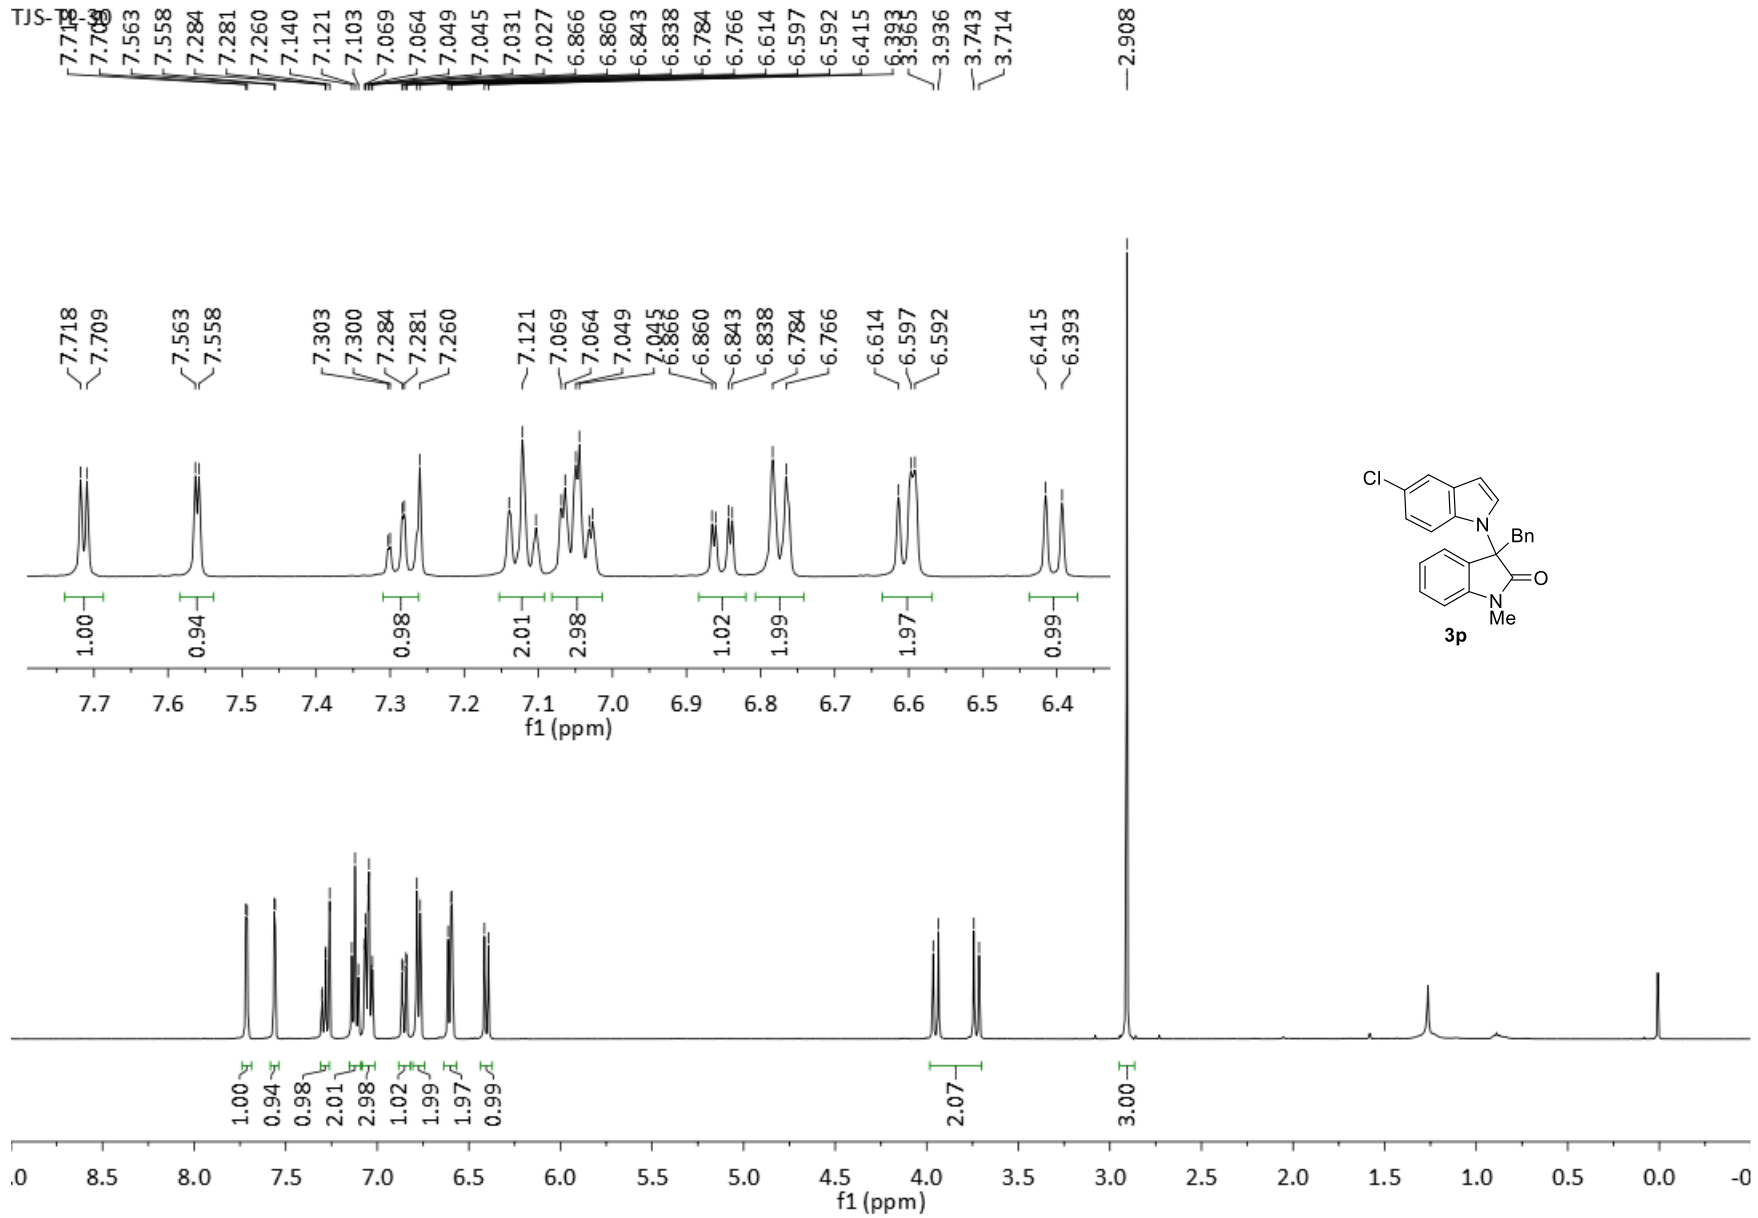

TJS-TL-30

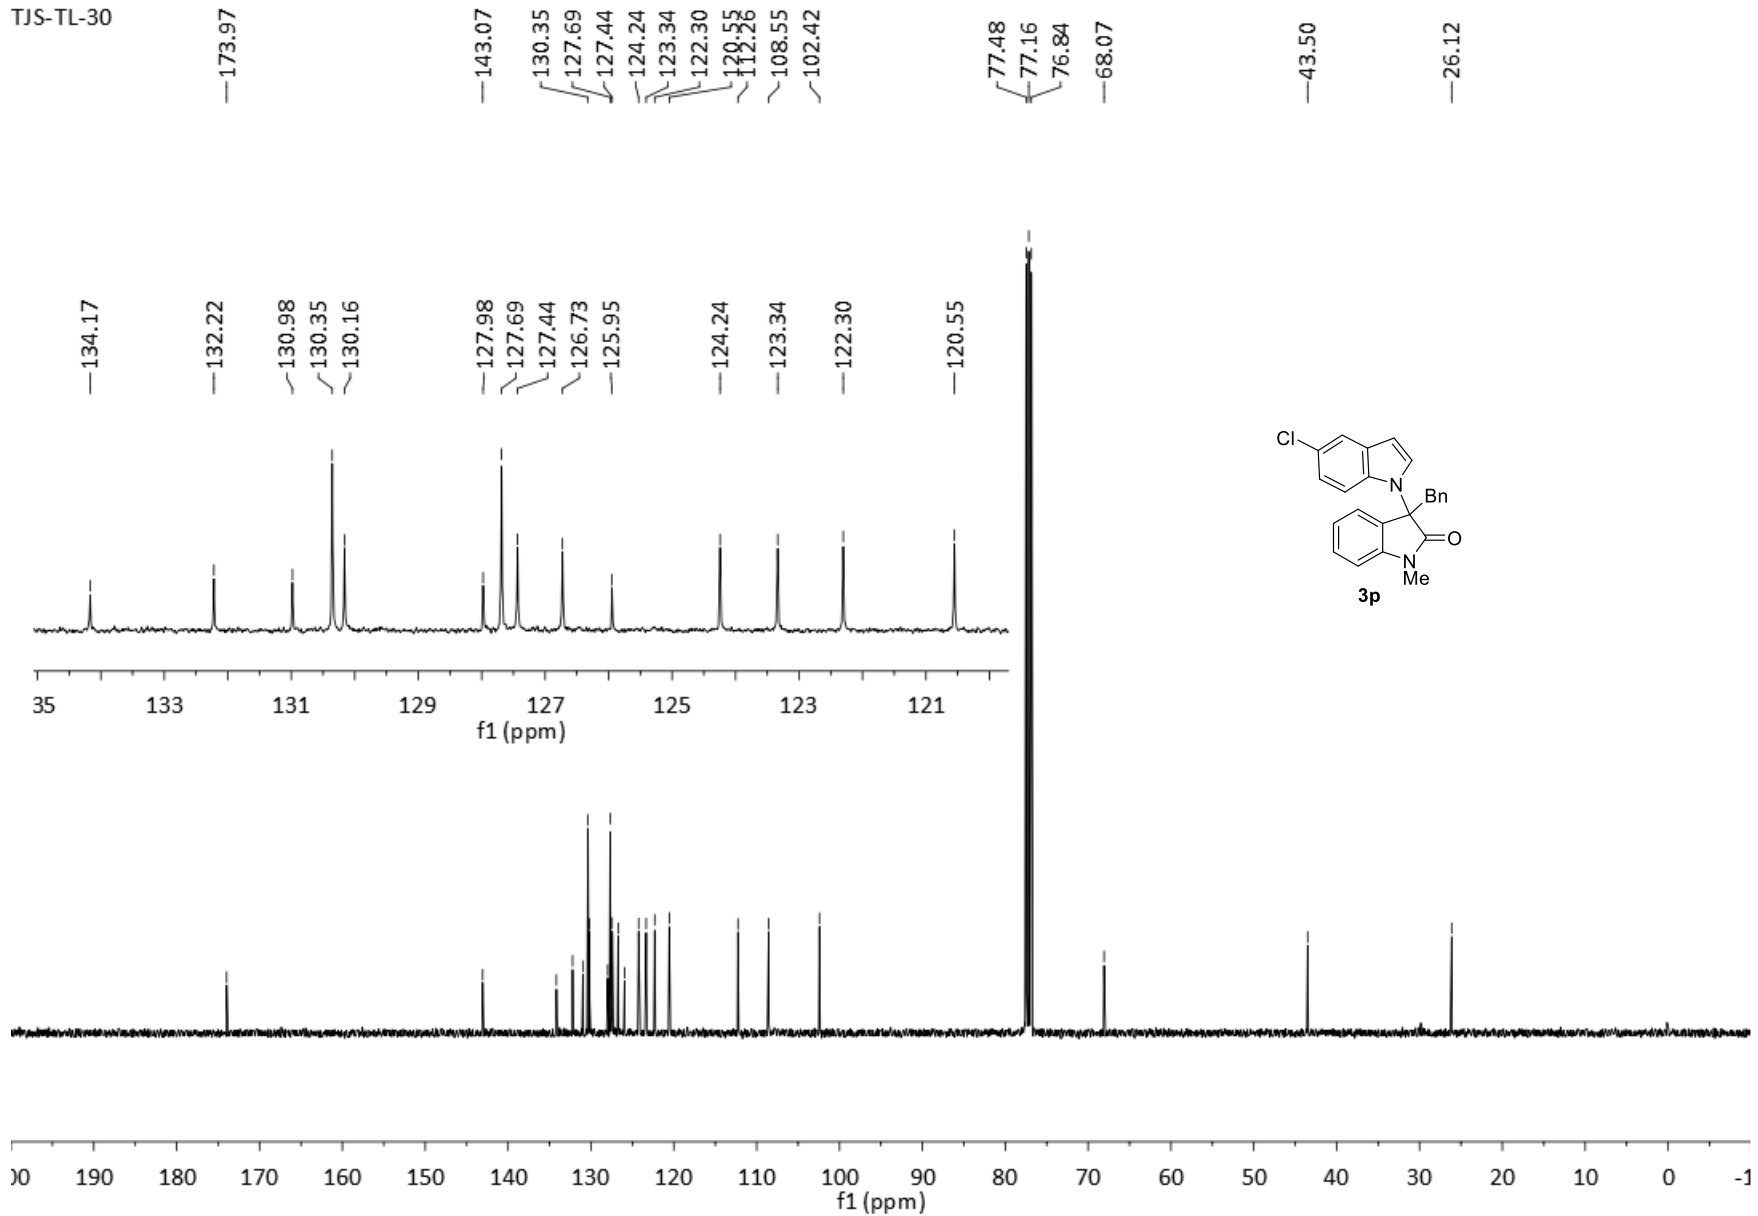

TJS-TL-68

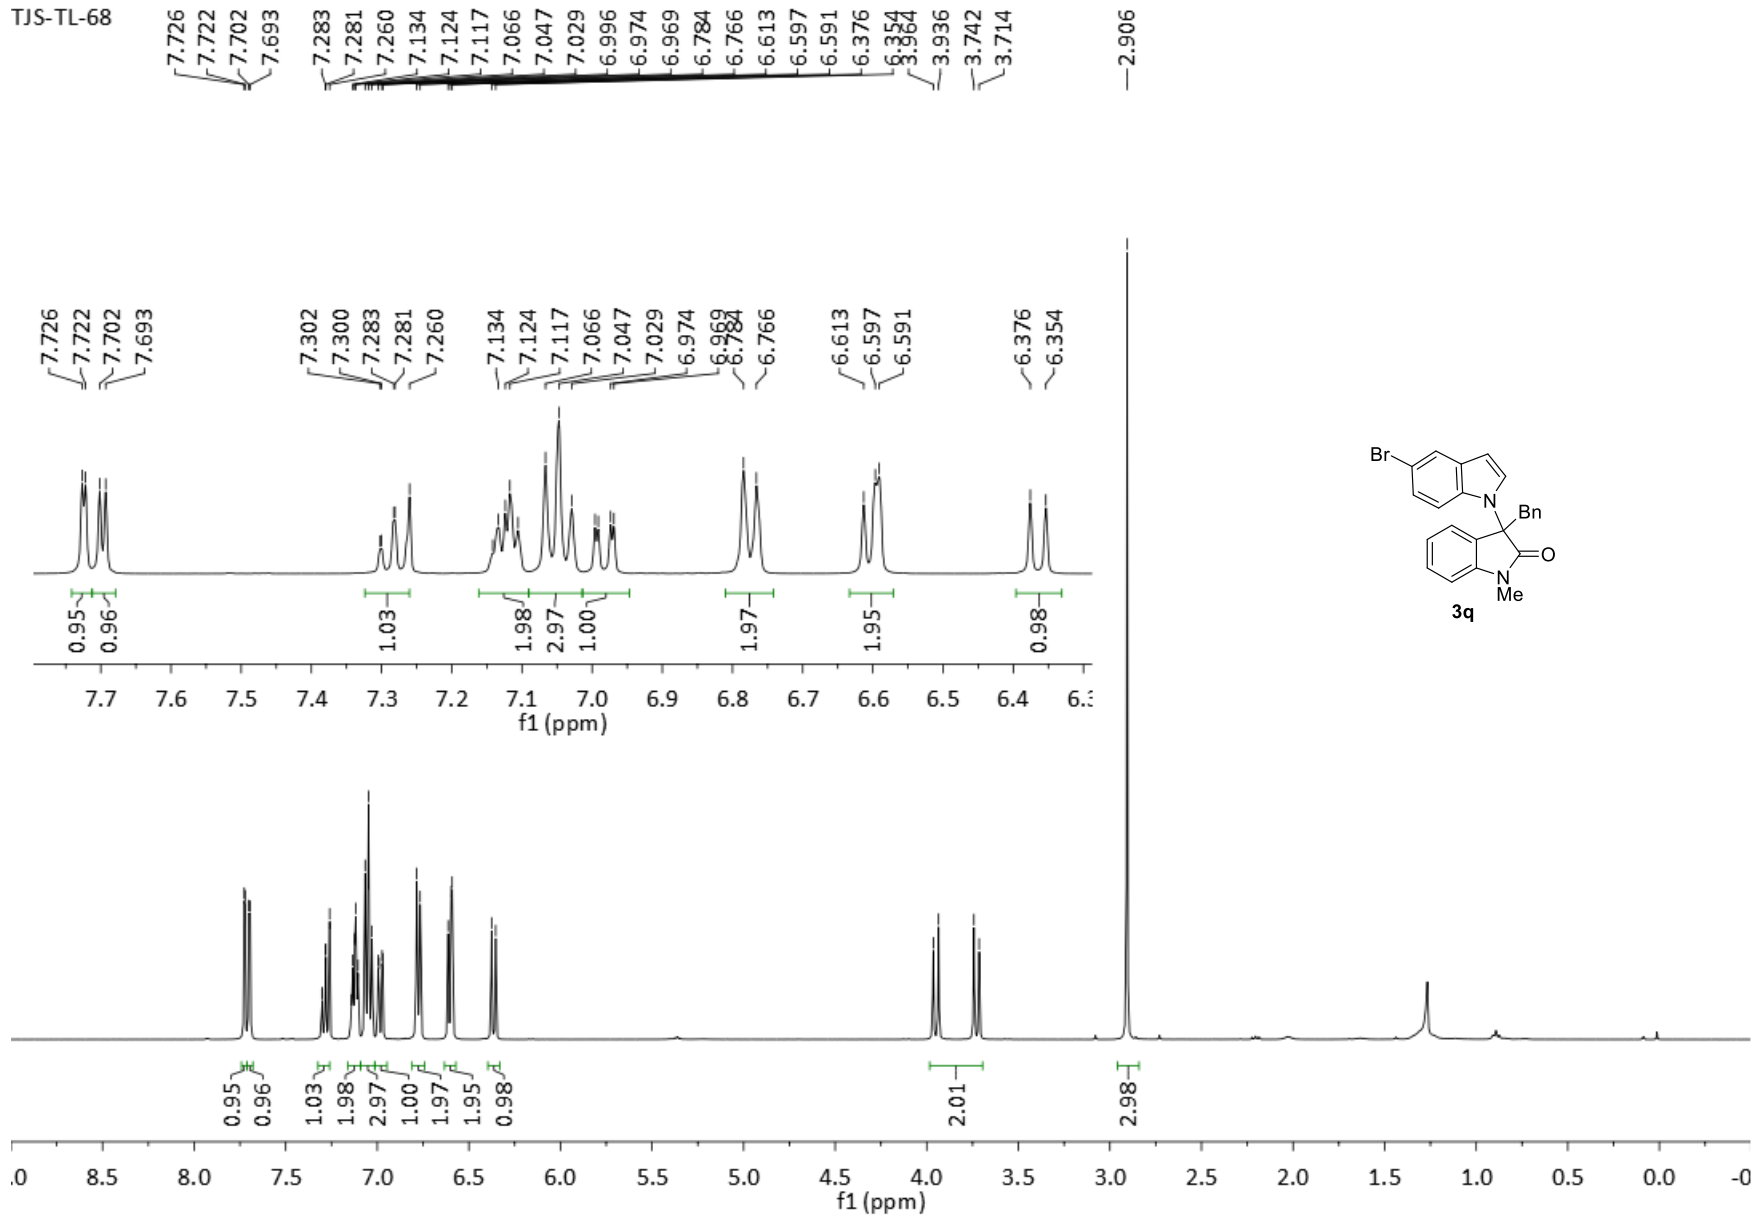

TJS-TL-68

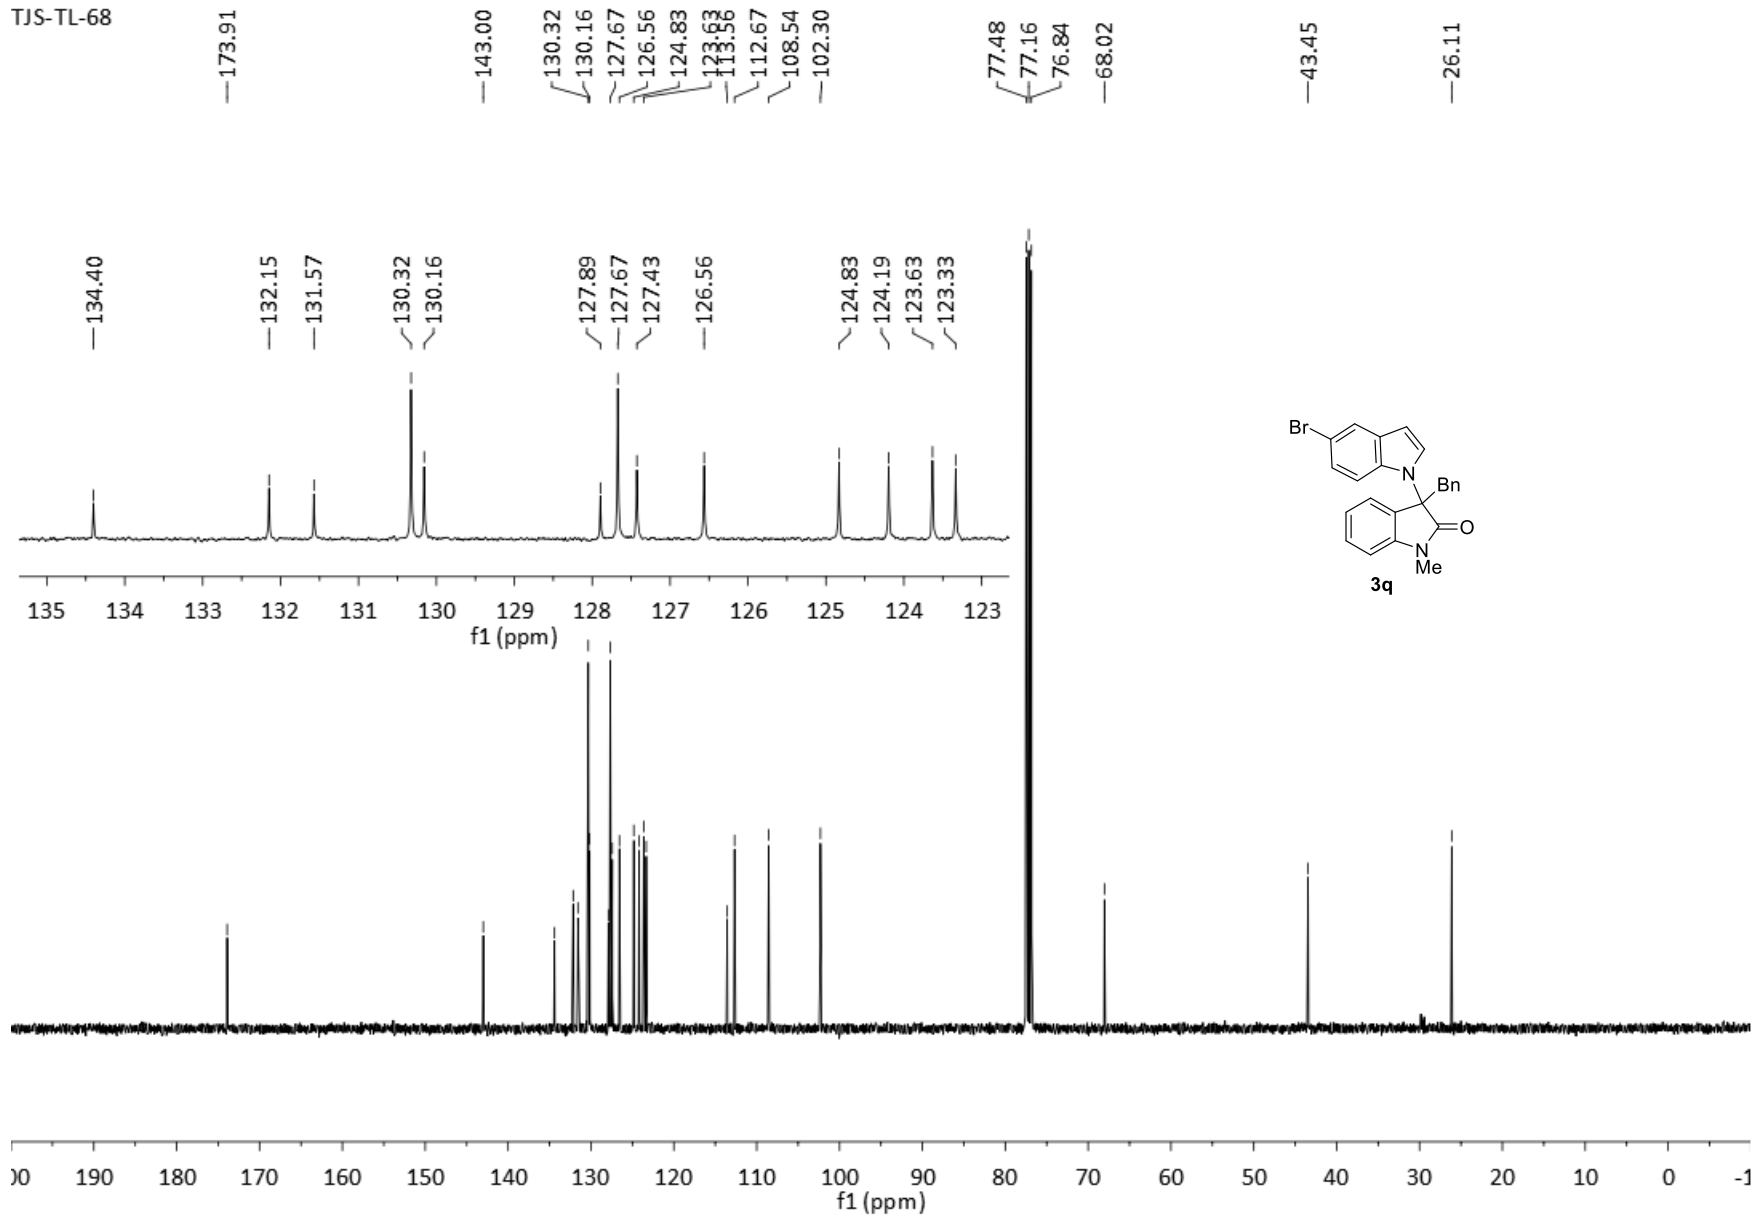

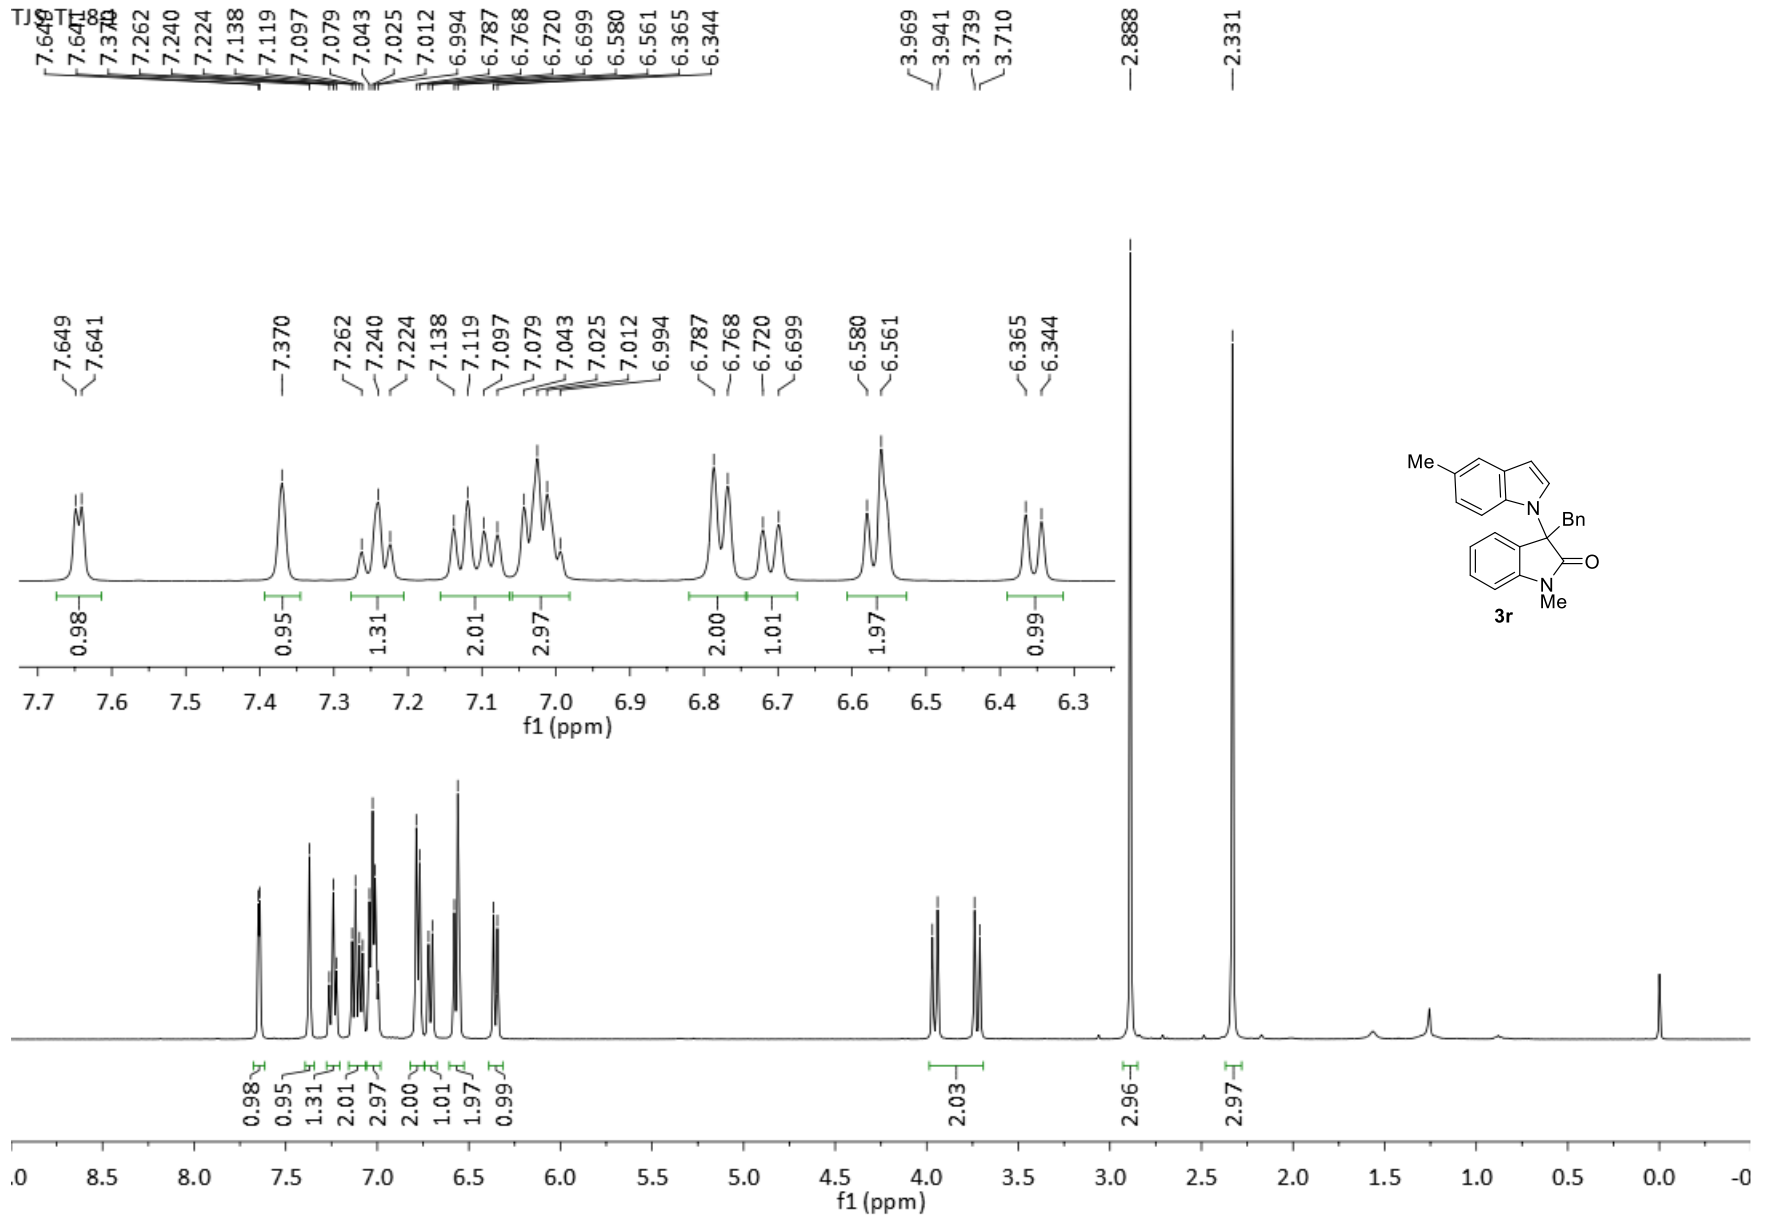

TJS-TL-8-1

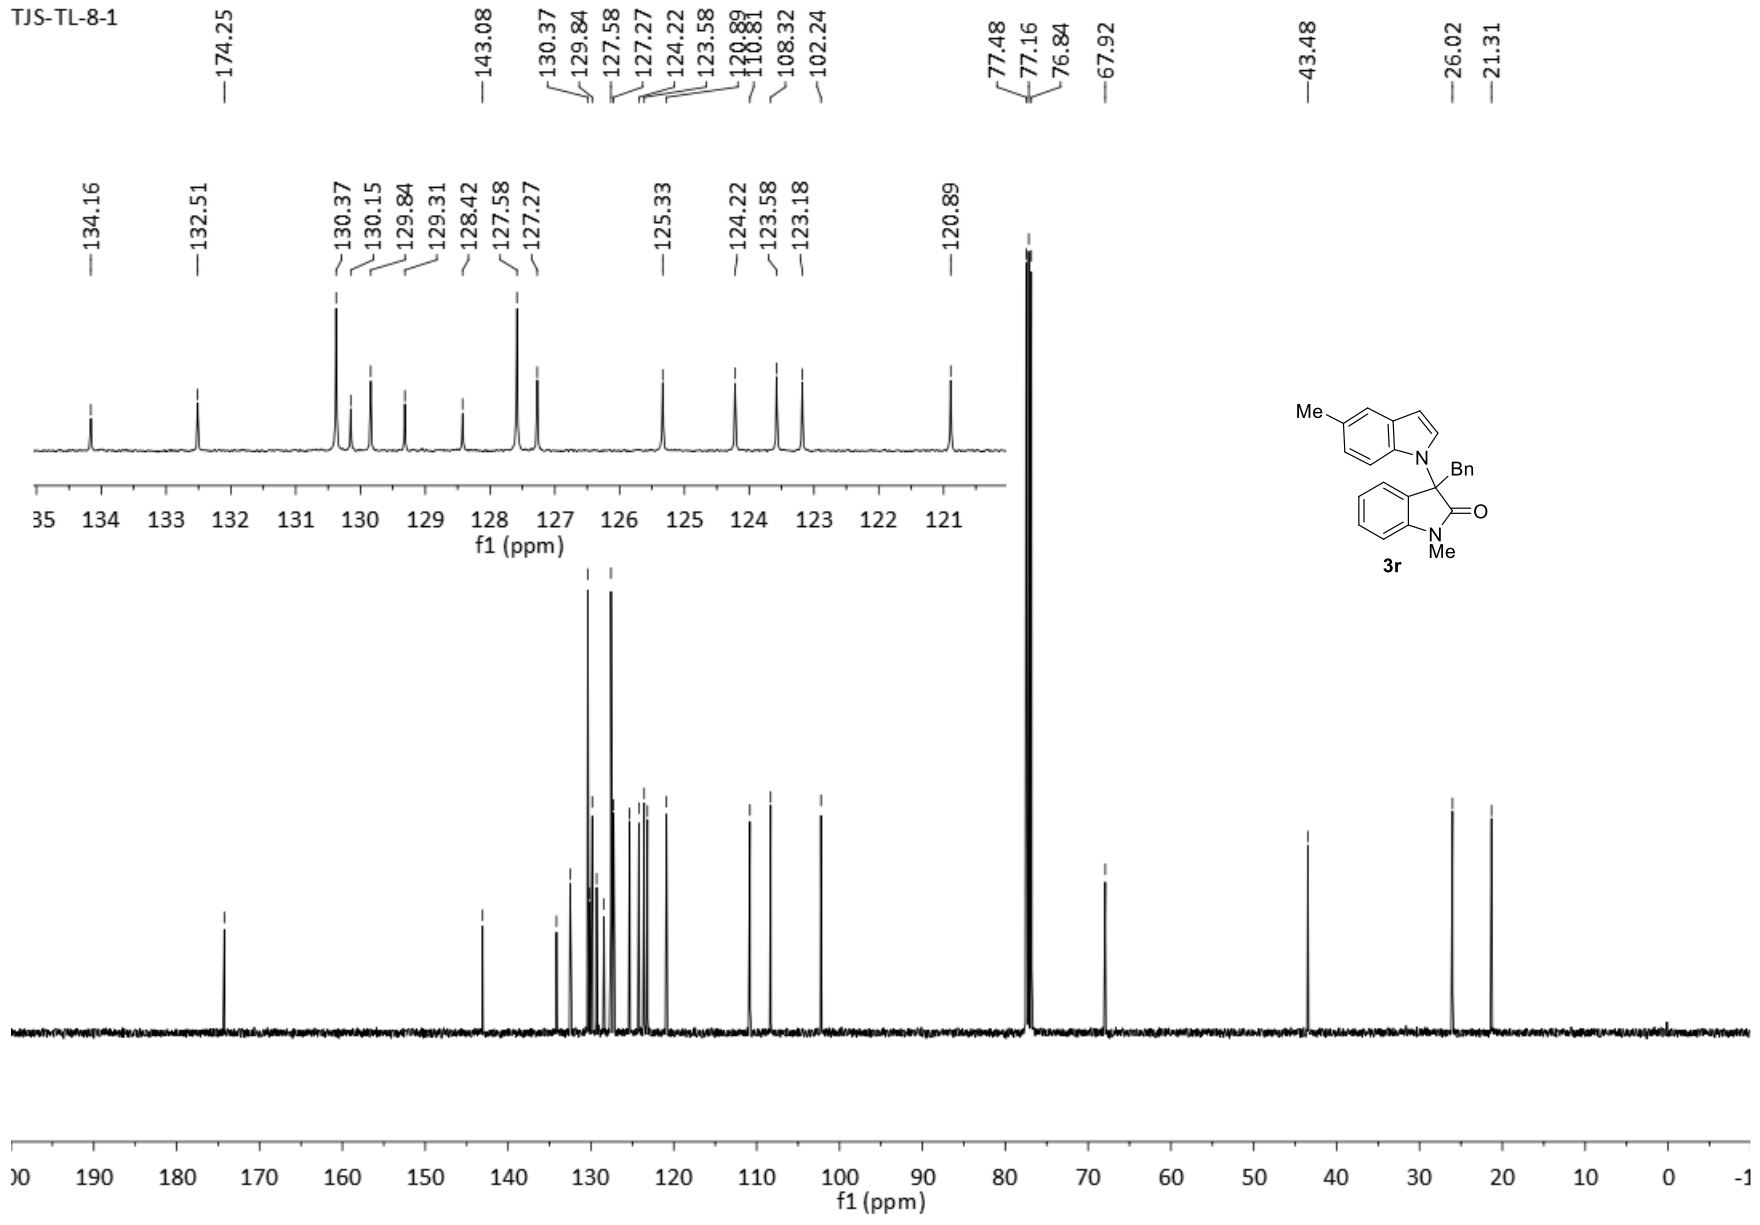

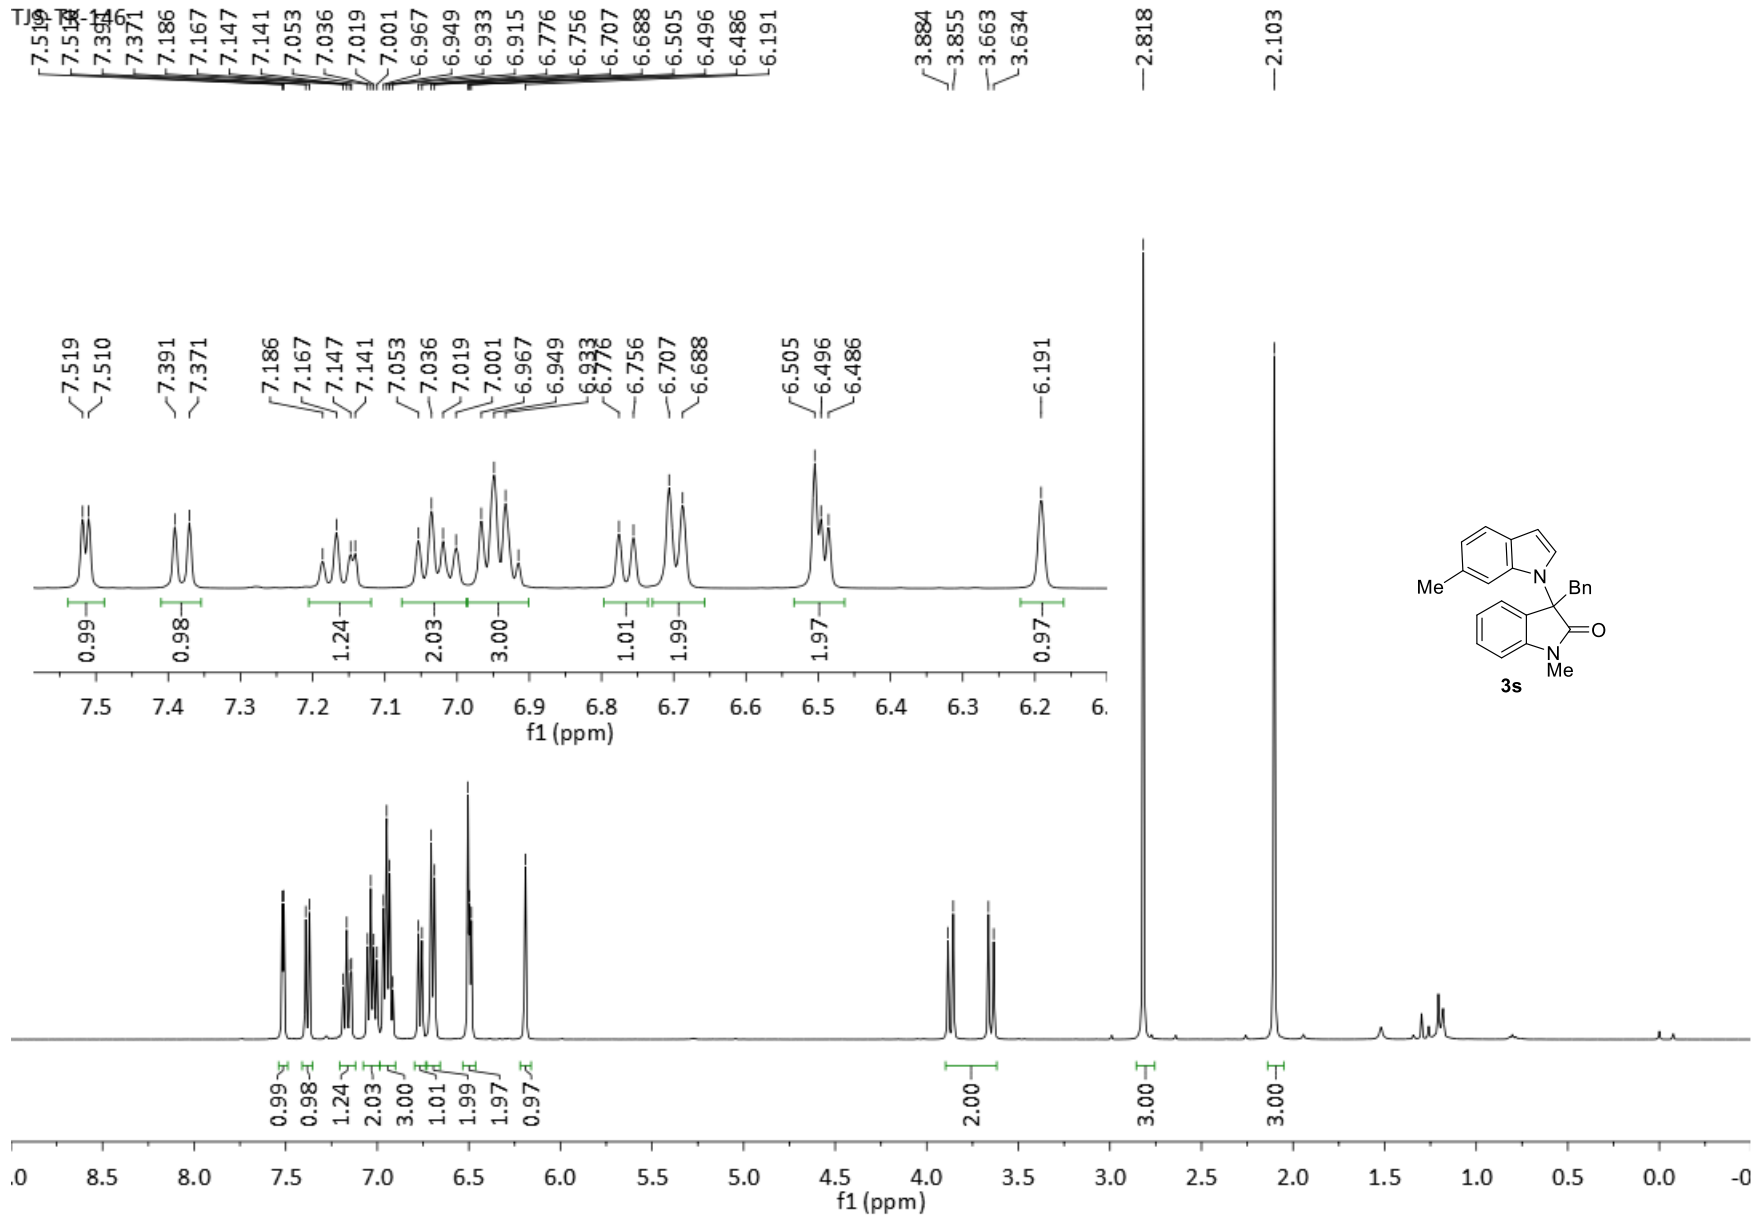



TJS-TK-146

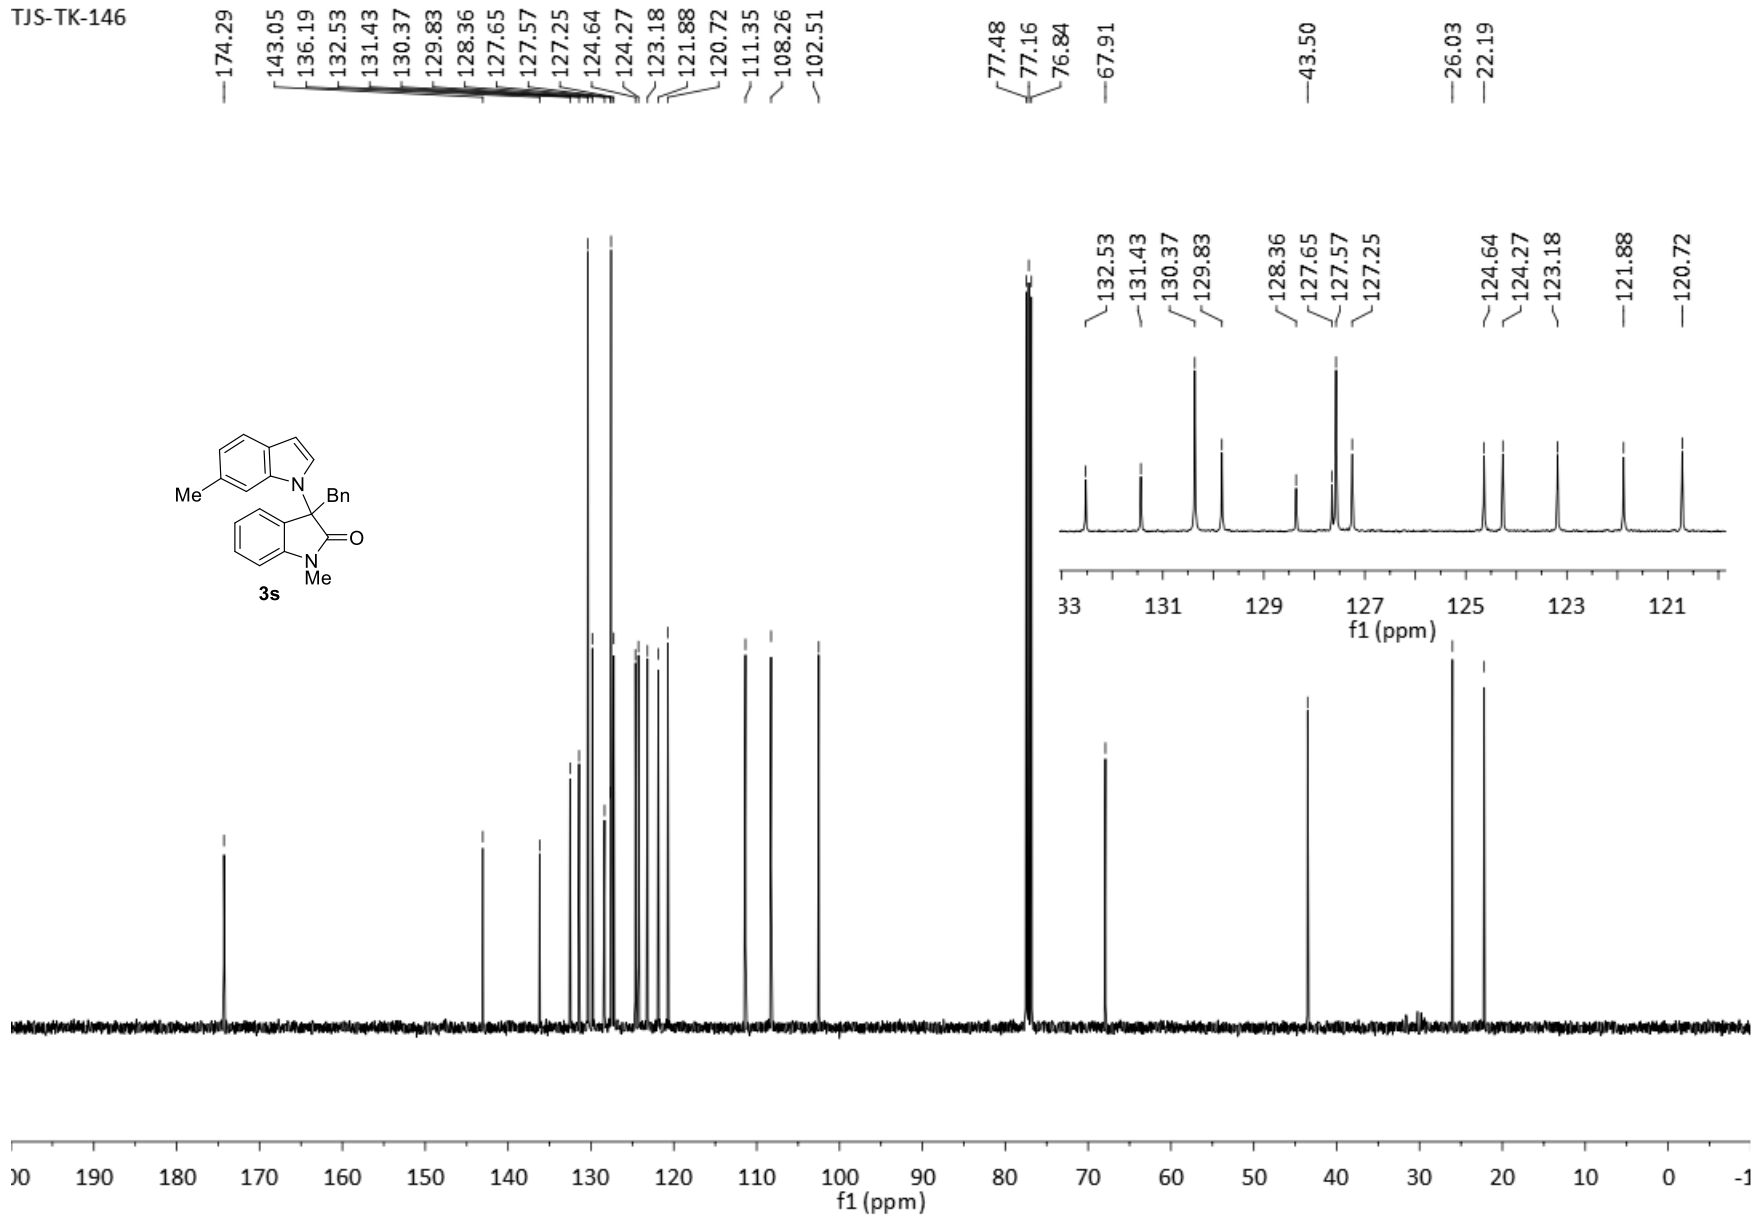

TJS-TL-10

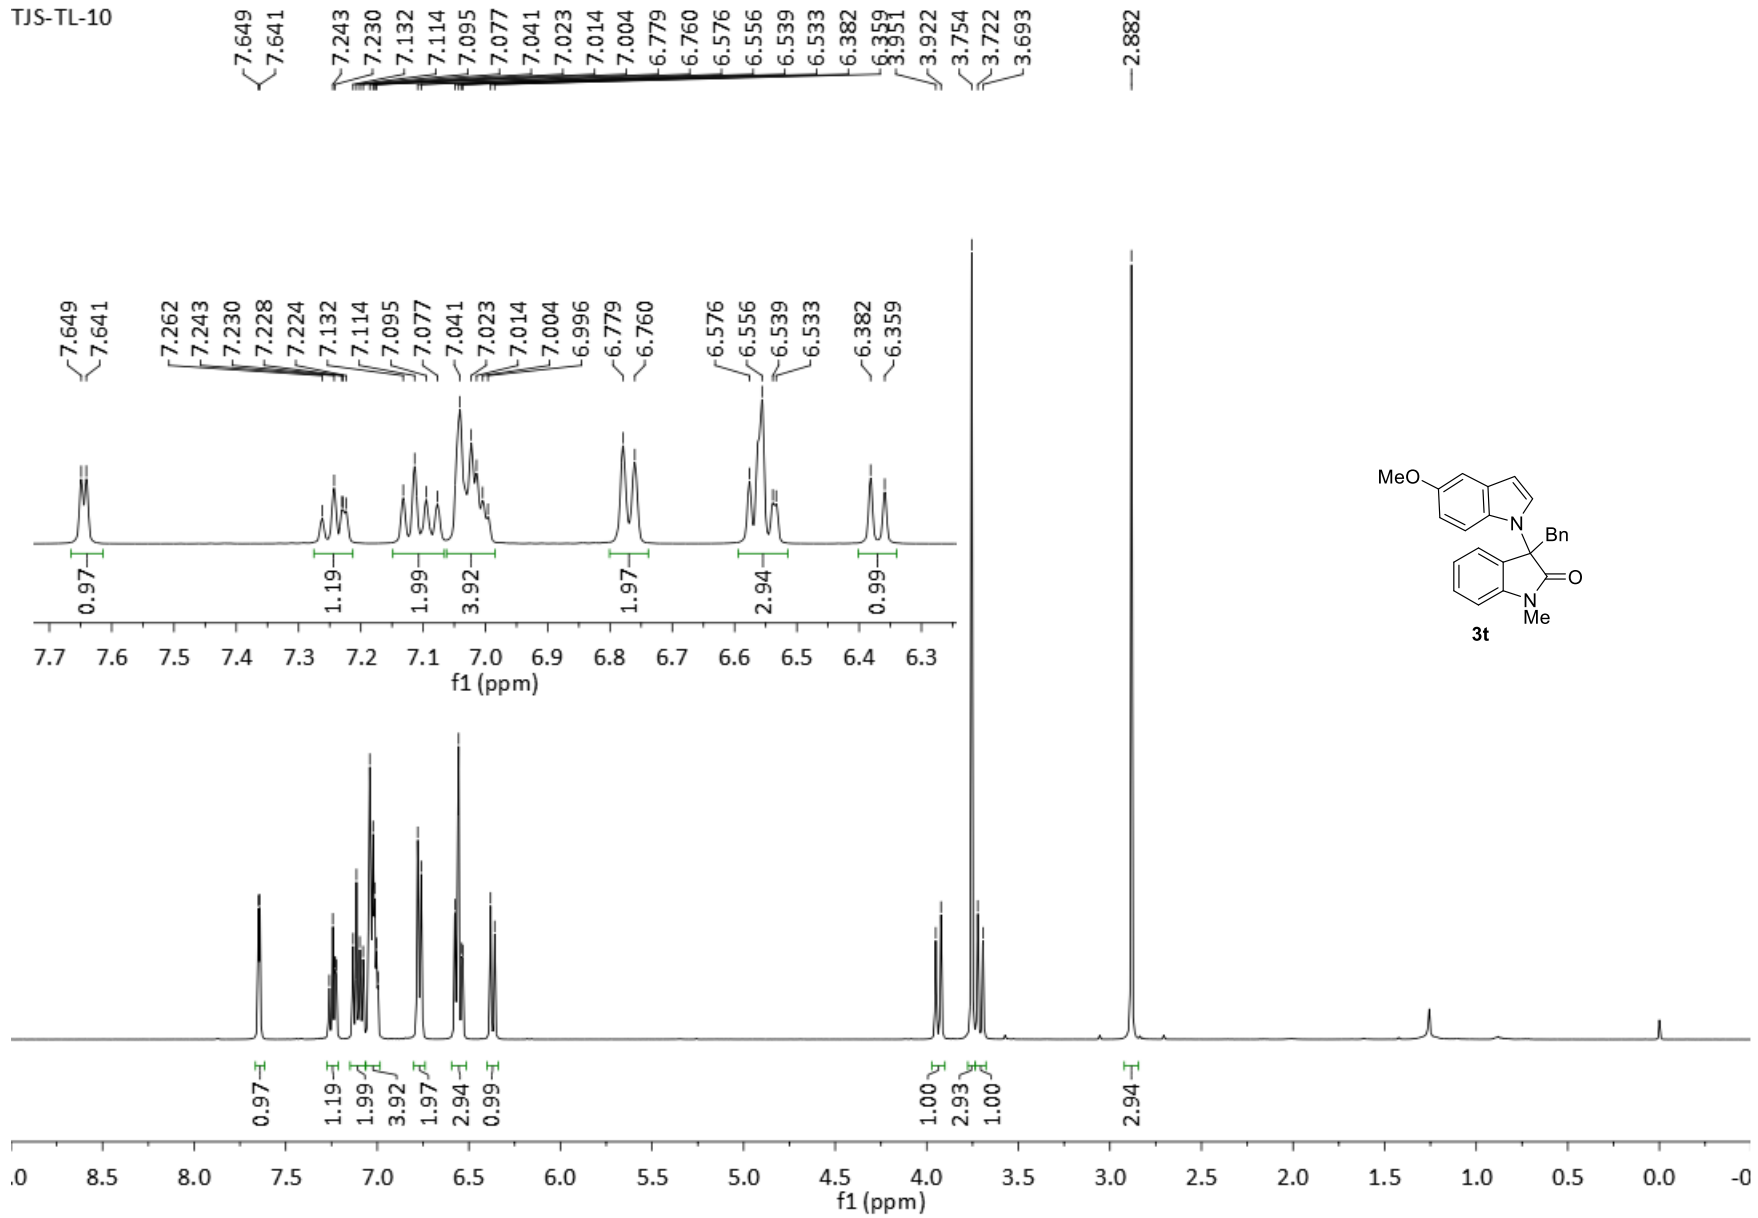

TJS-TL-10

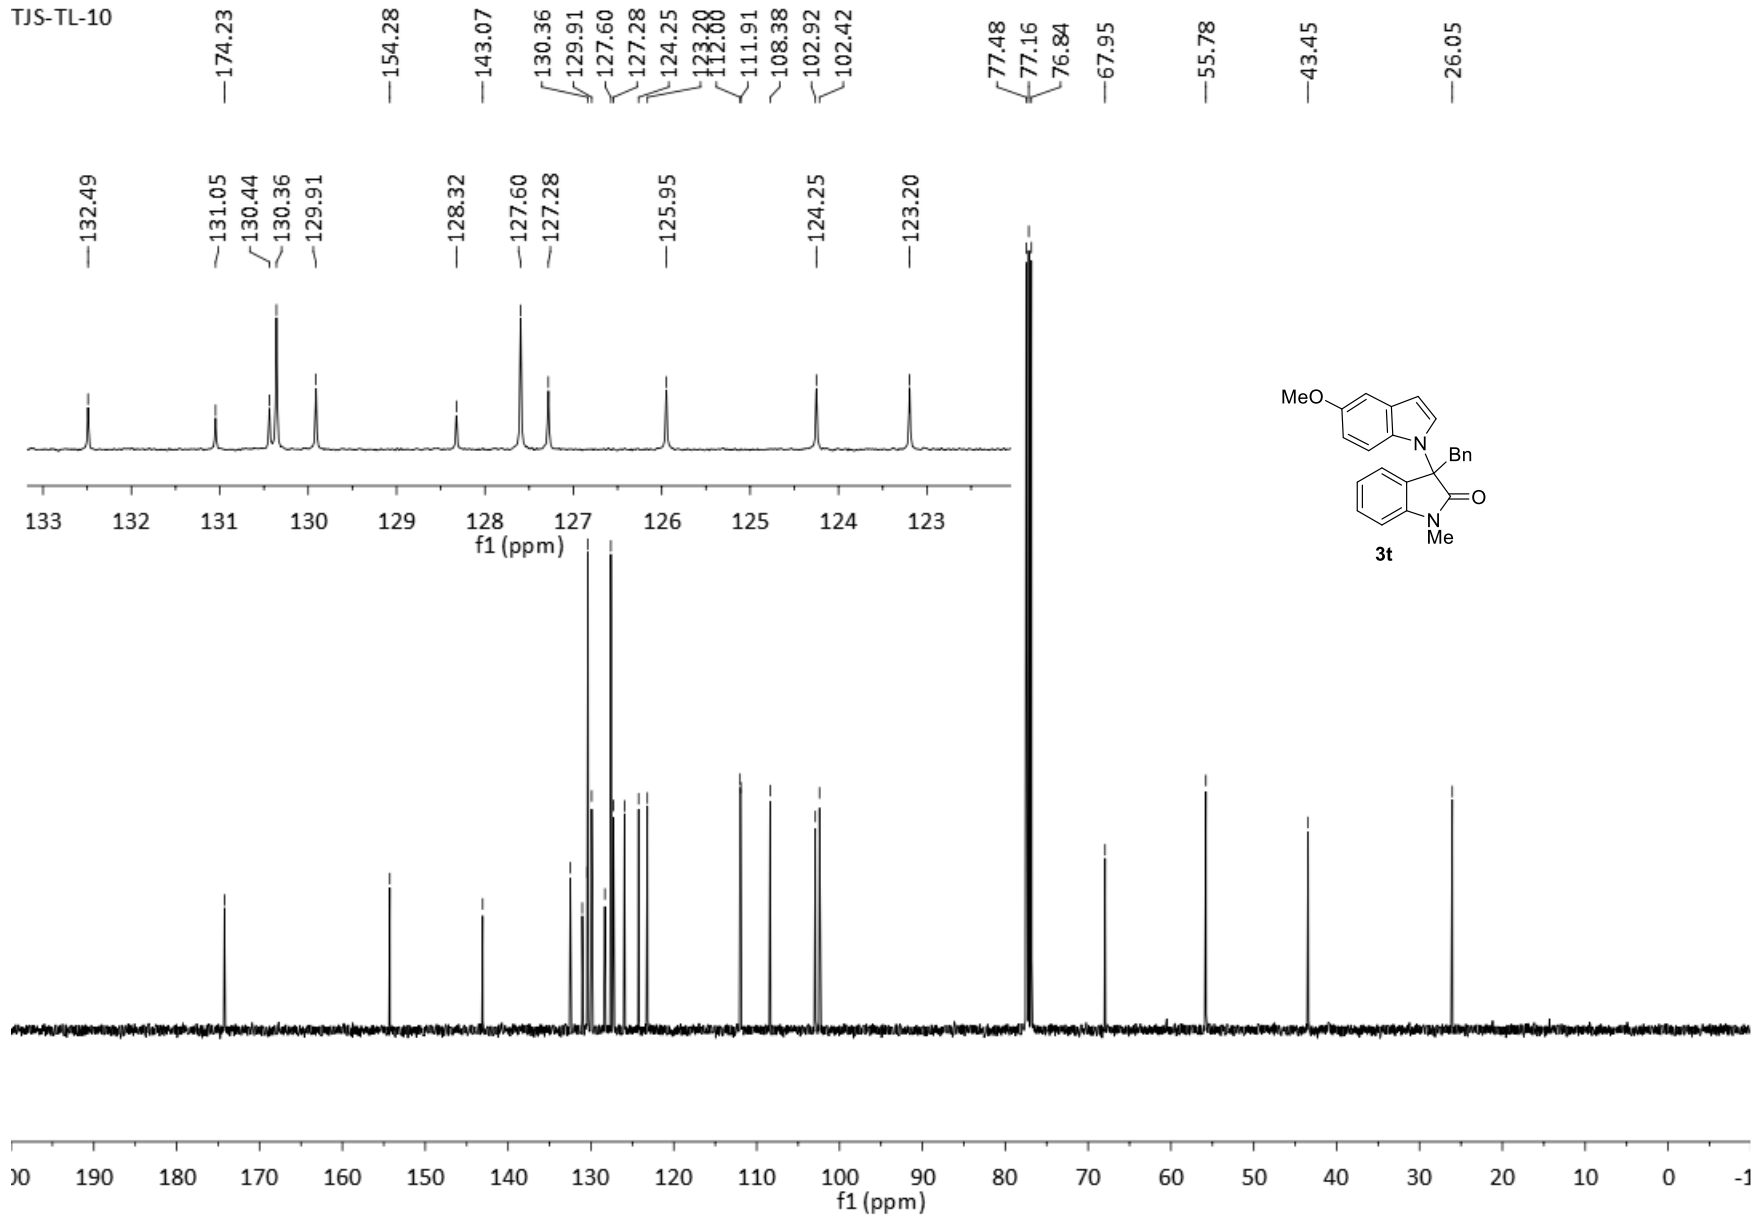

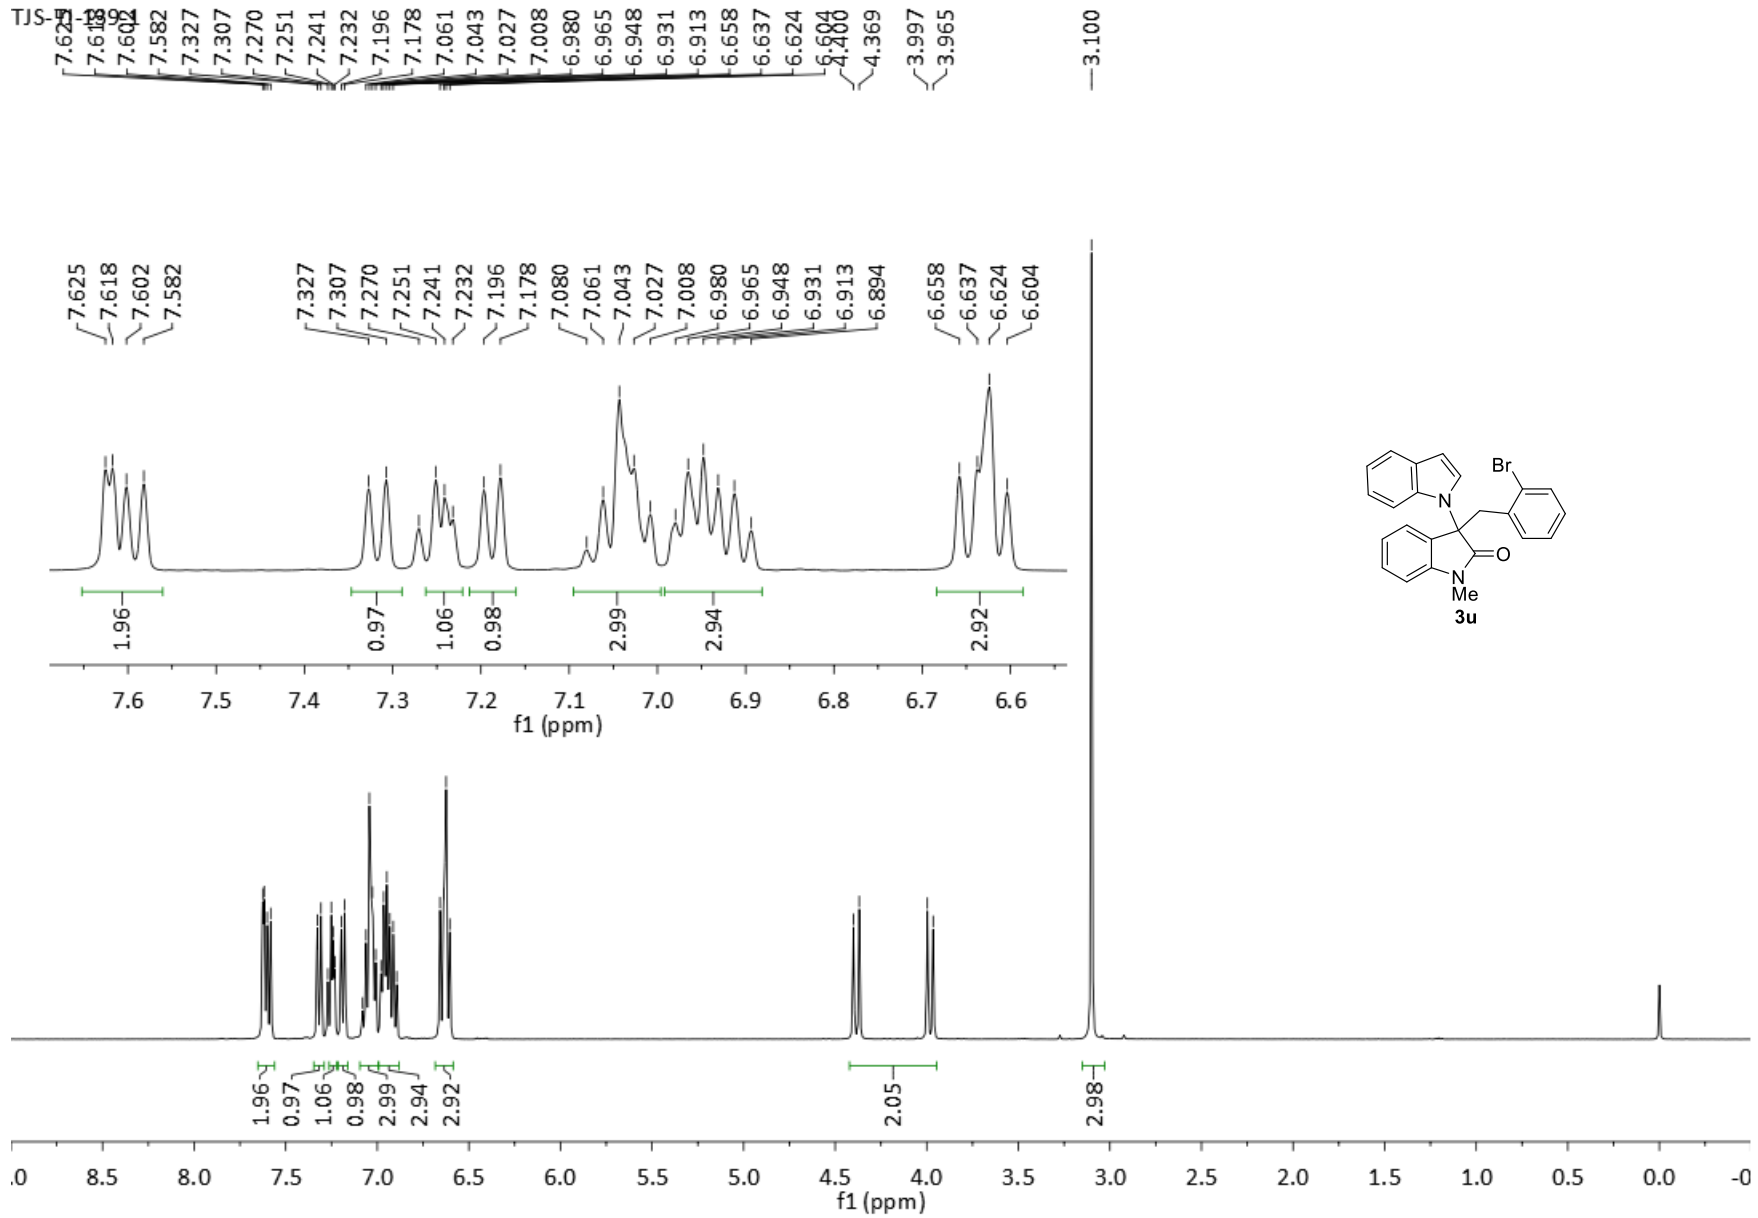

TJS-TJ-139-1

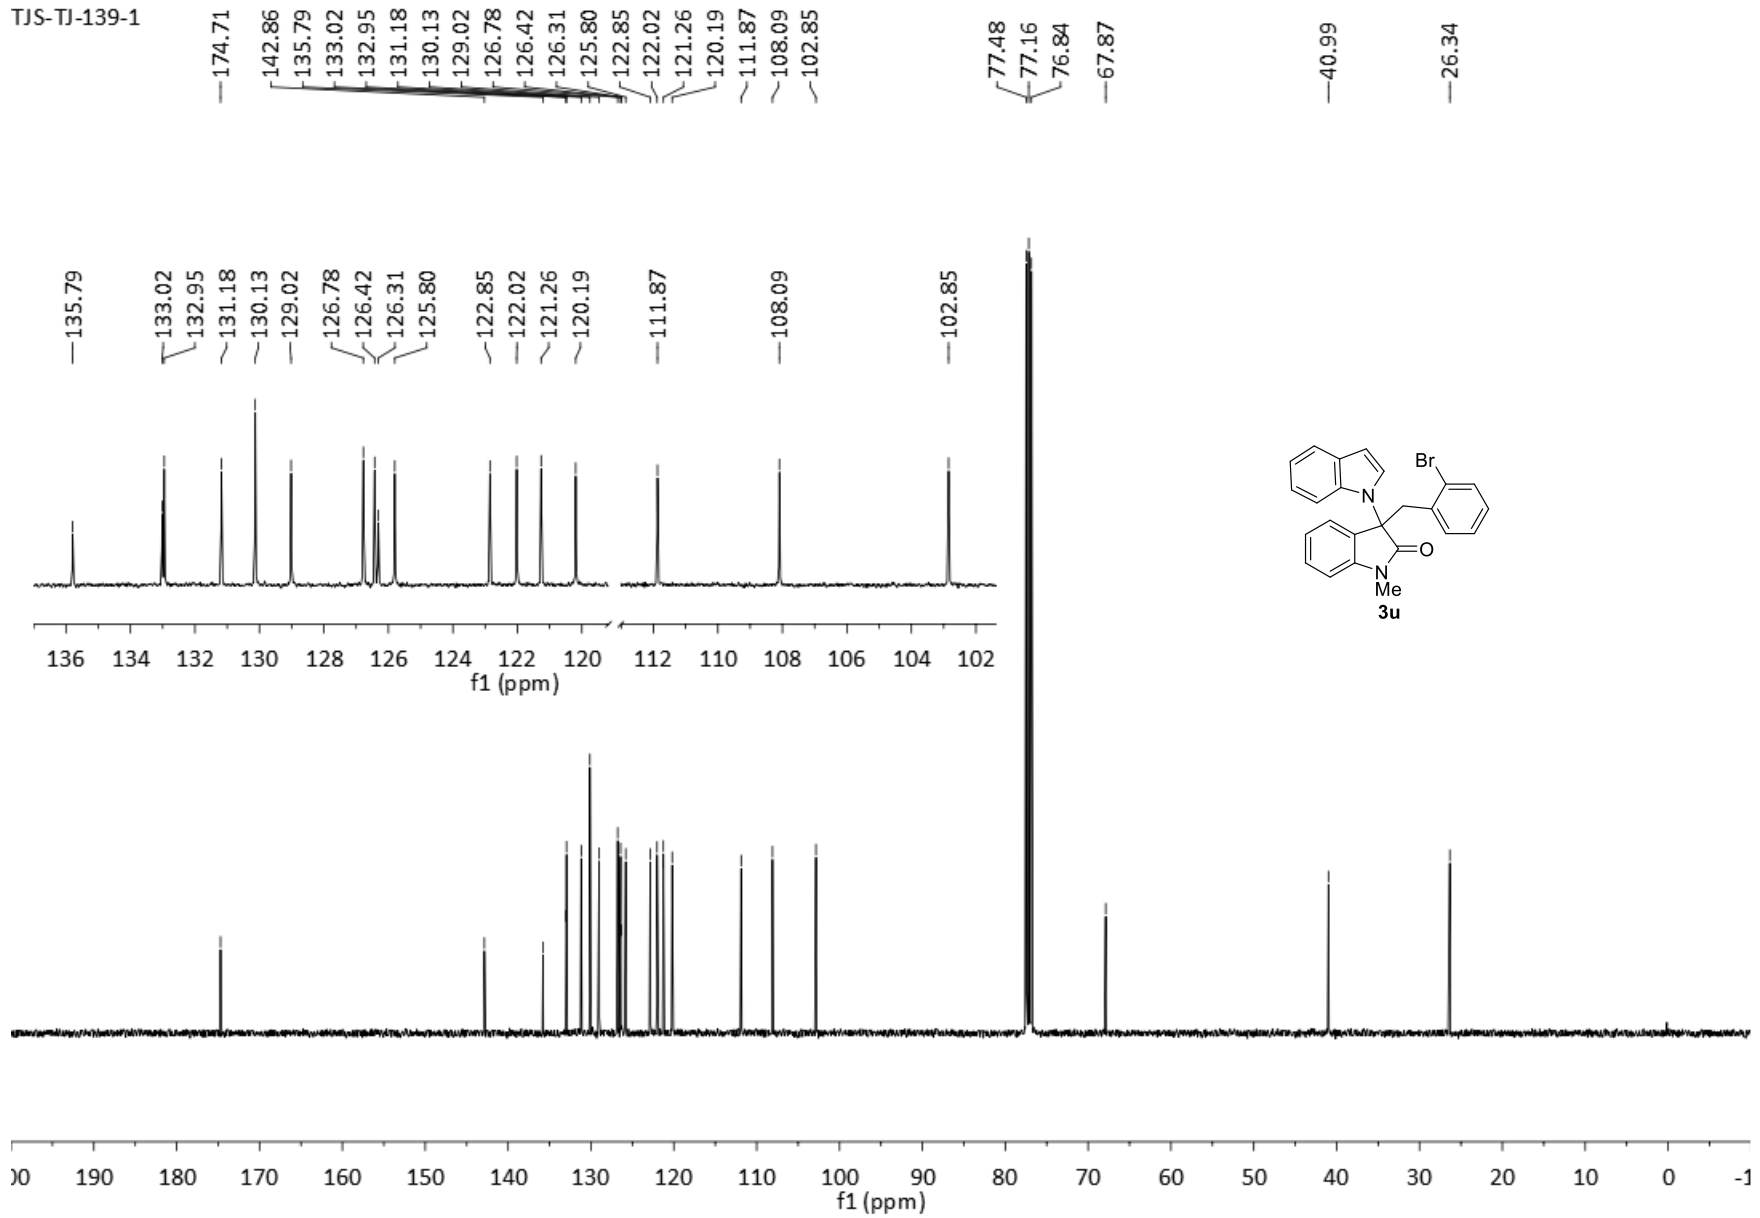

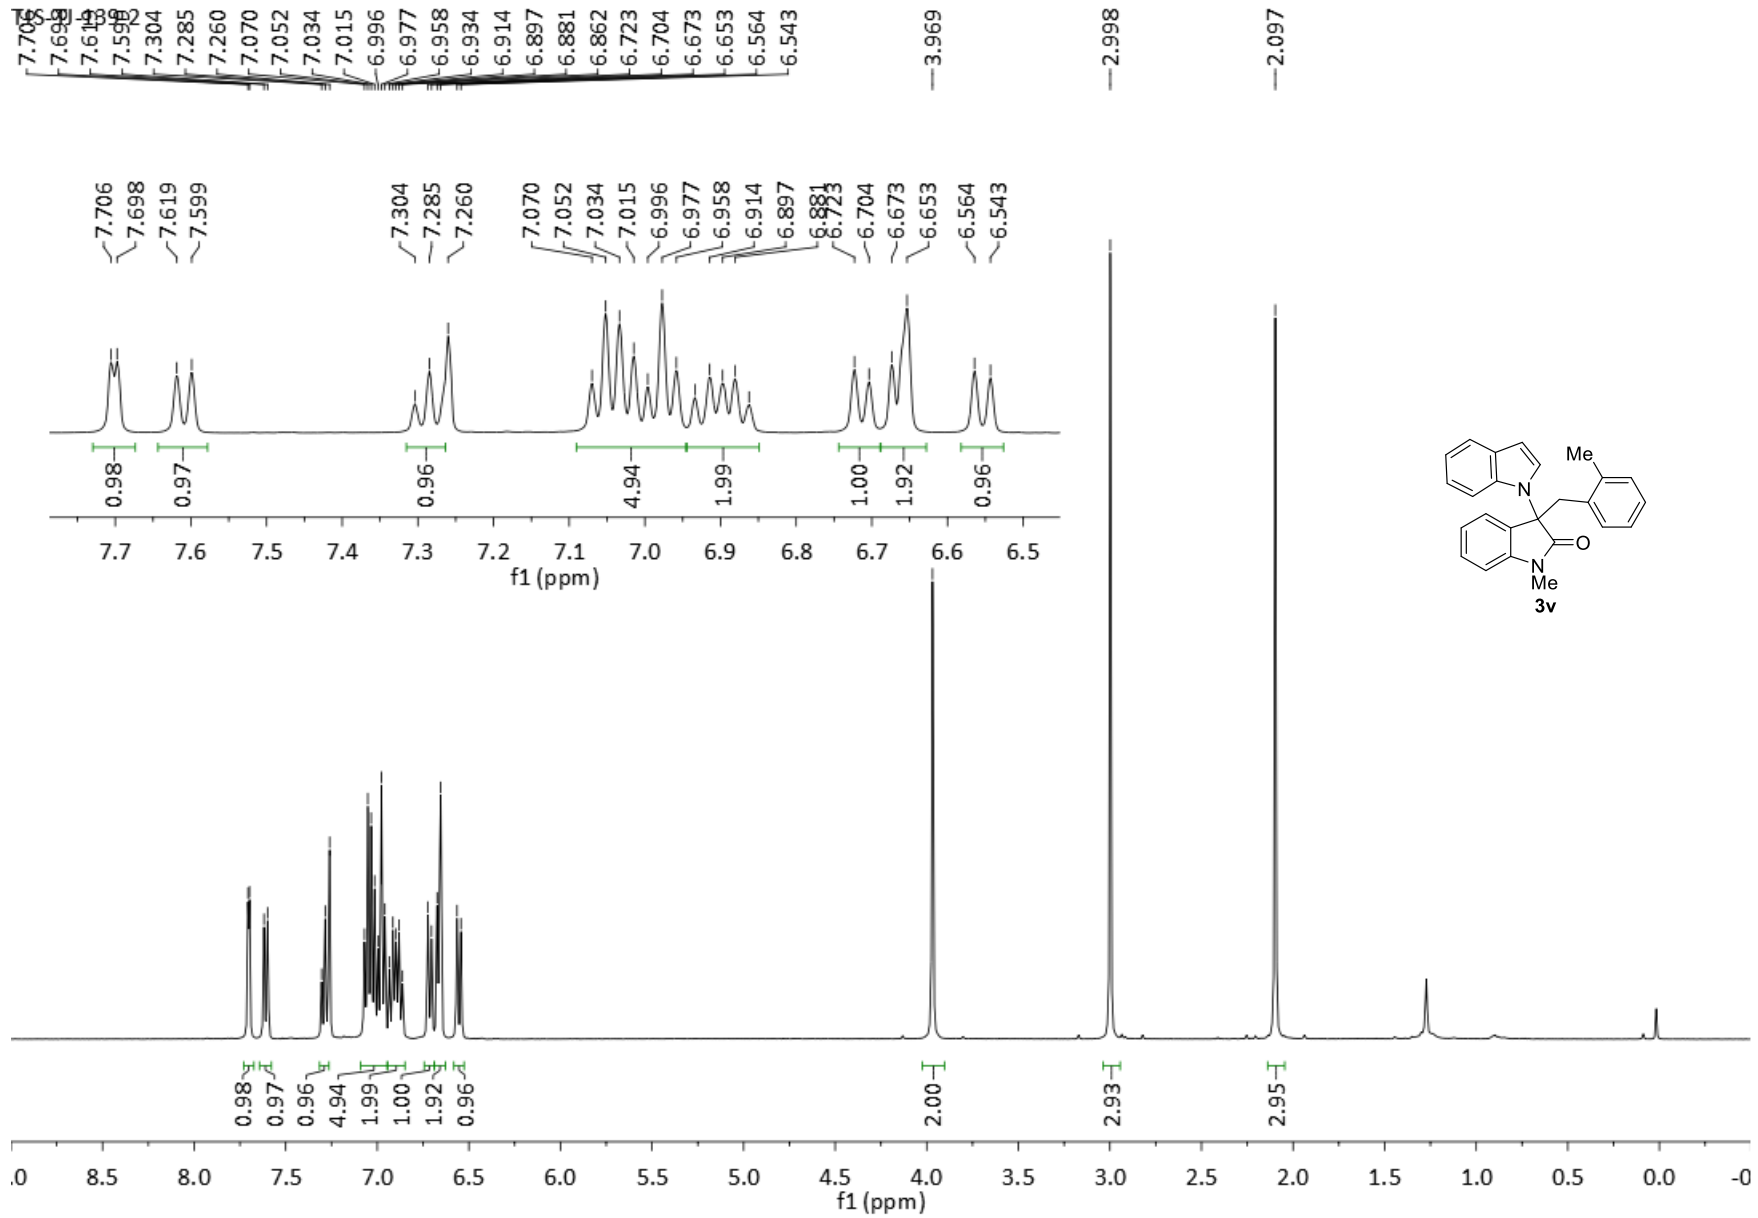

TJS-TJ-139-2

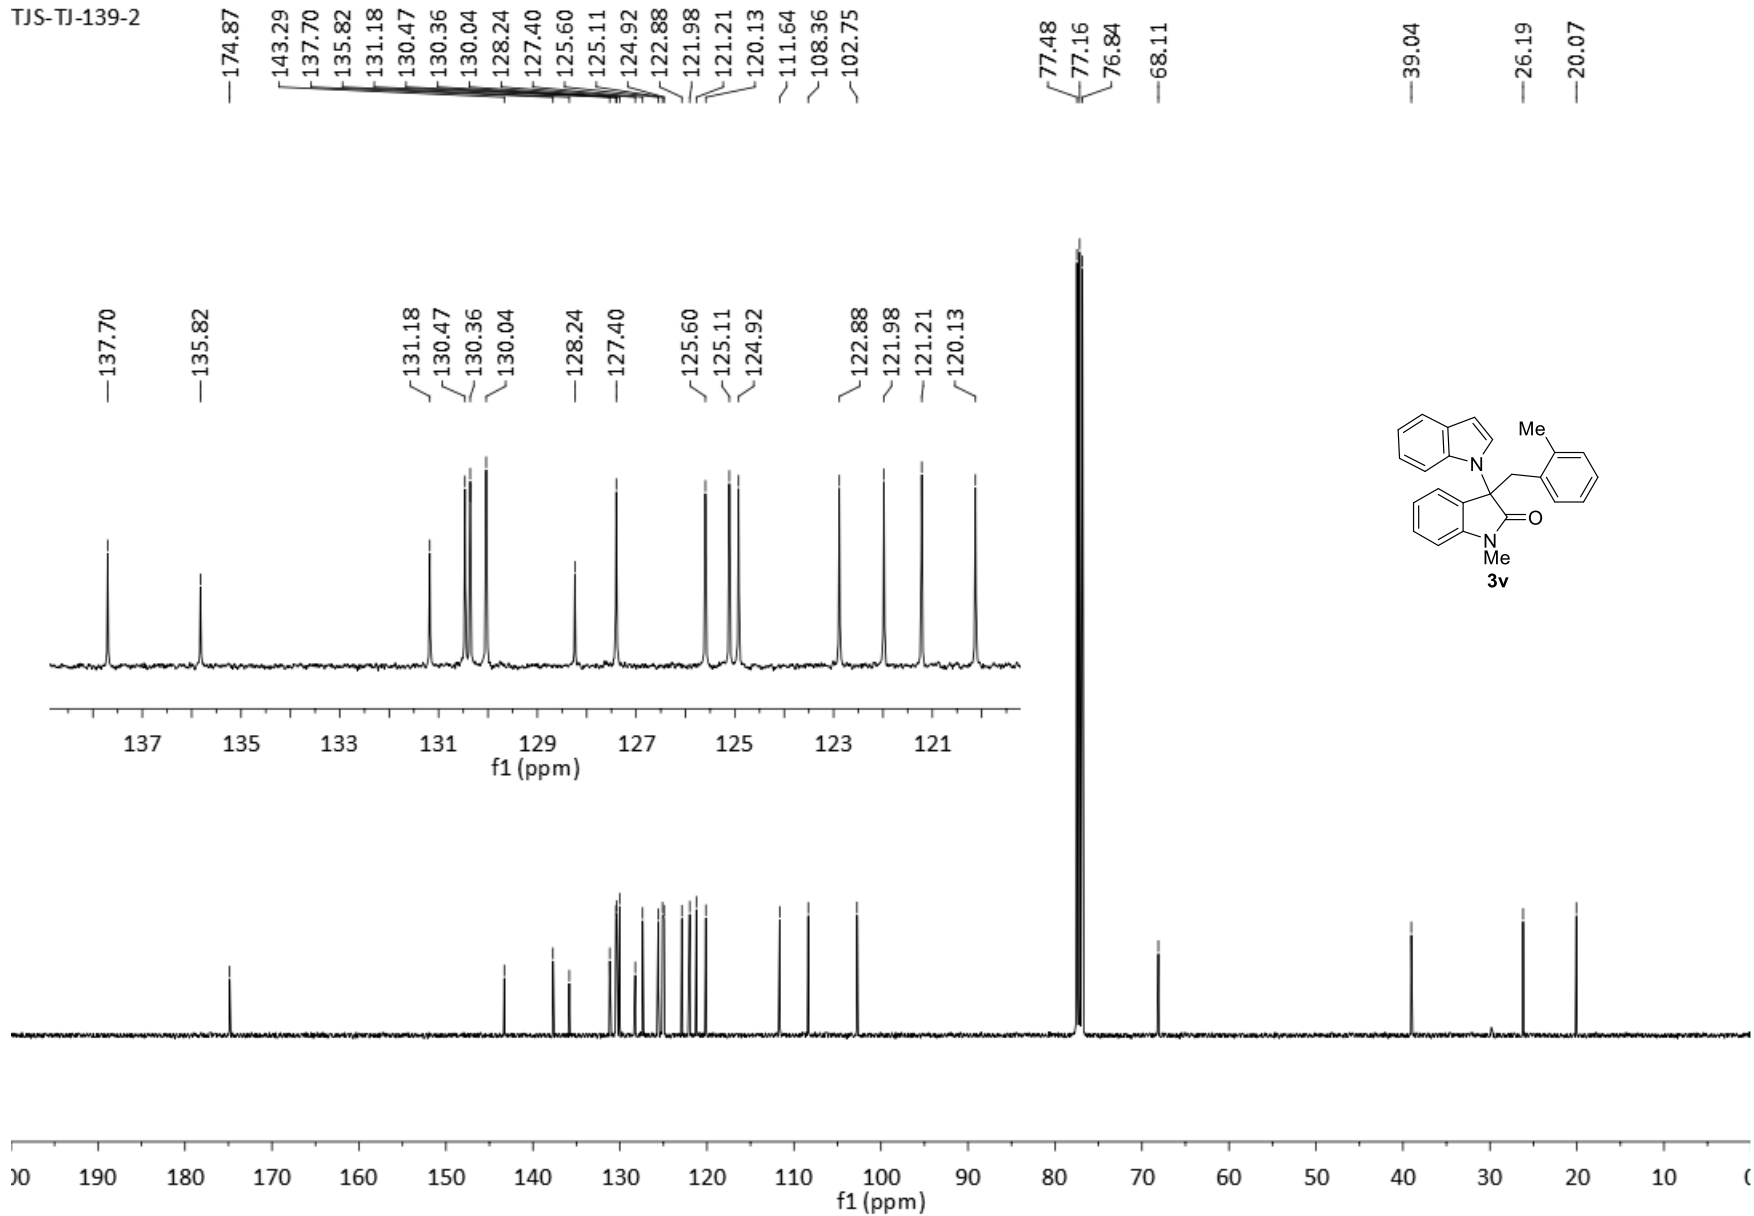

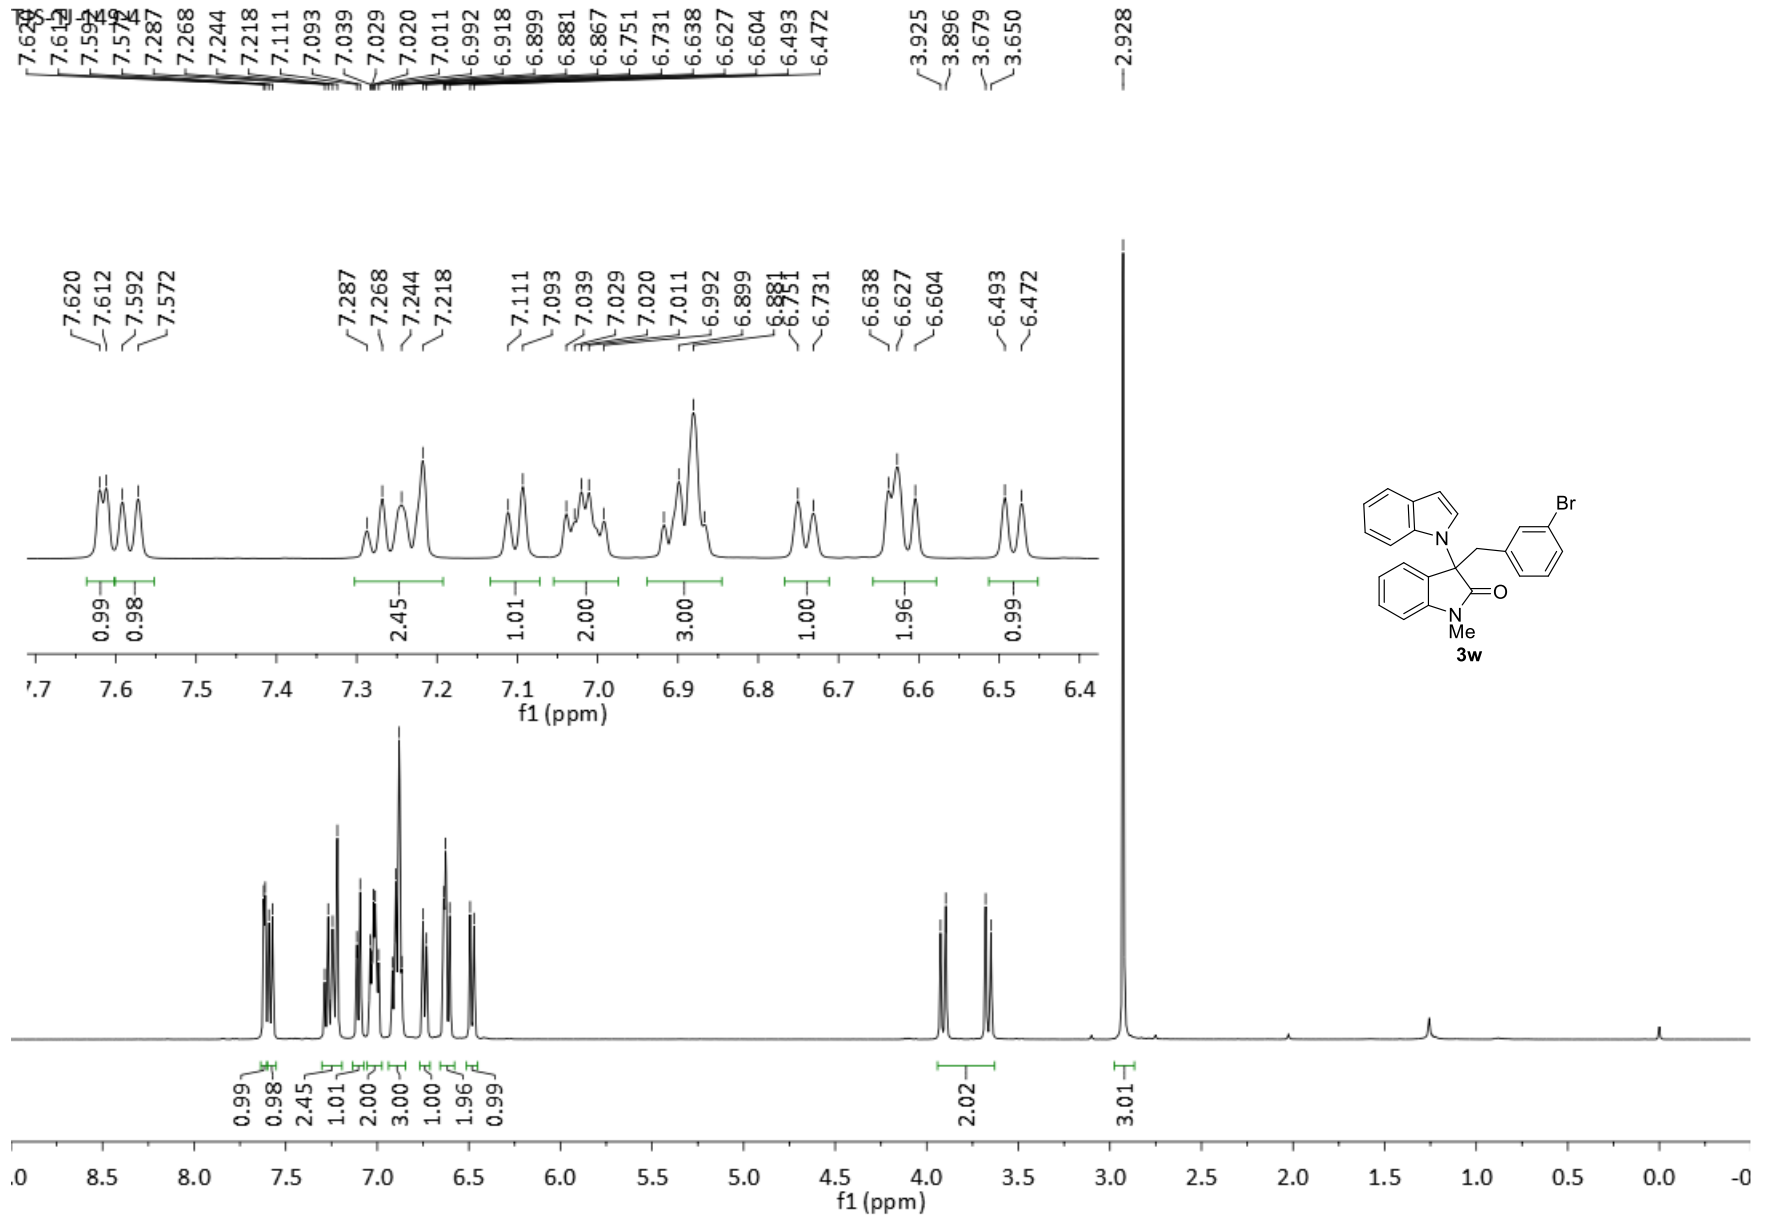



TJS-TJ-149-4

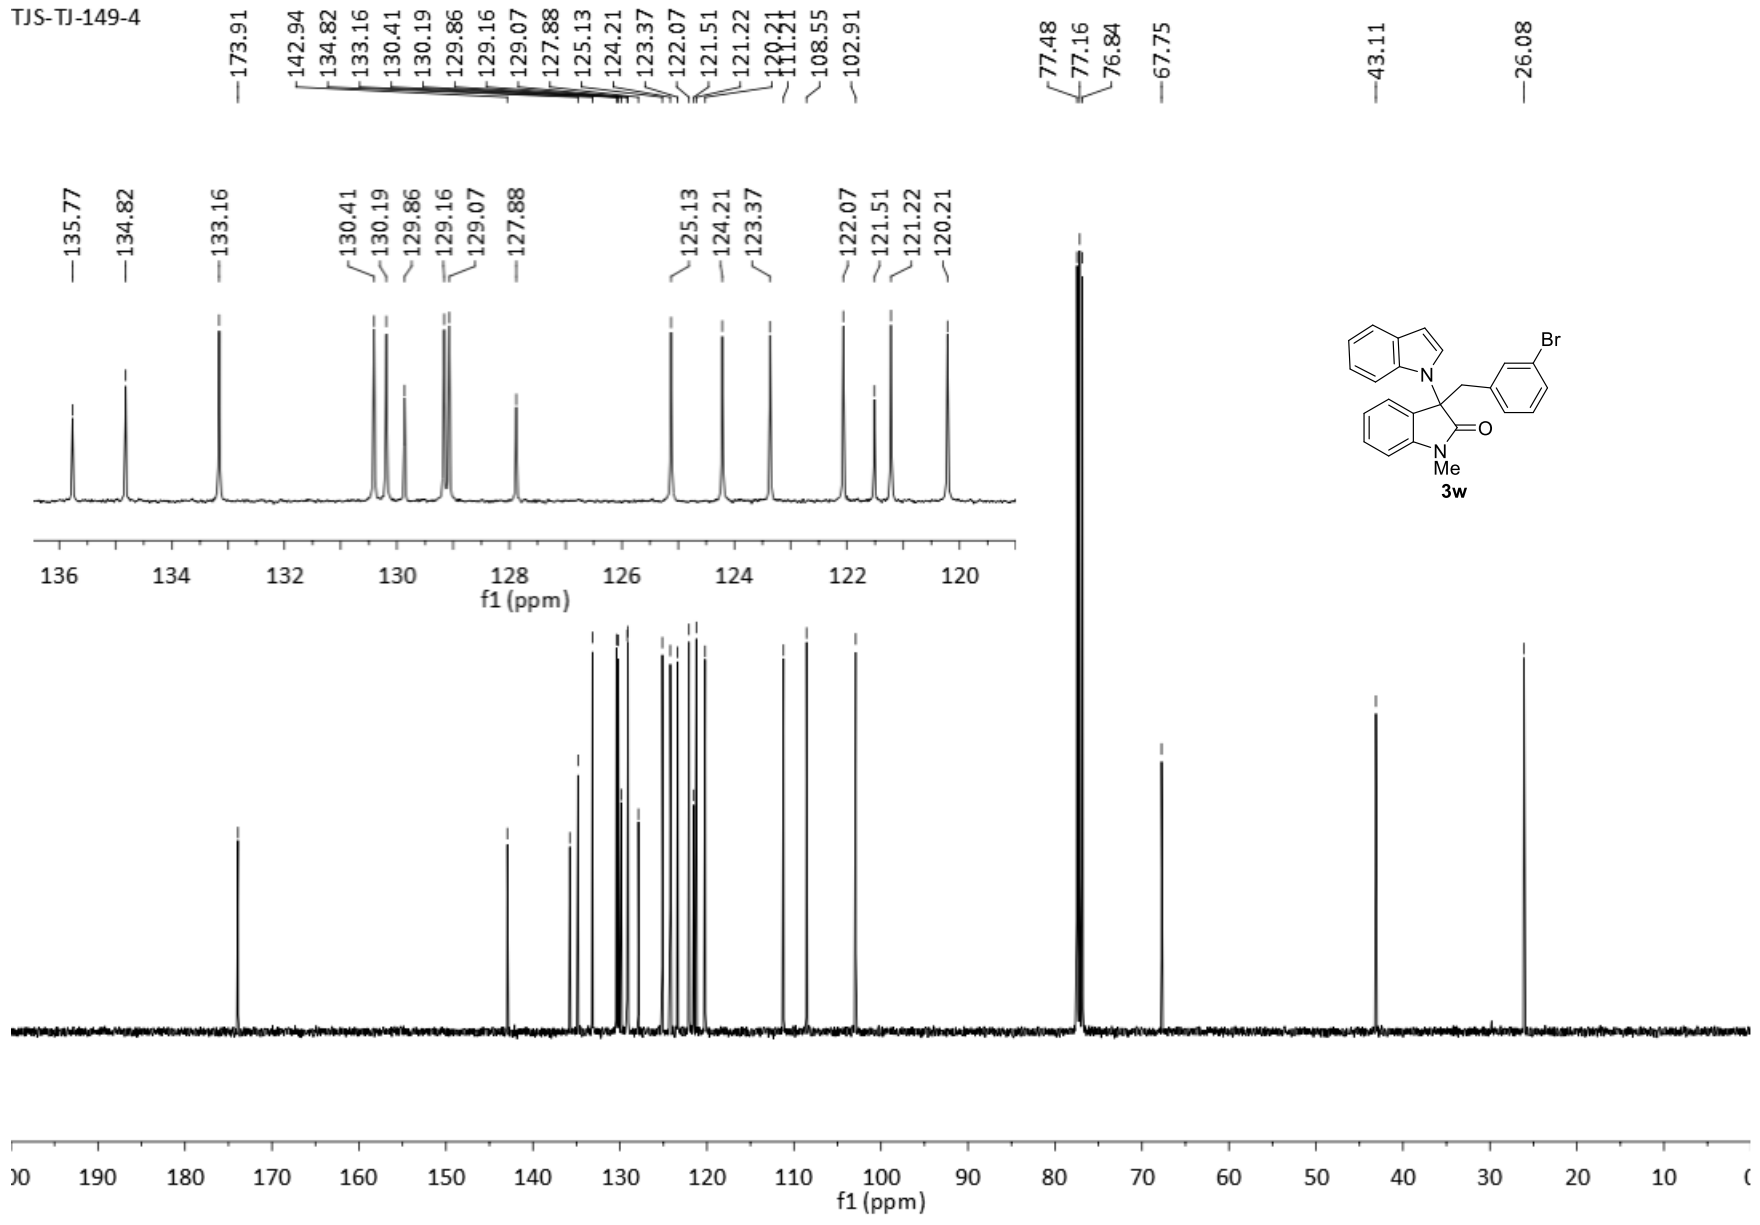

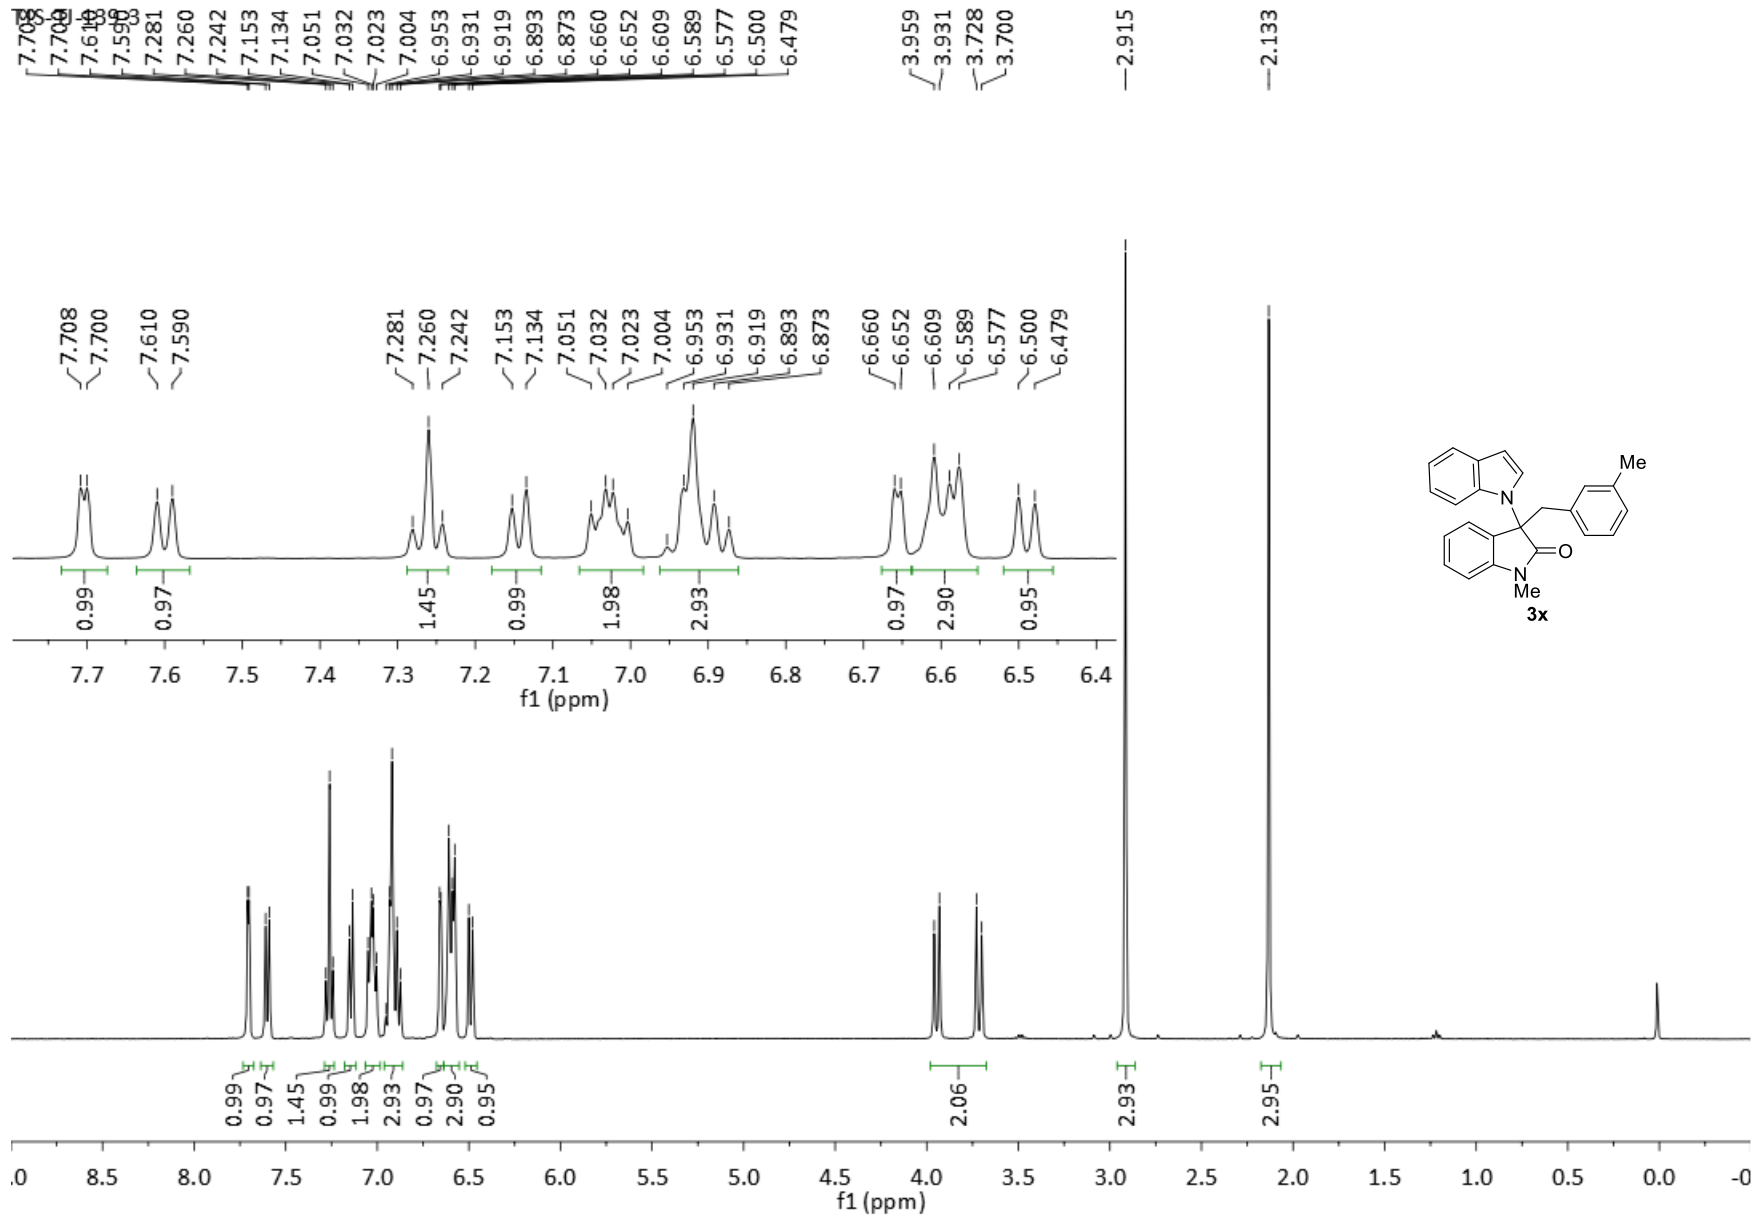

TJS-TJ-139-3

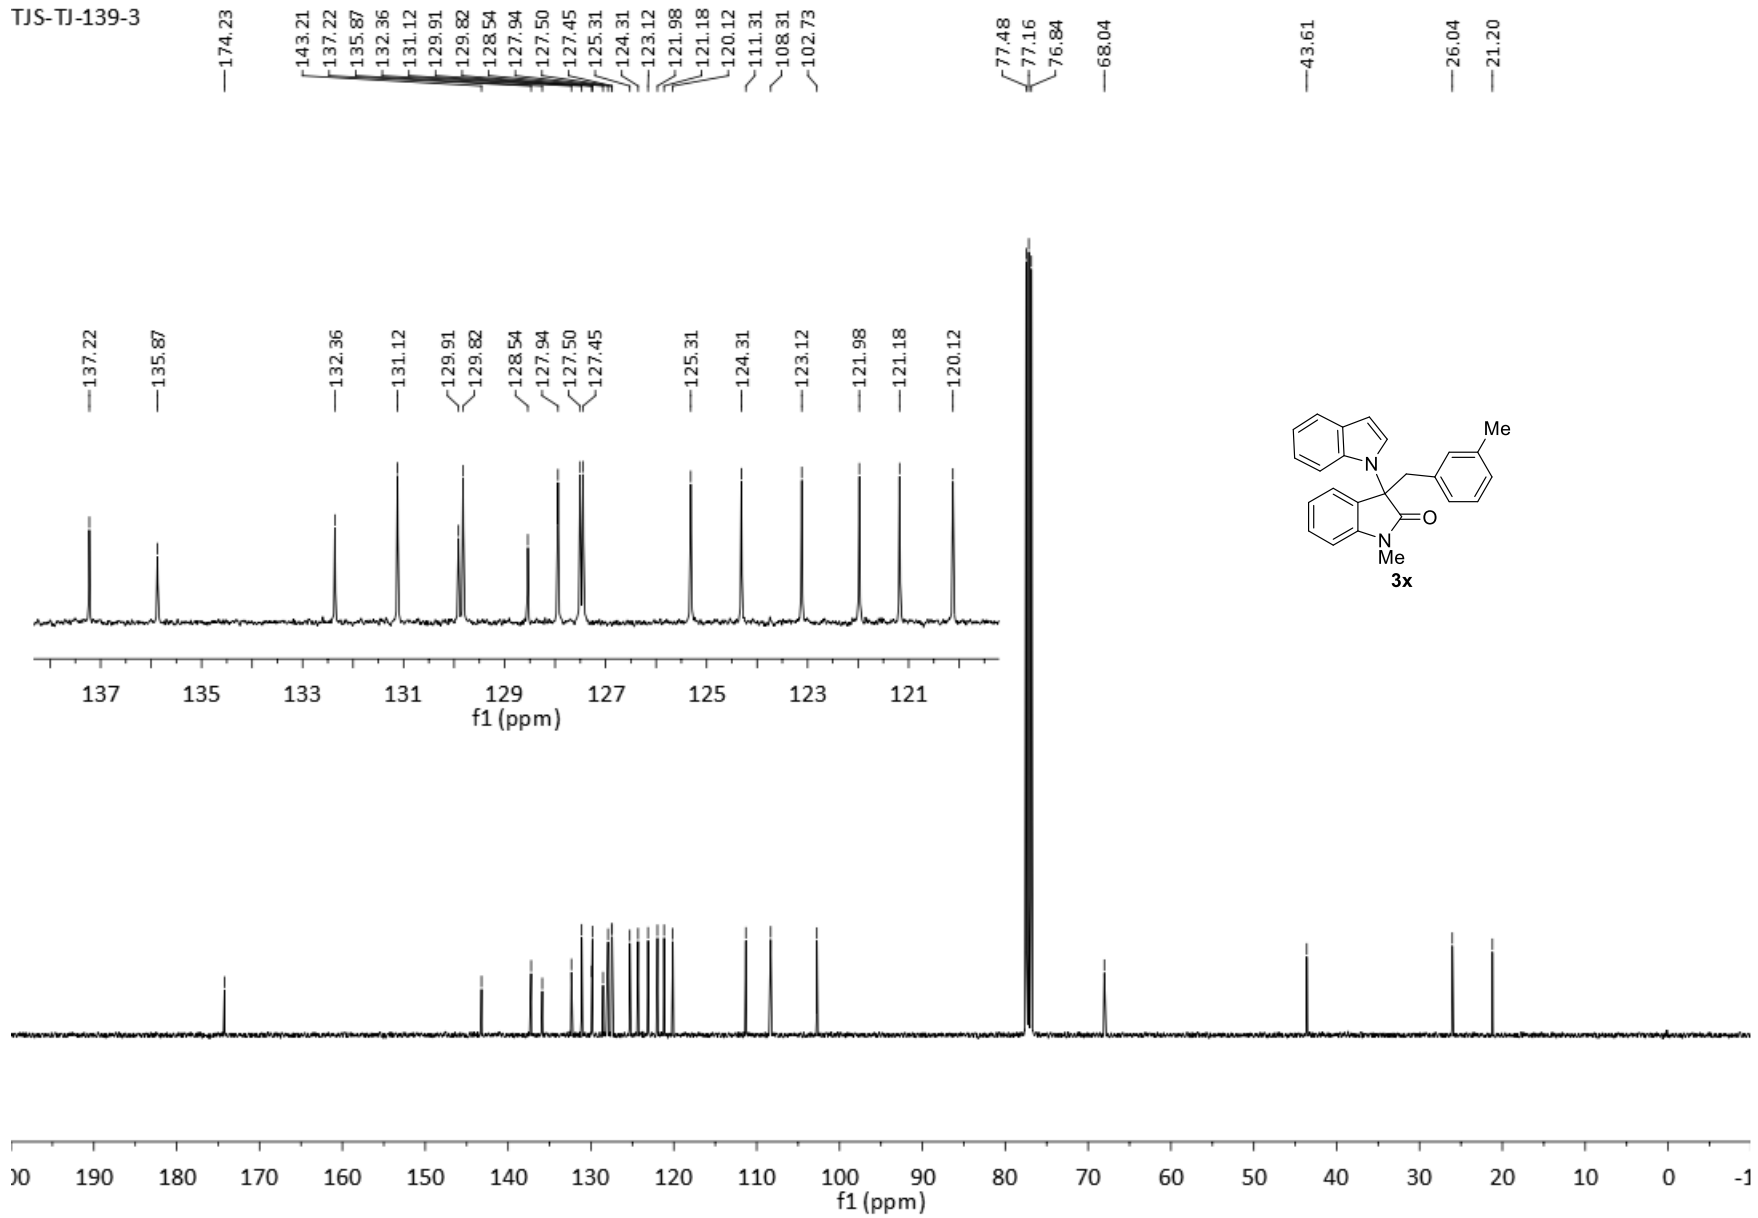

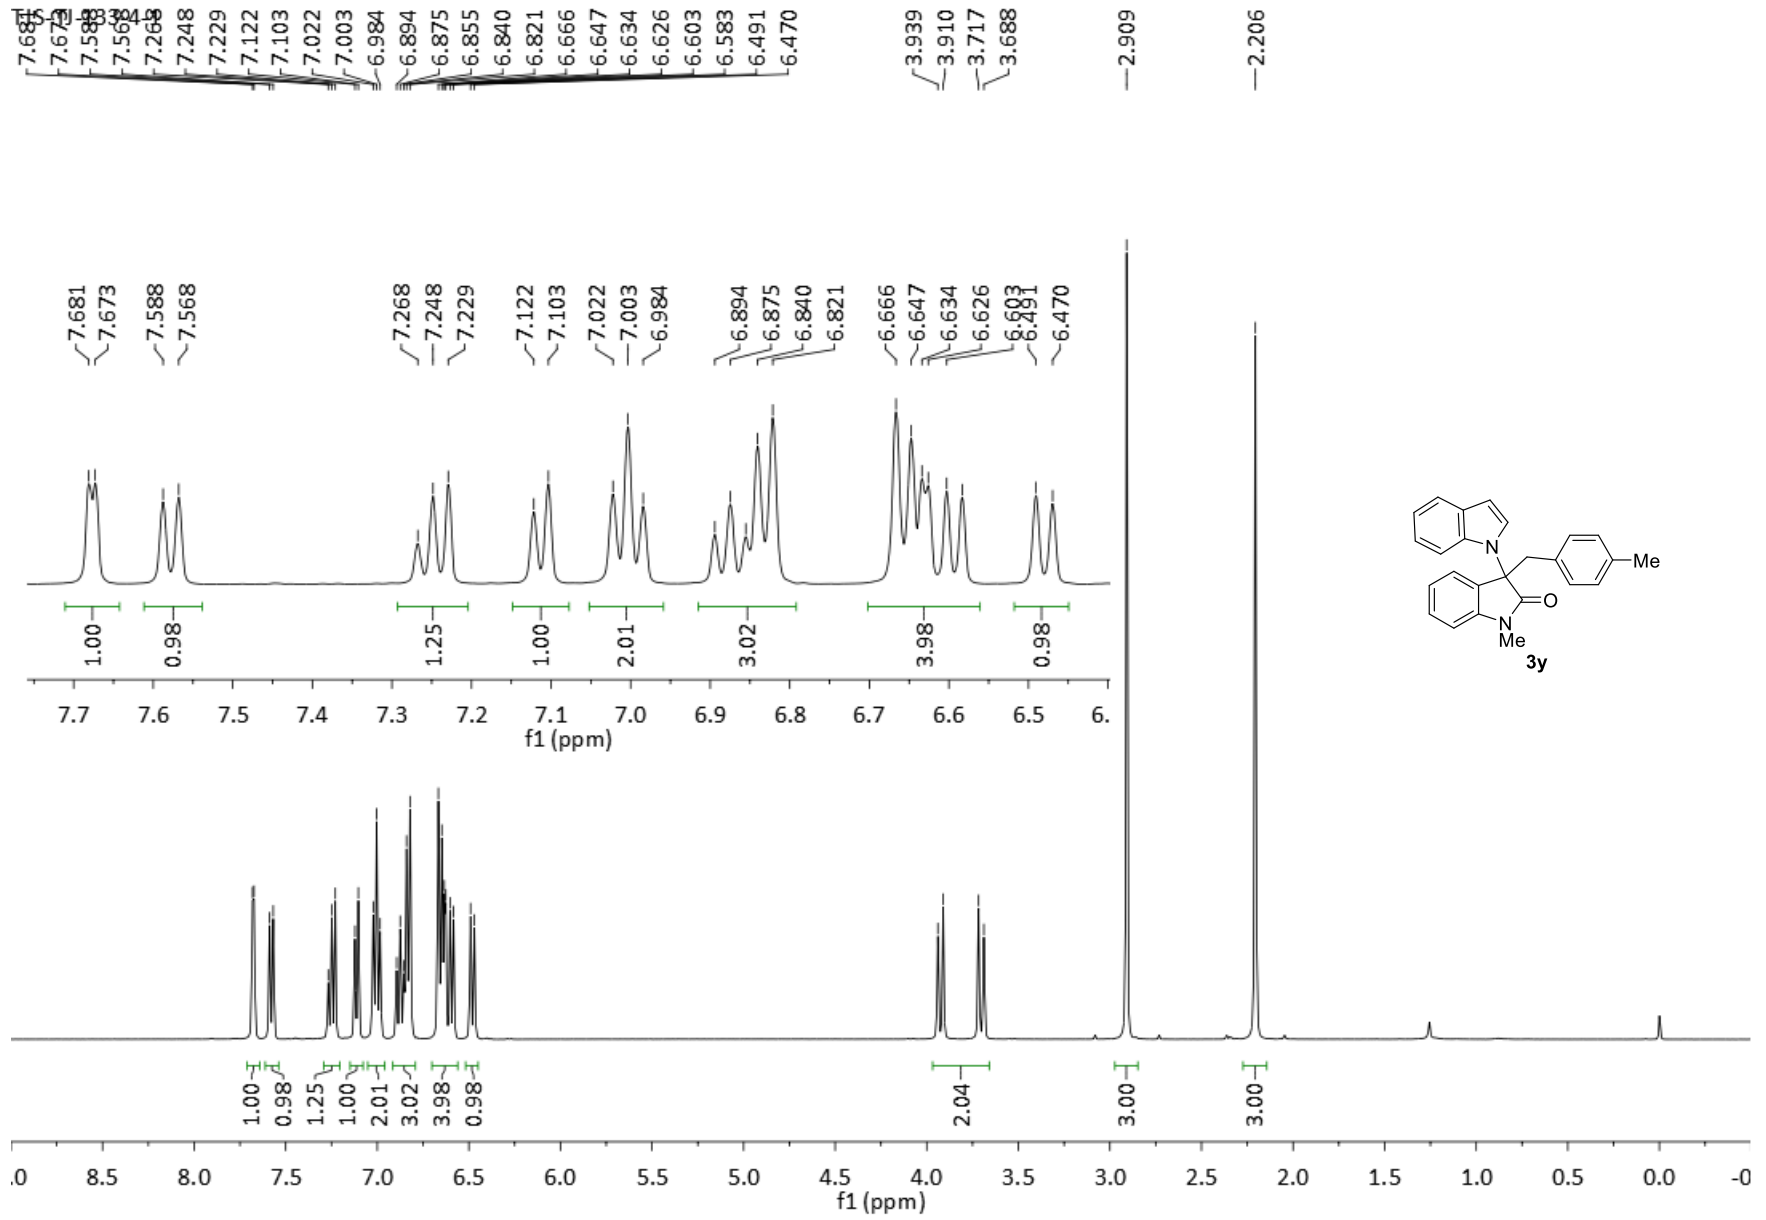

TJS-TJ-133-4-1

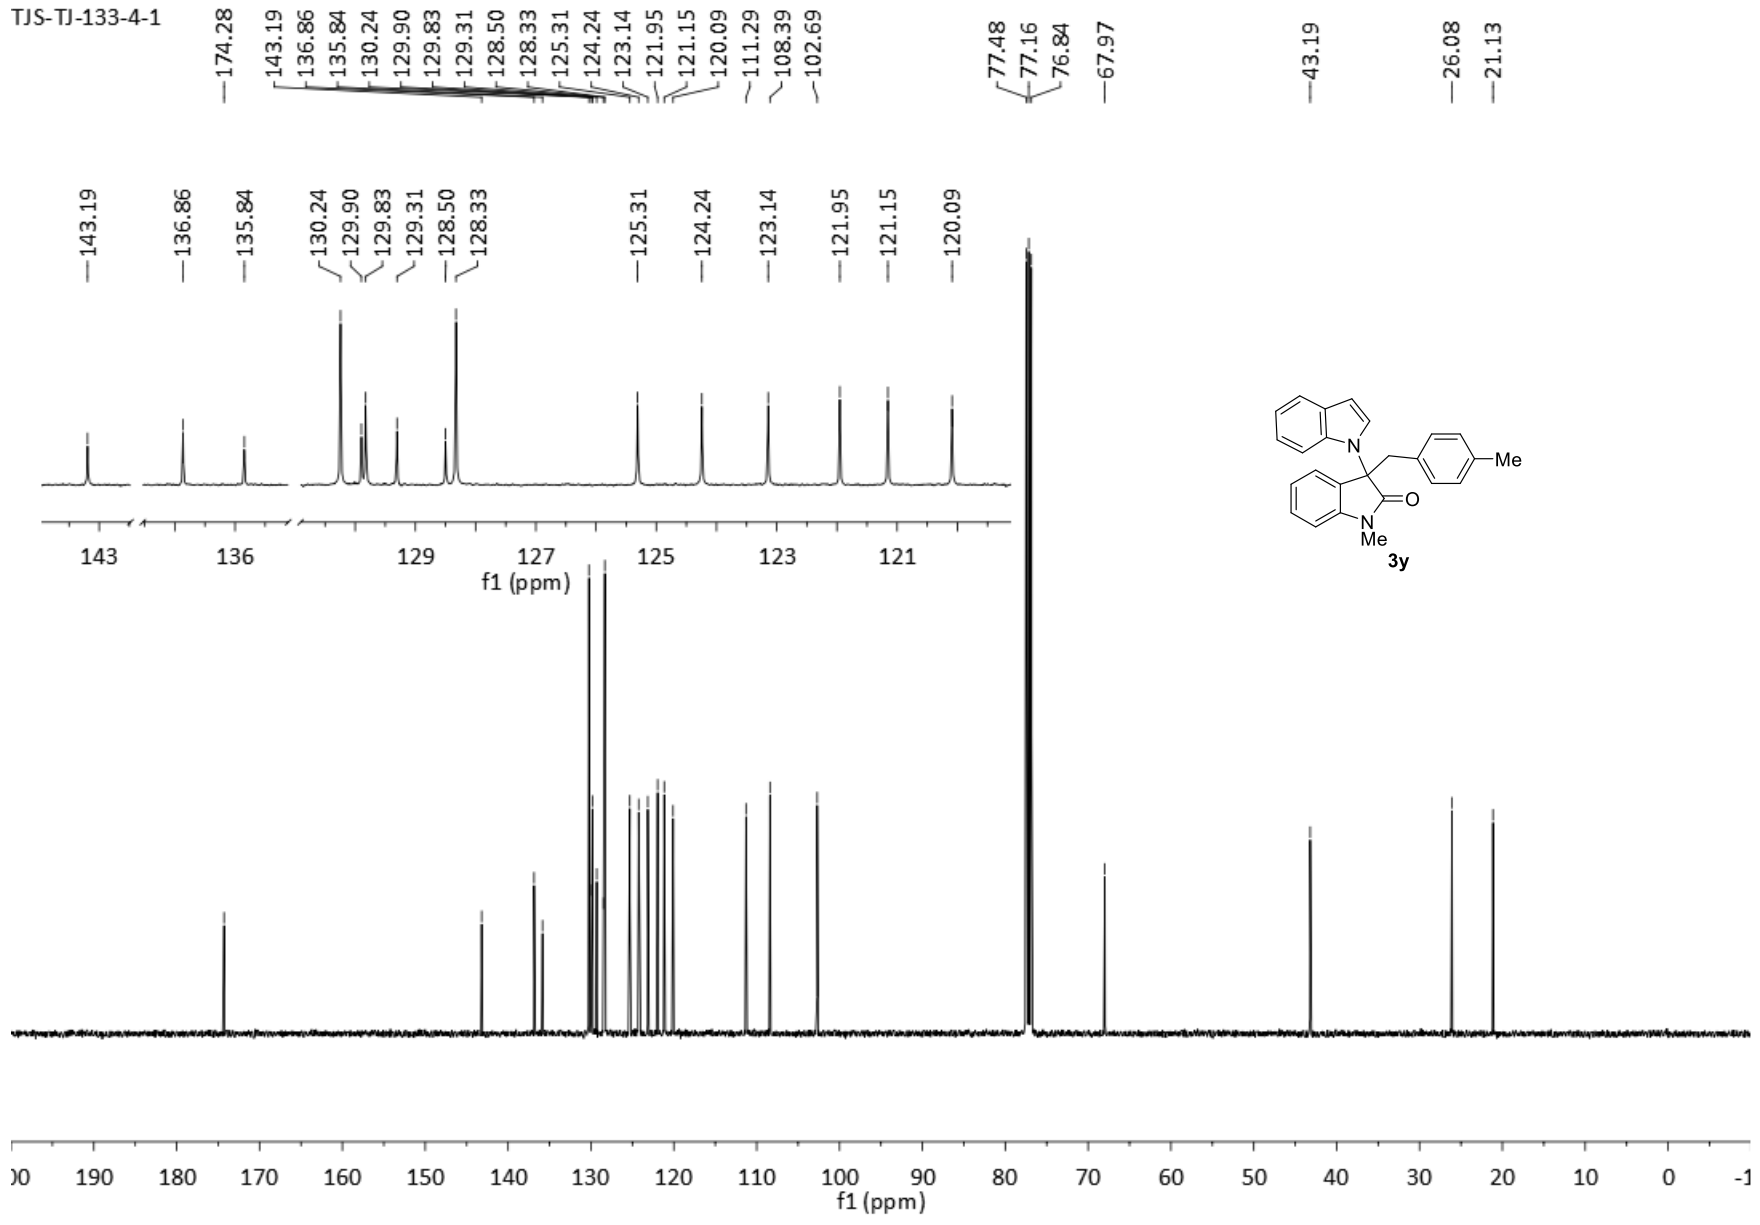

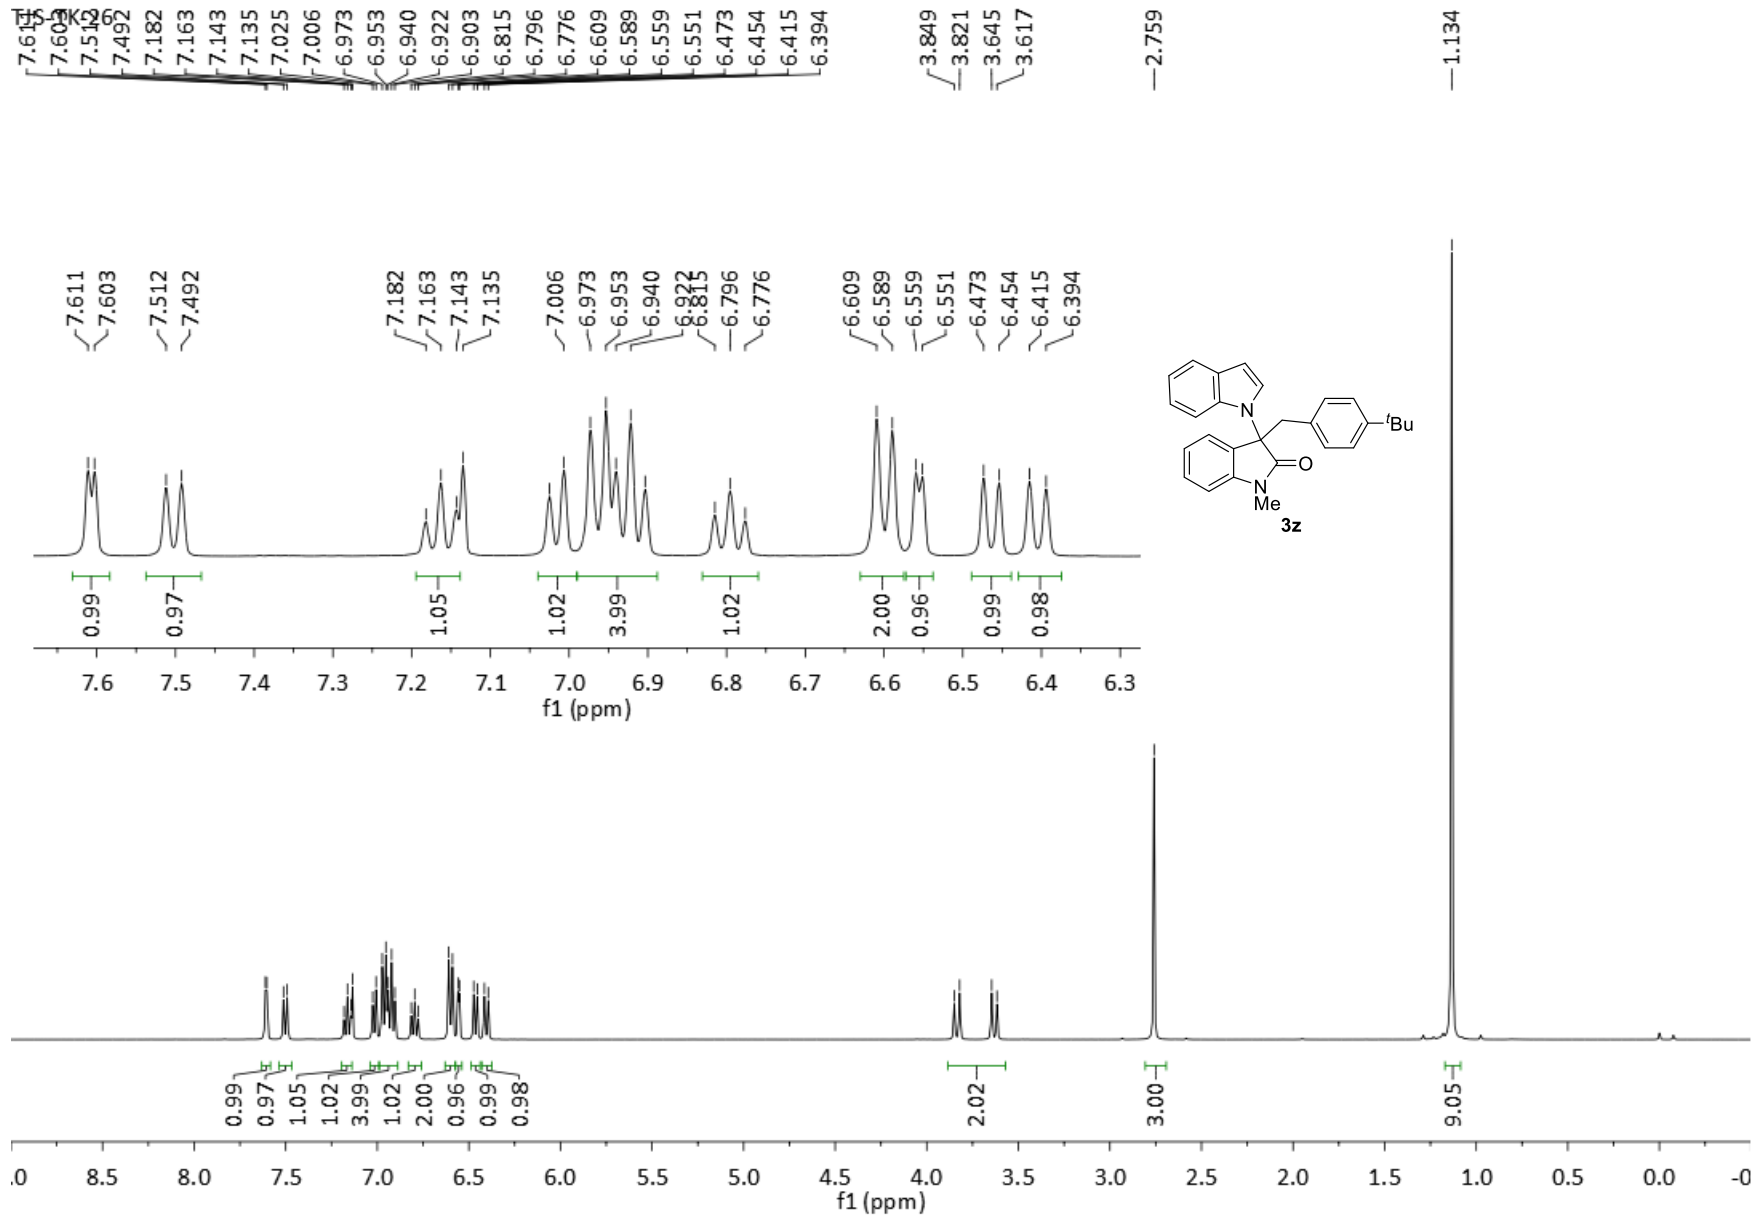

TJS-TK-26

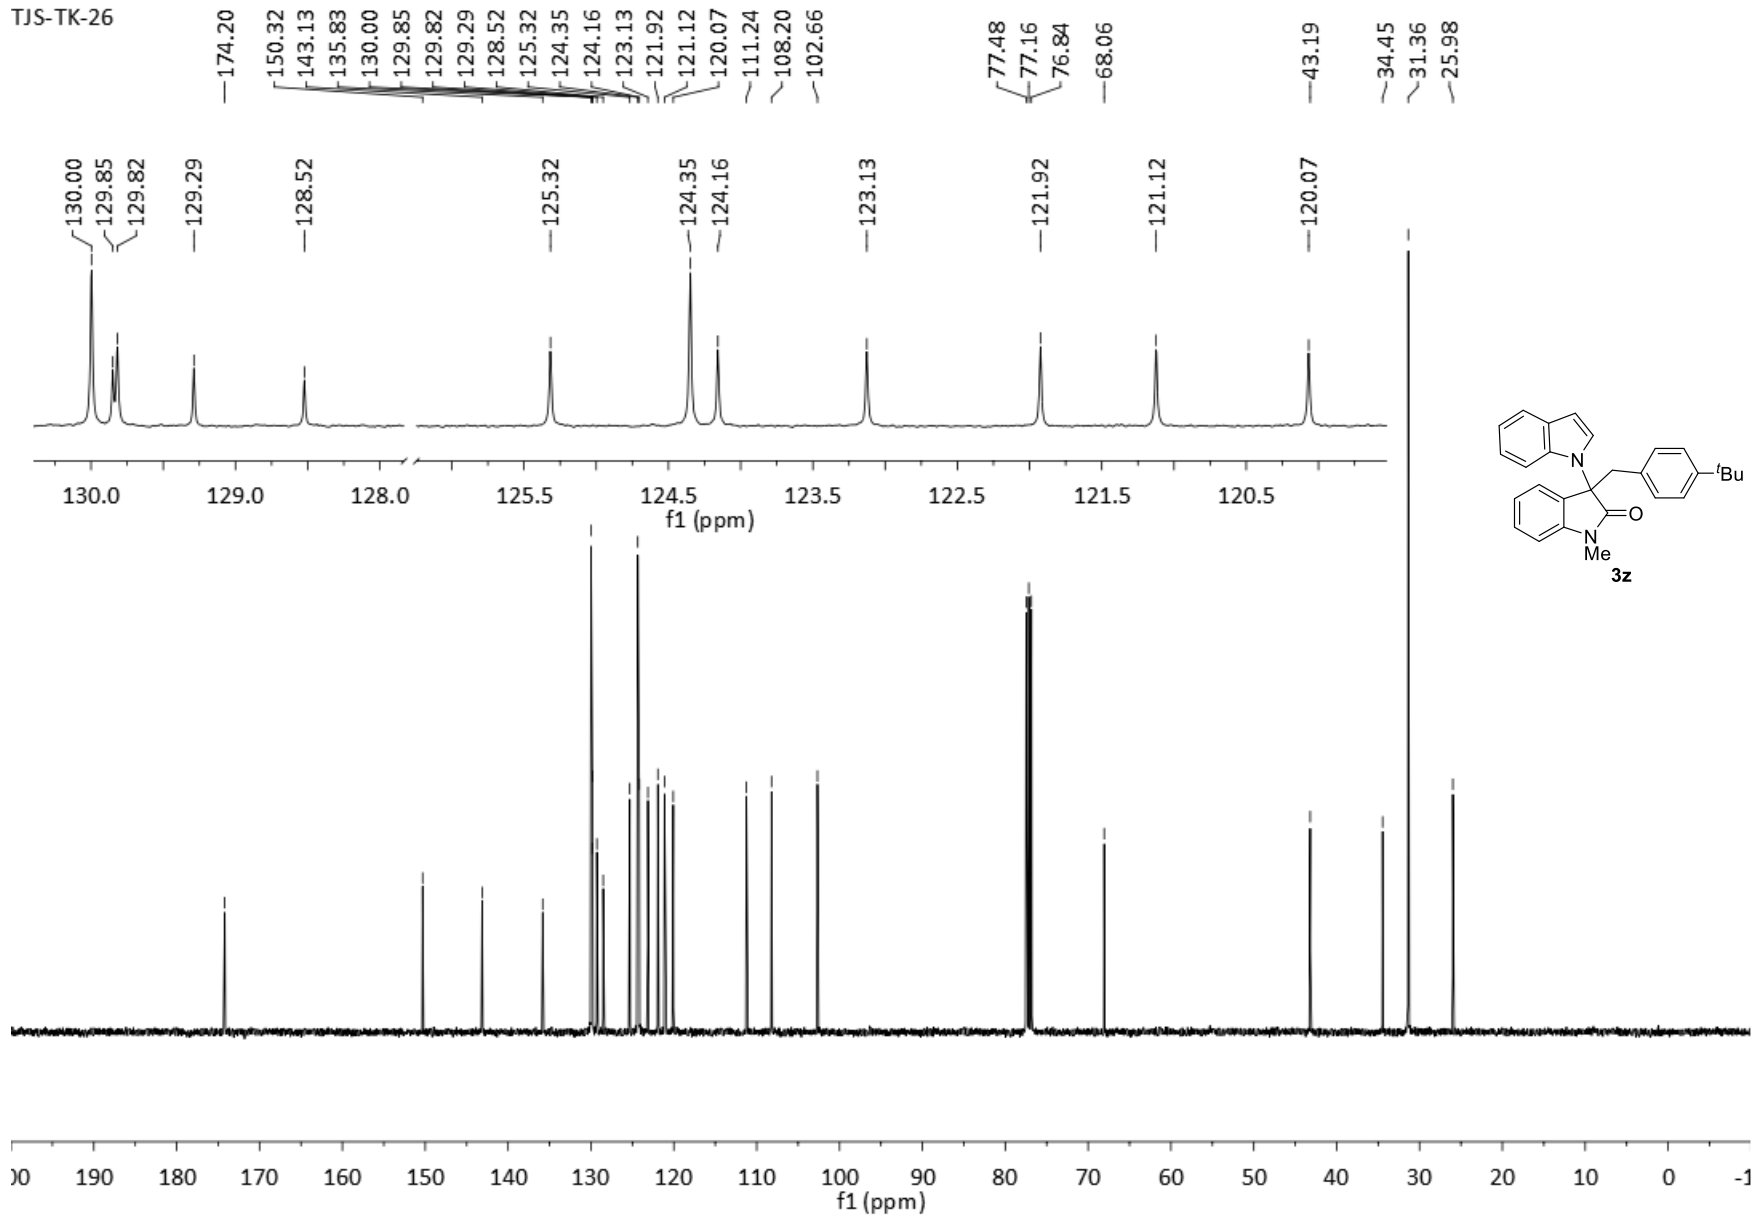

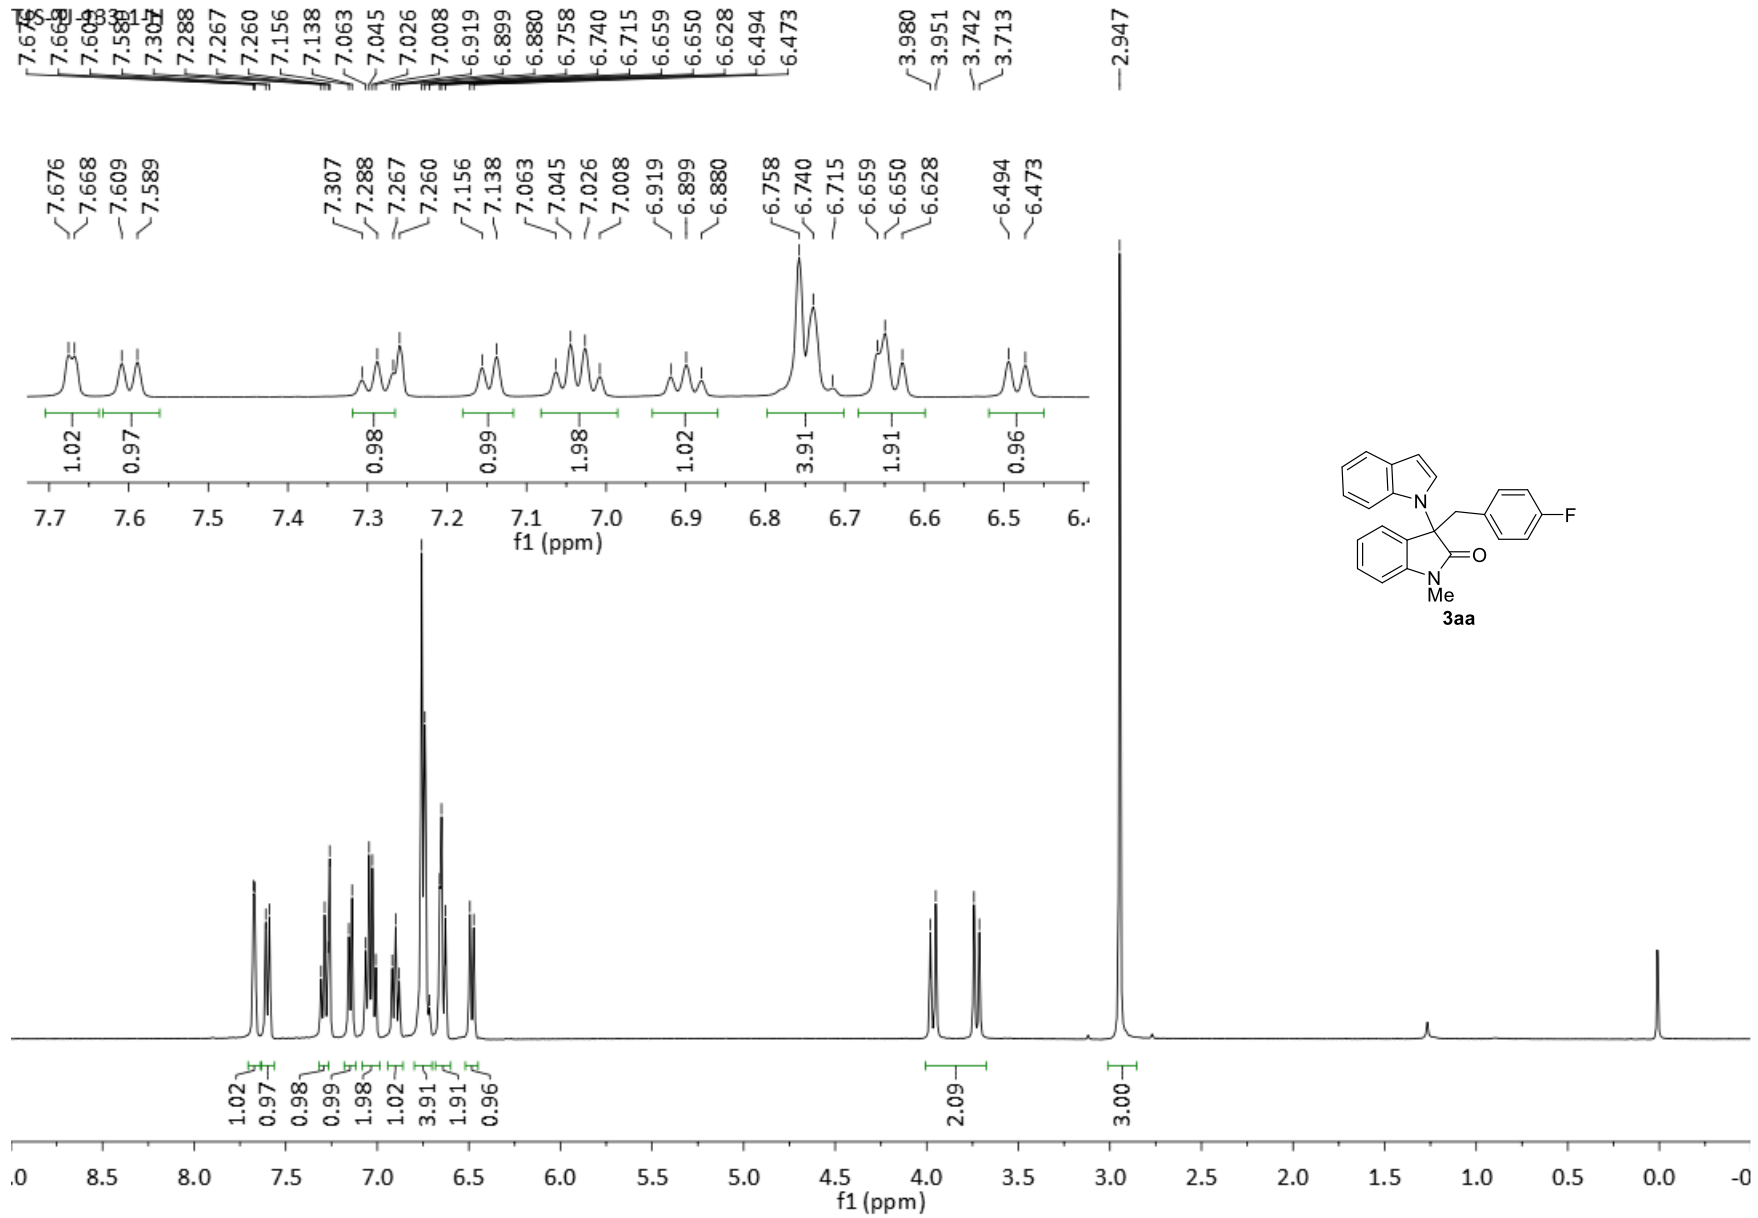



TJS-TJ-133-1-1

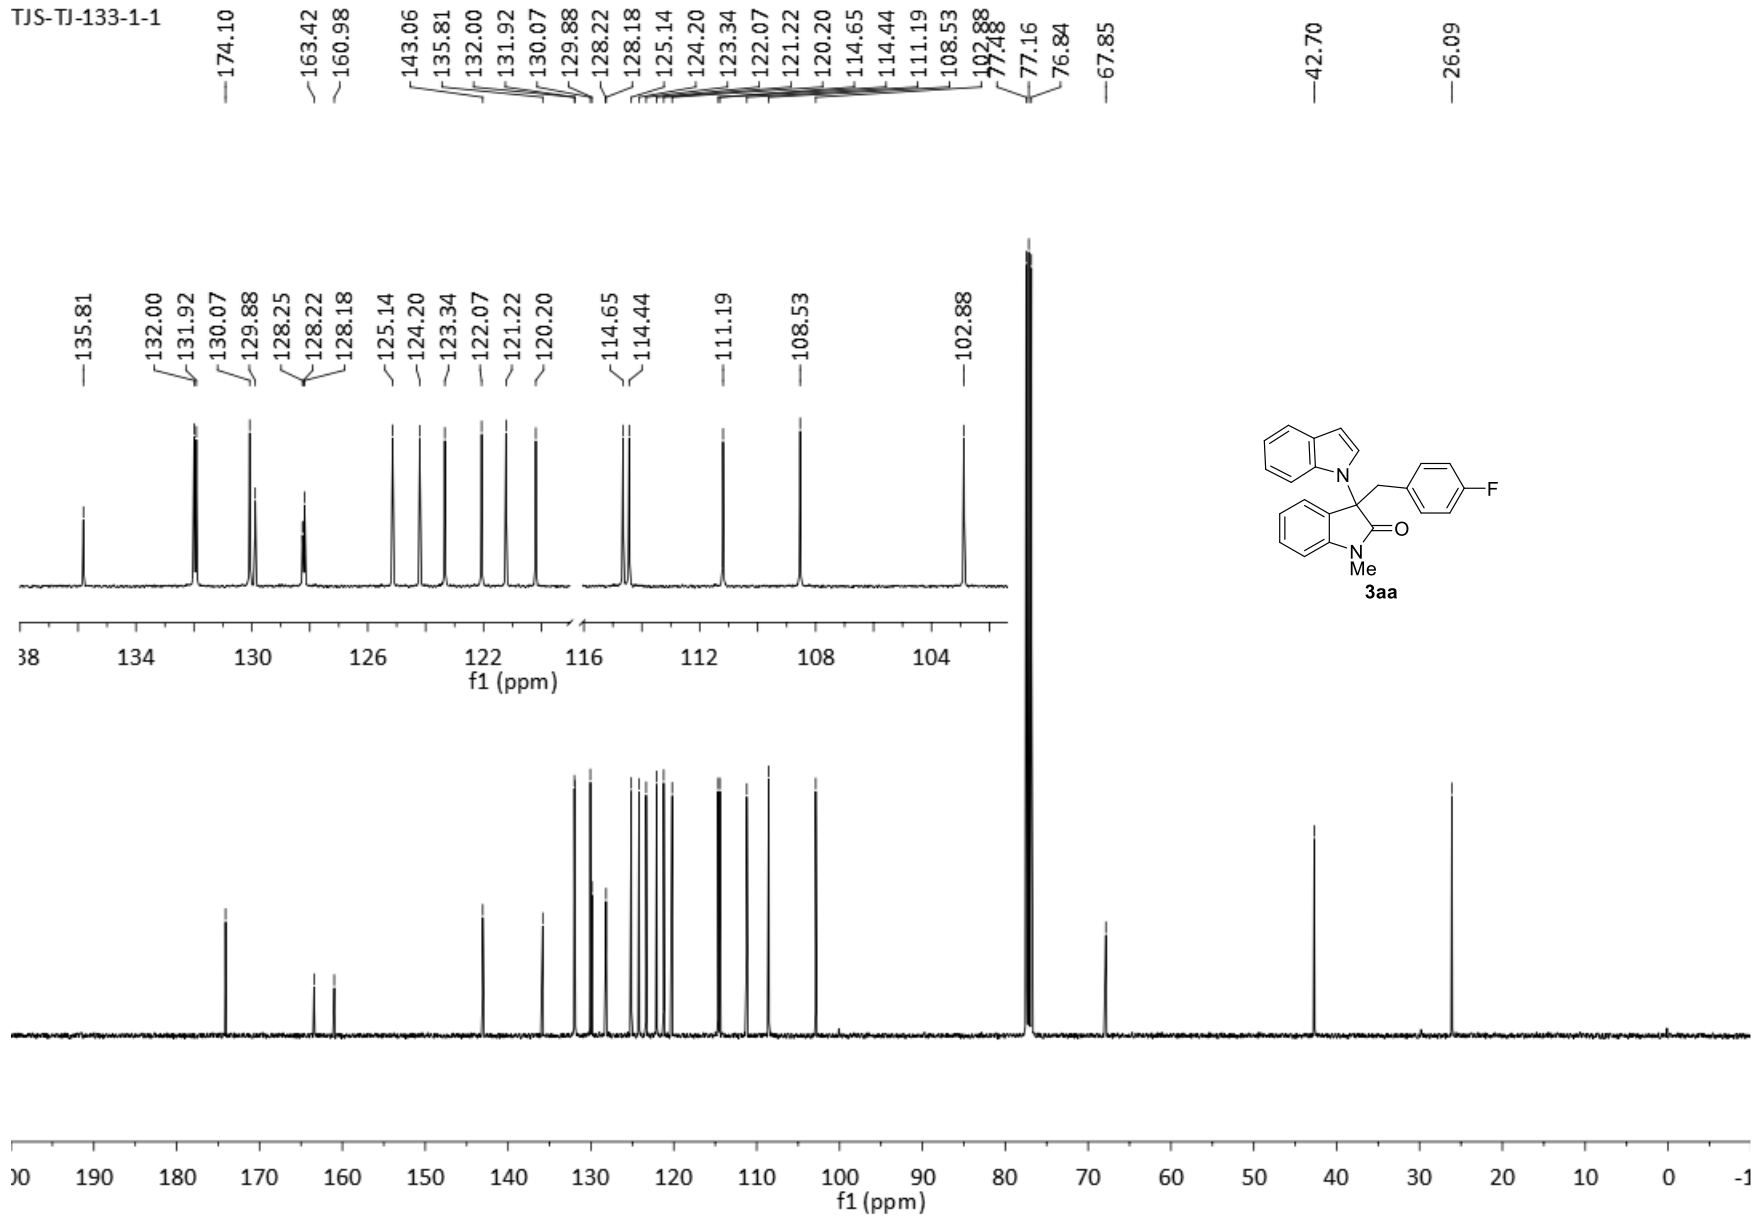

TJS-TJ-133-1

--115.064

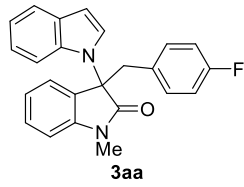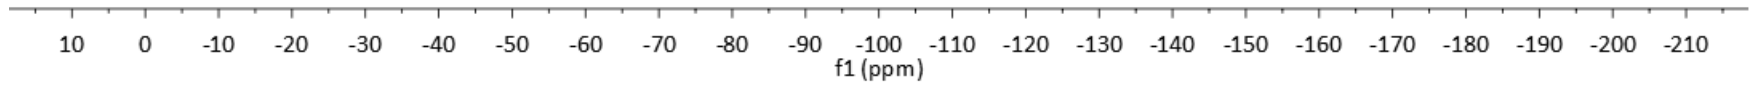

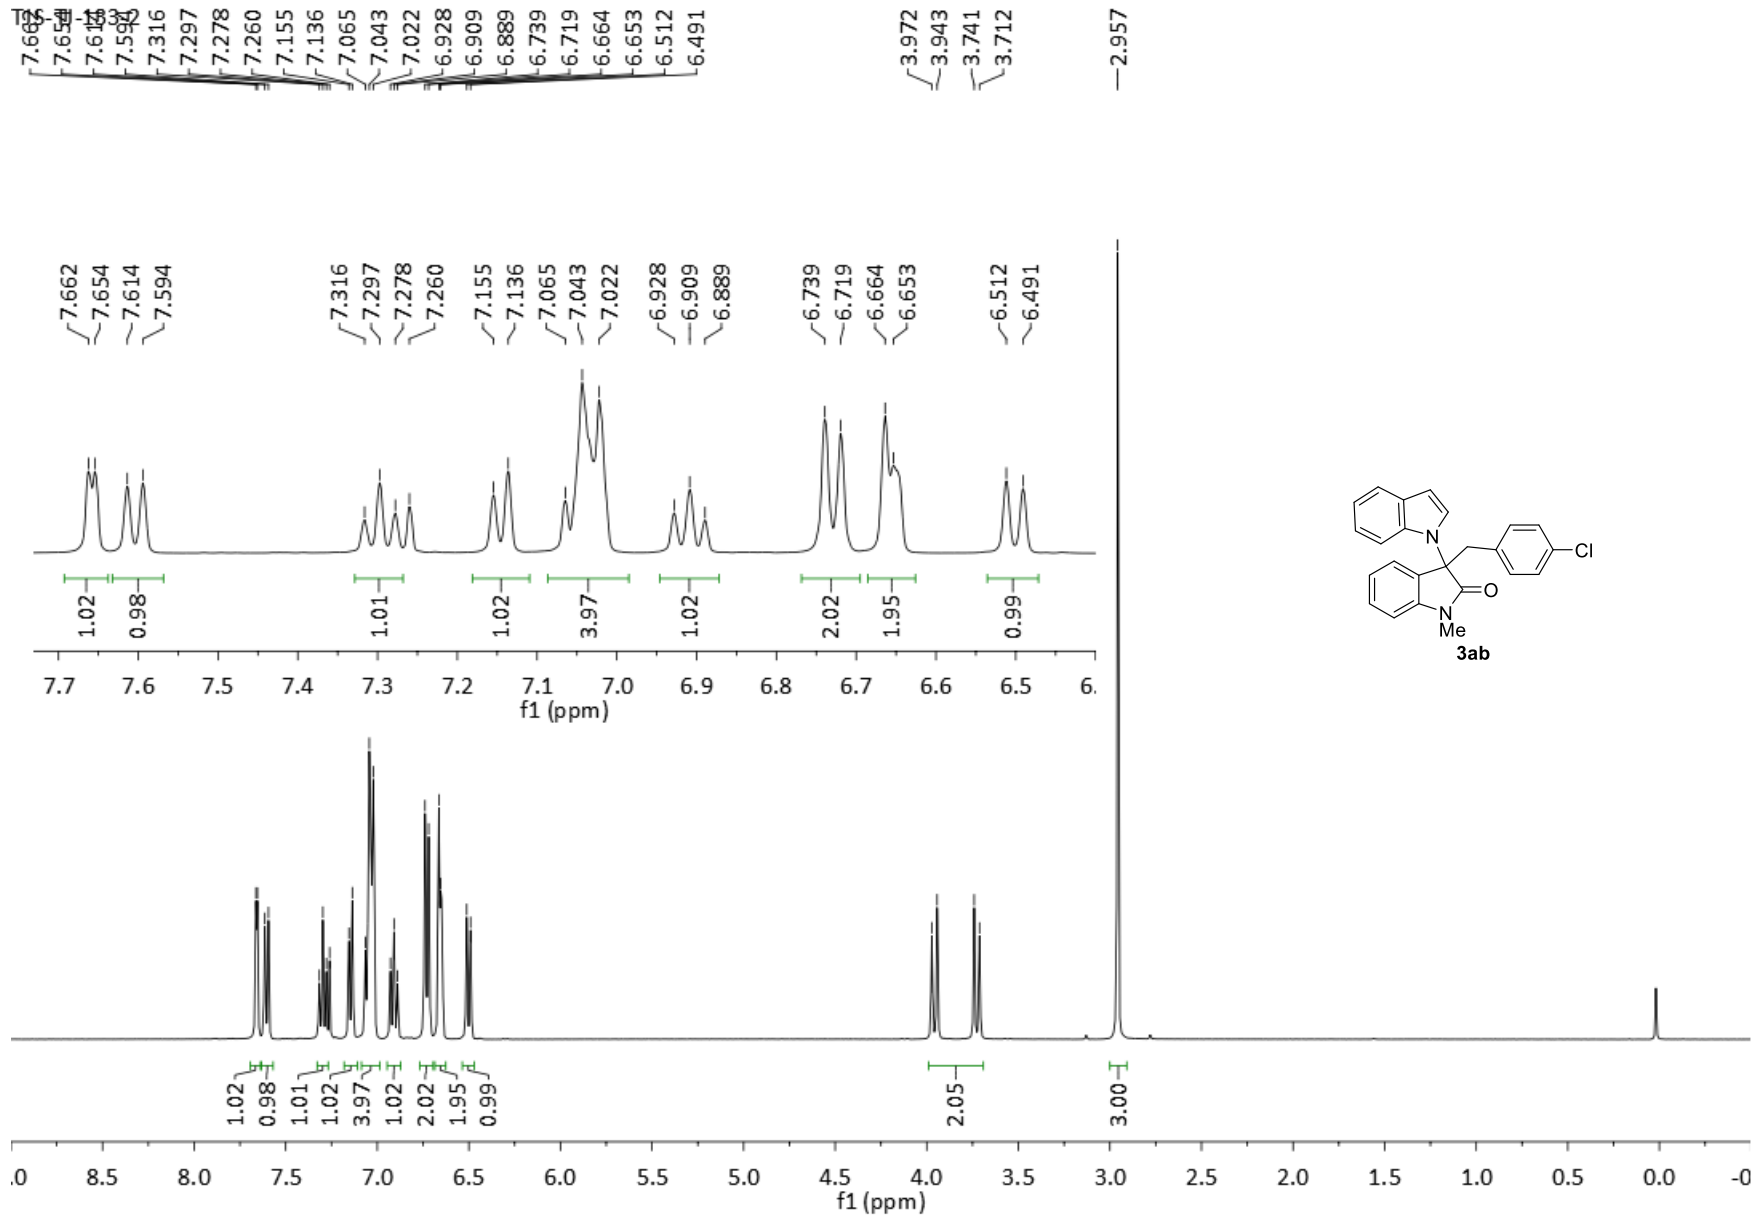

TJS-TJ-133-2-1

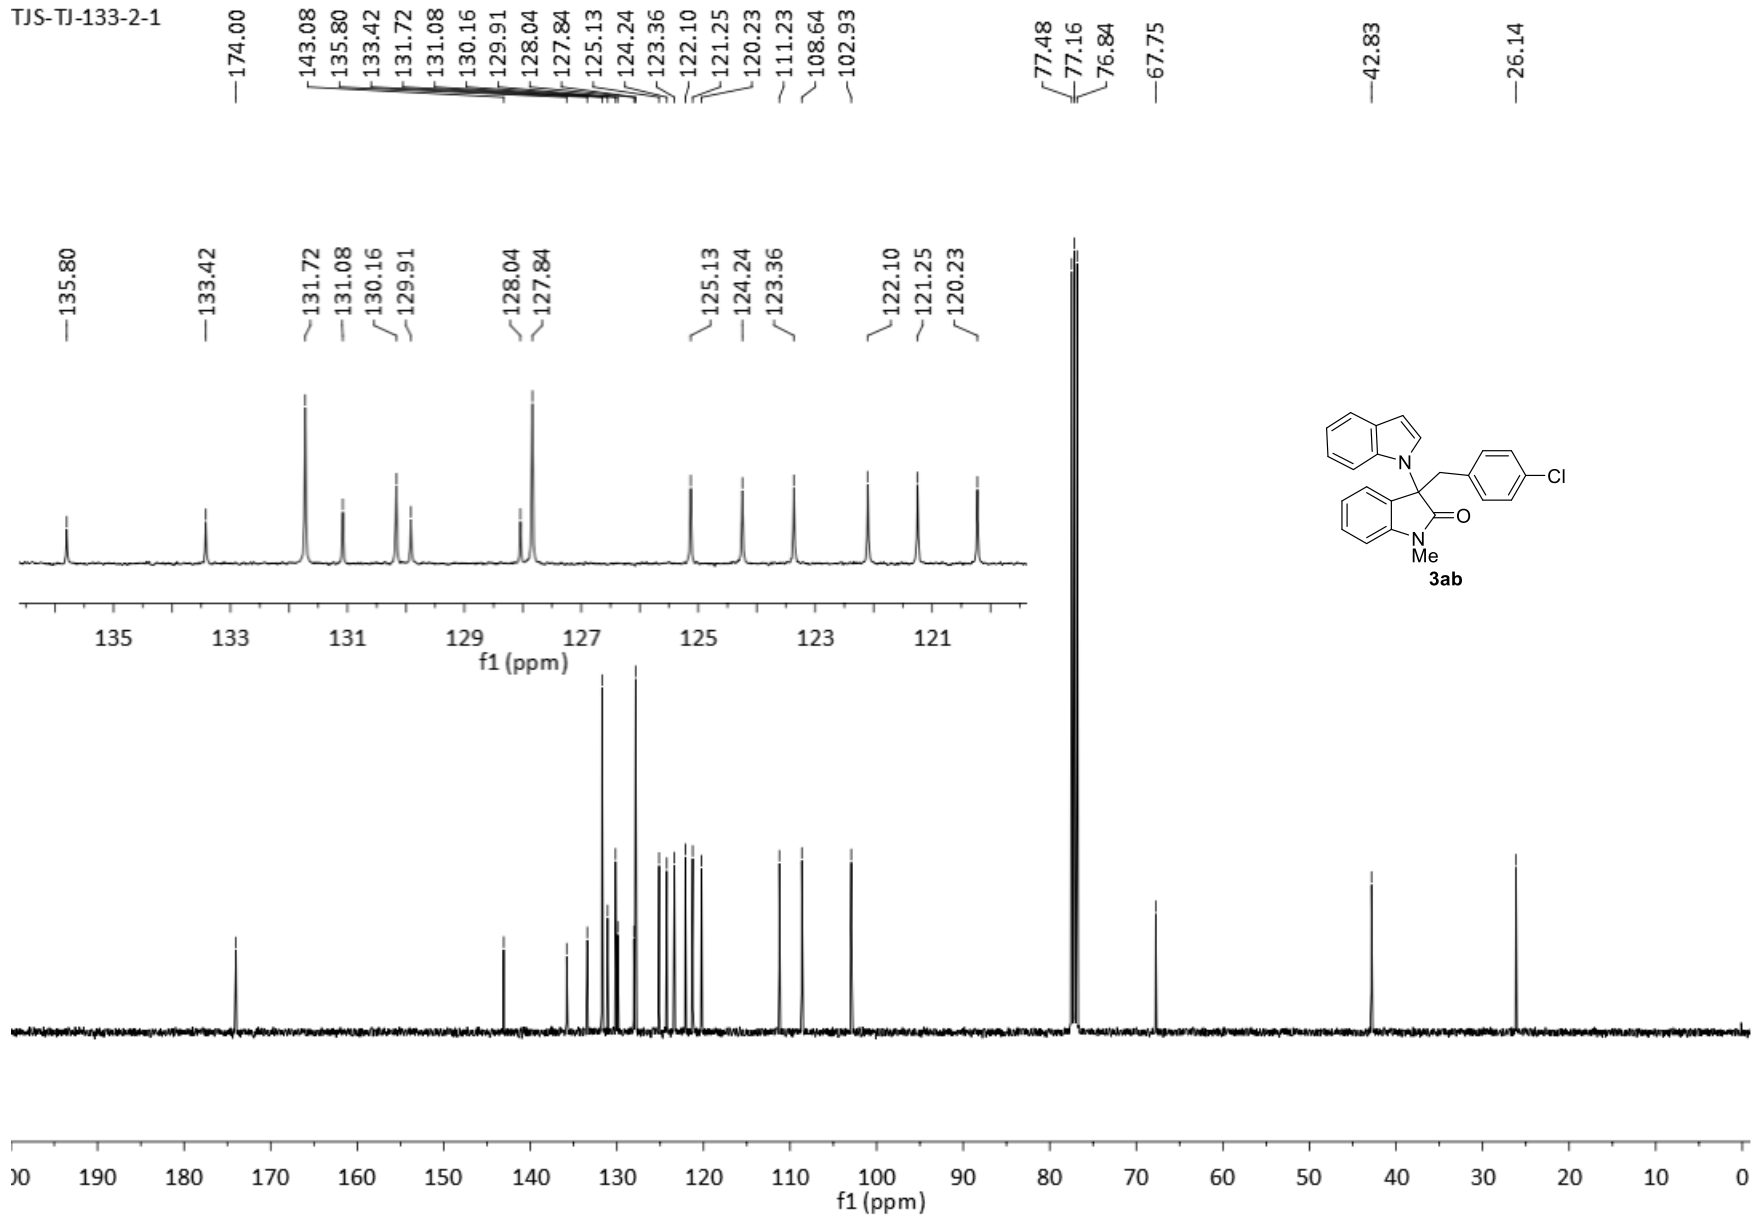

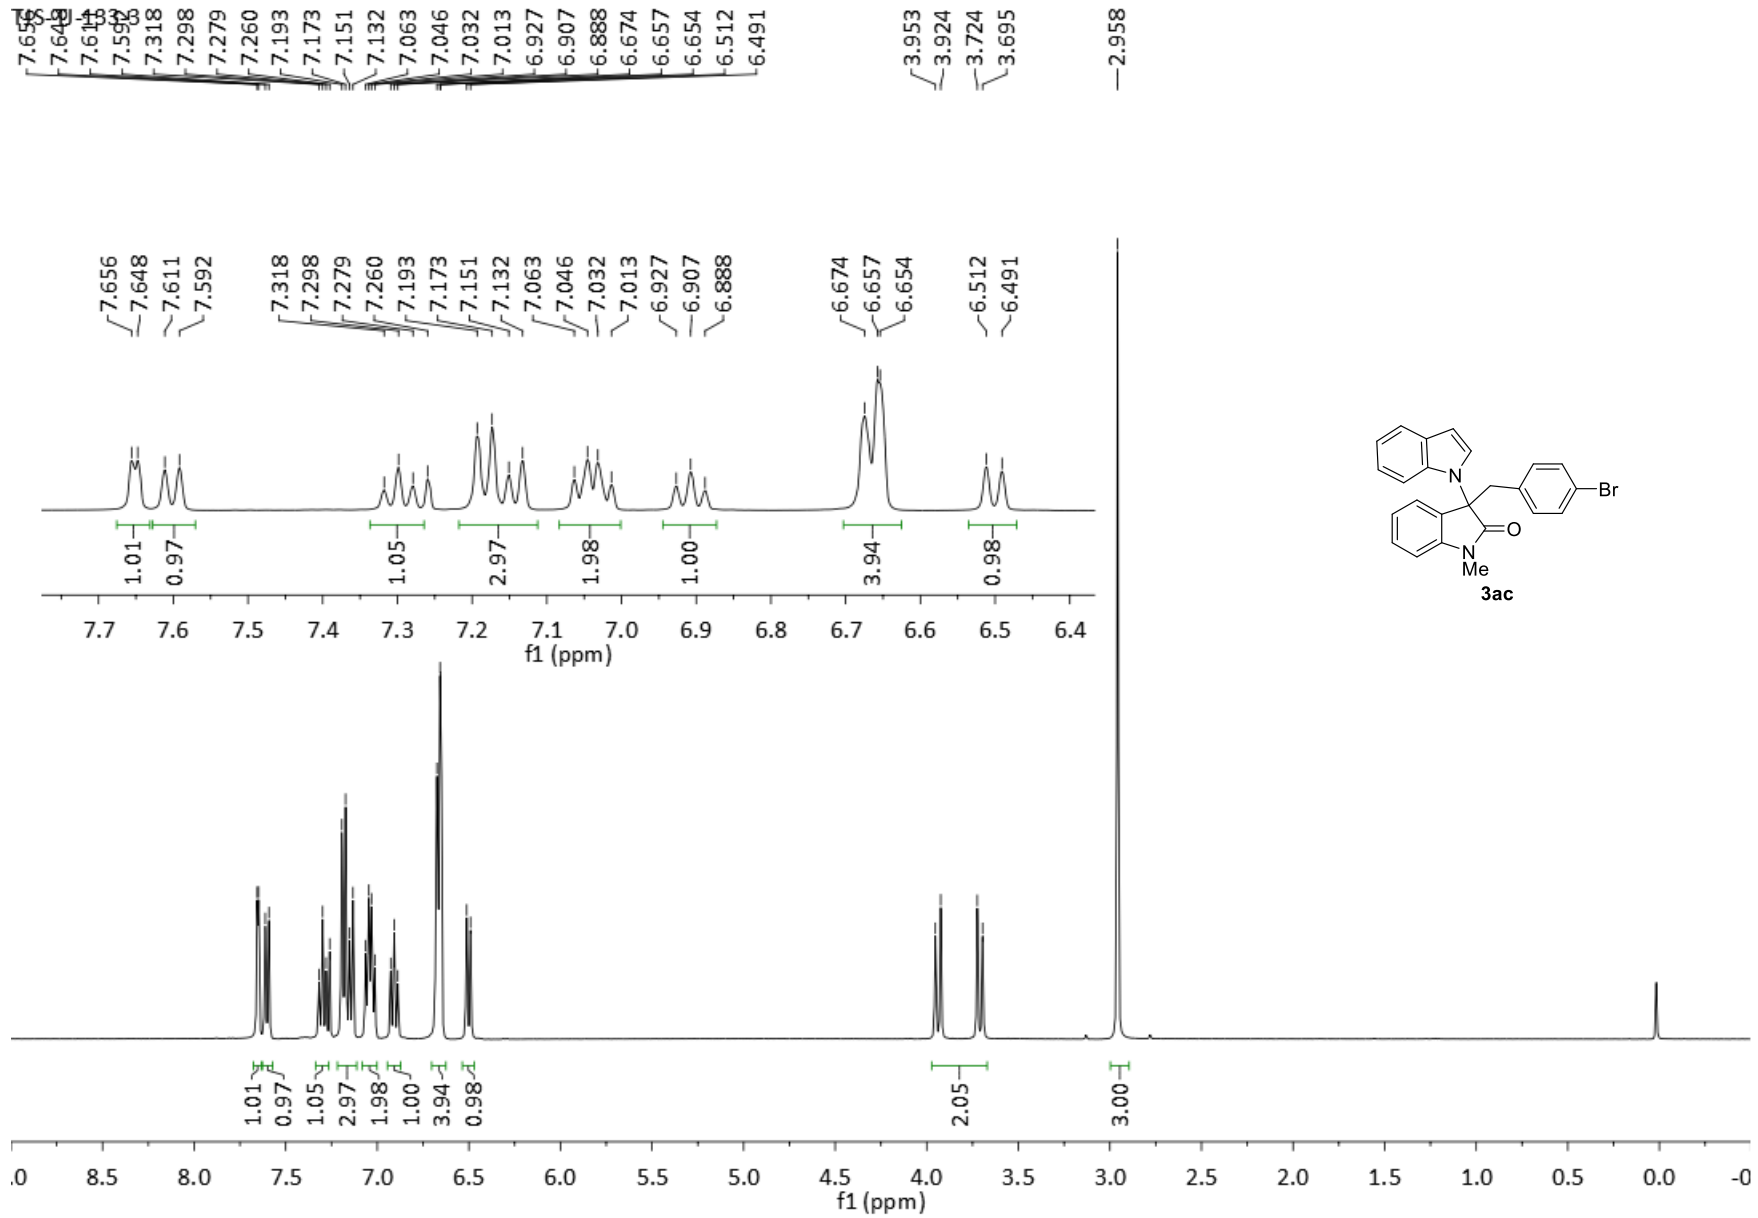

TJS-TJ-133-3

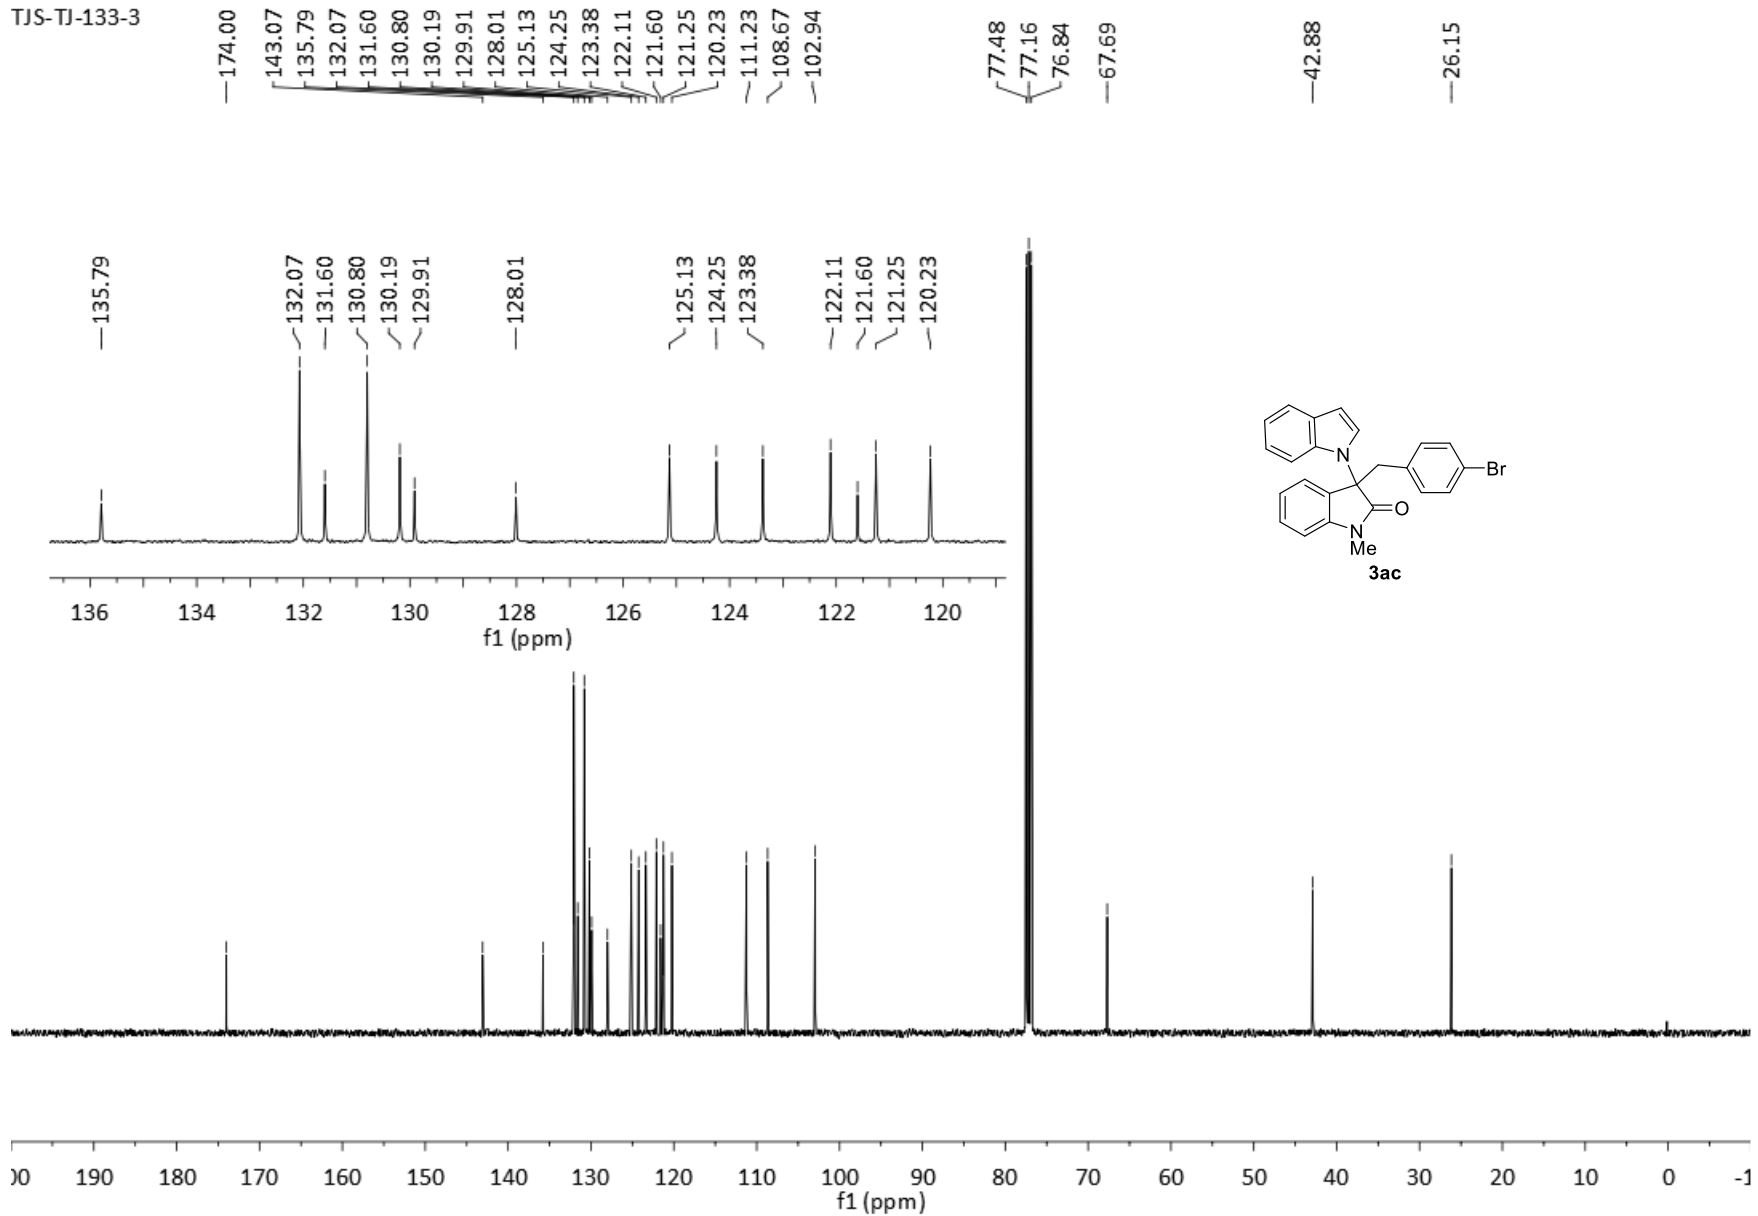

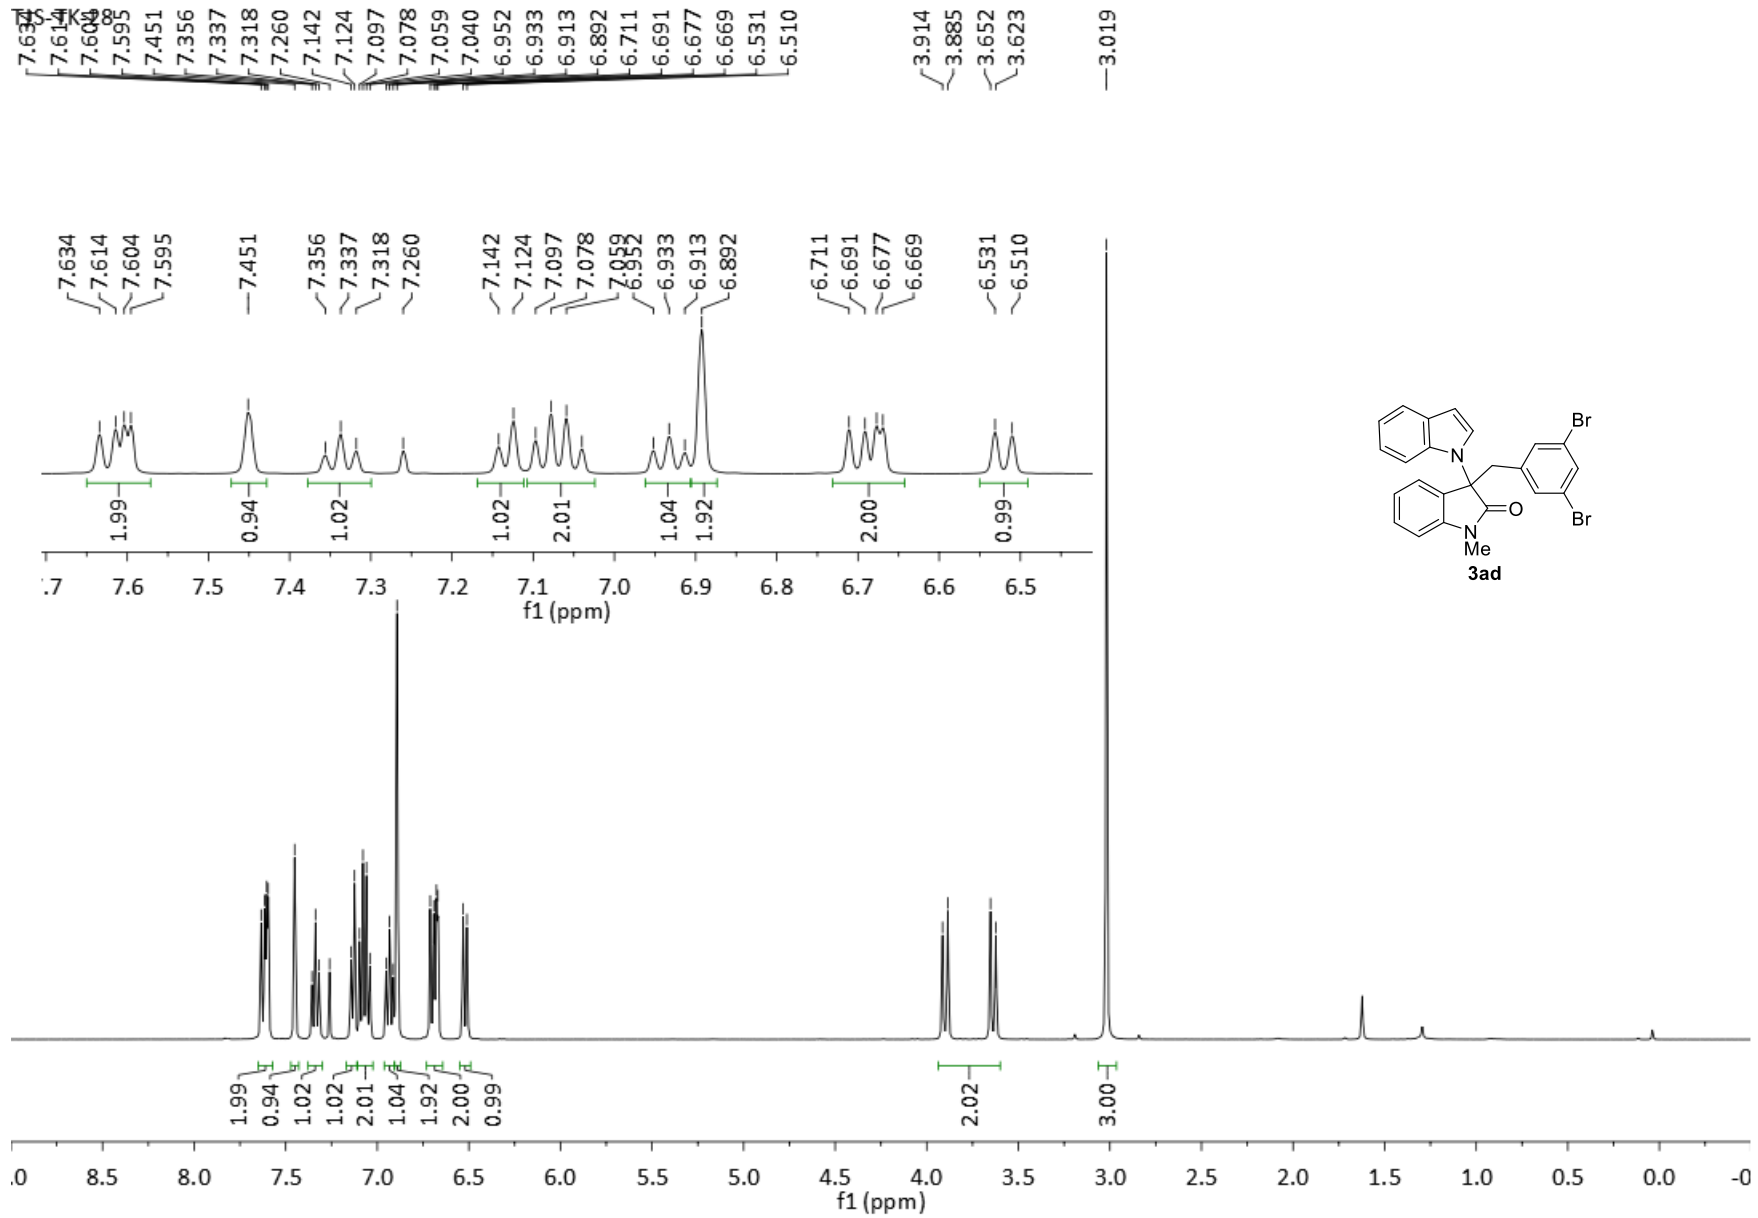

TJS-TK-28

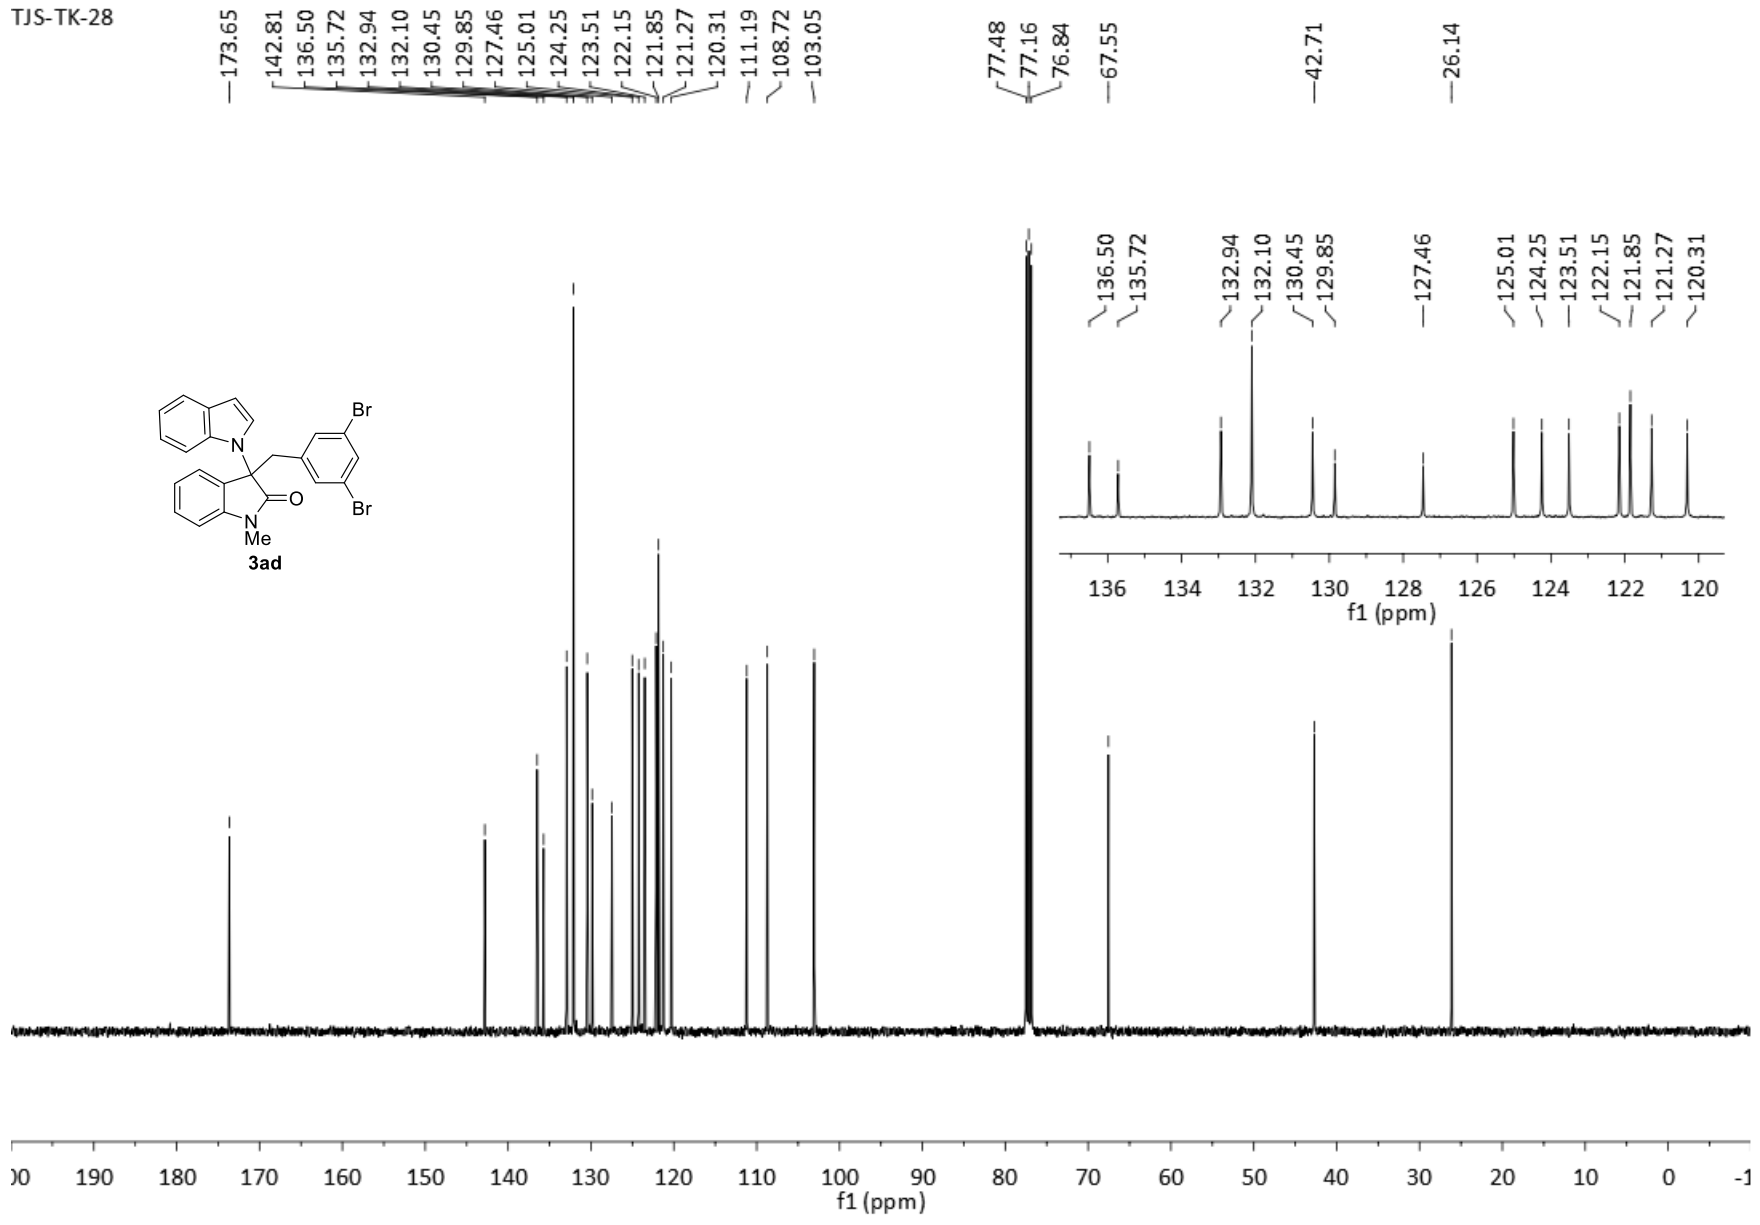



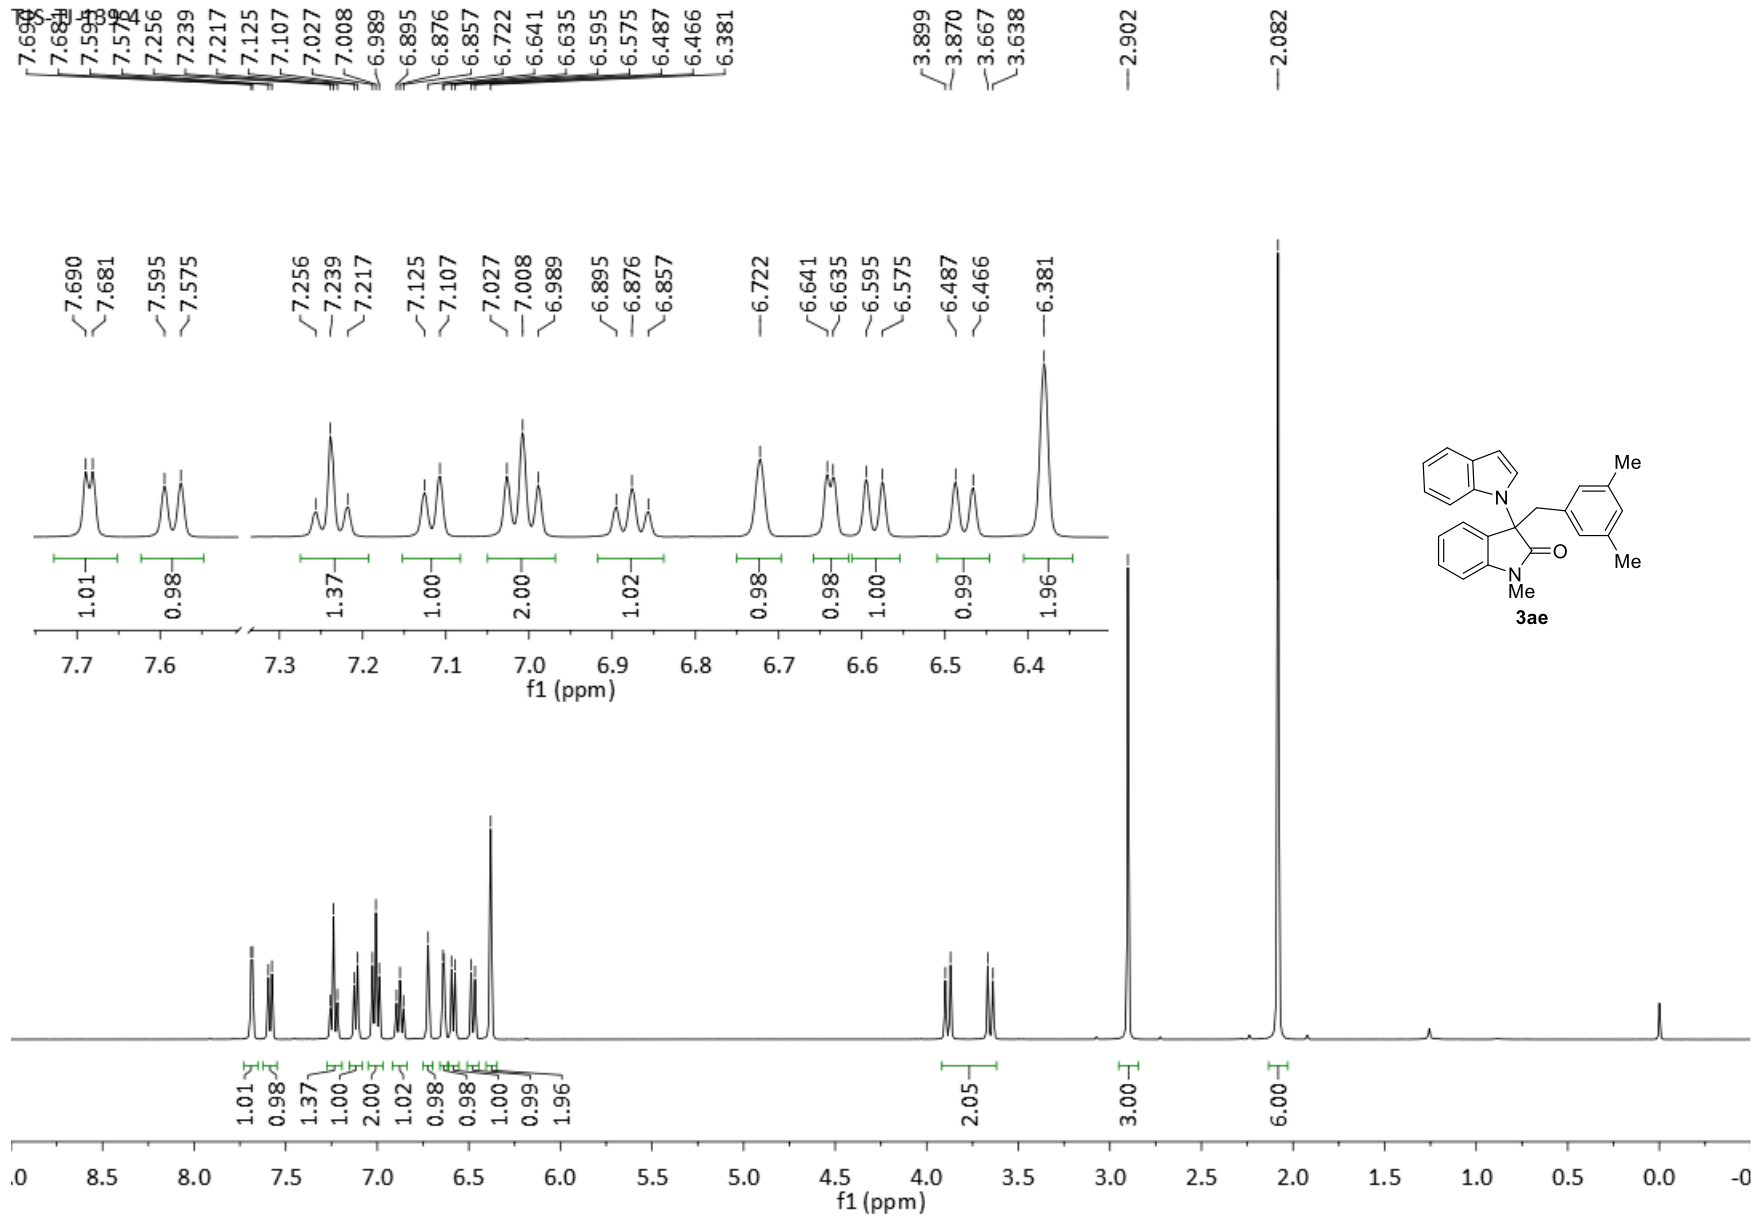

TJS-TJ-139-4

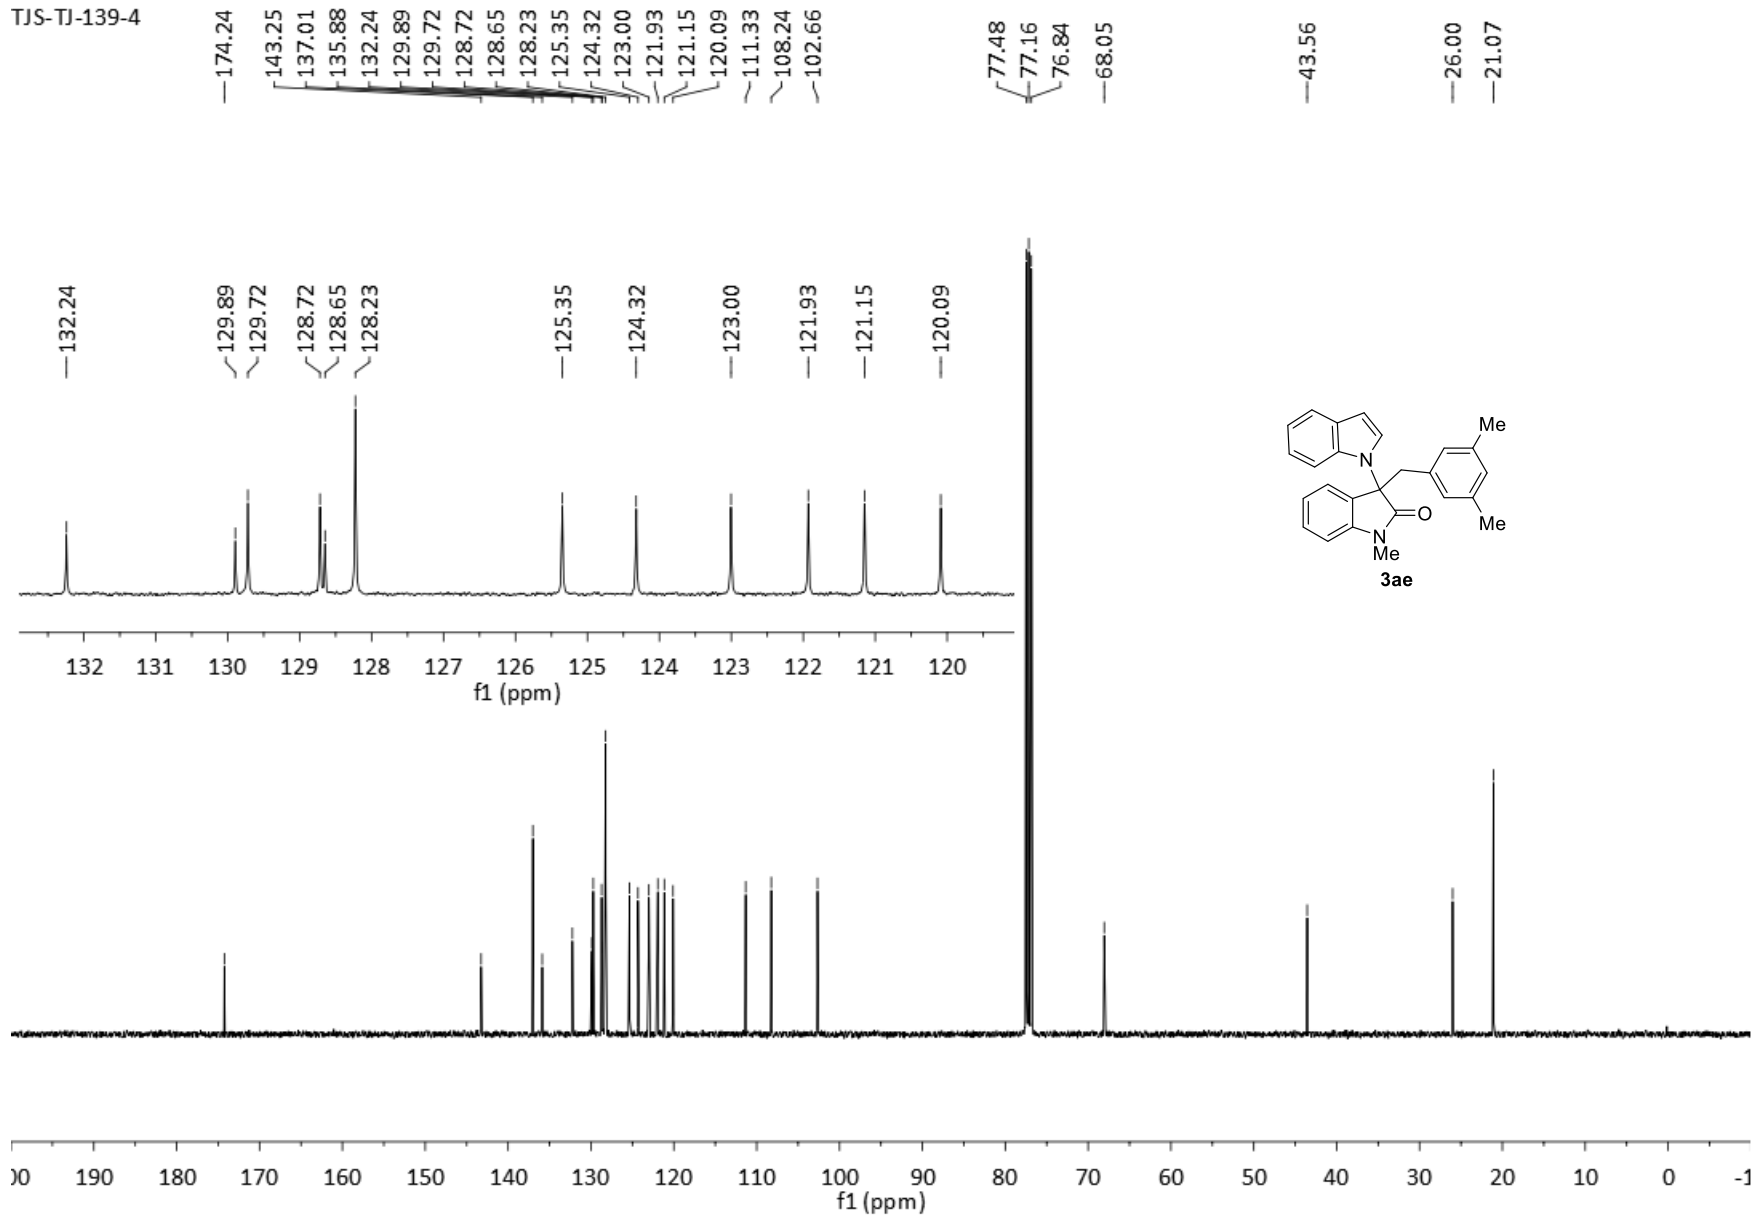

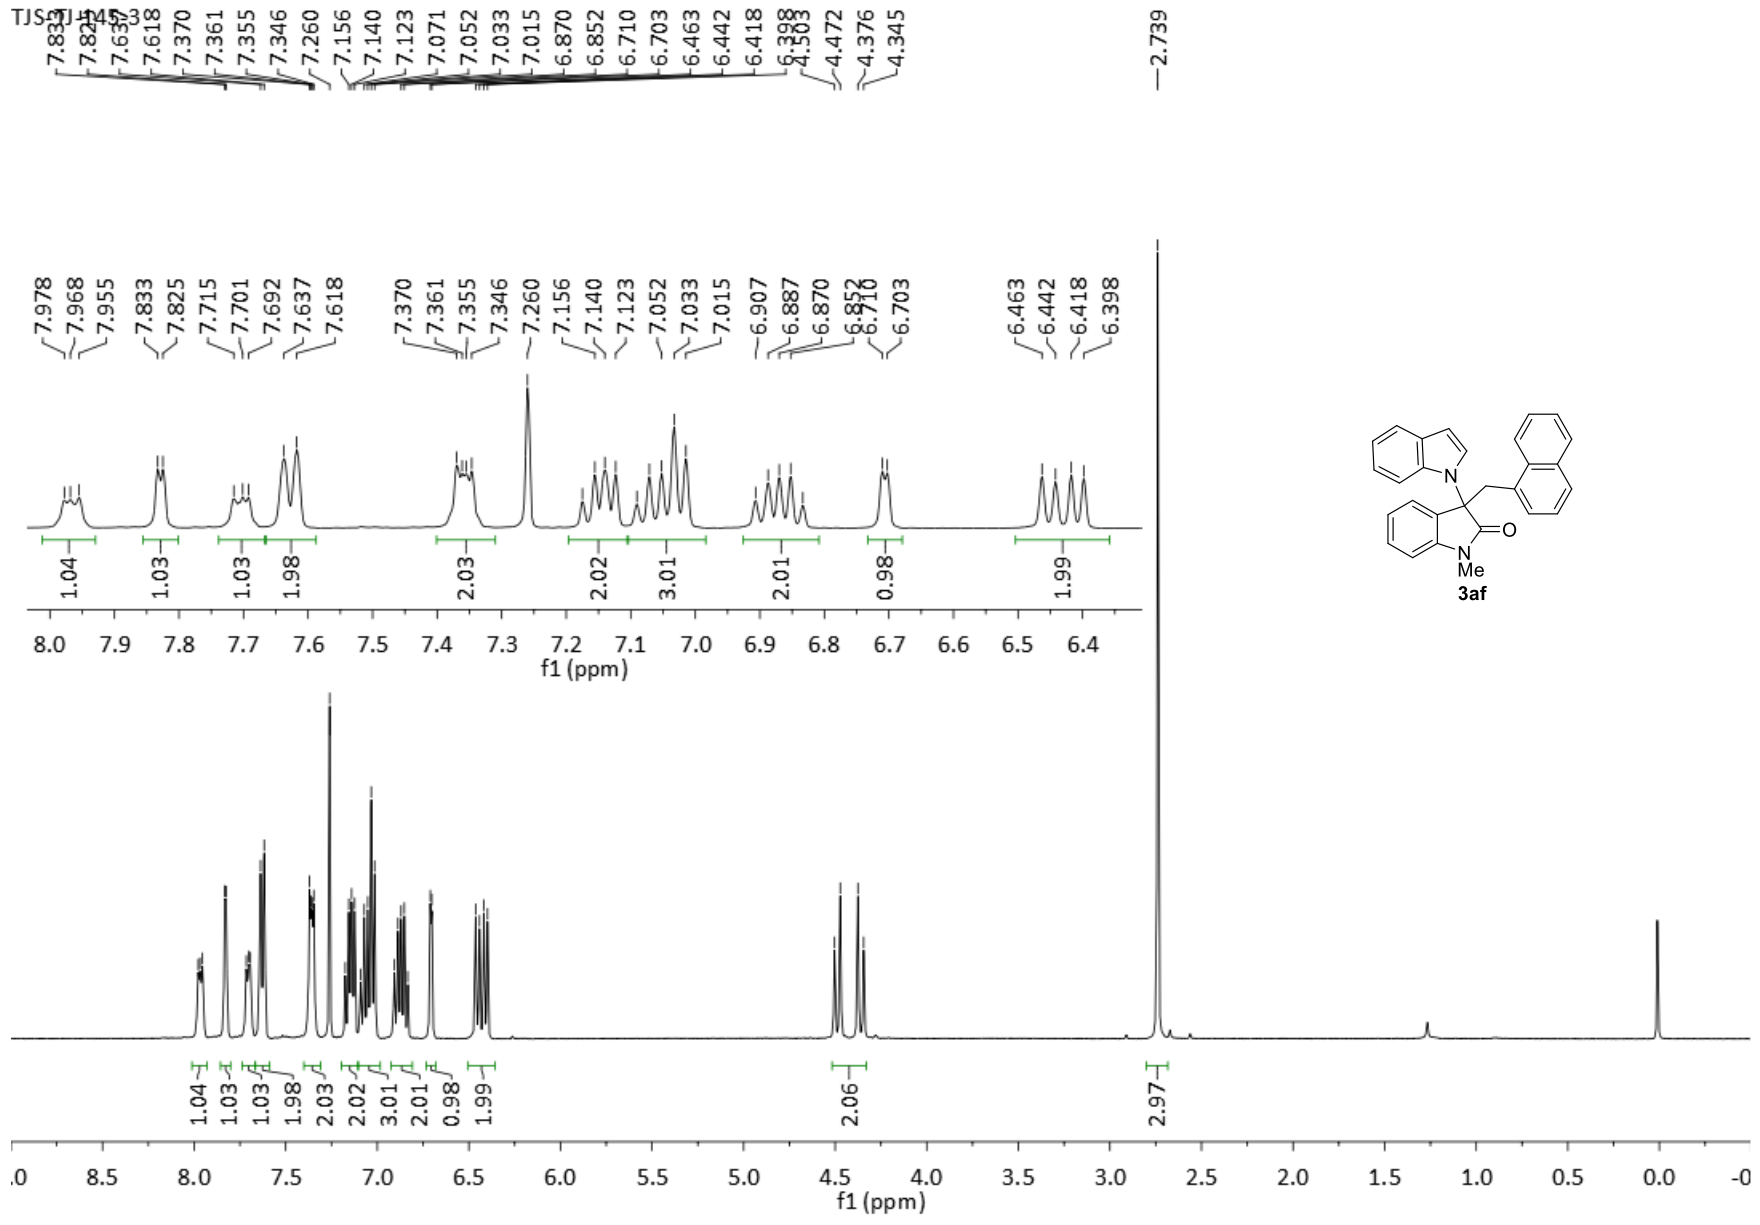

TJS-TJ-145-3

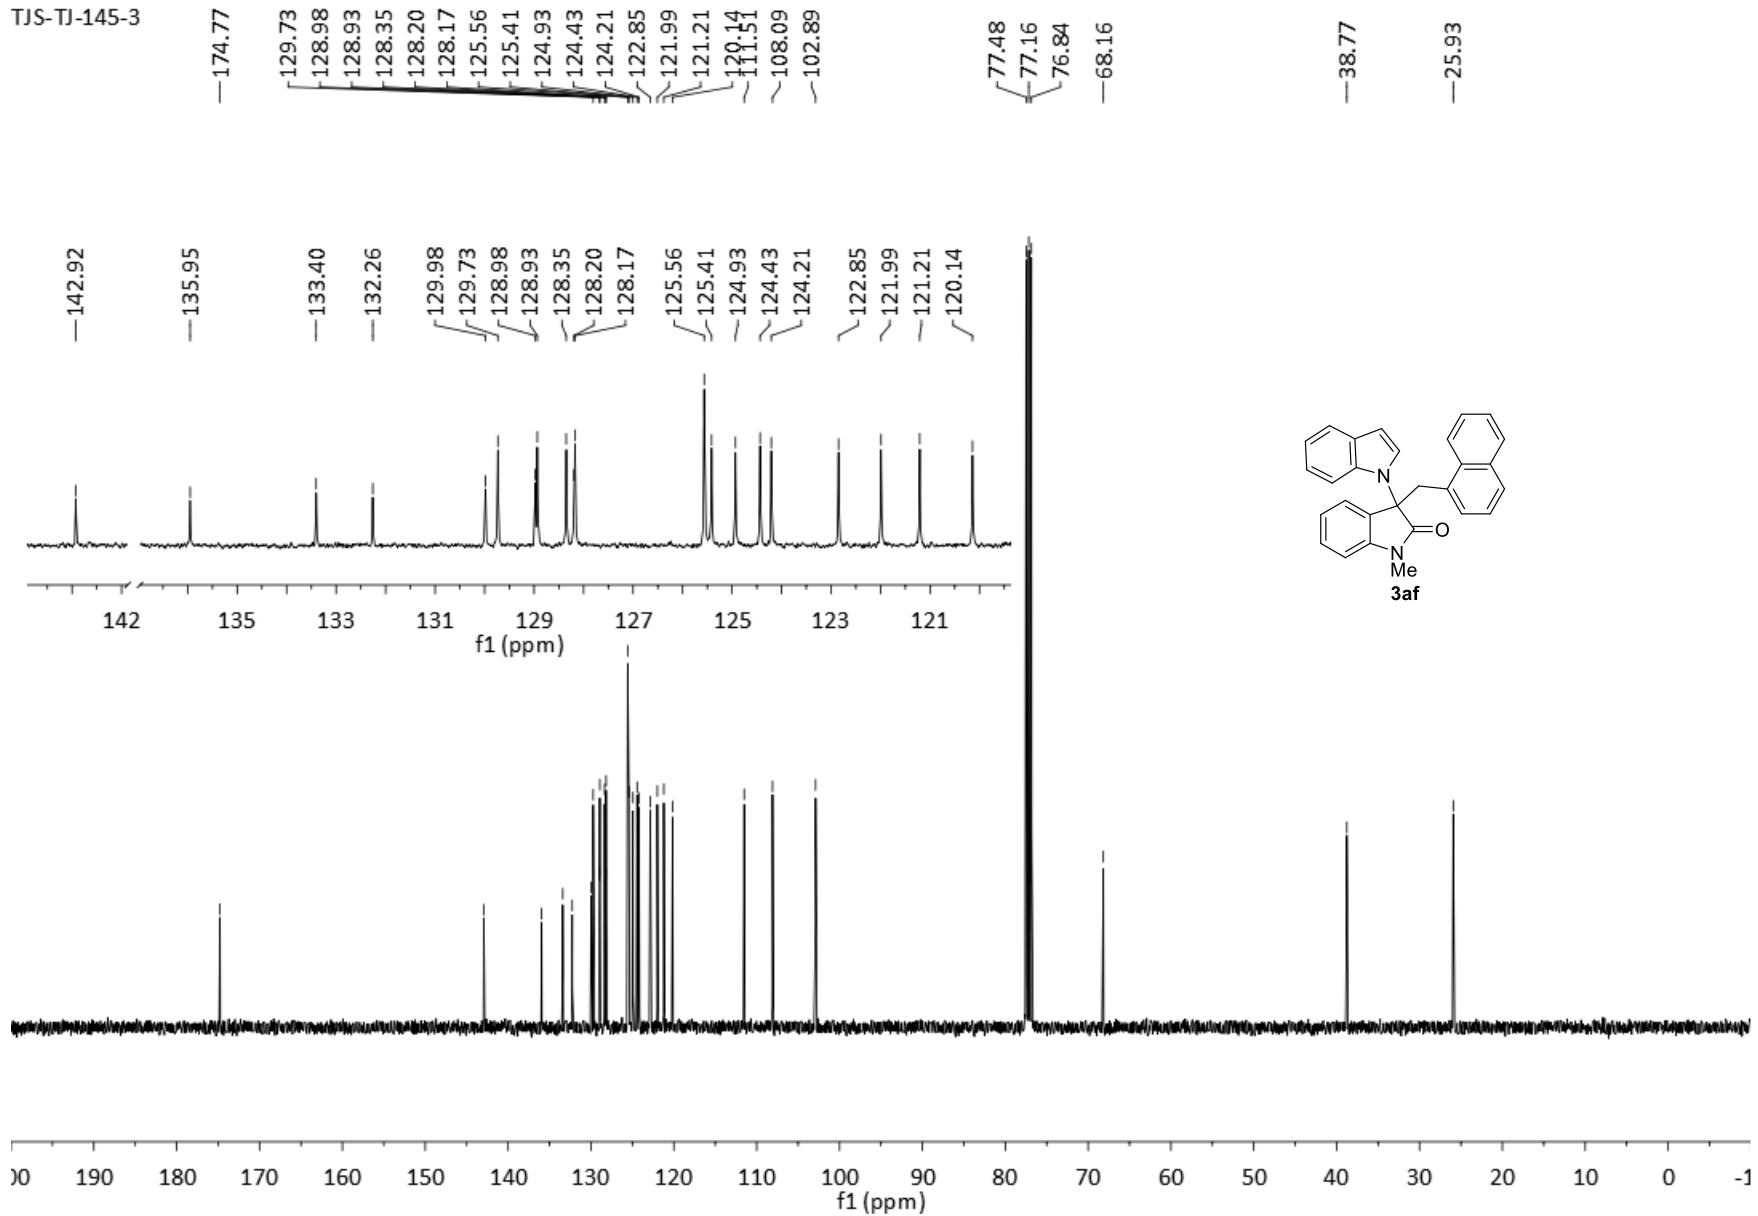

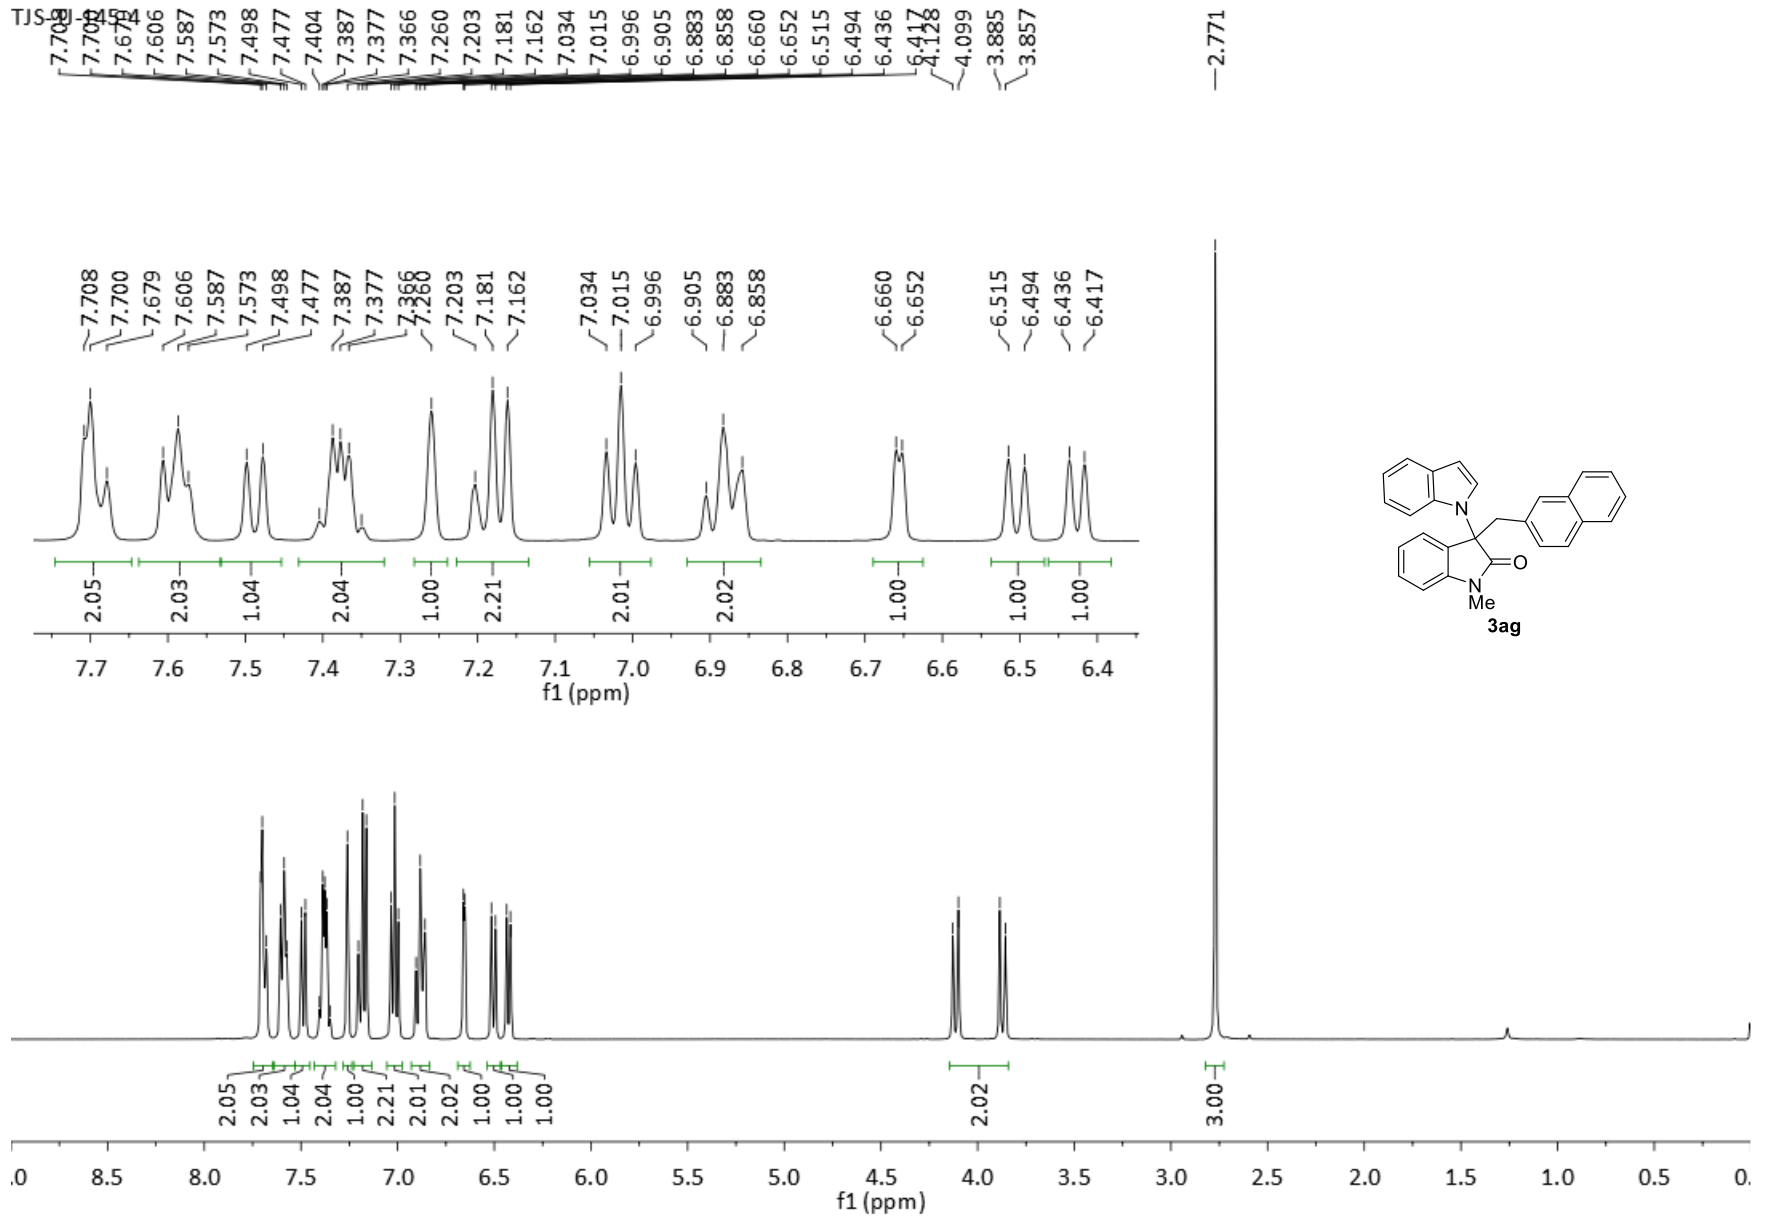

TJS-TJ-145-4

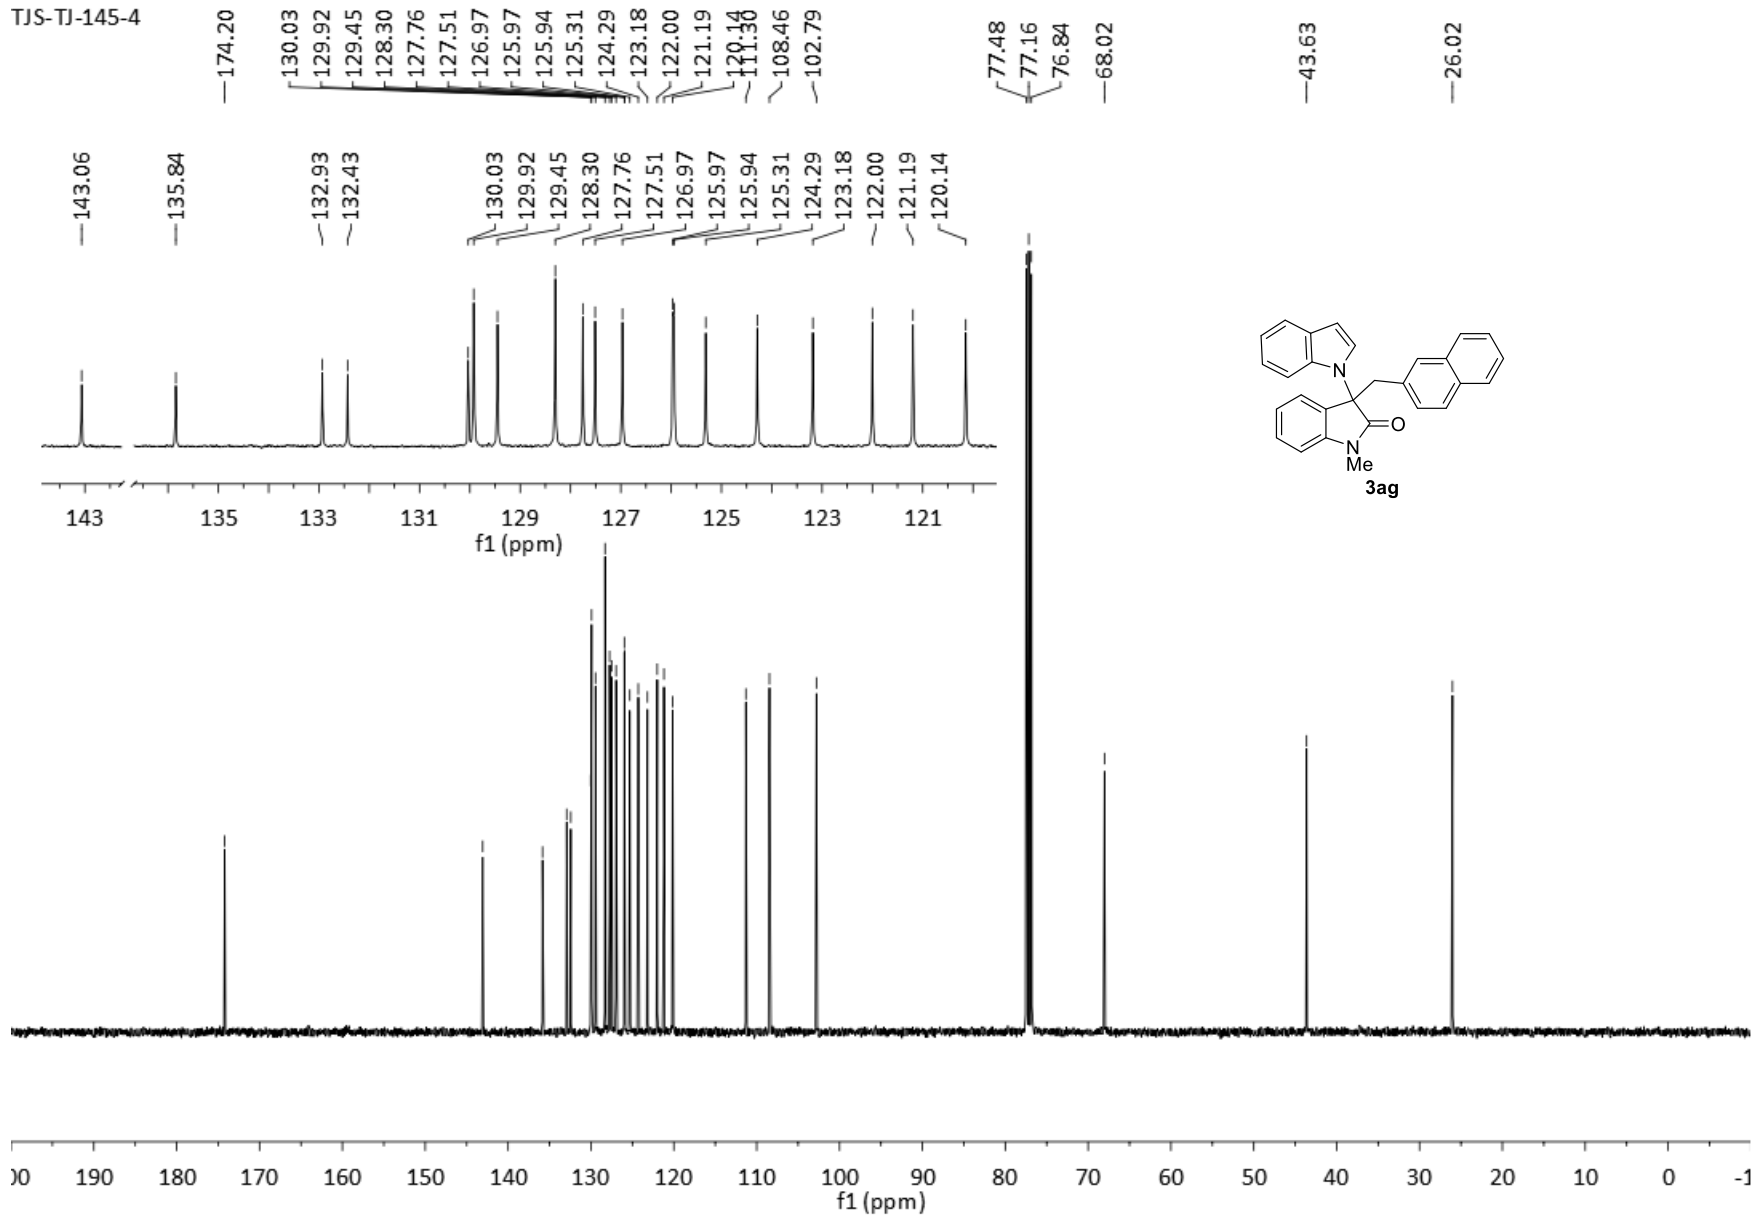

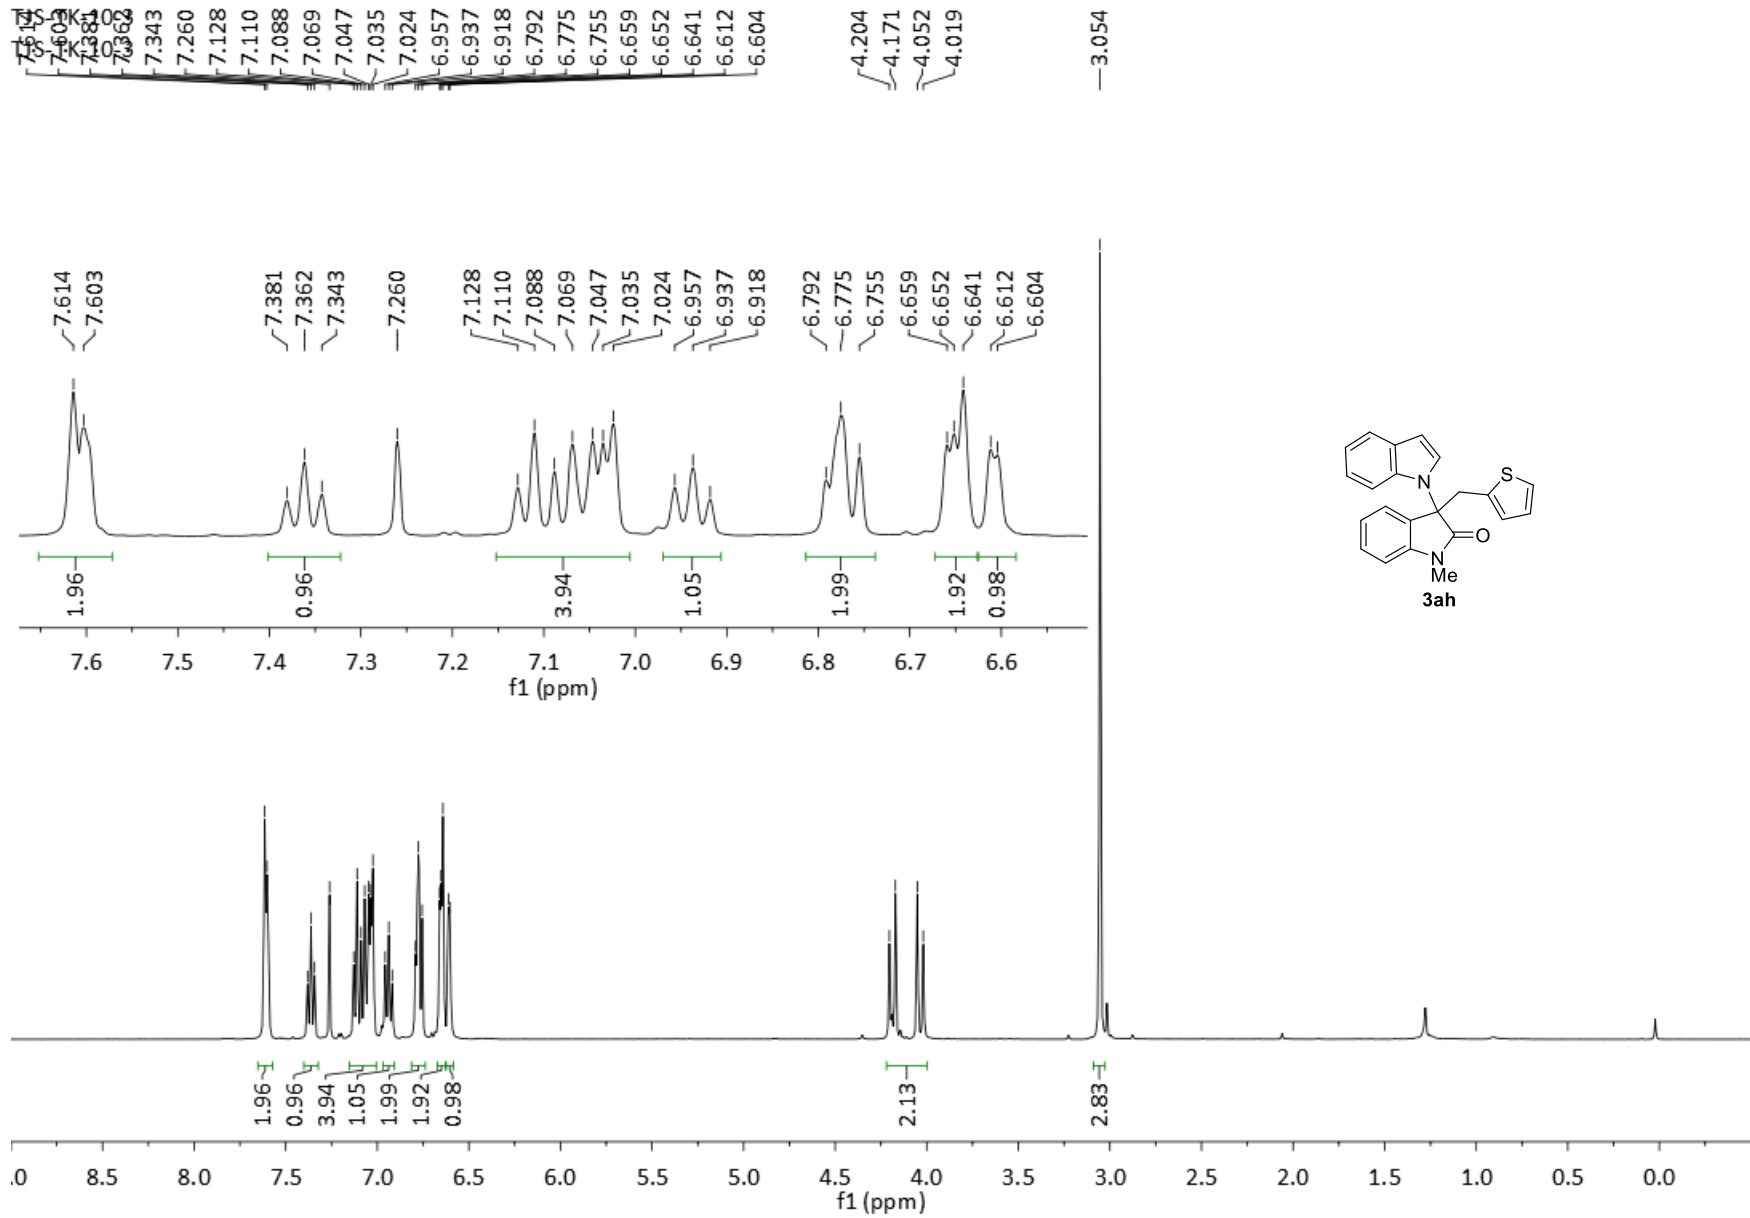

TJS-TK-10-3

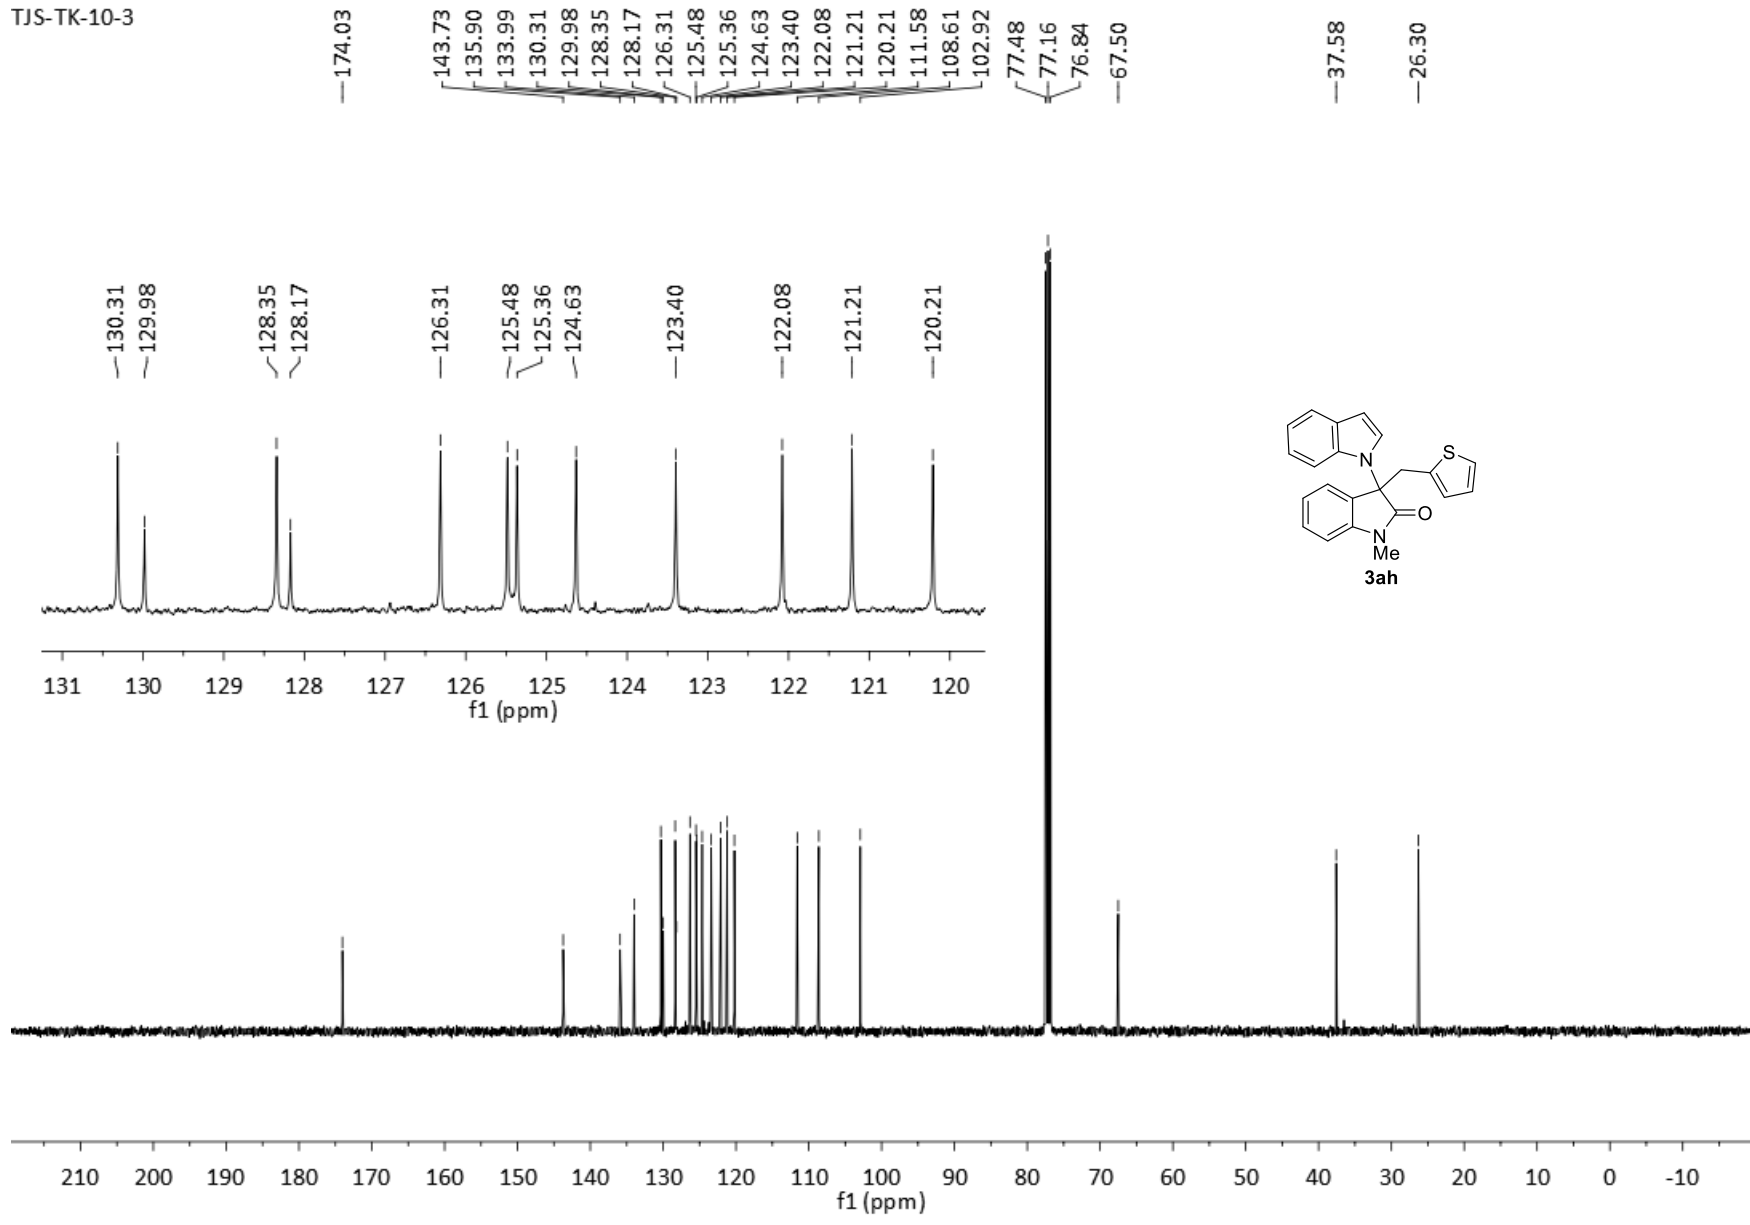



TJS-TK-10

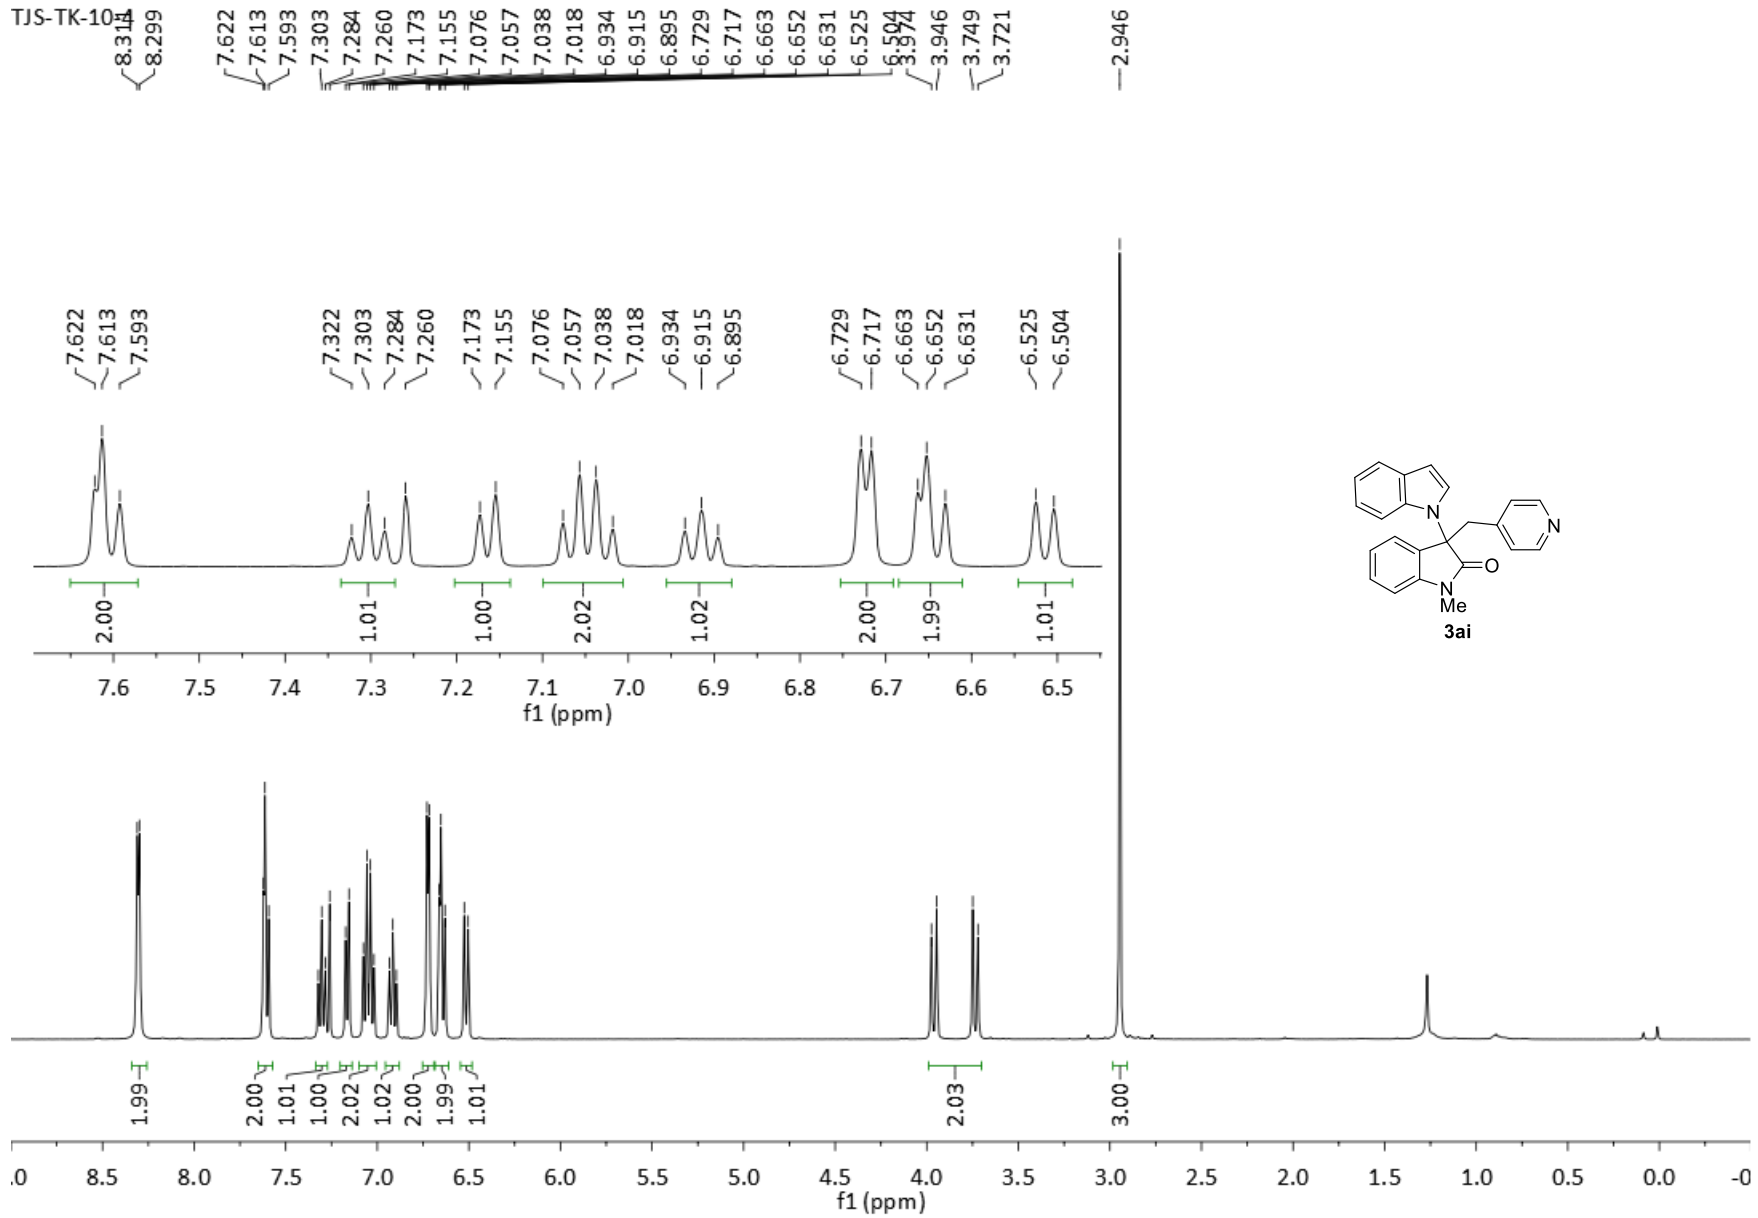

TJS-TK-10-4

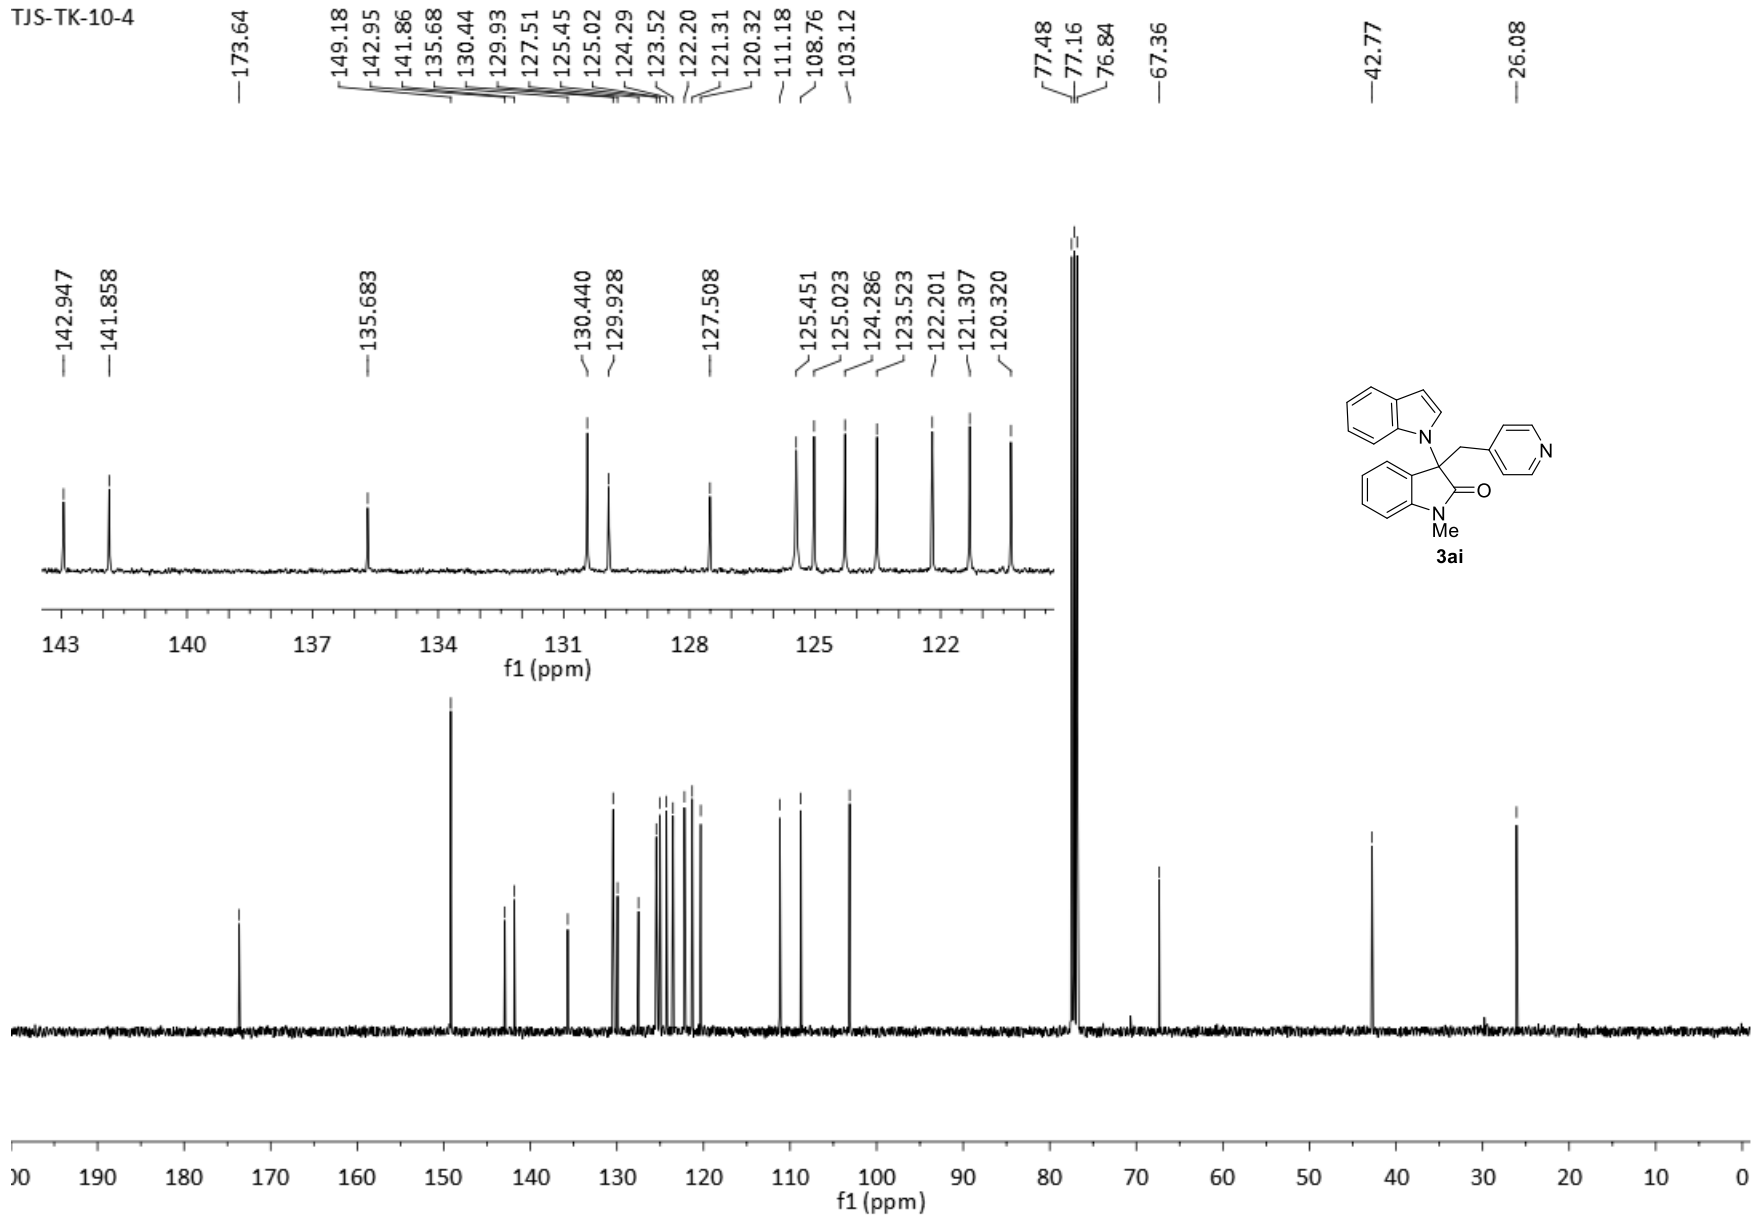

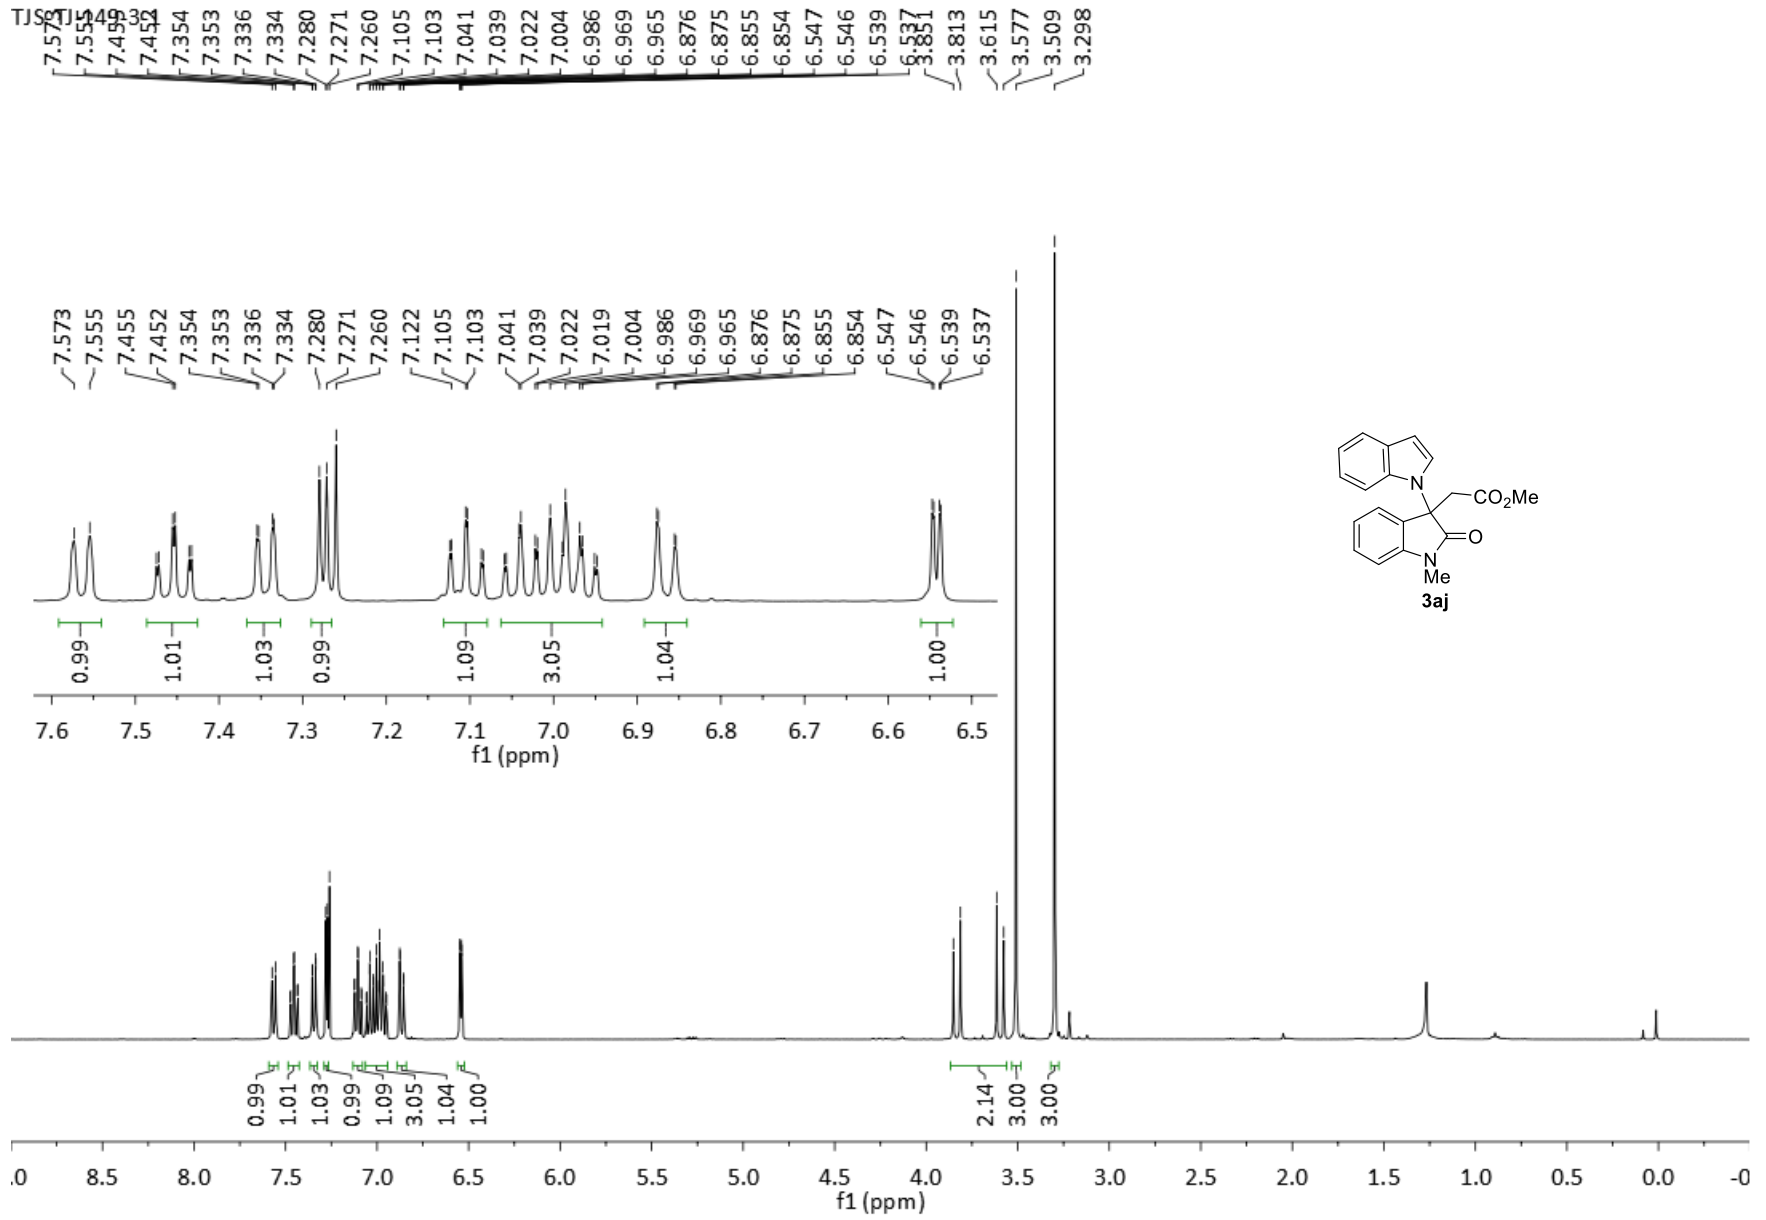

TJS-TJ-149-3-1

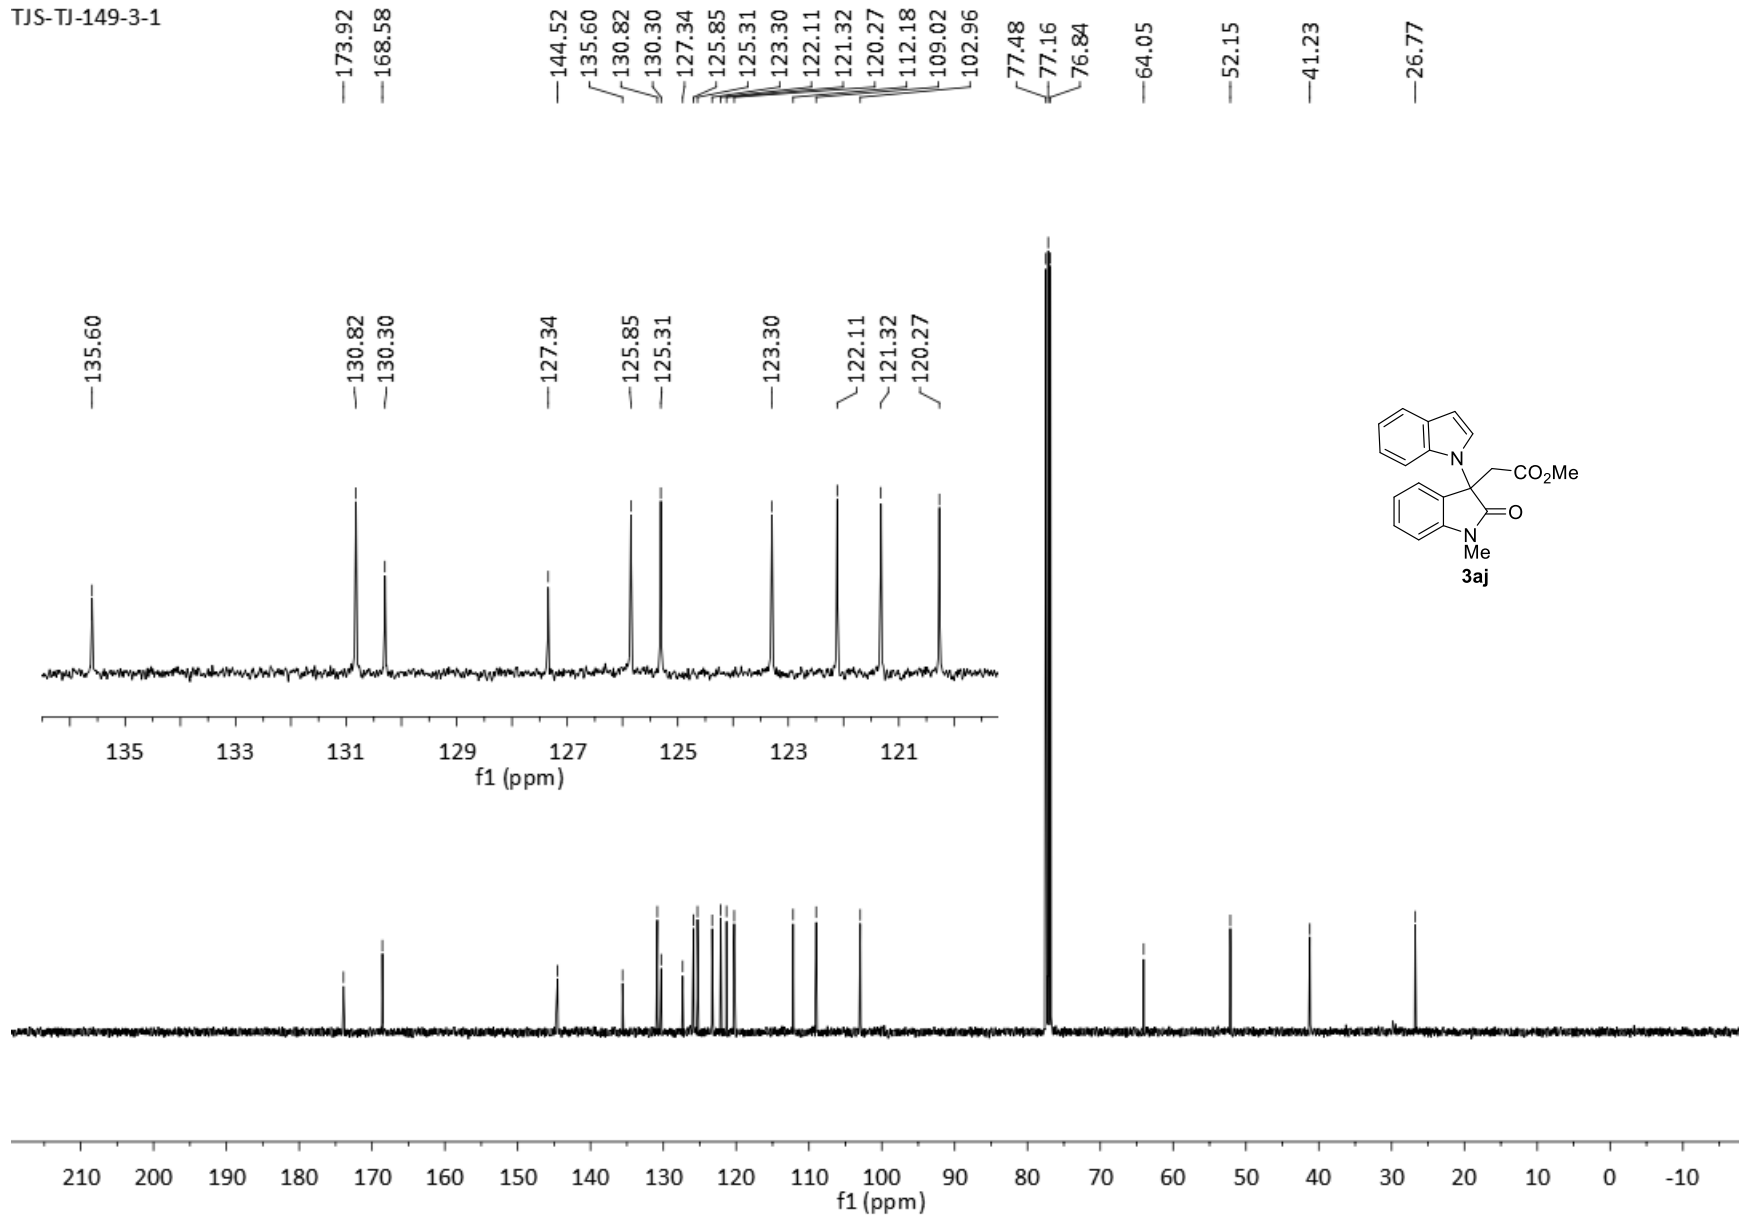

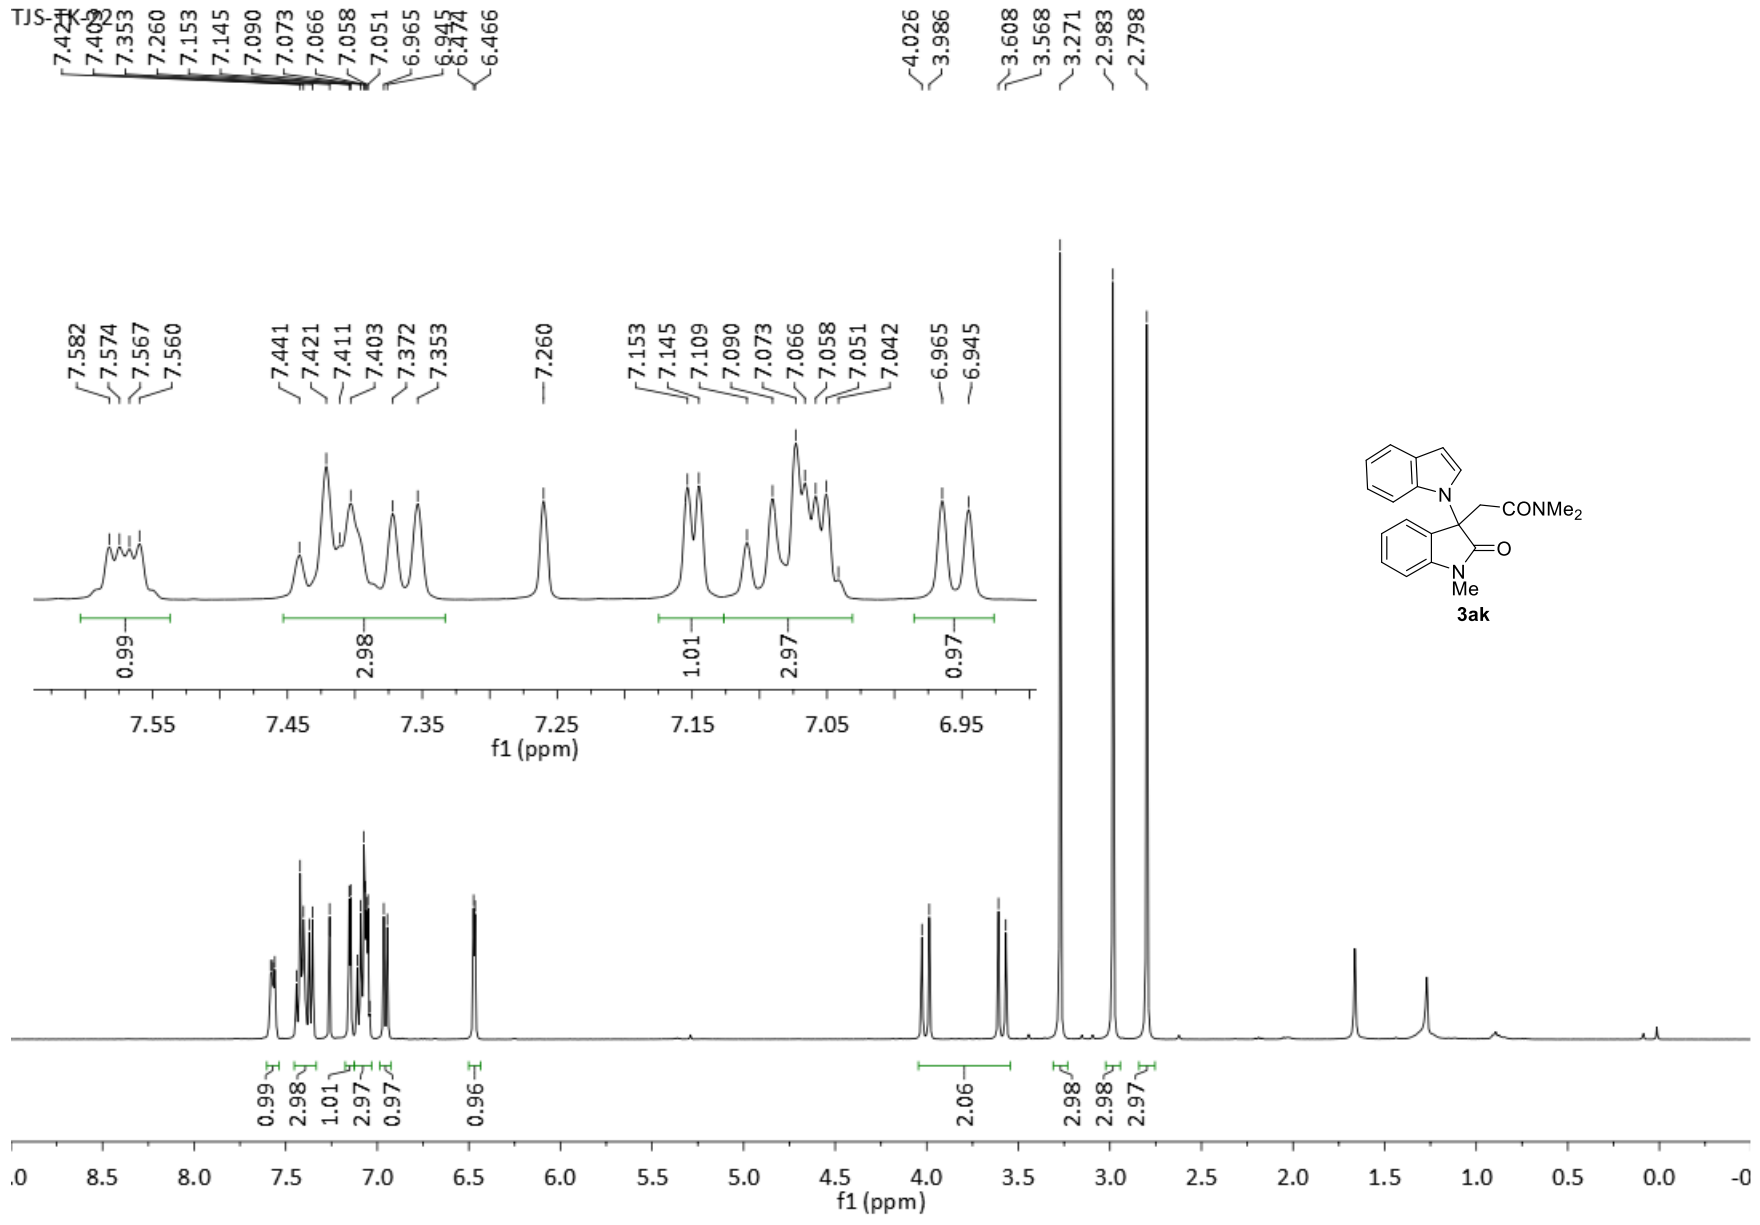

TJS-TK-22

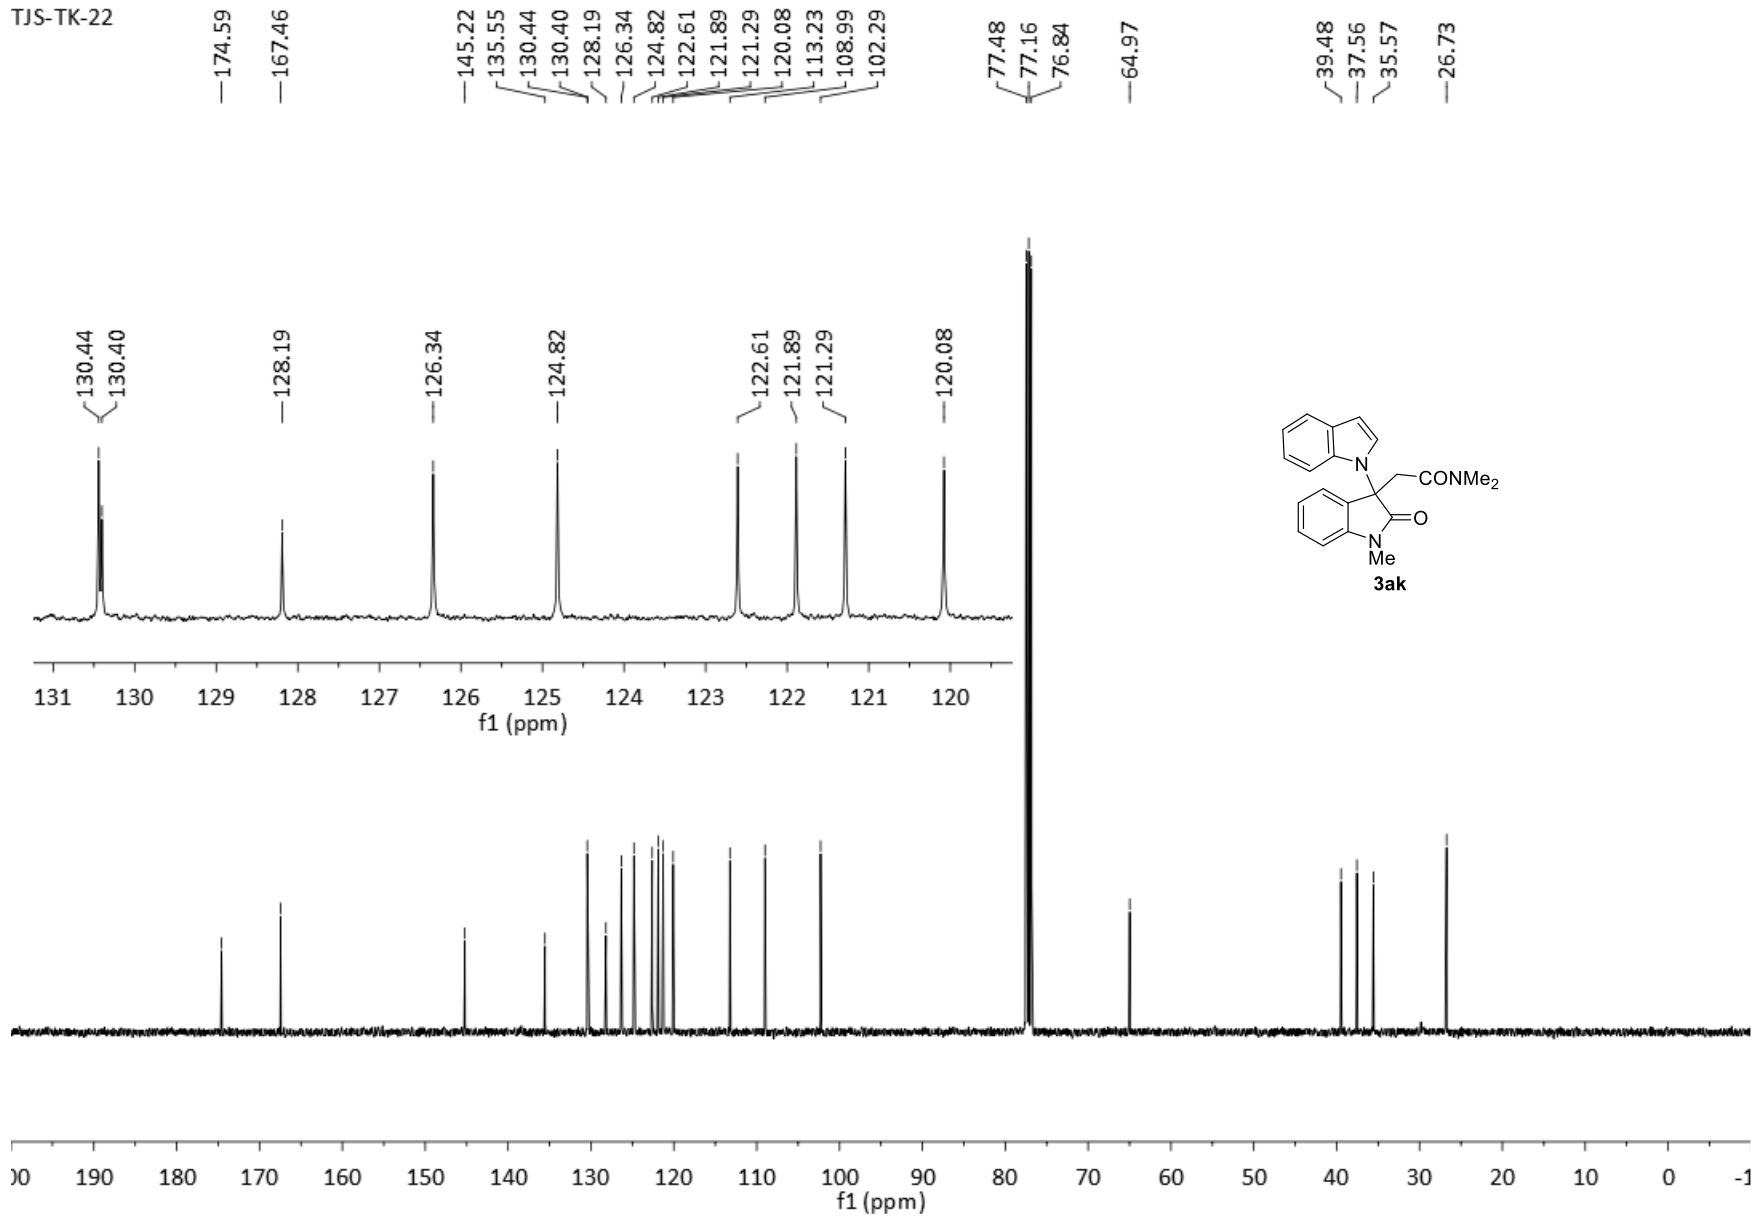

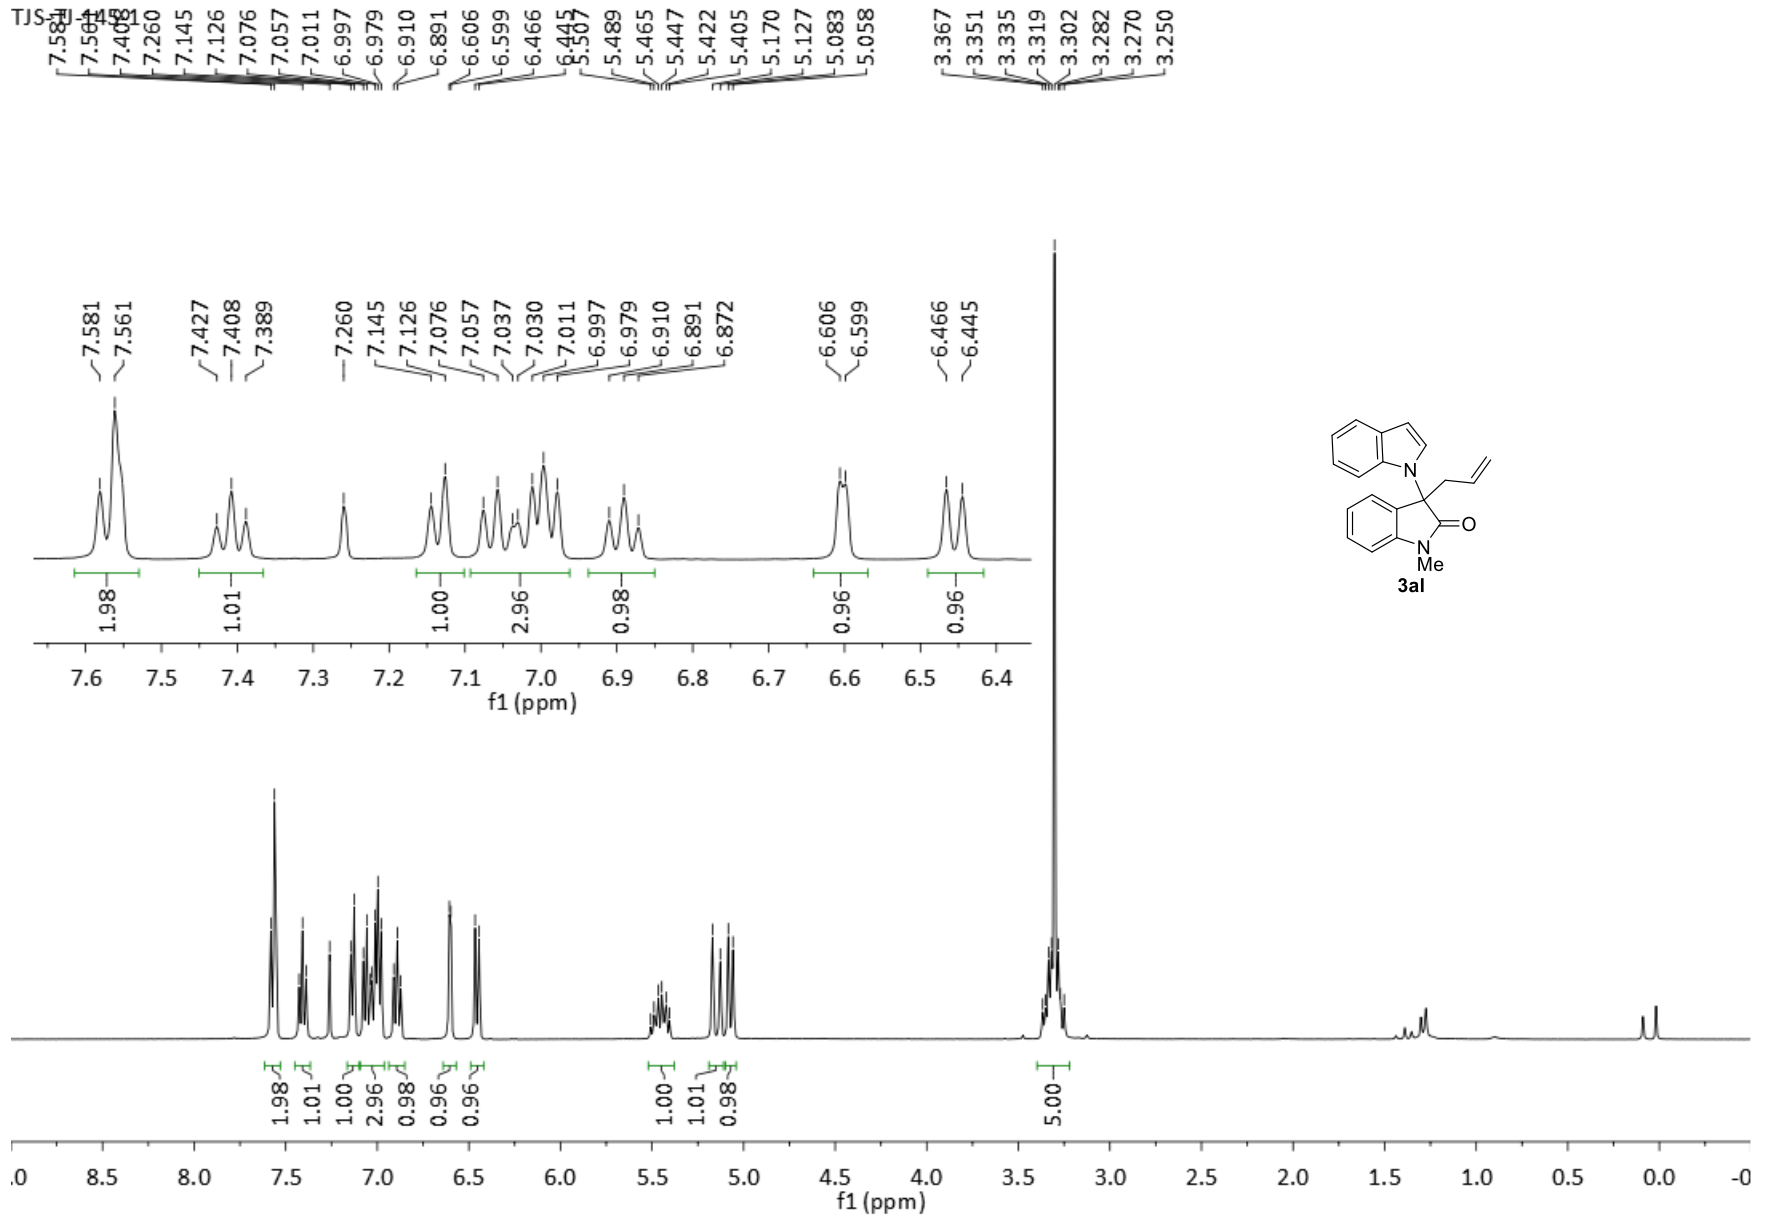

TJS-TJ-145-1

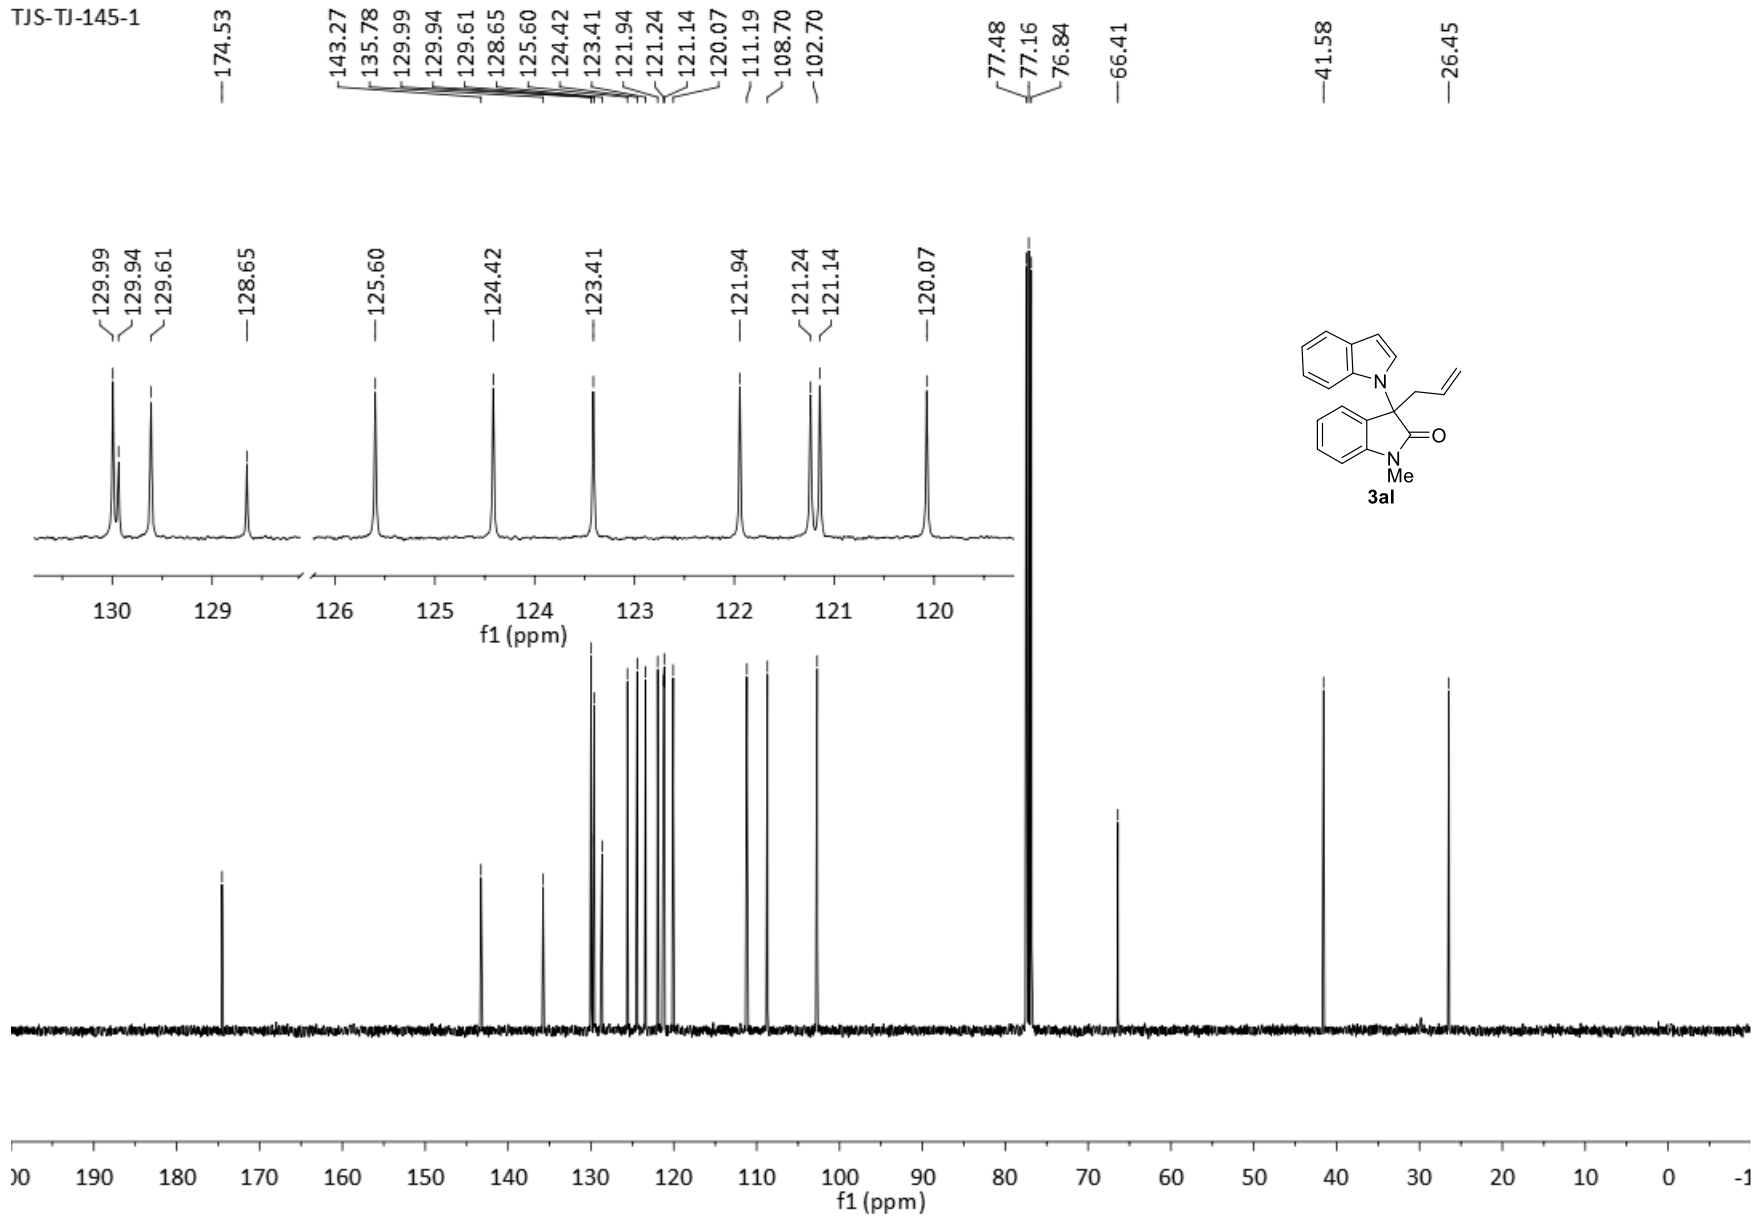



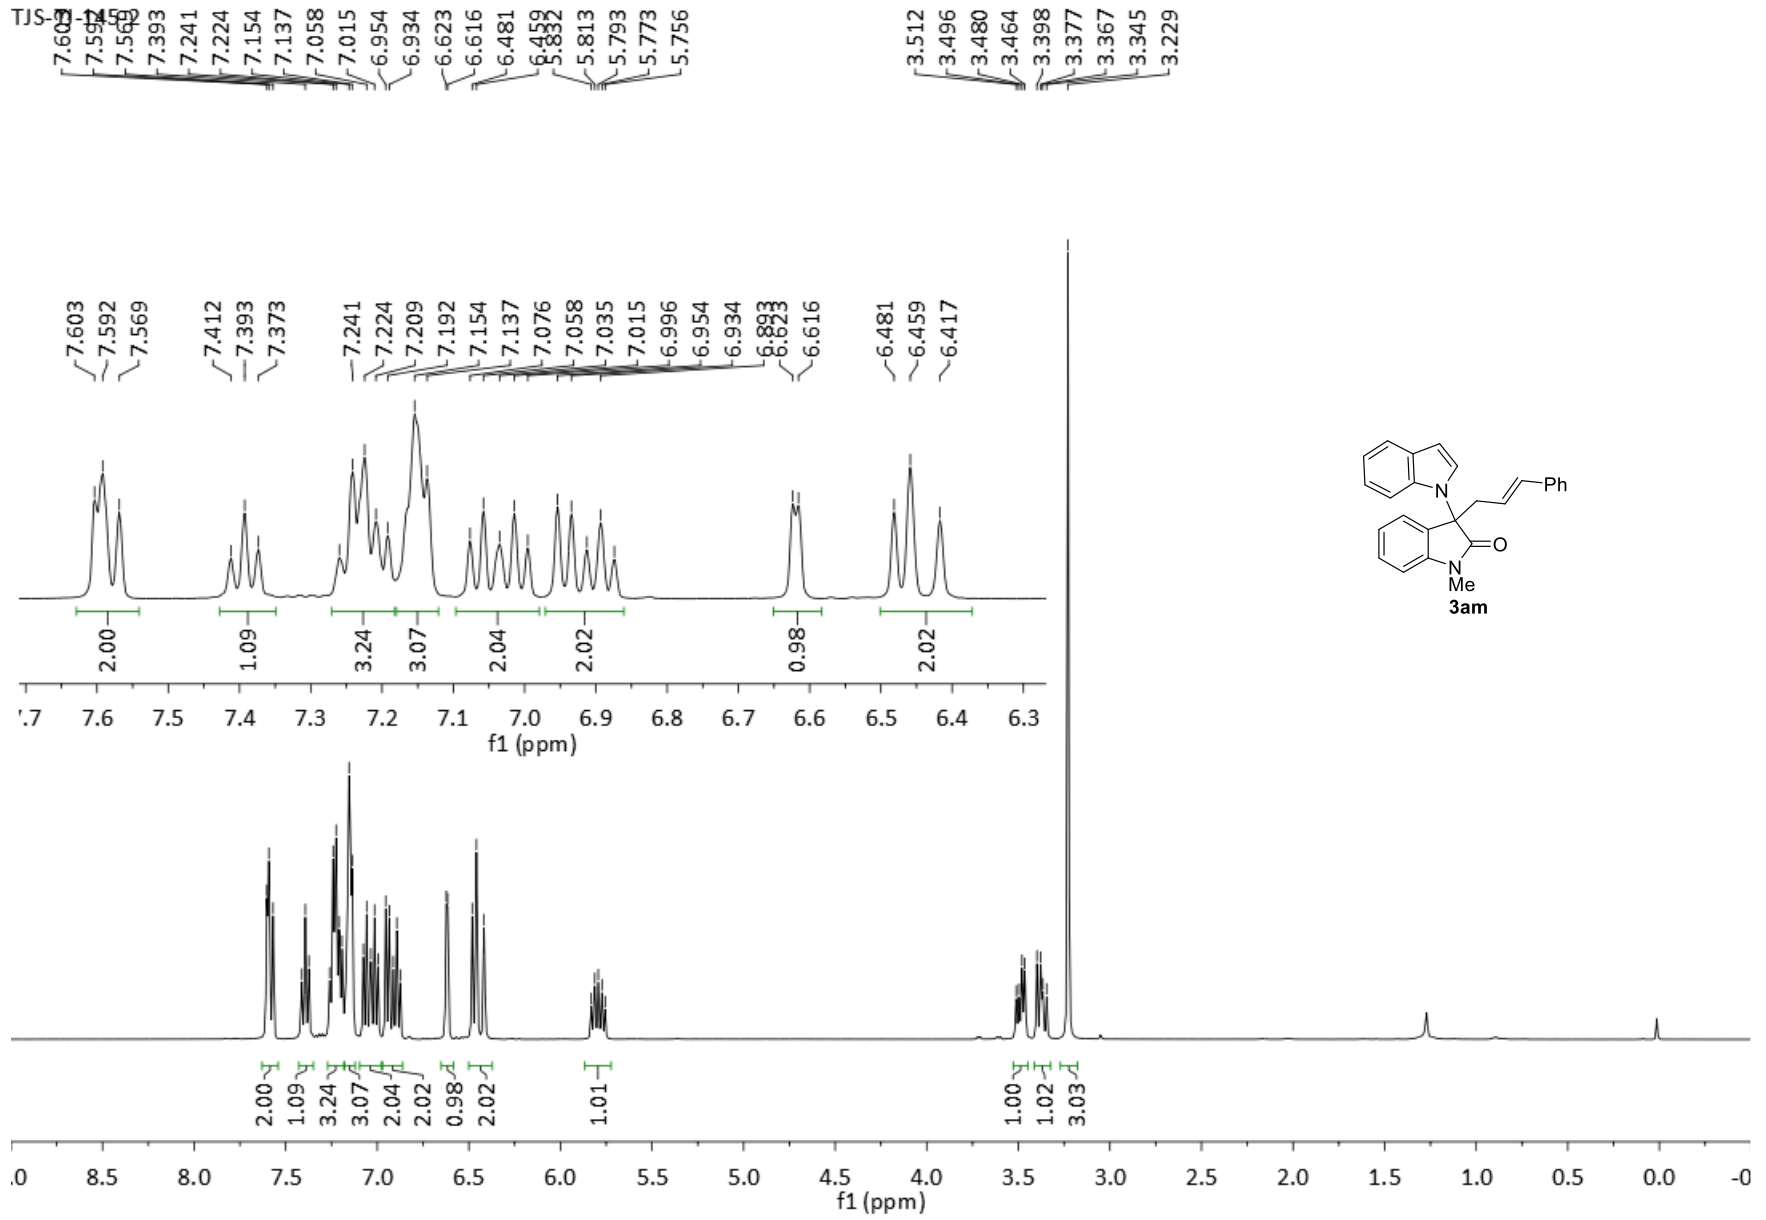

TJS-TJ-145-2

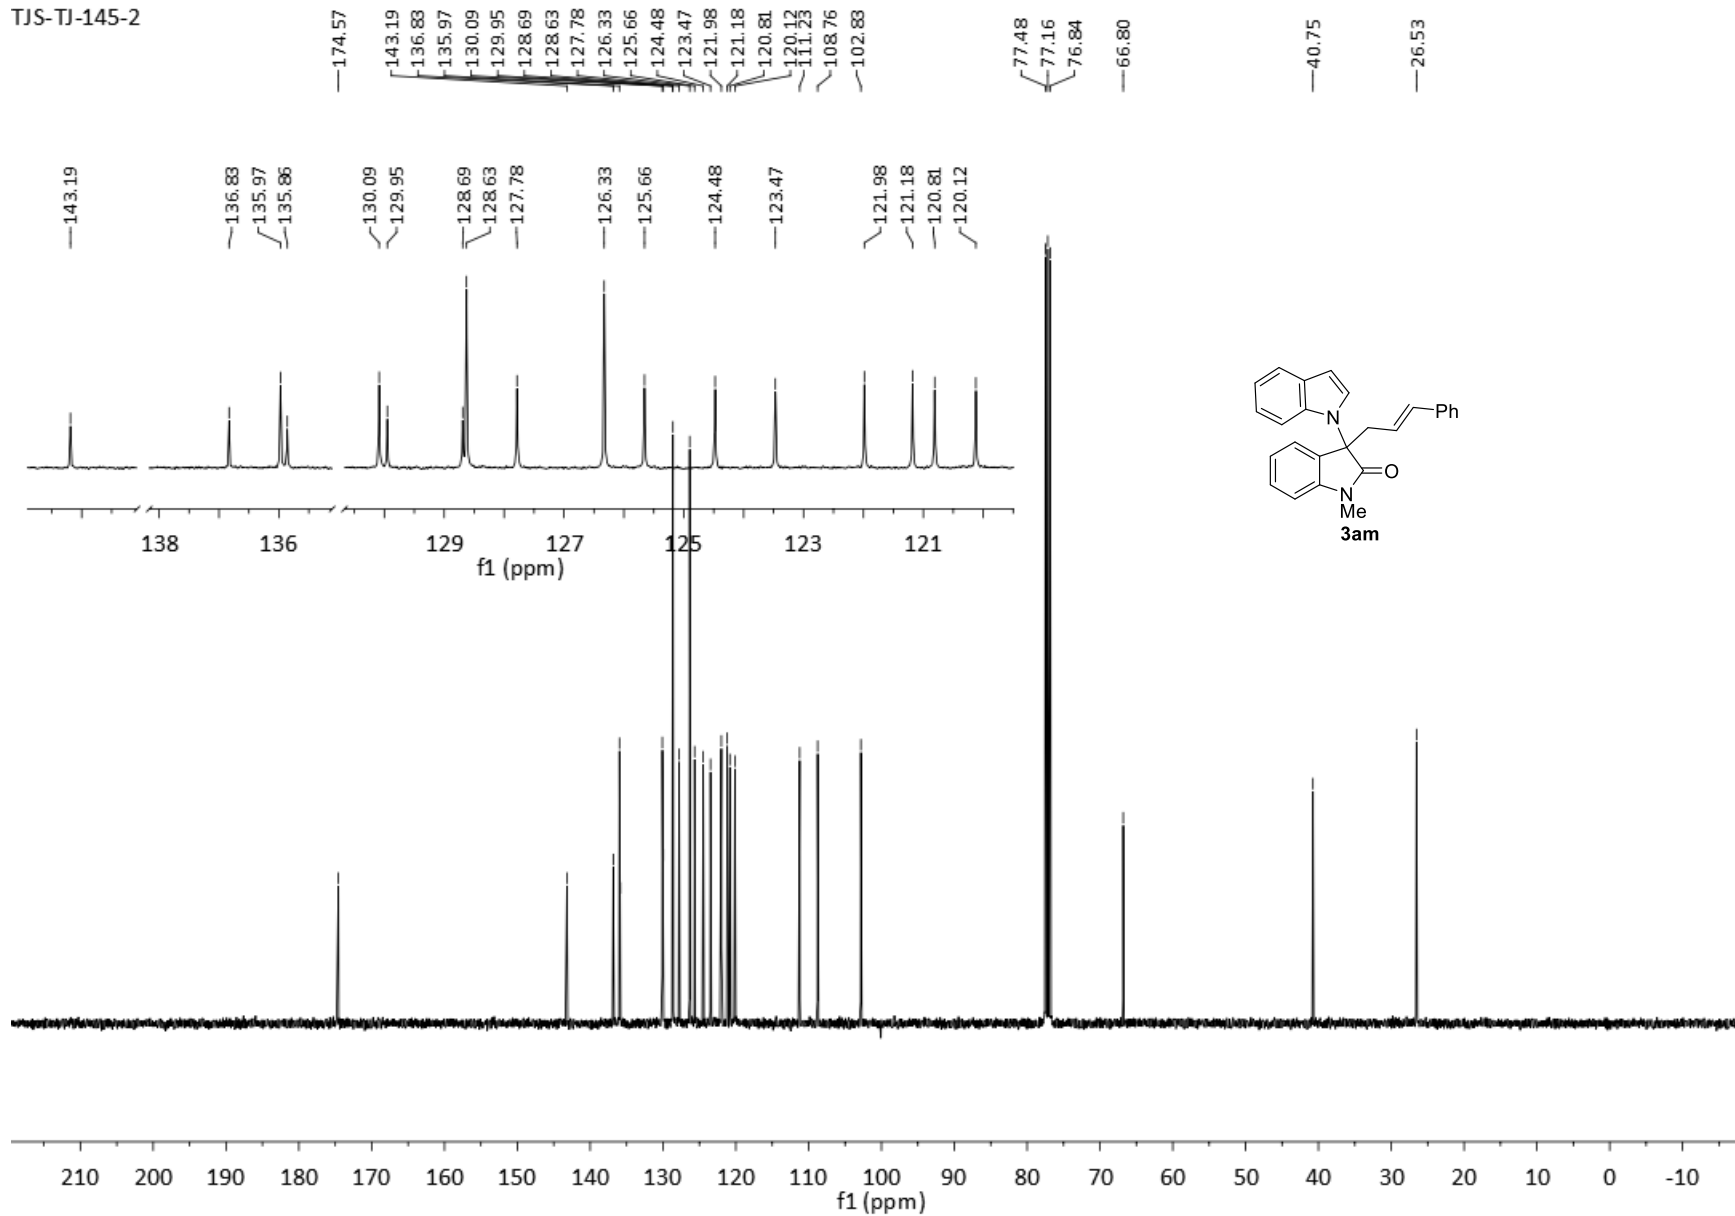

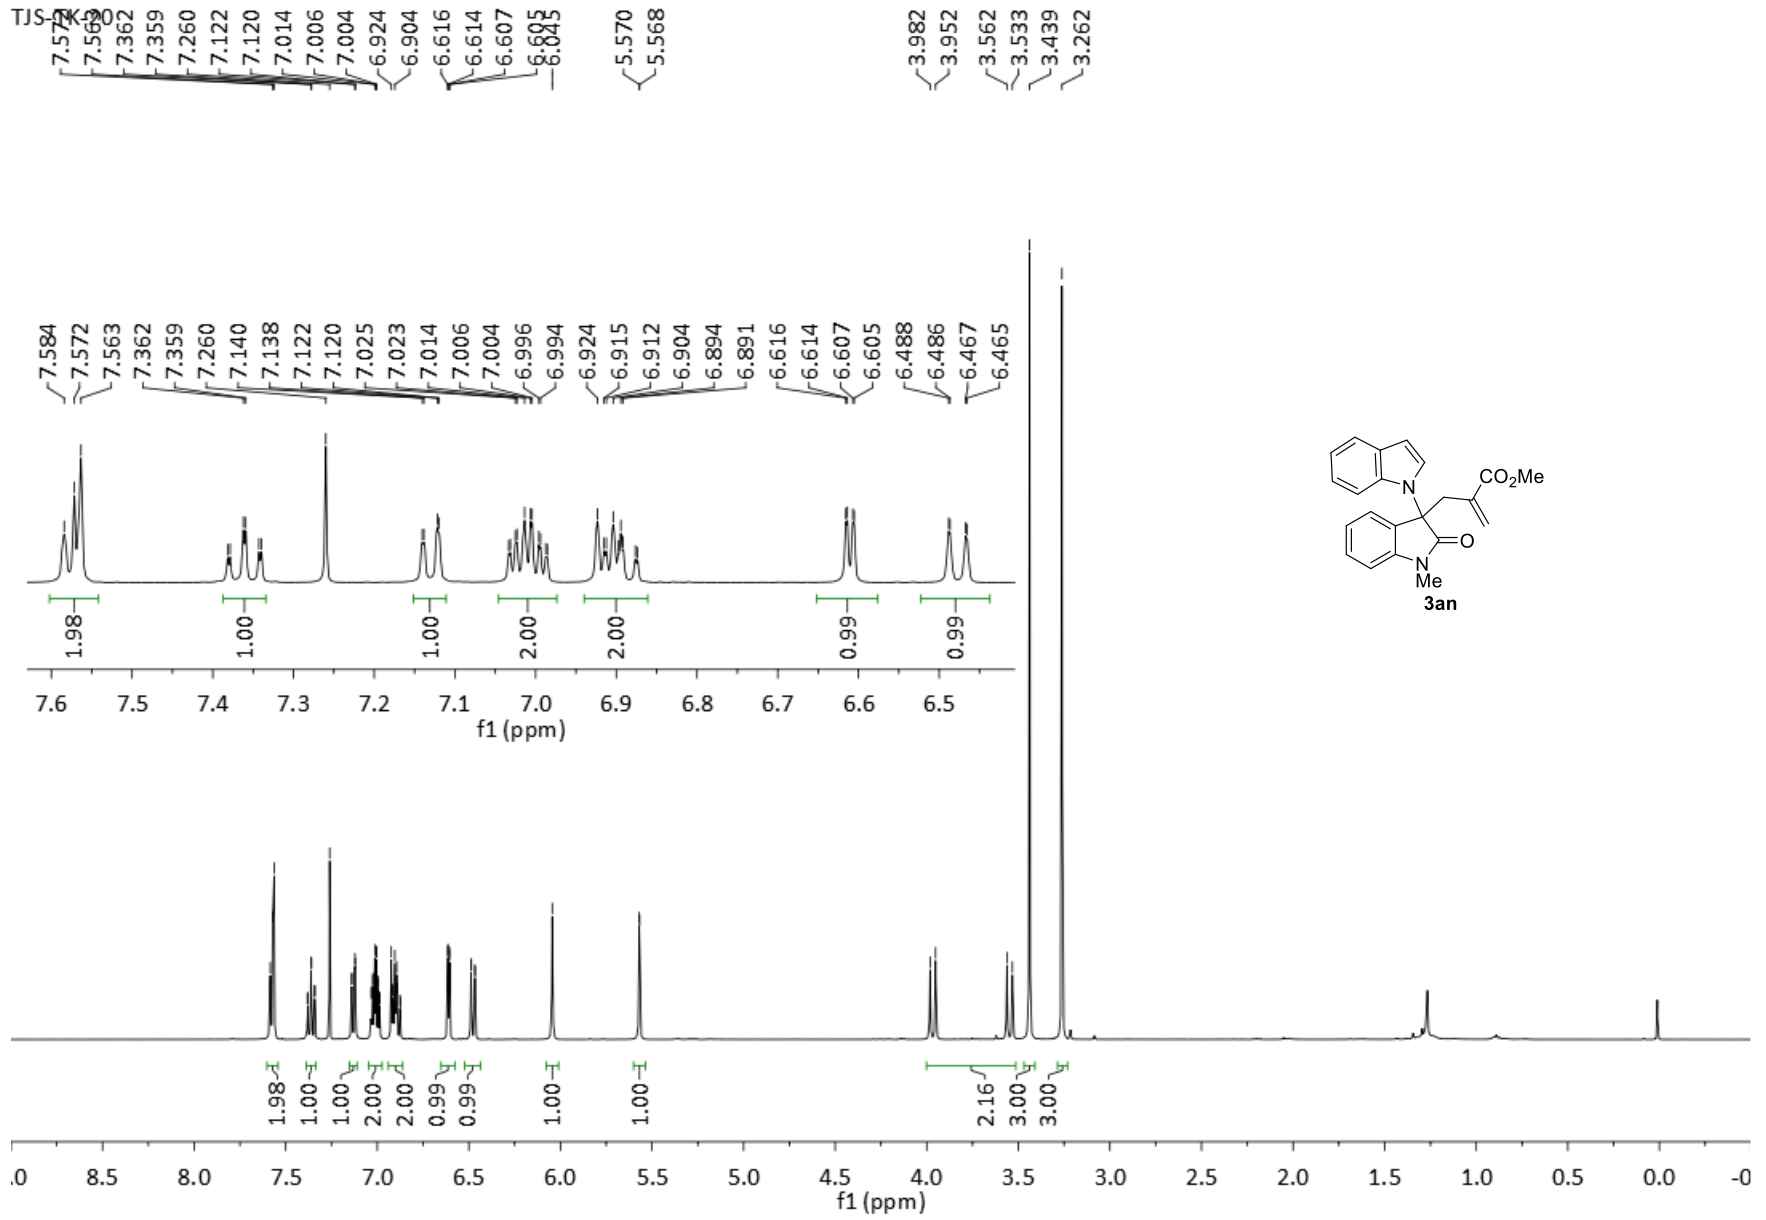

TJS-TK-20

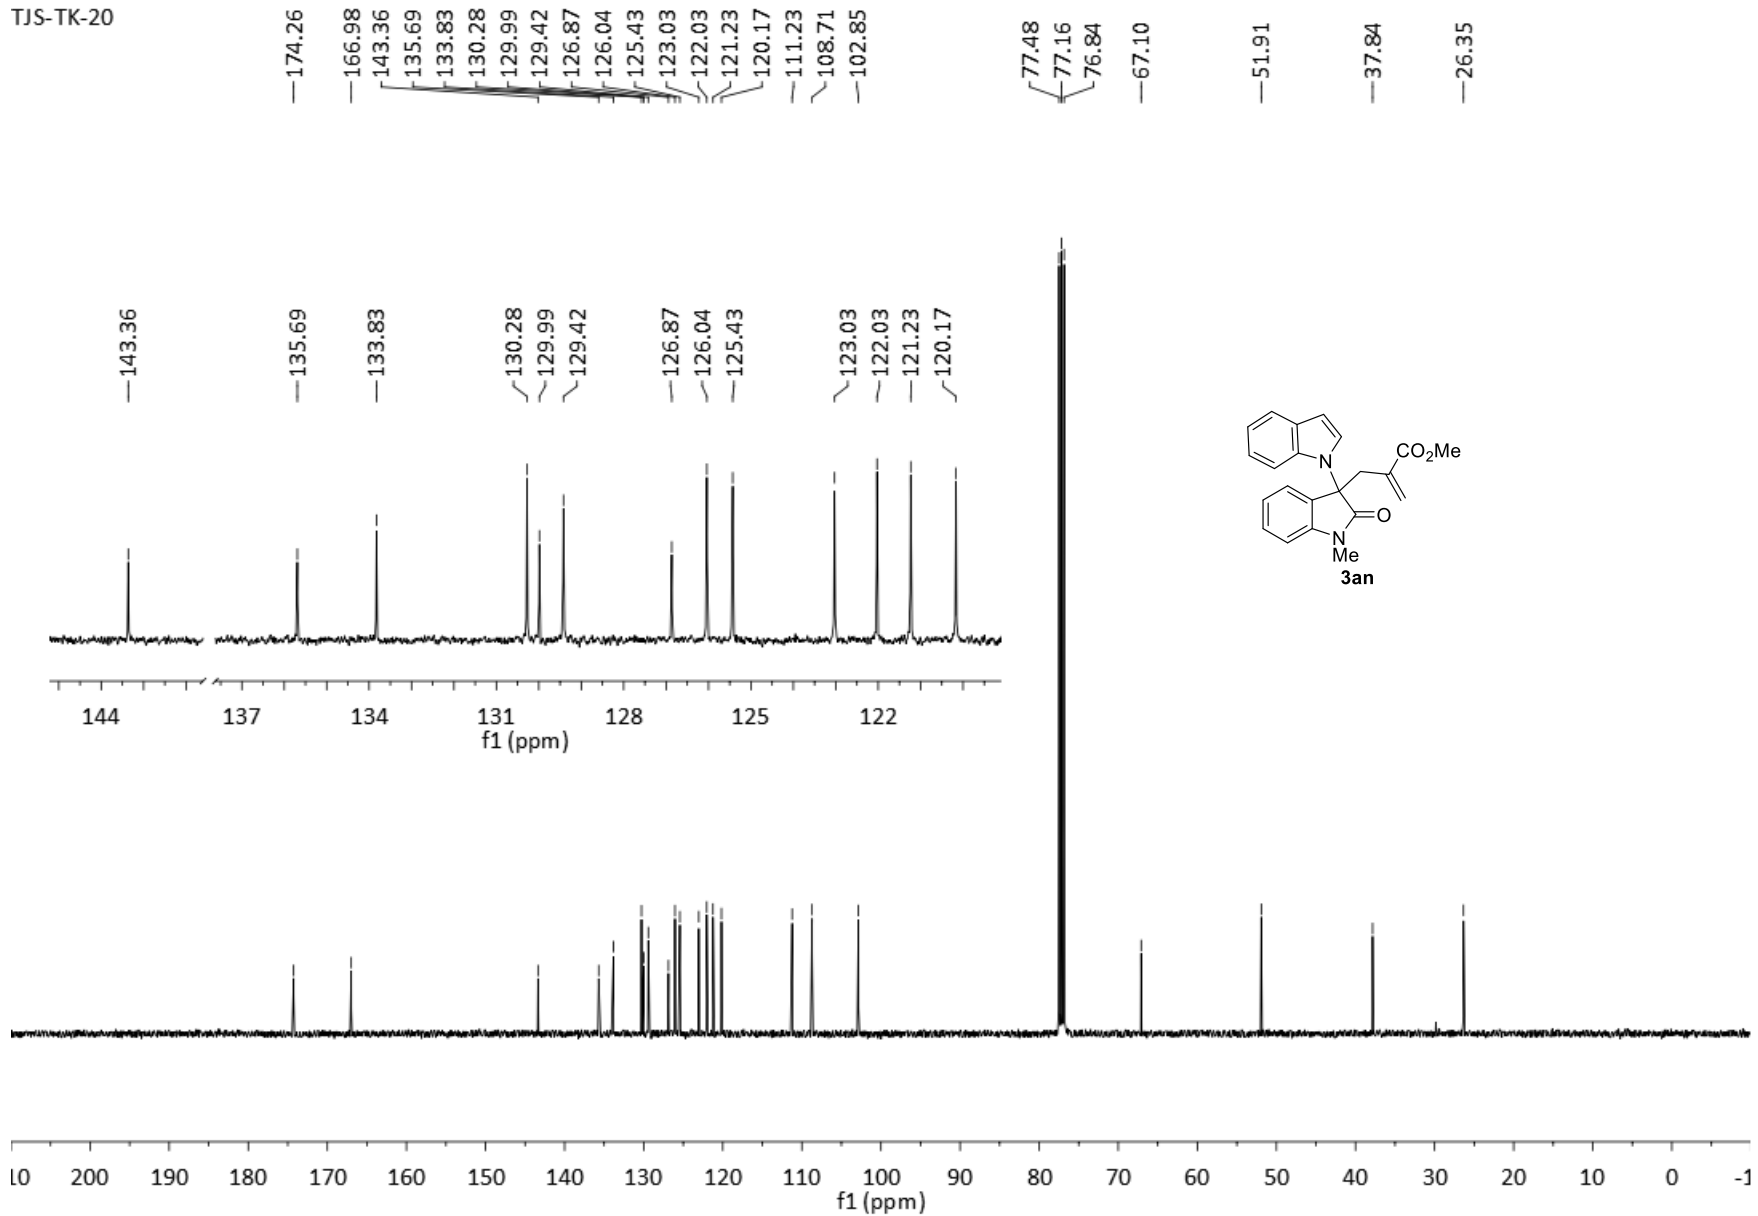

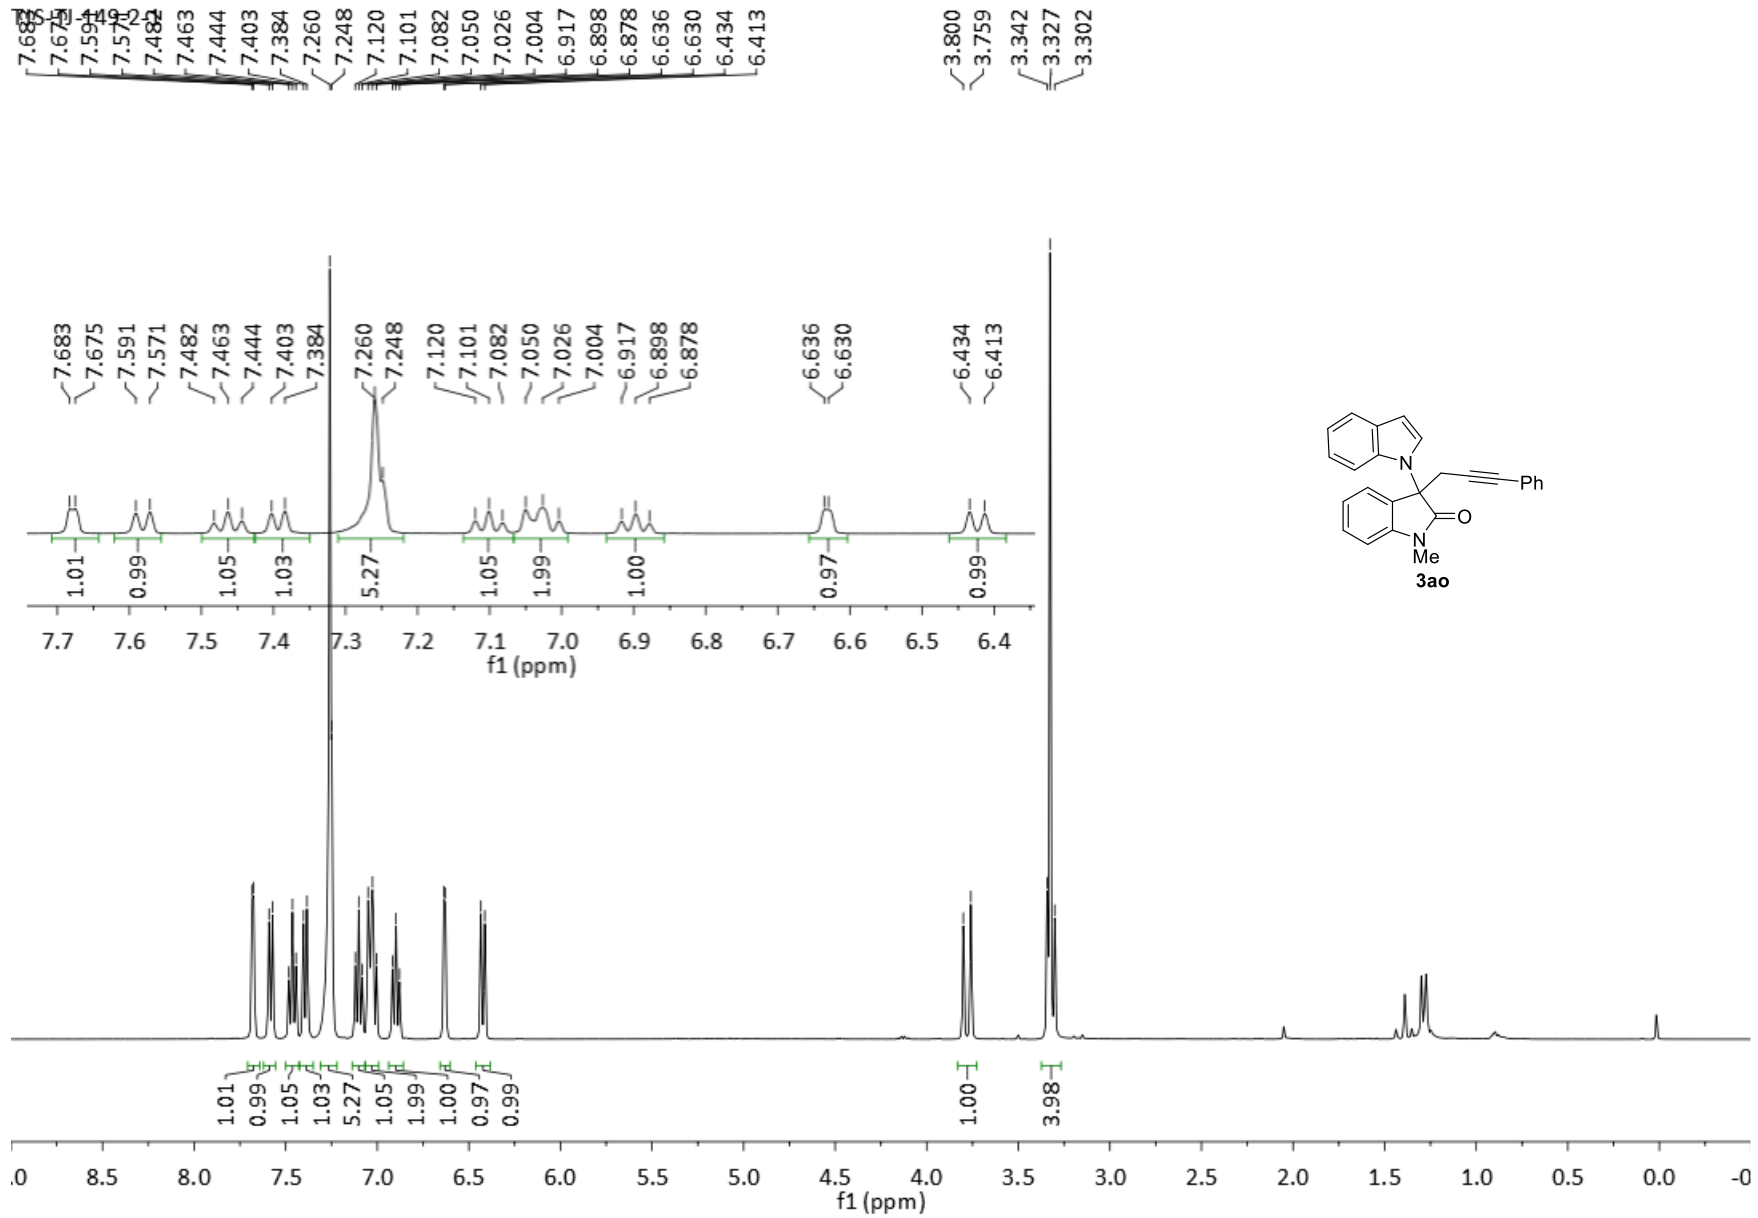

TJS-TJ-149-2-1

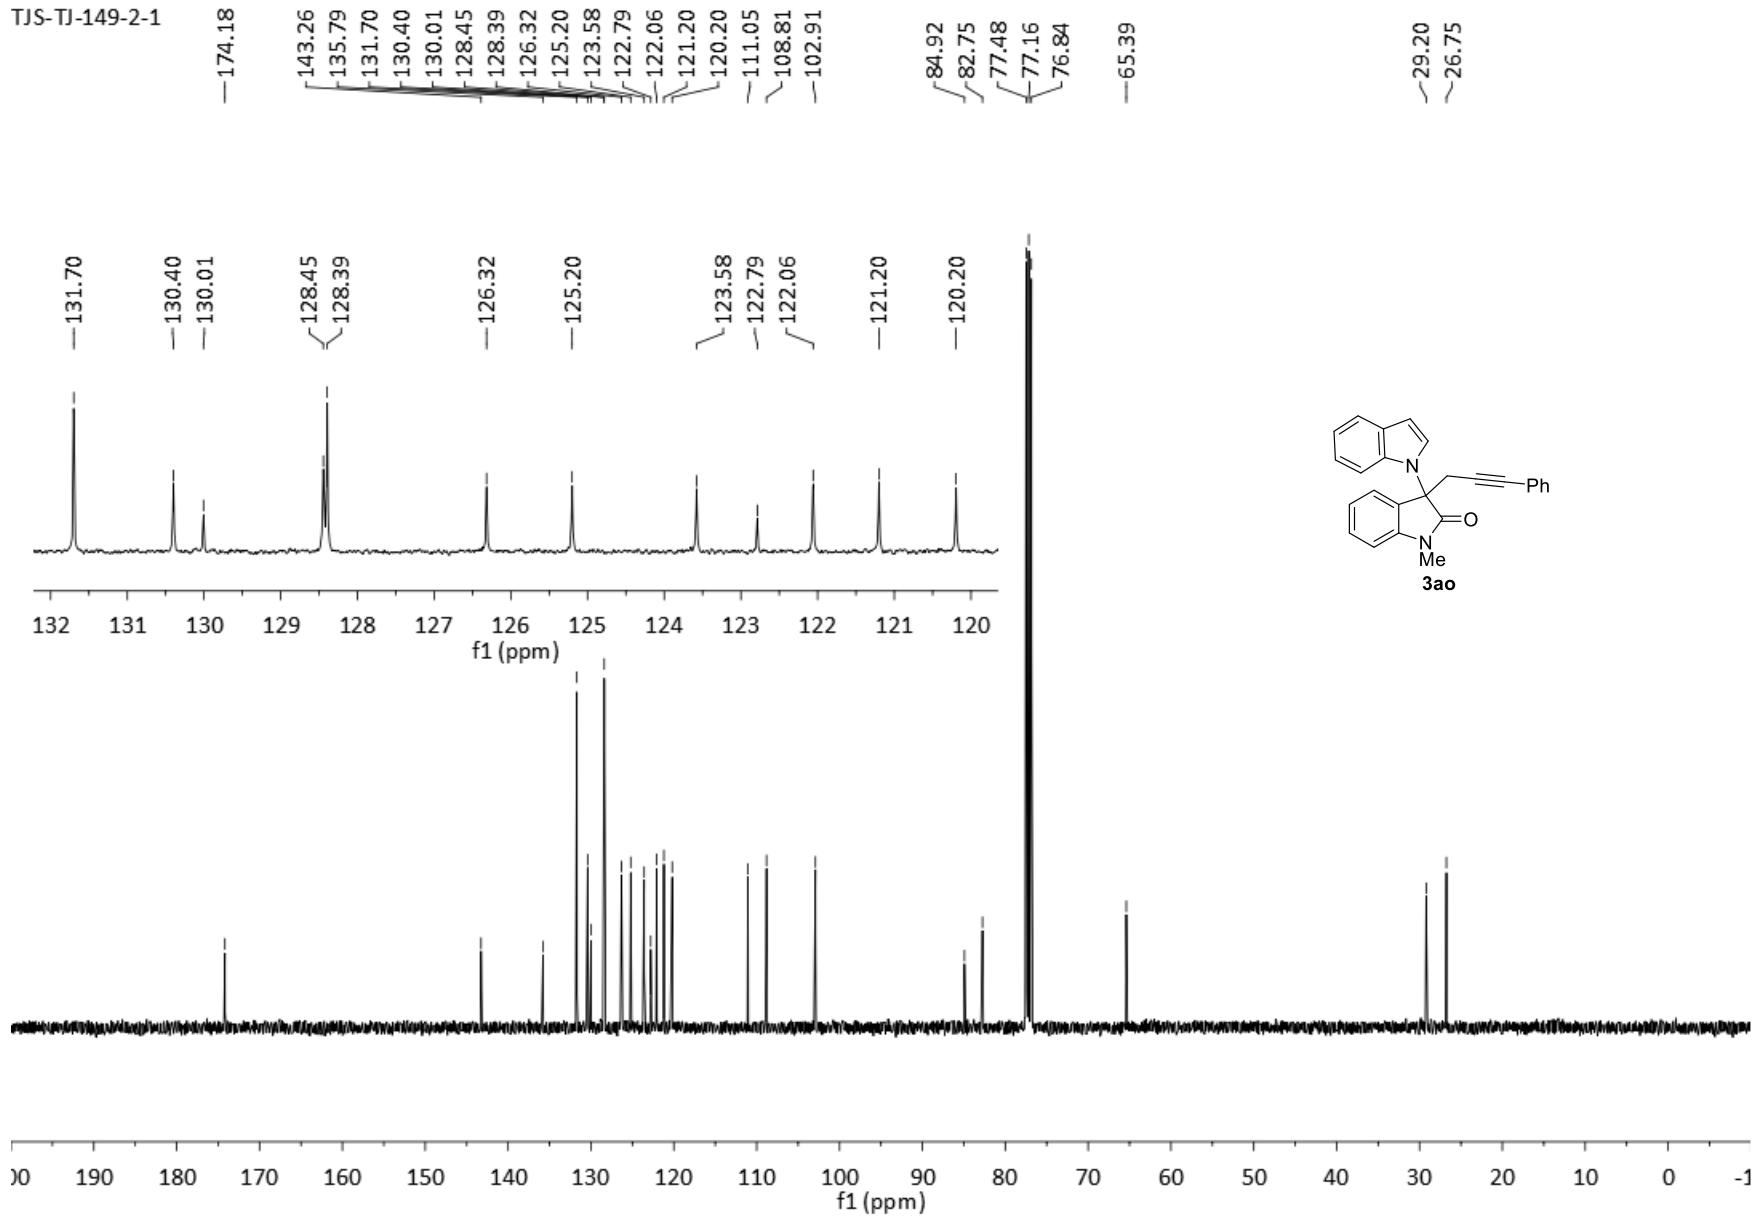

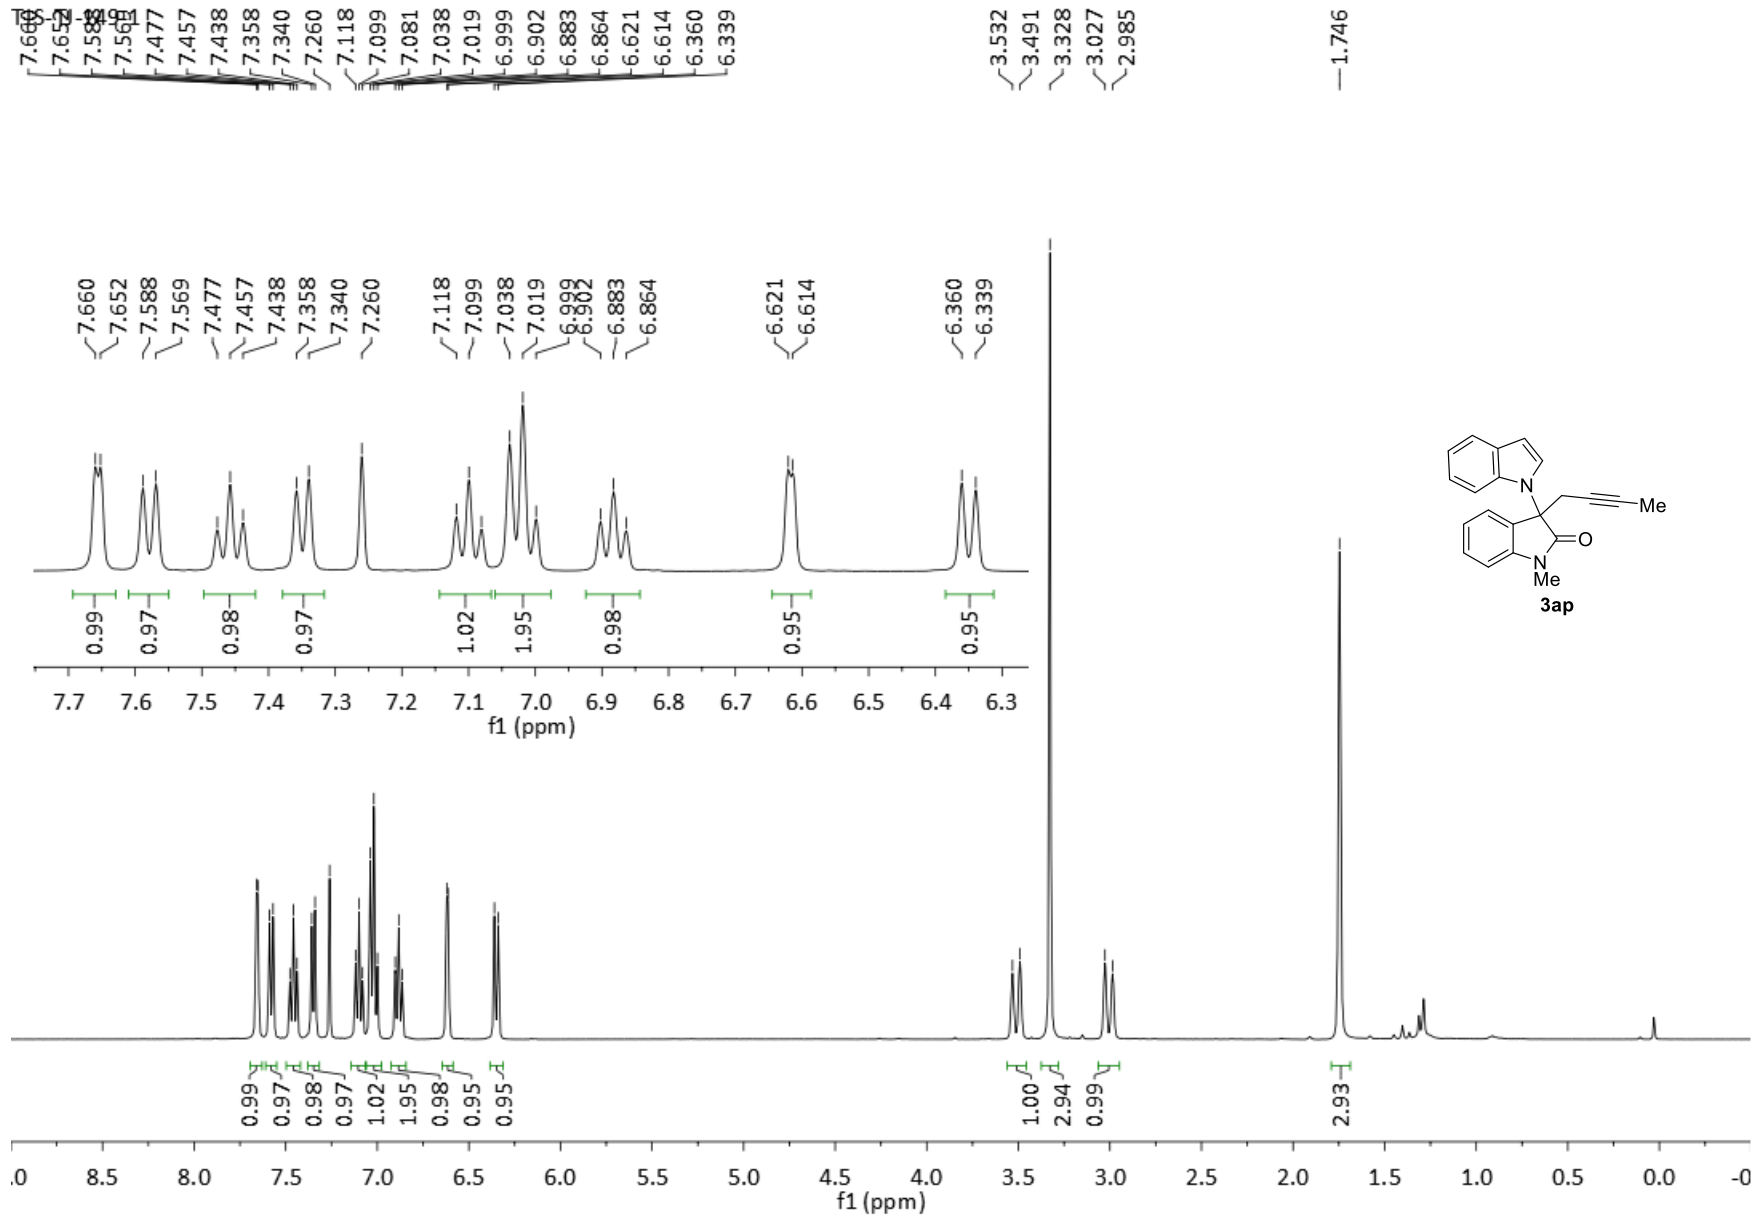

TJS-TJ-149-1

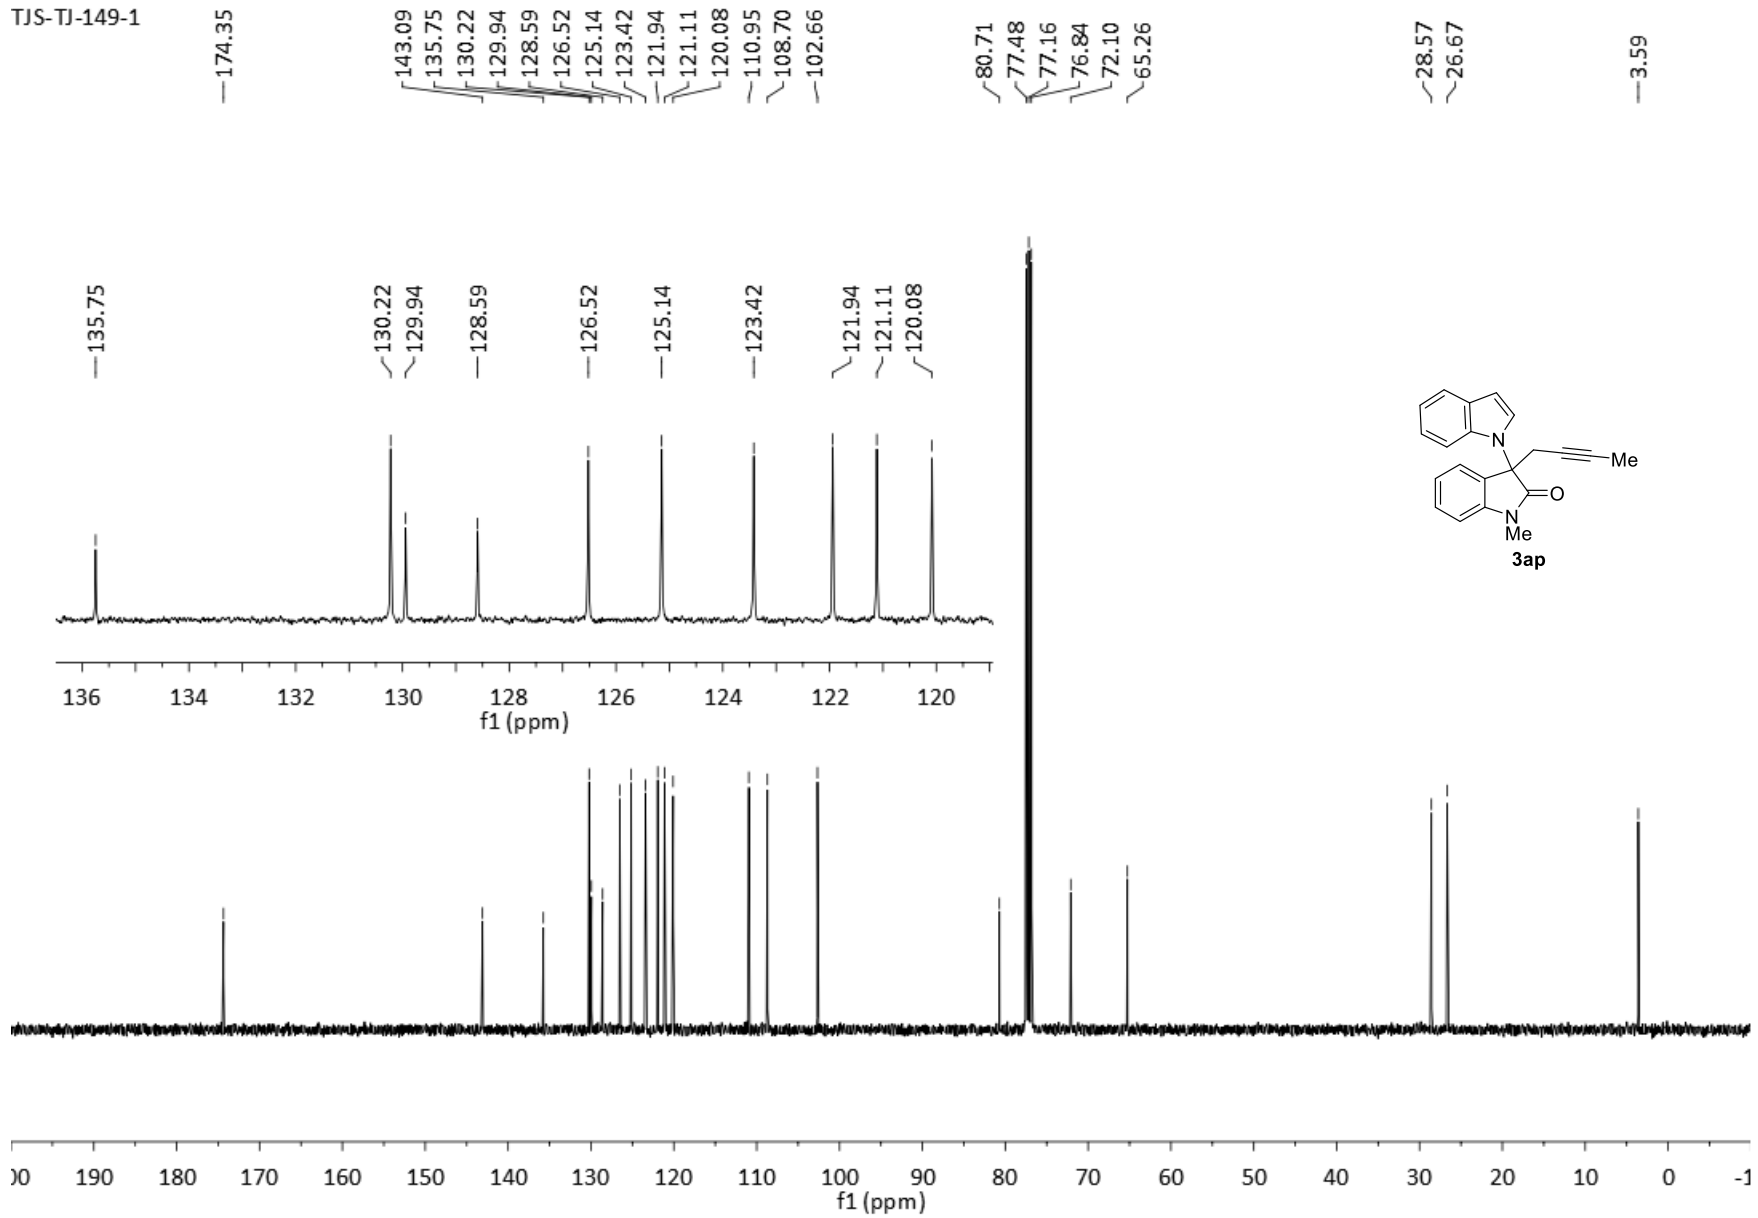



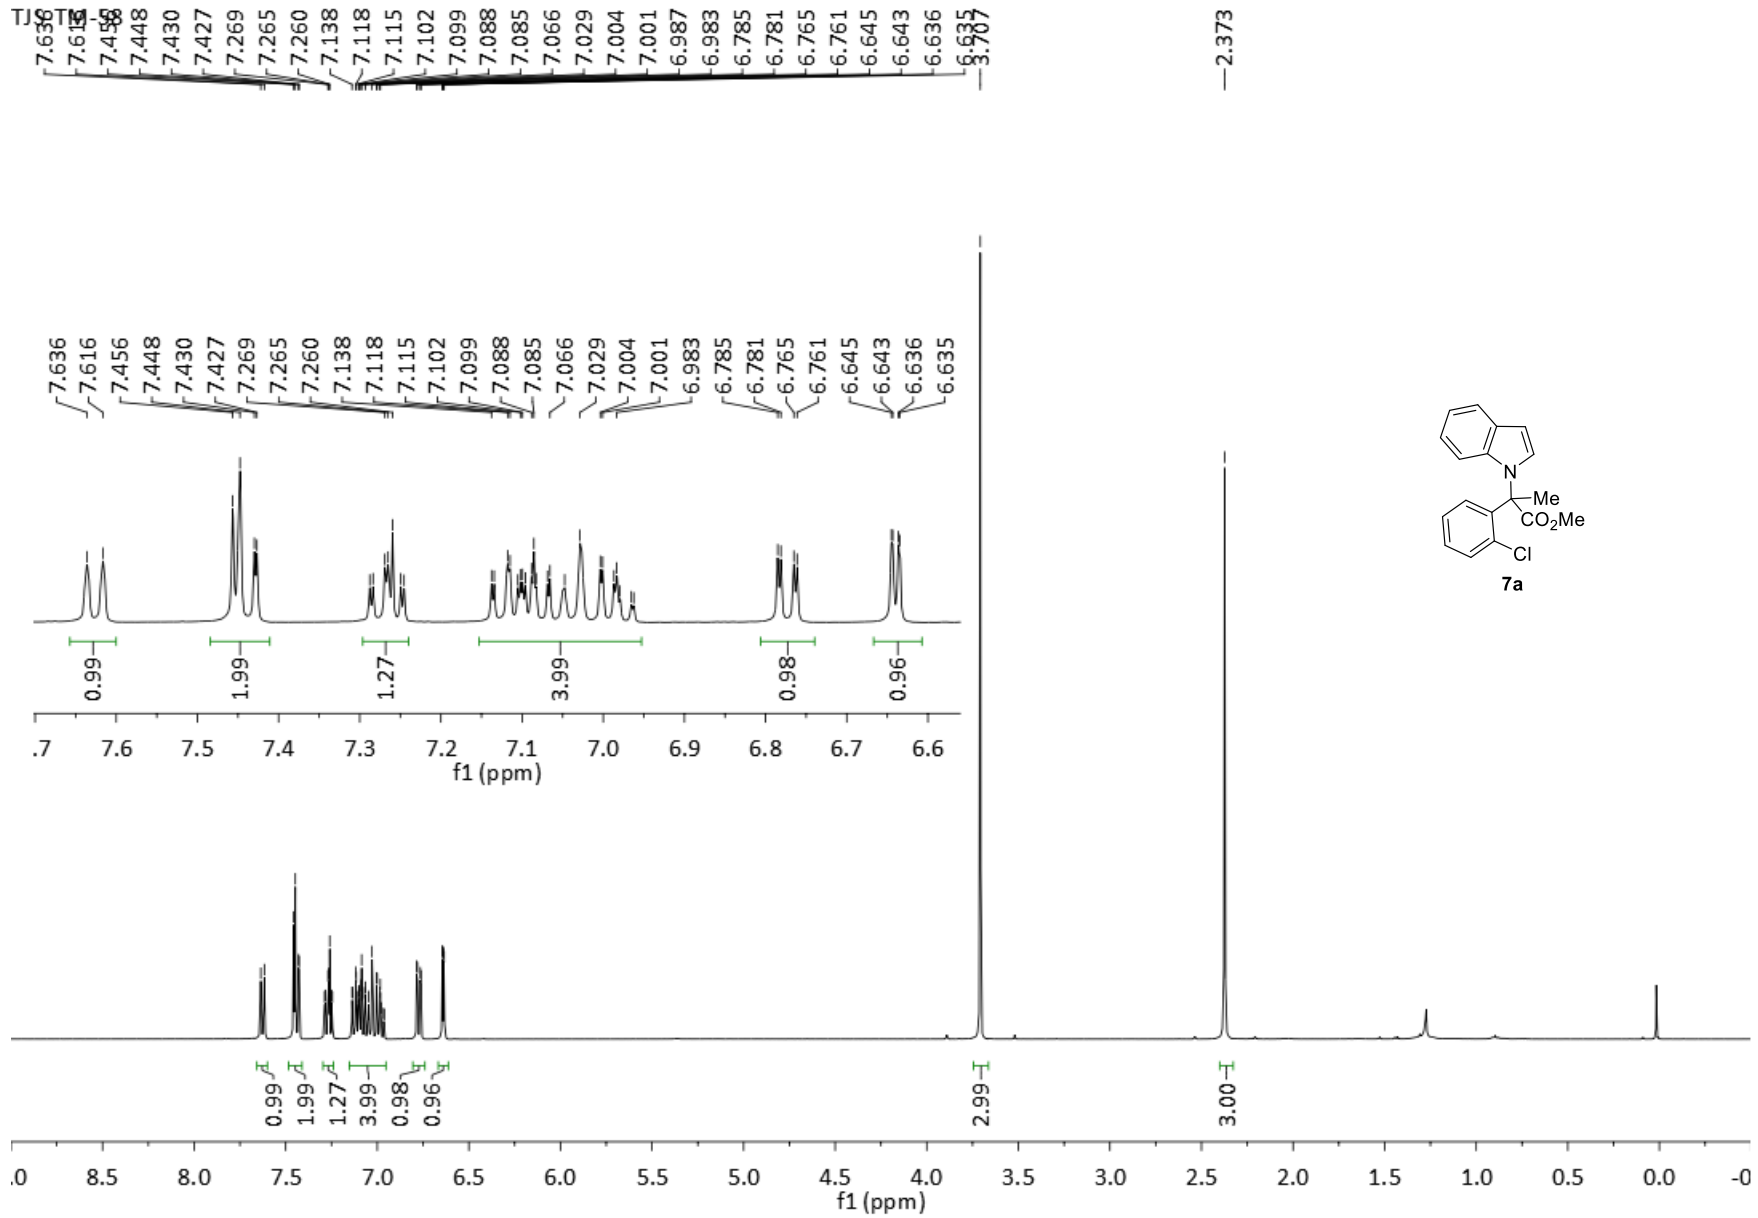

TJS-TM-58

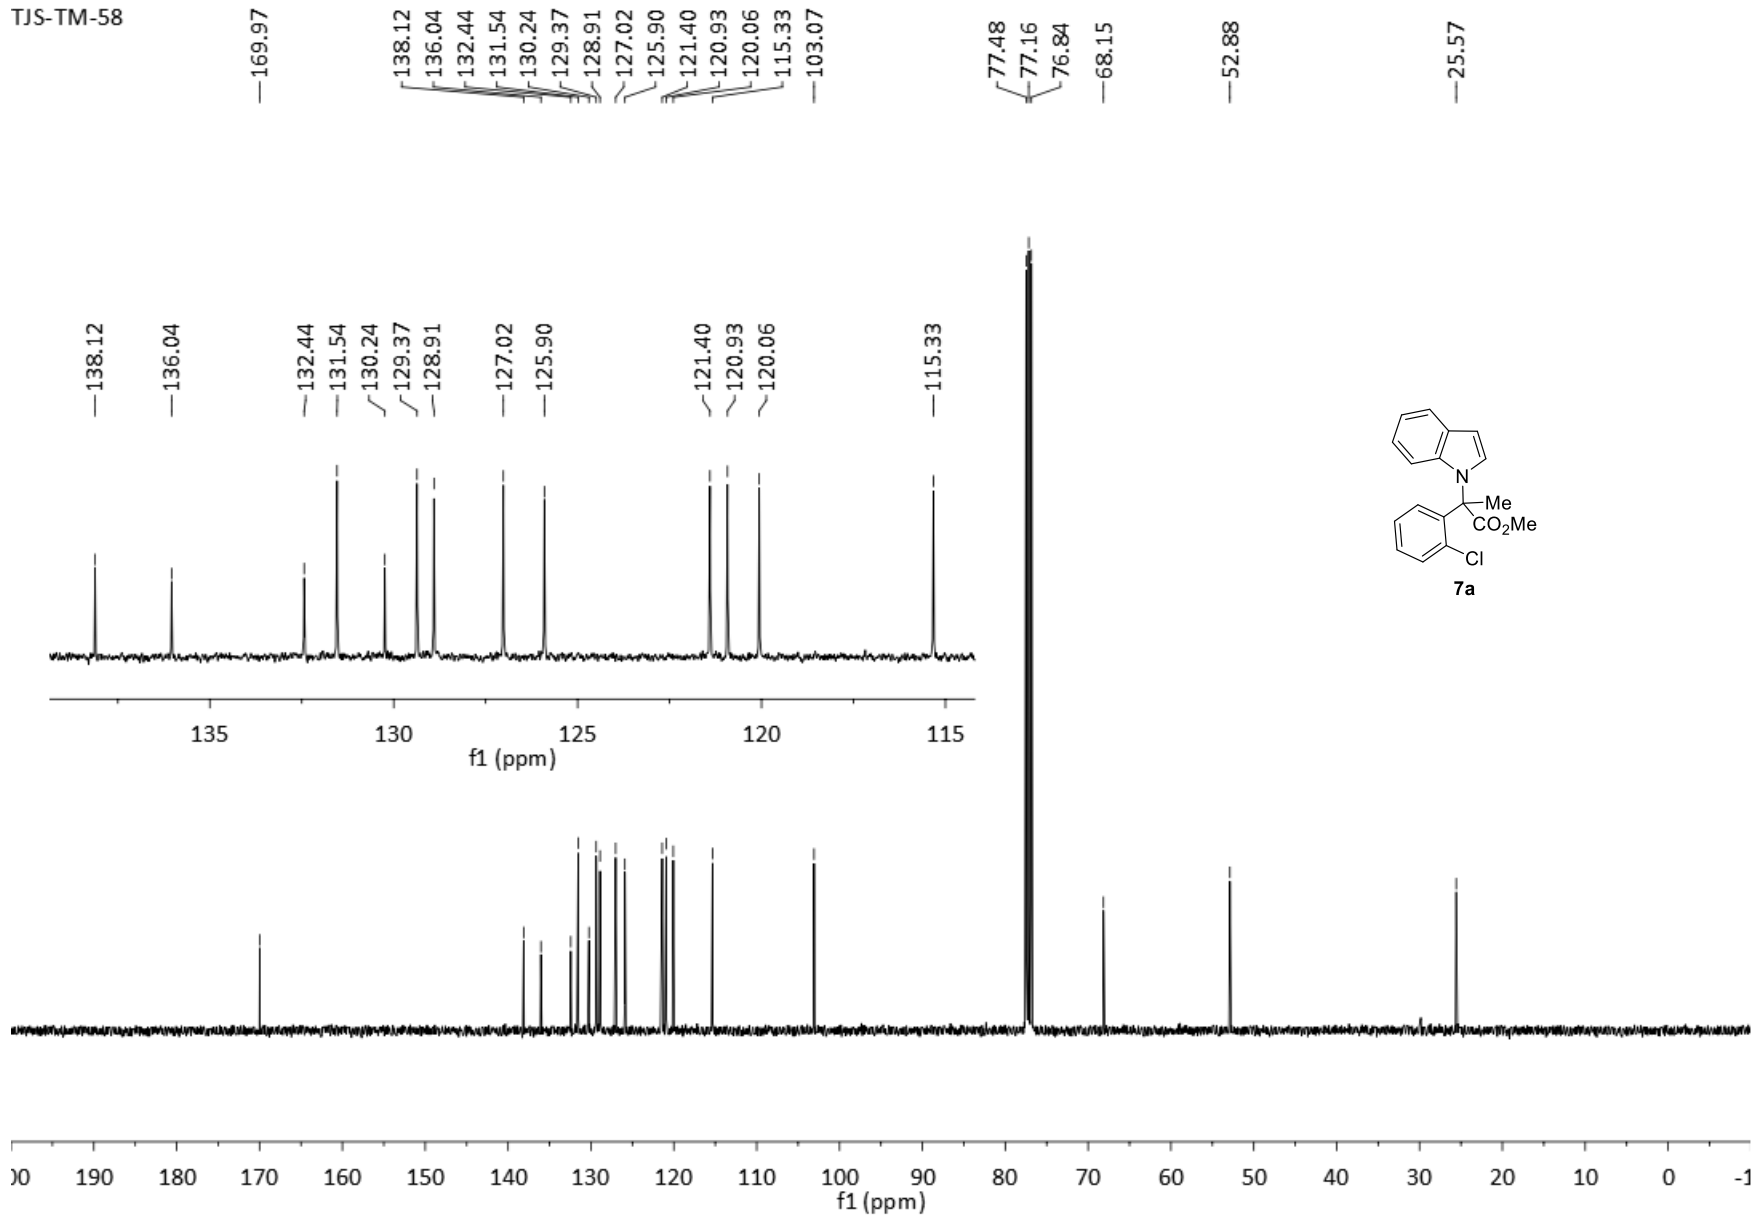

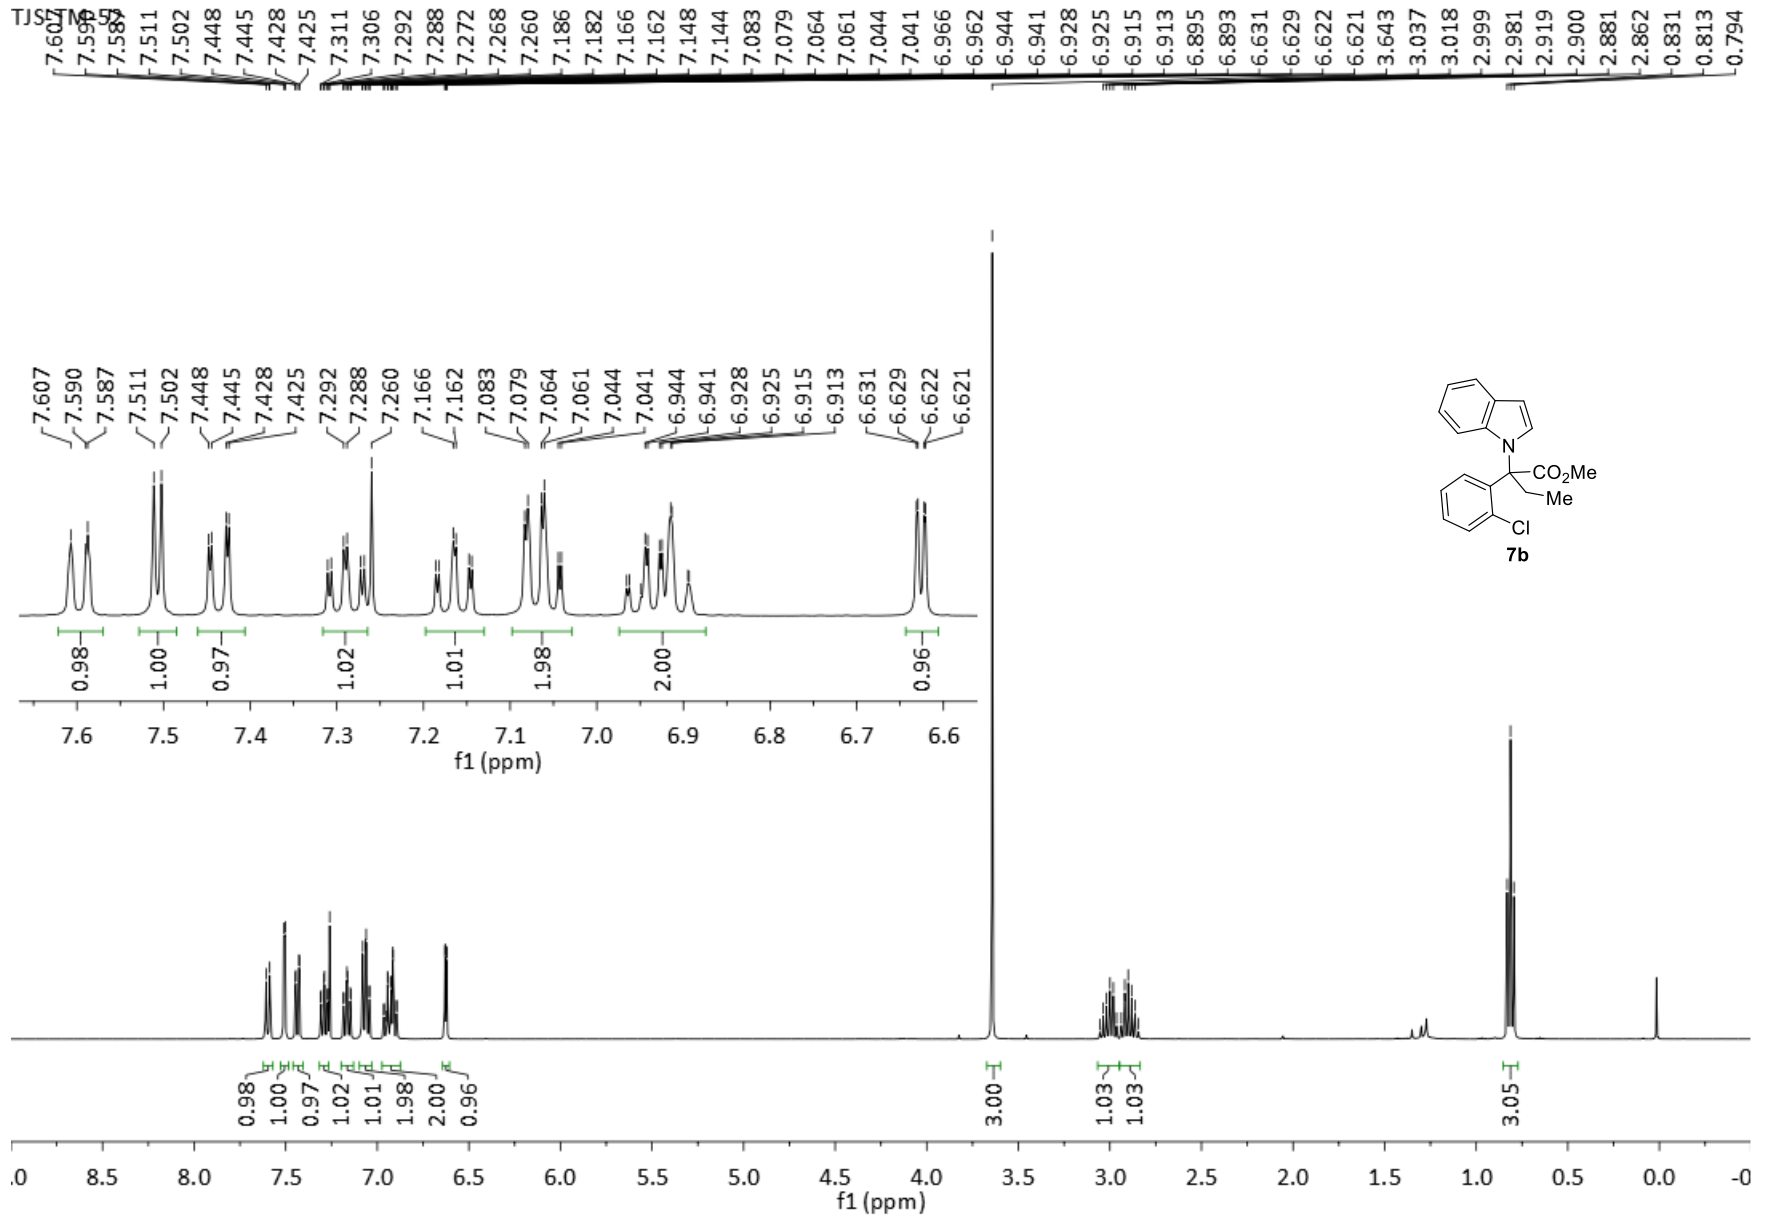

TJS-TM-52

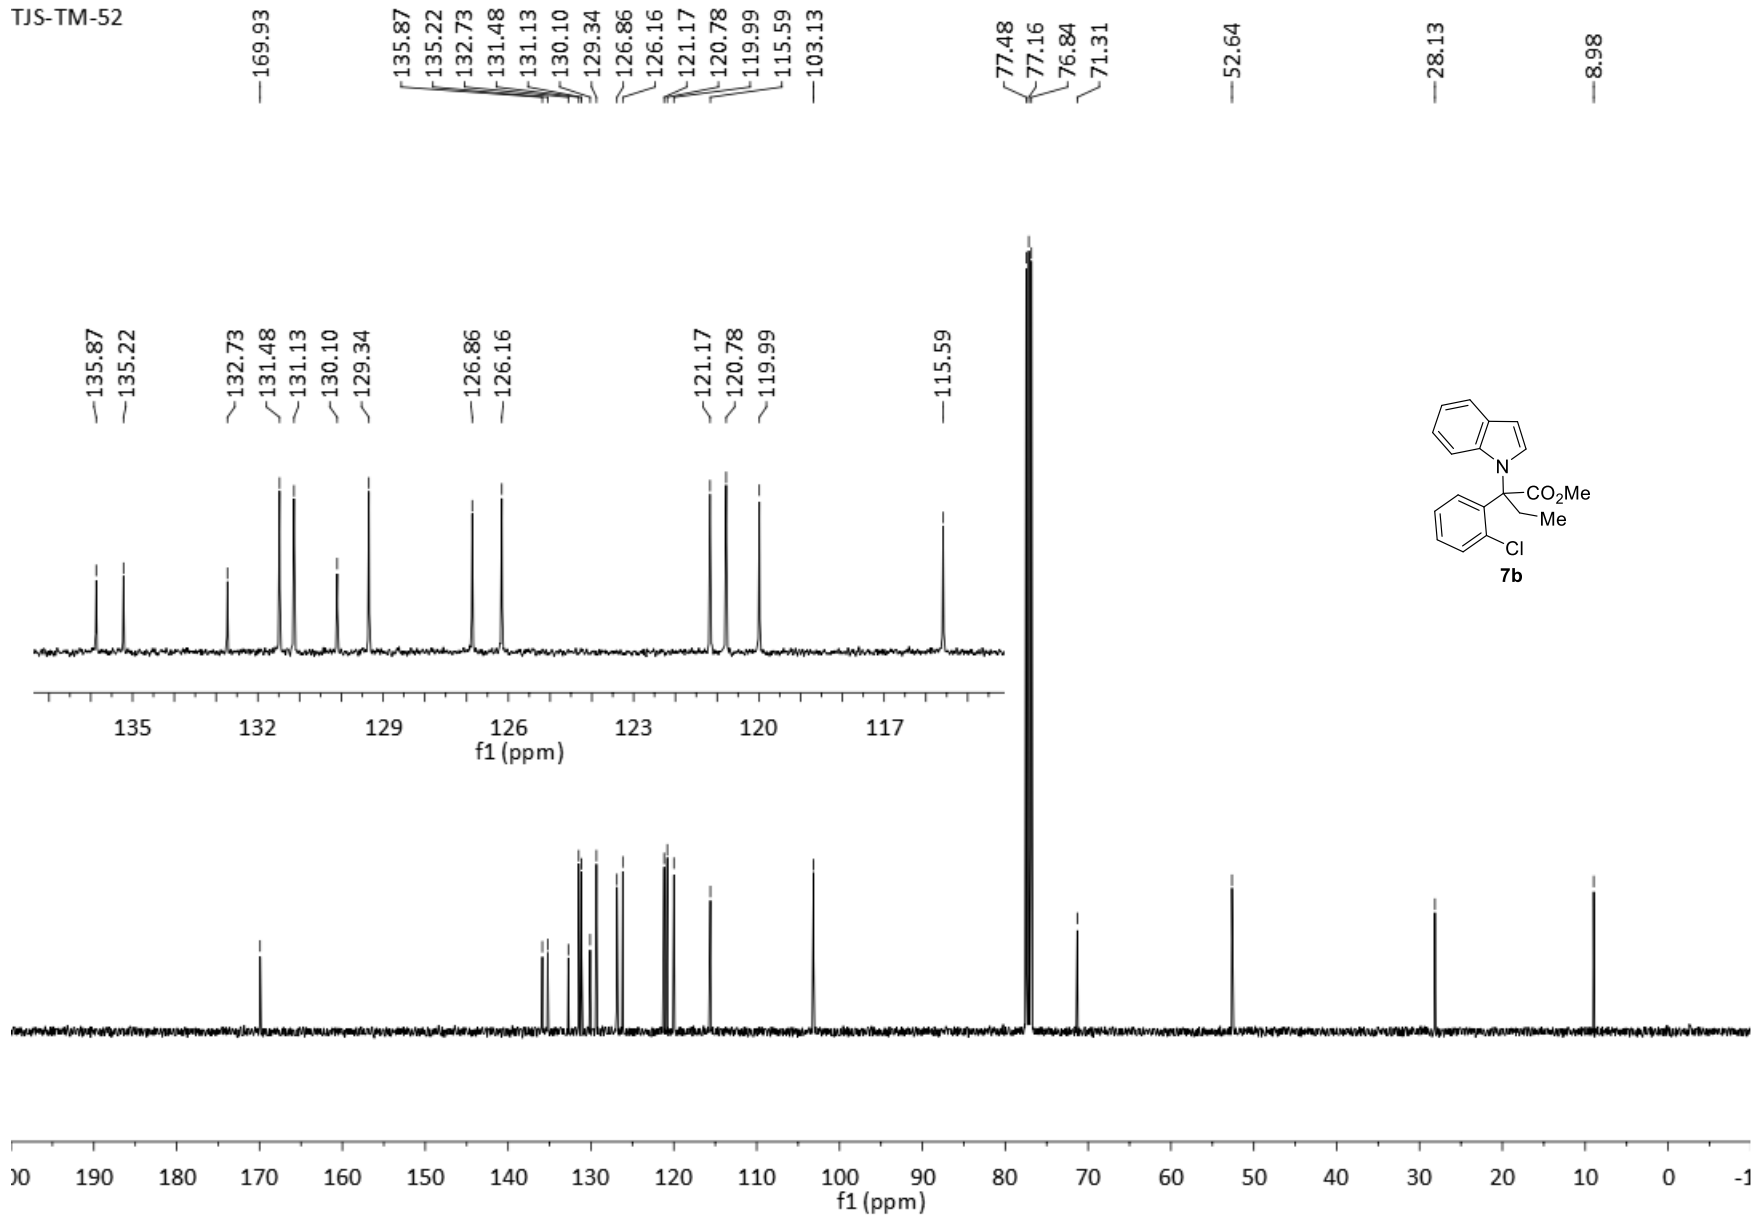

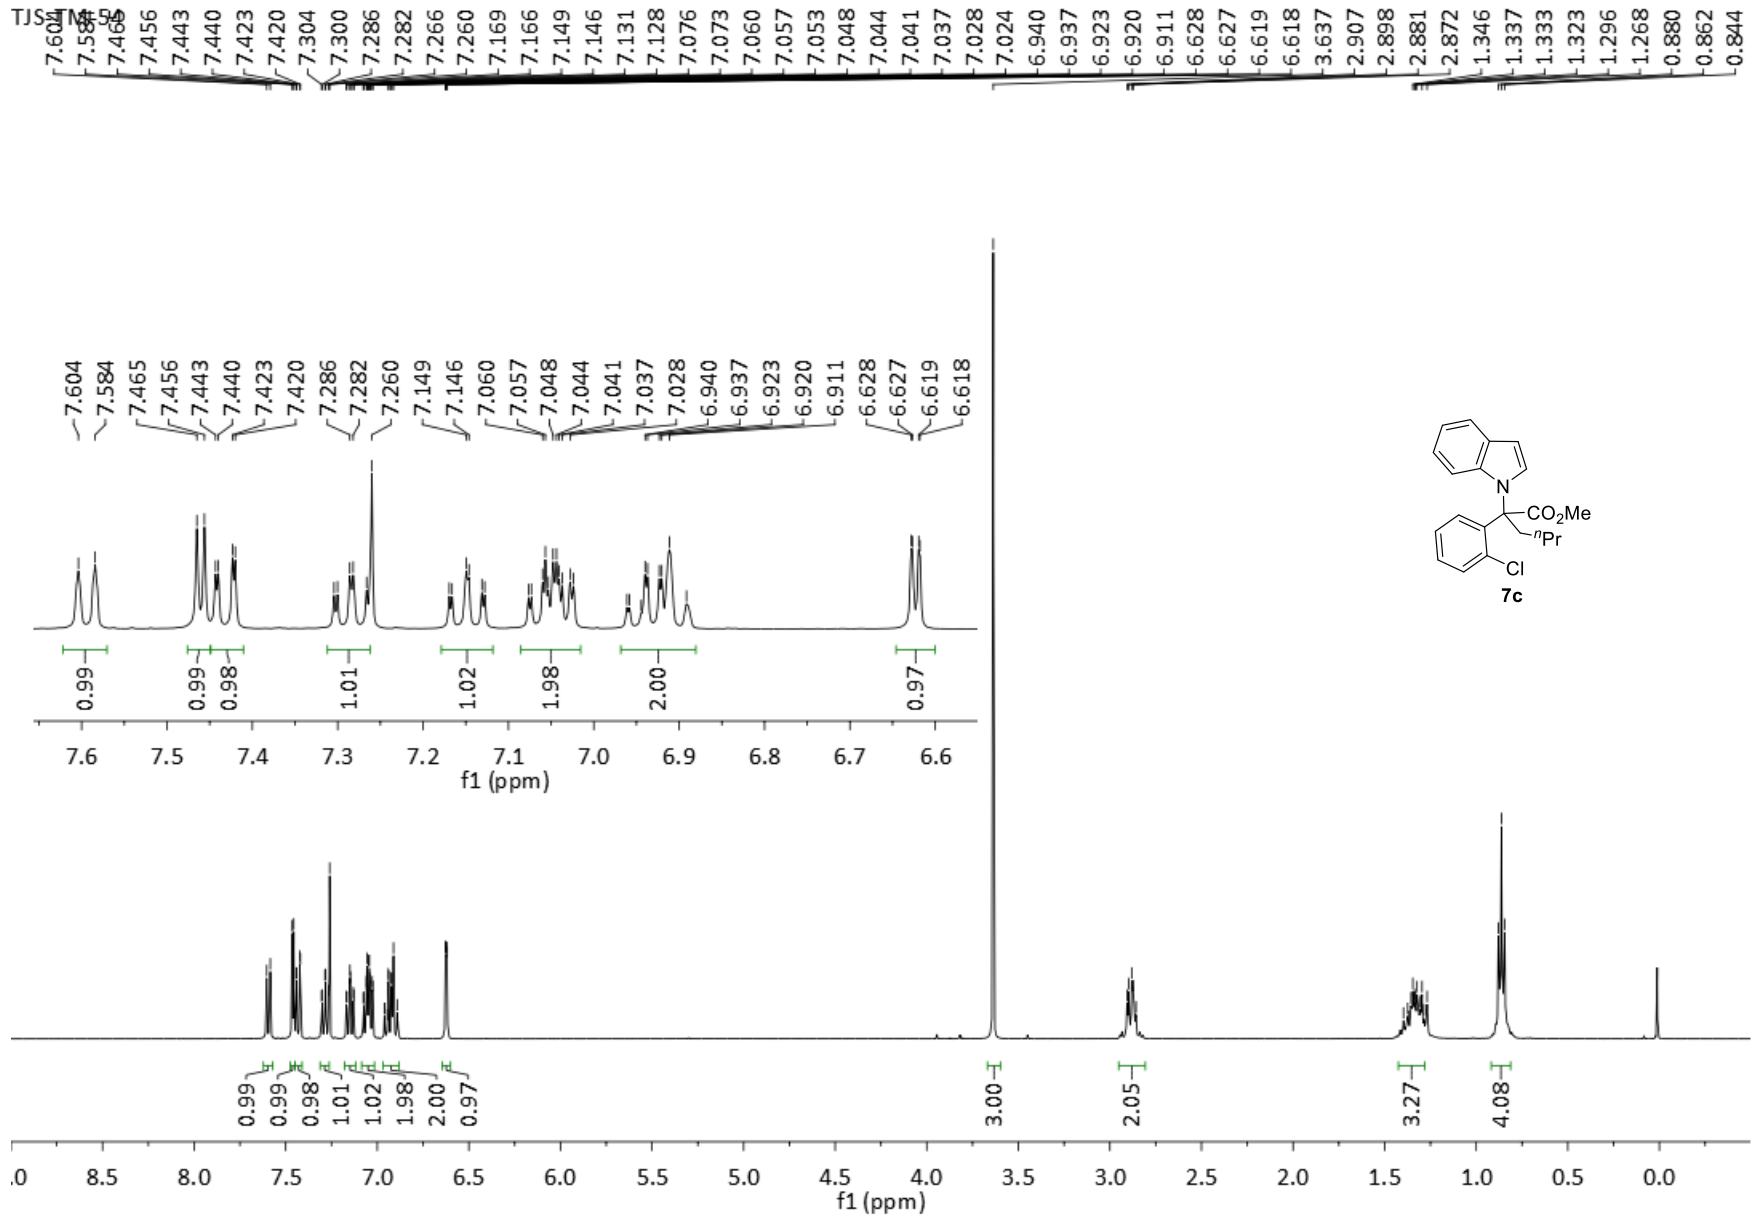

TJS-TM-54

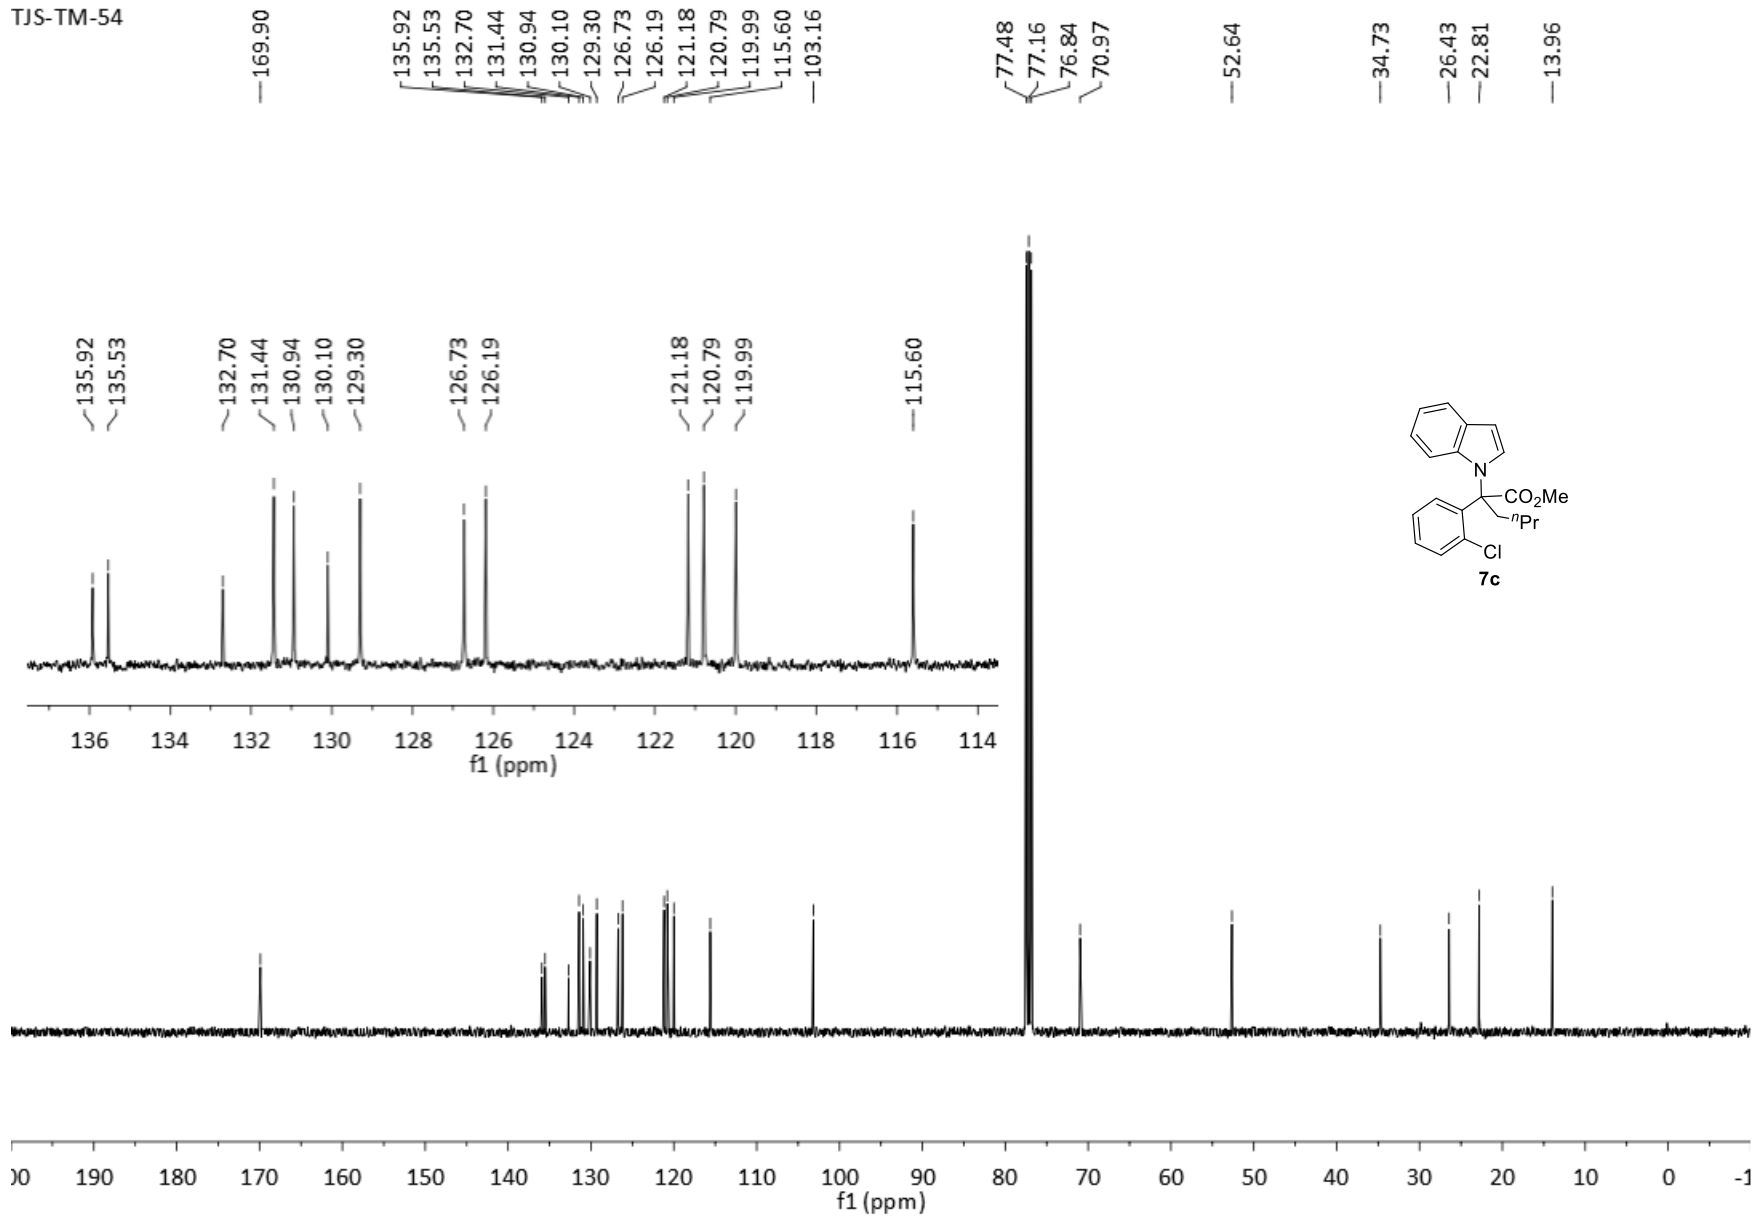

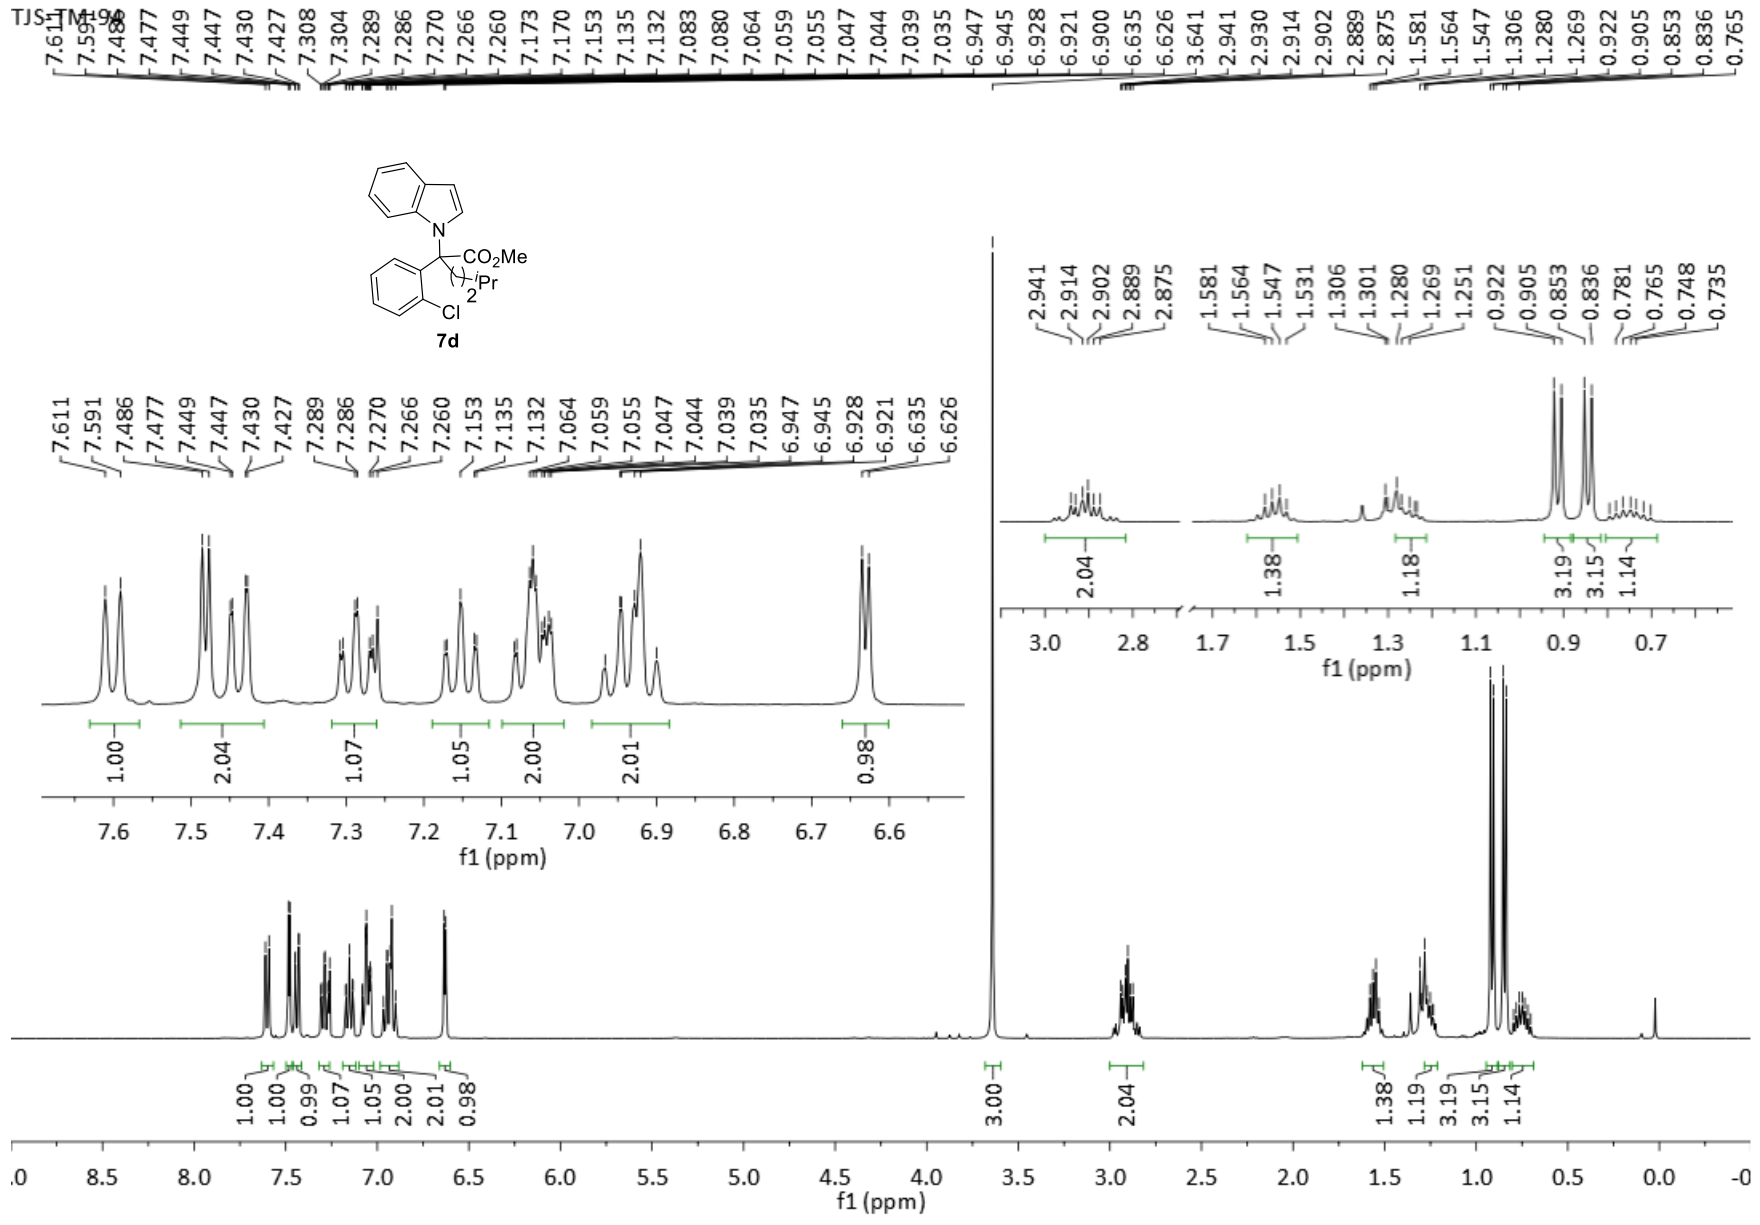

TJS-TM-94

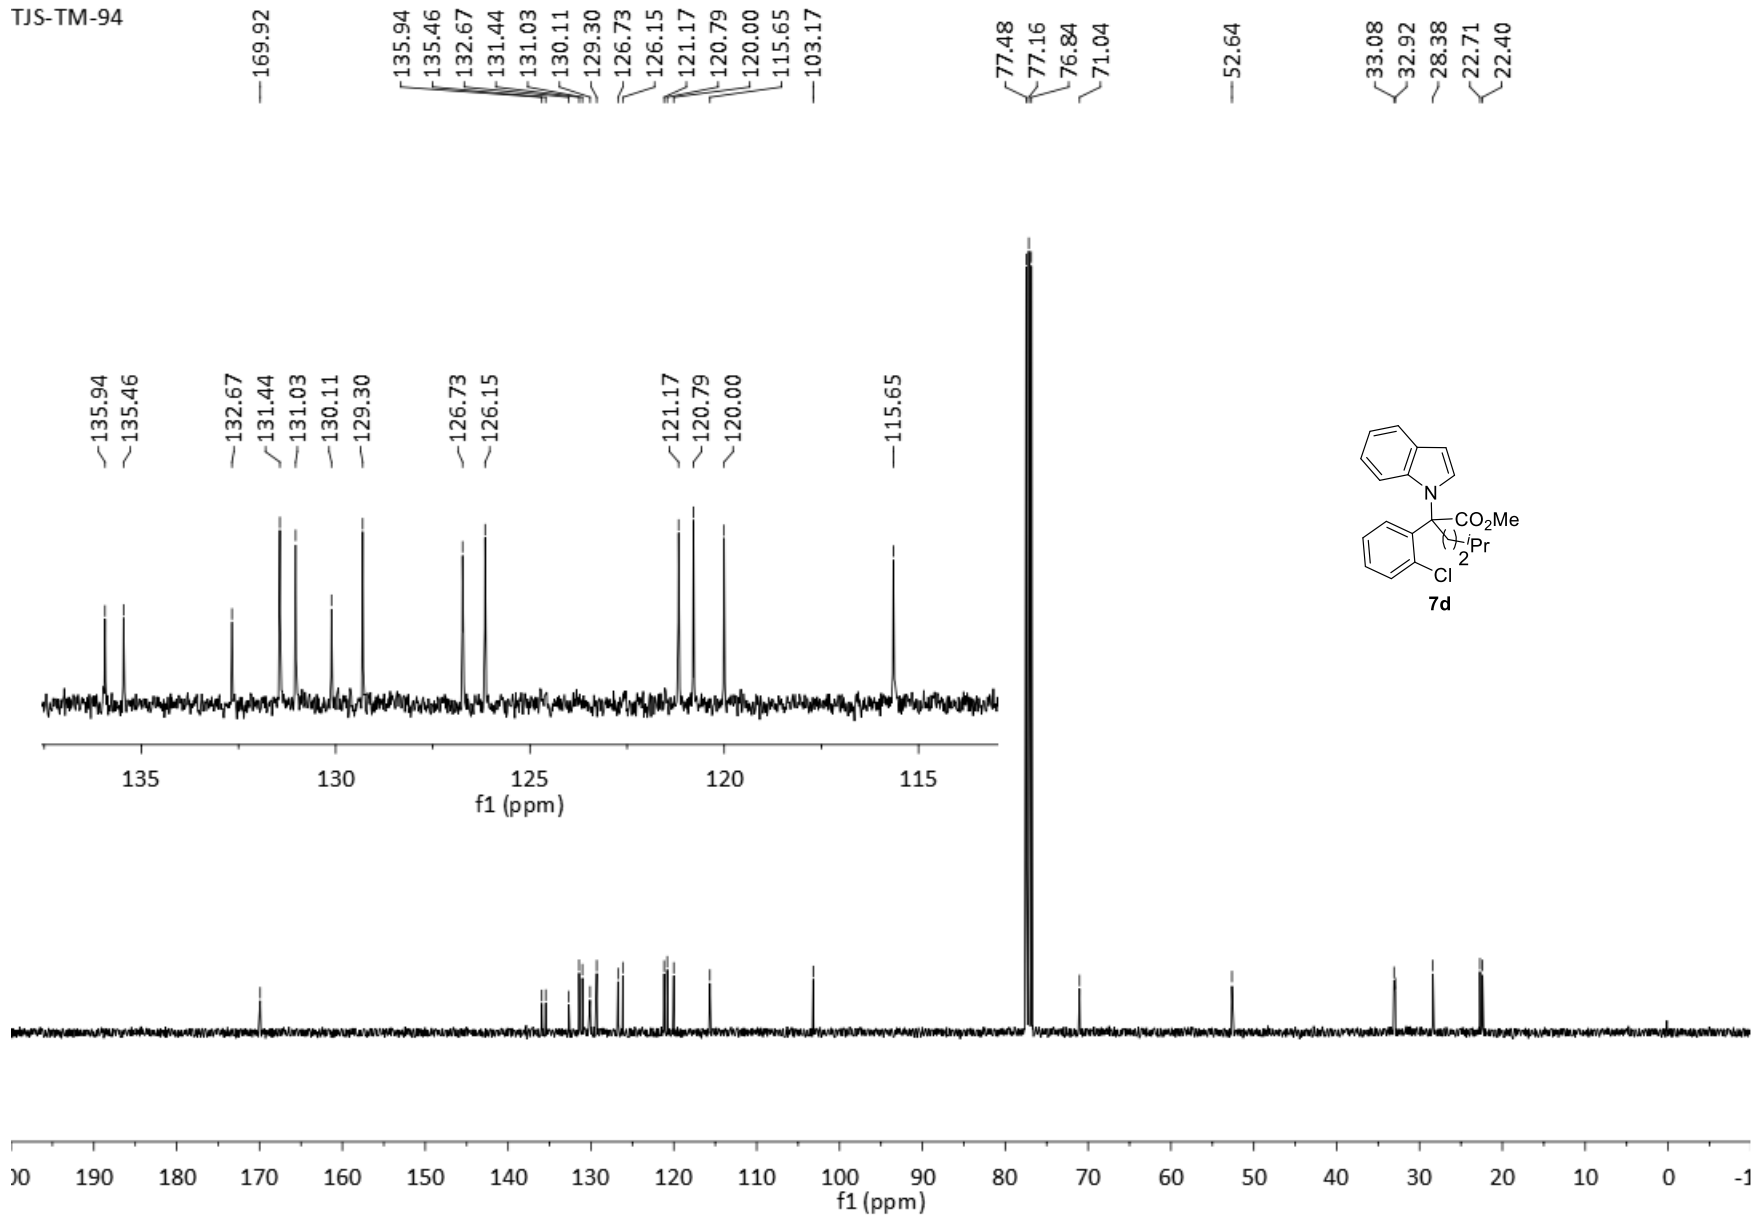



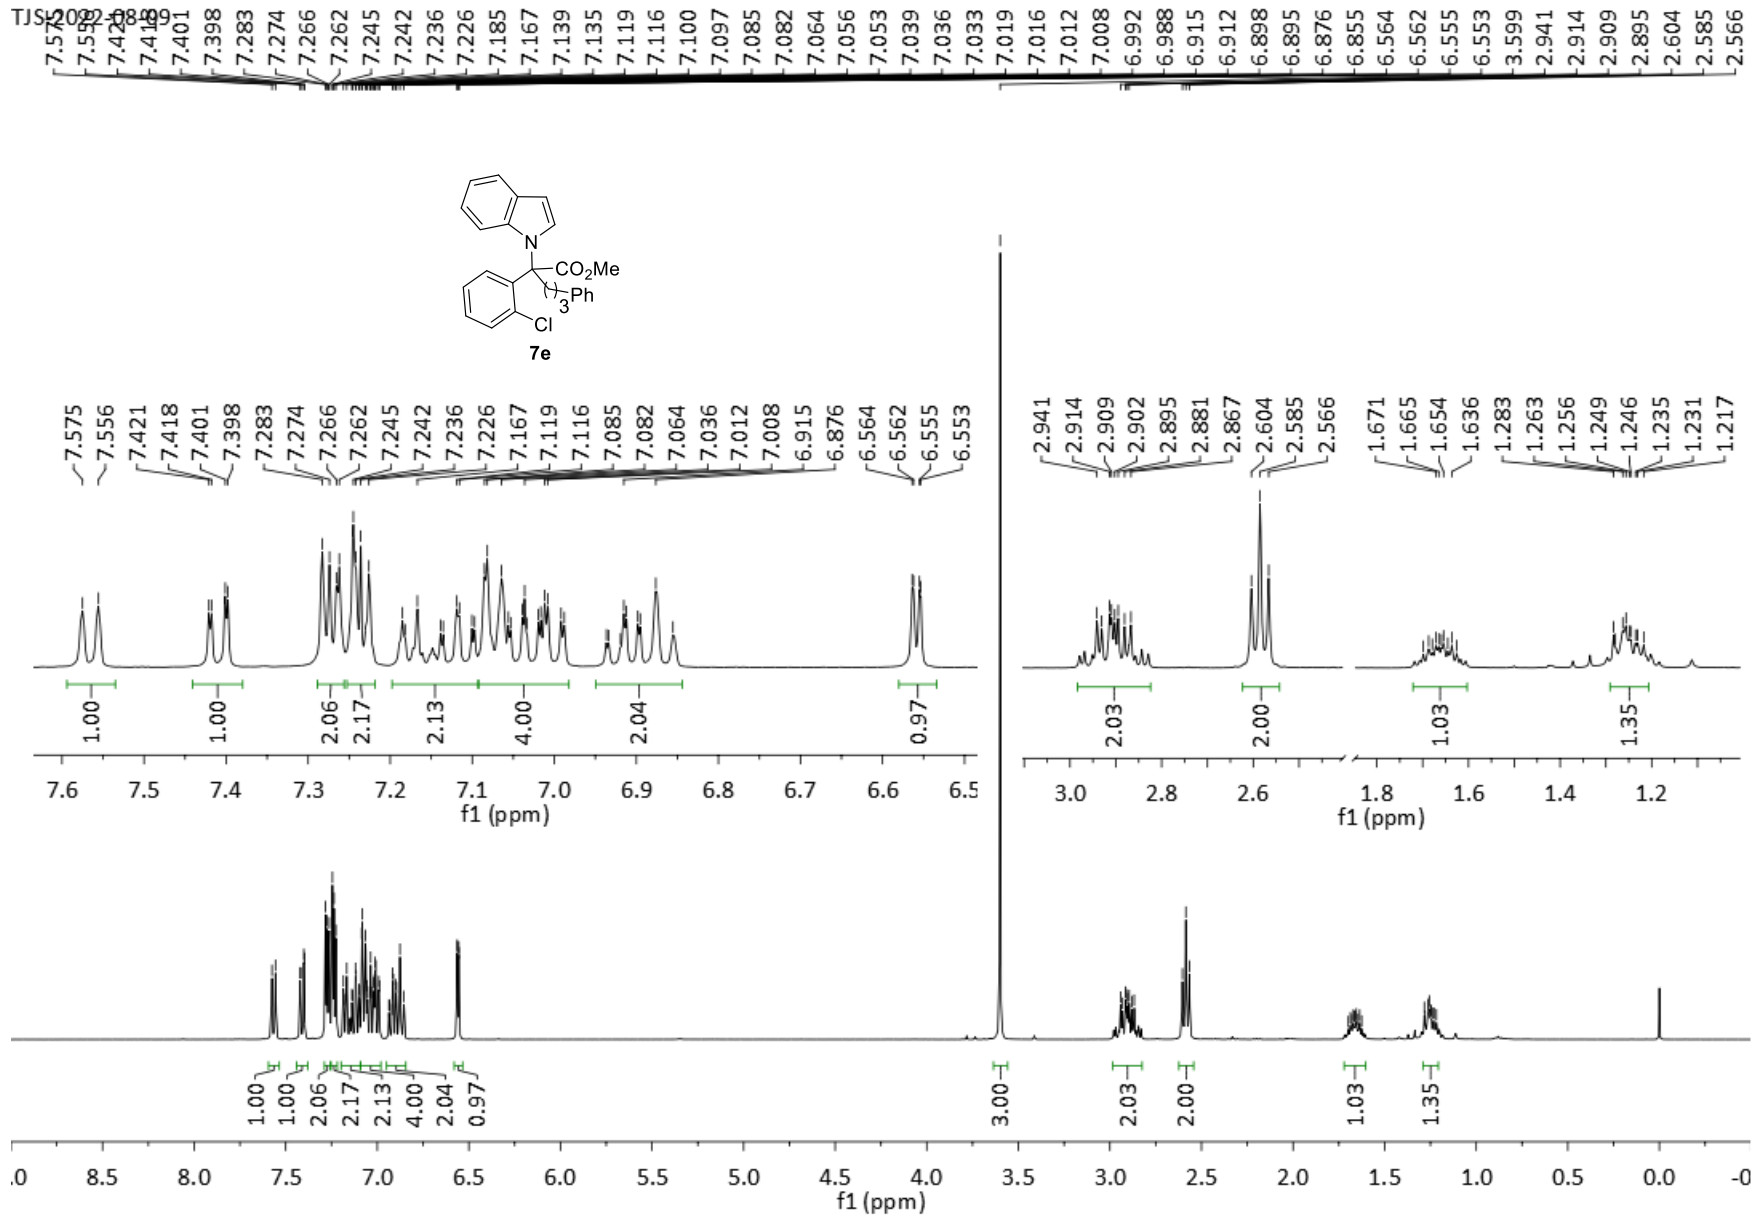

TJS-2022-08-09

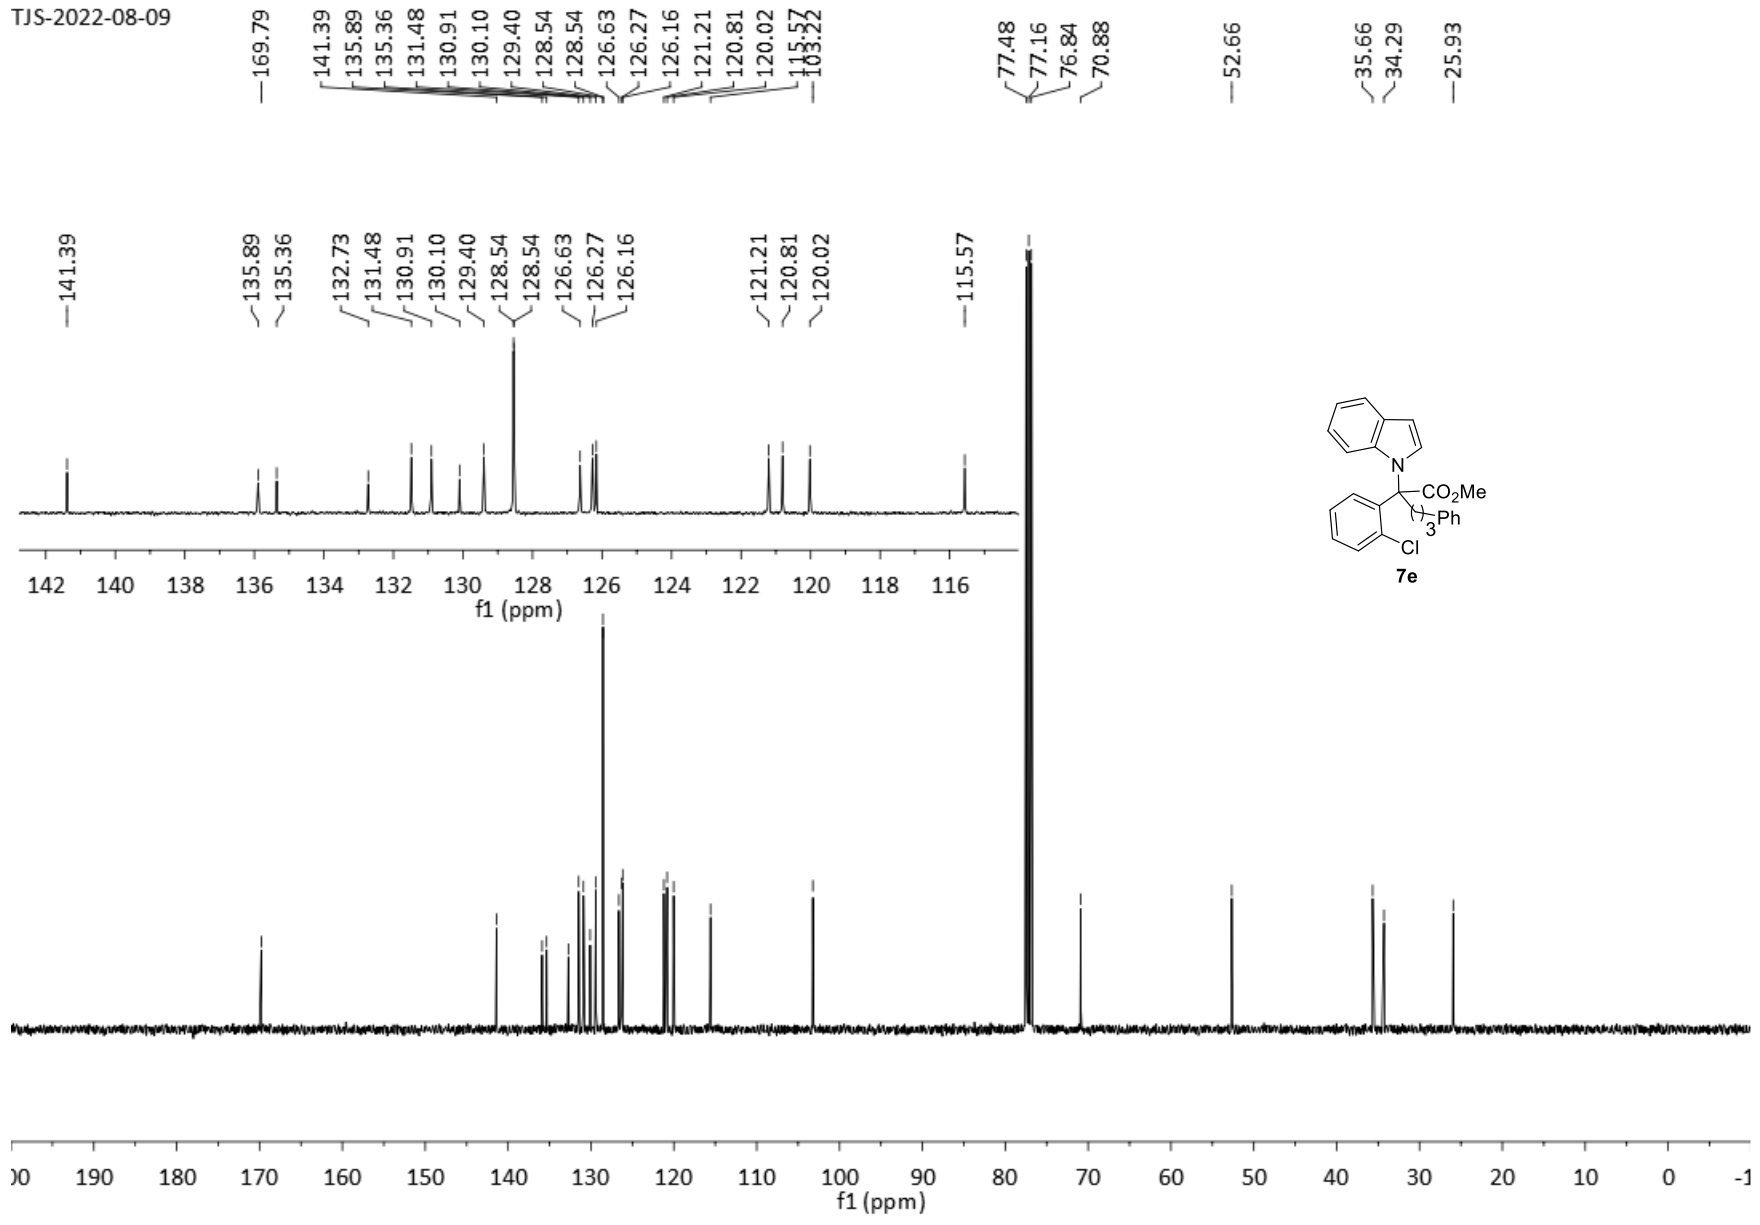

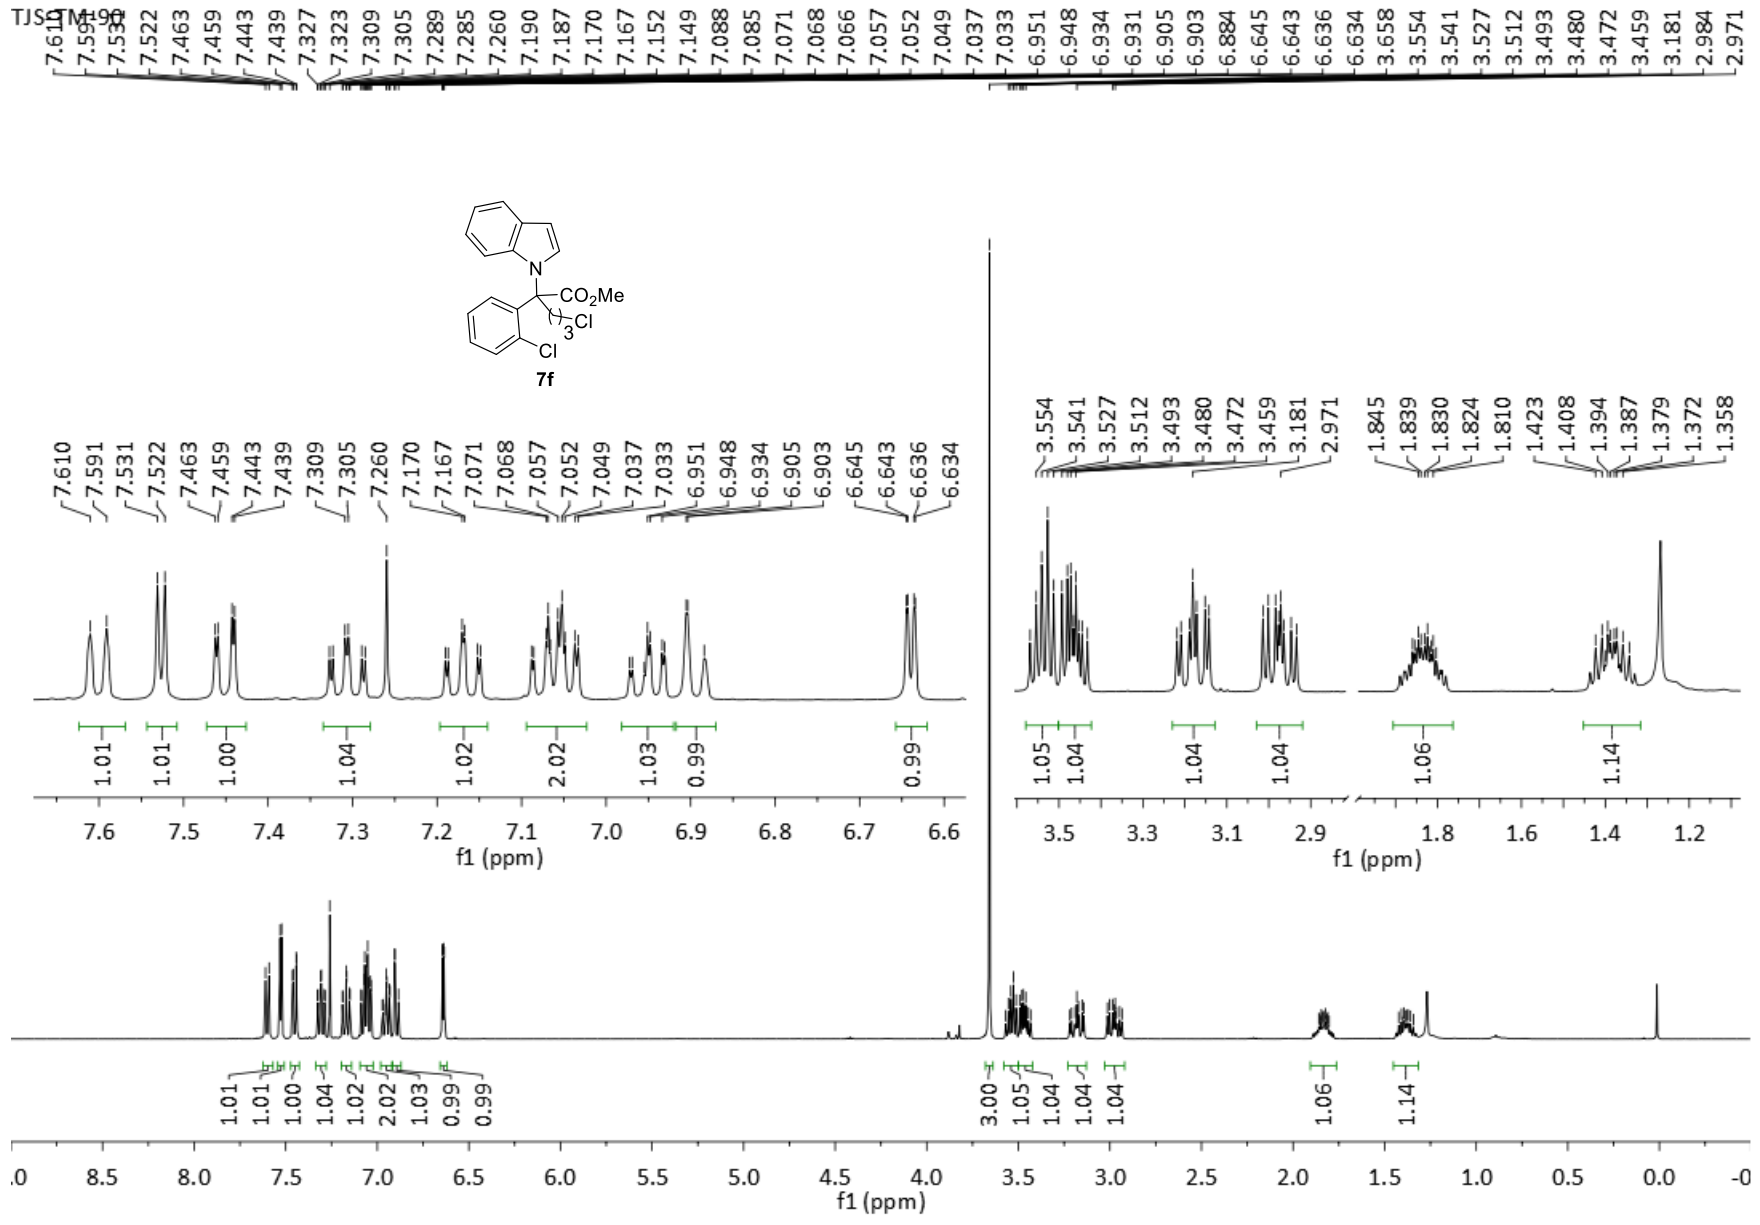

DWG-2-137-P1A  
DWG-2-137-P1A

—169.58  
135.89  
135.17  
132.73  
131.66  
130.73  
130.73  
130.14  
130.14  
129.65  
126.56  
126.45  
121.35  
120.92  
120.16  
115.54  
—103.56

77.48  
77.16  
76.84  
70.51

—52.83

—44.74

—32.72

—27.61

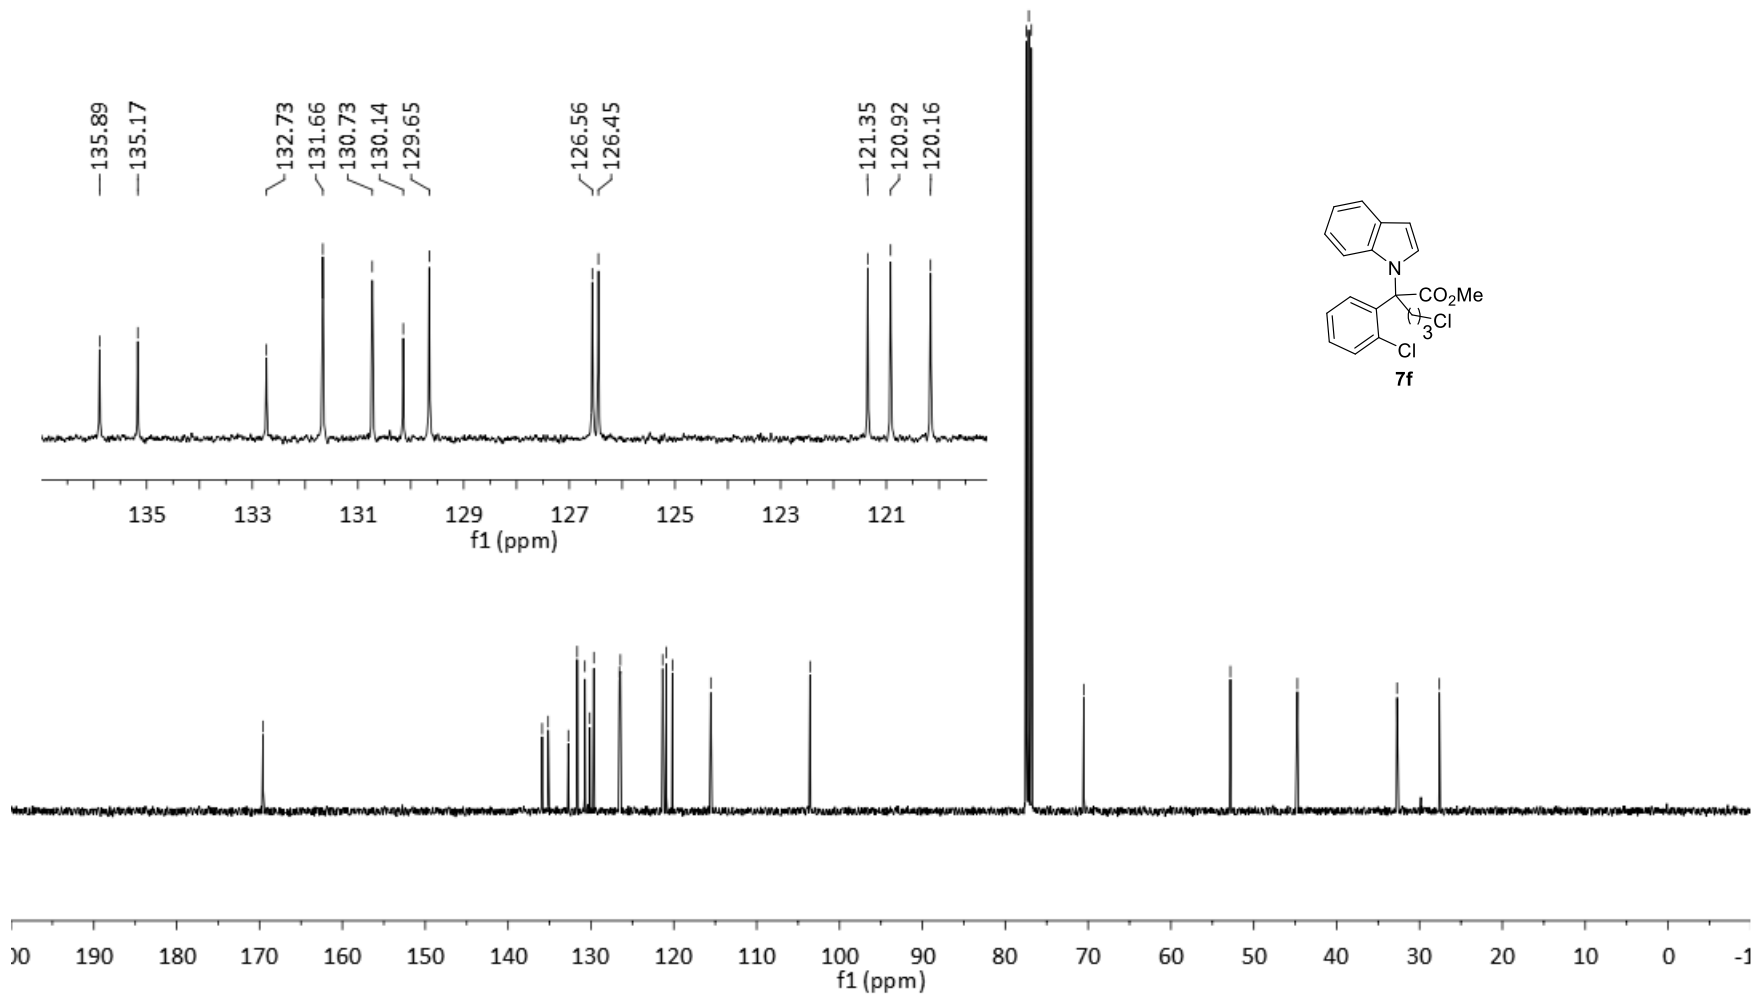

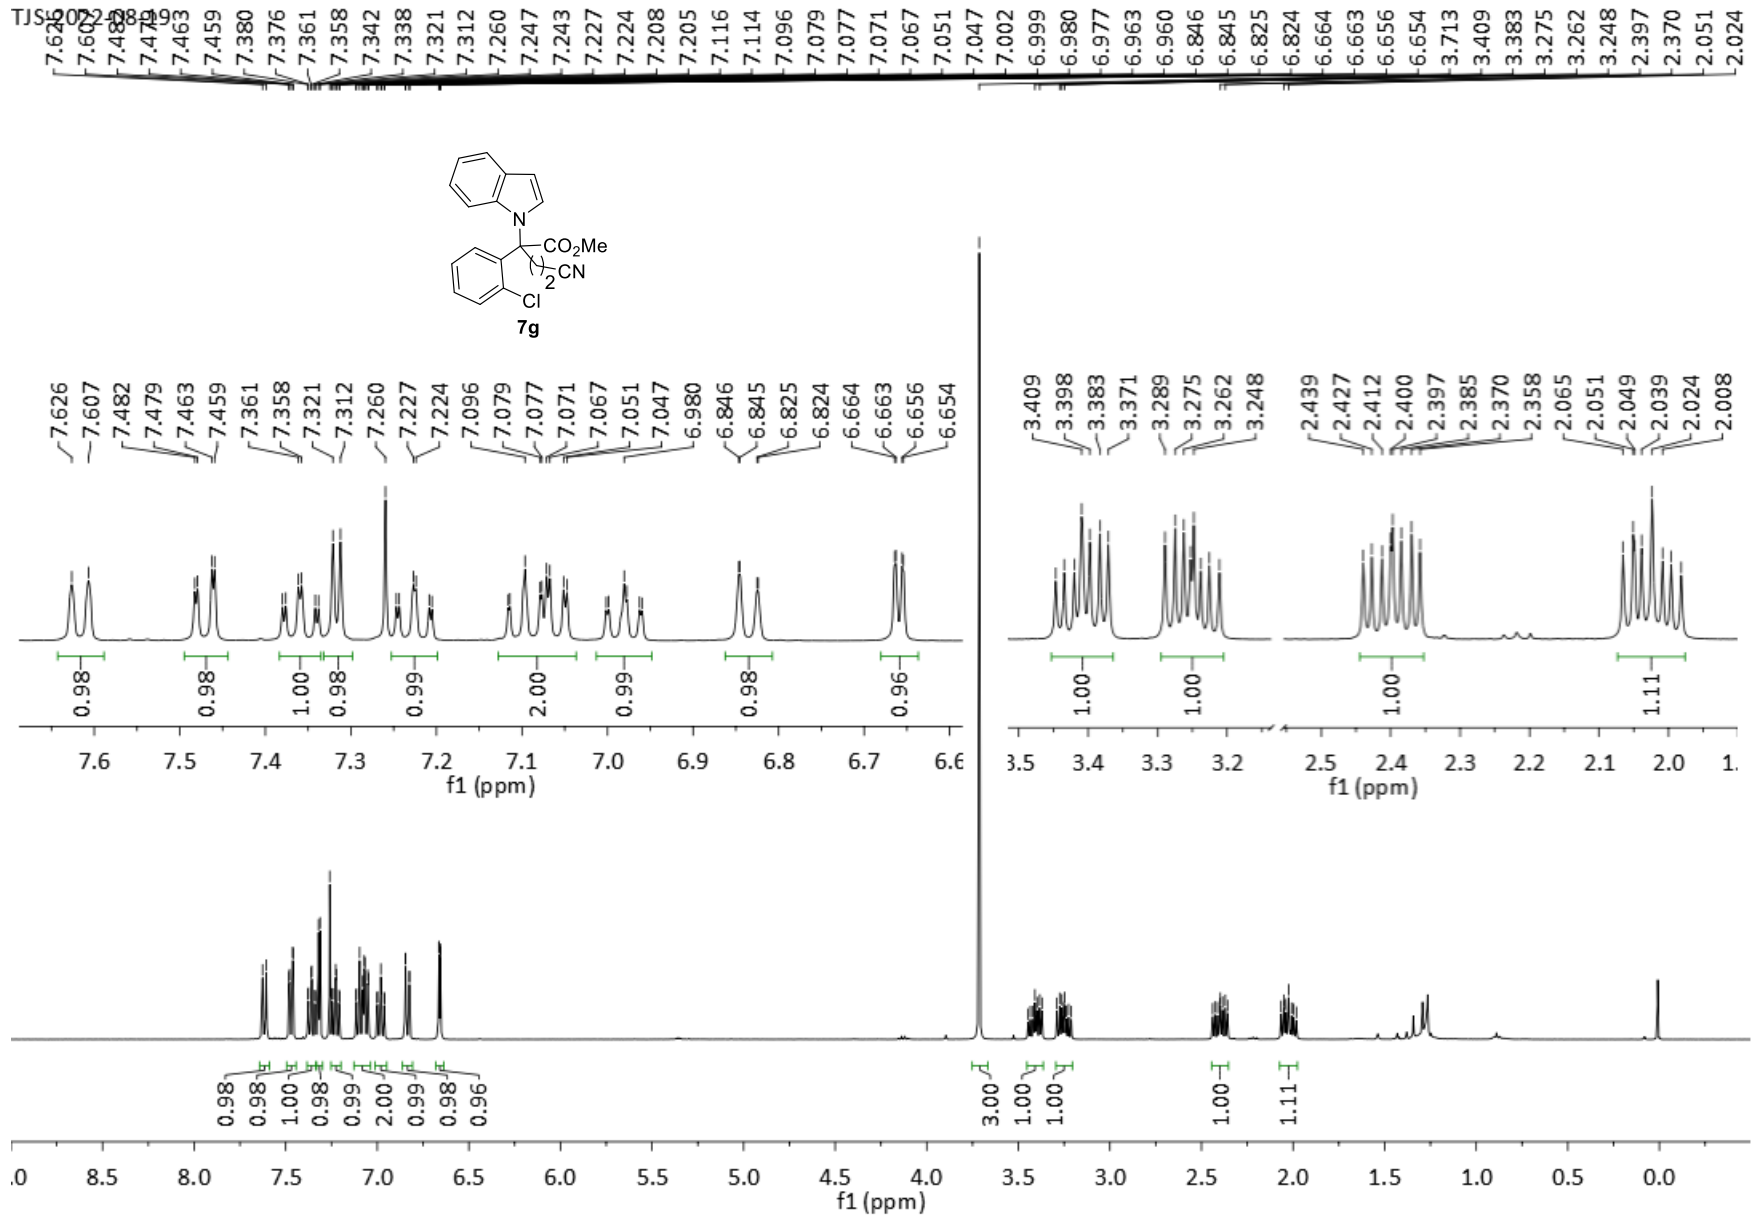

TJS-2022-08-19

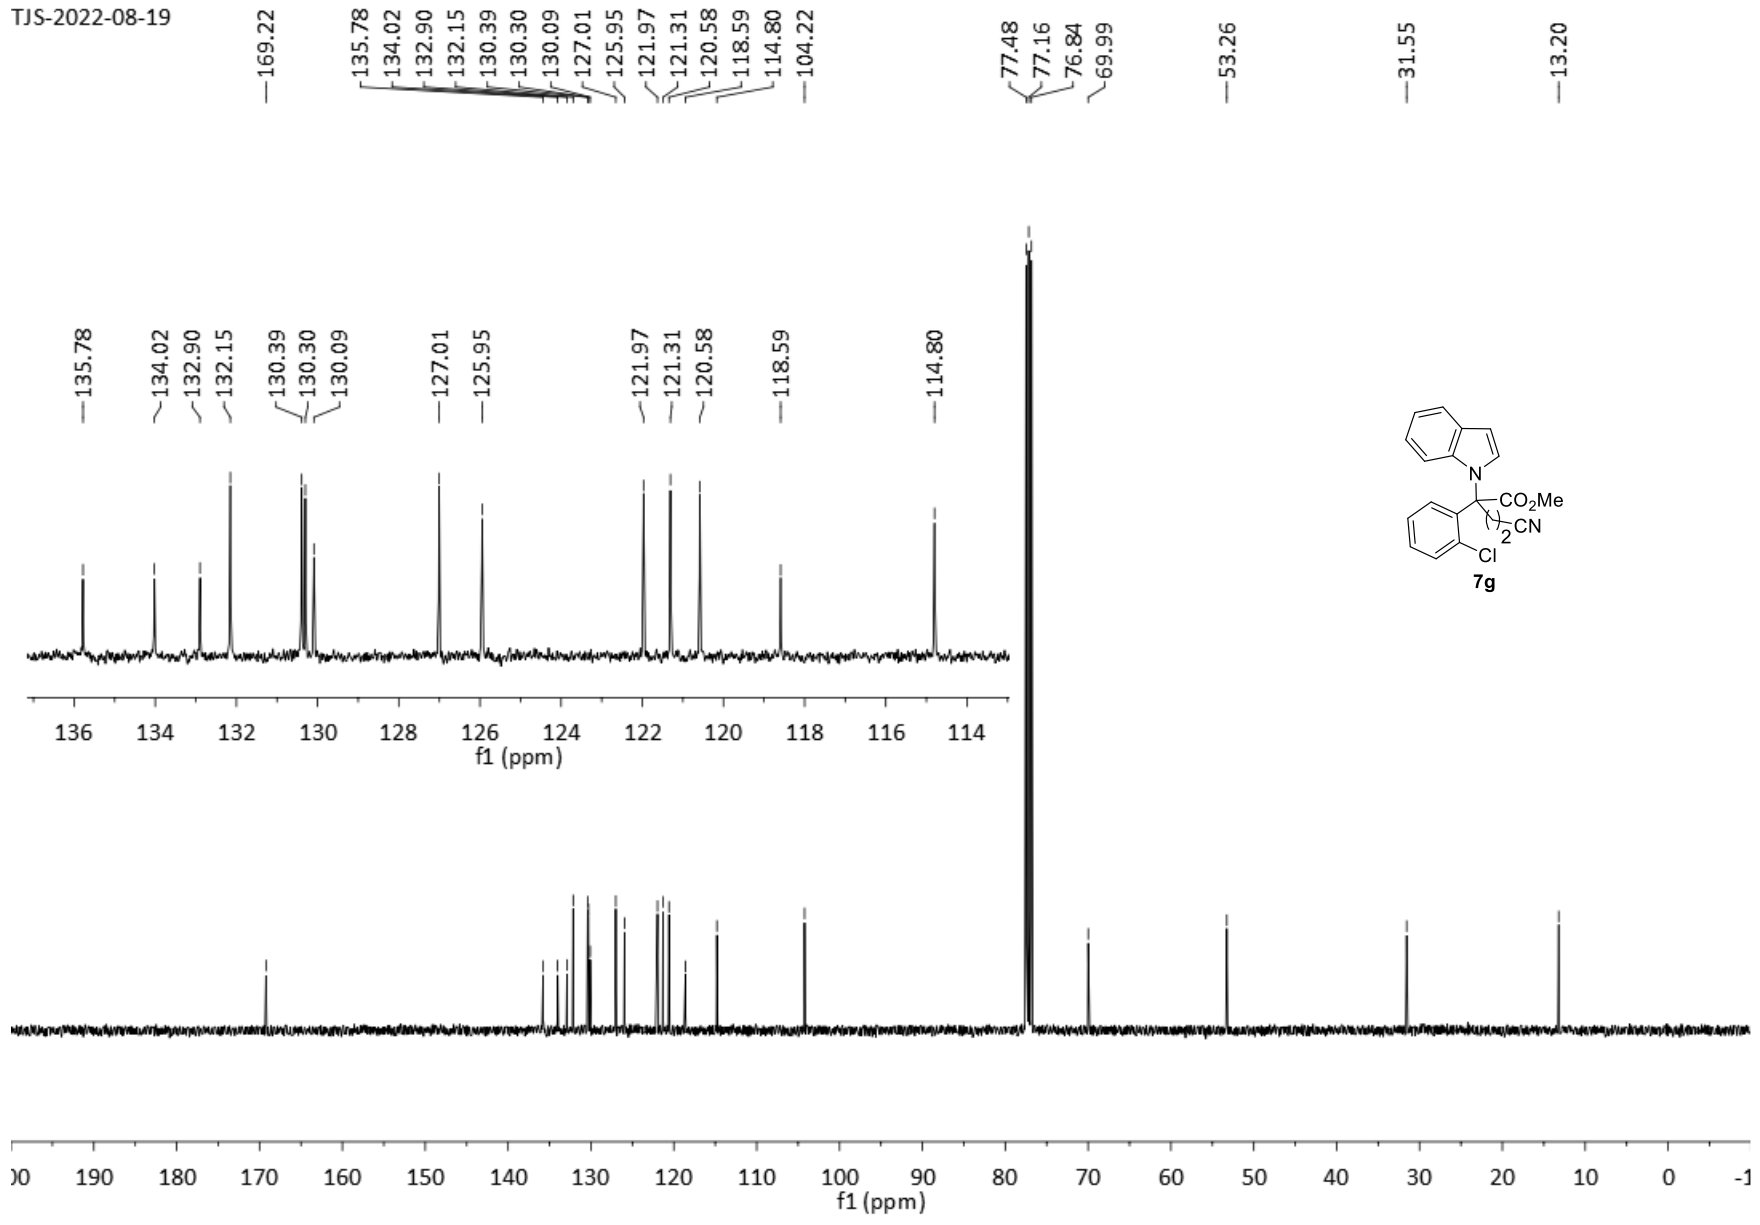

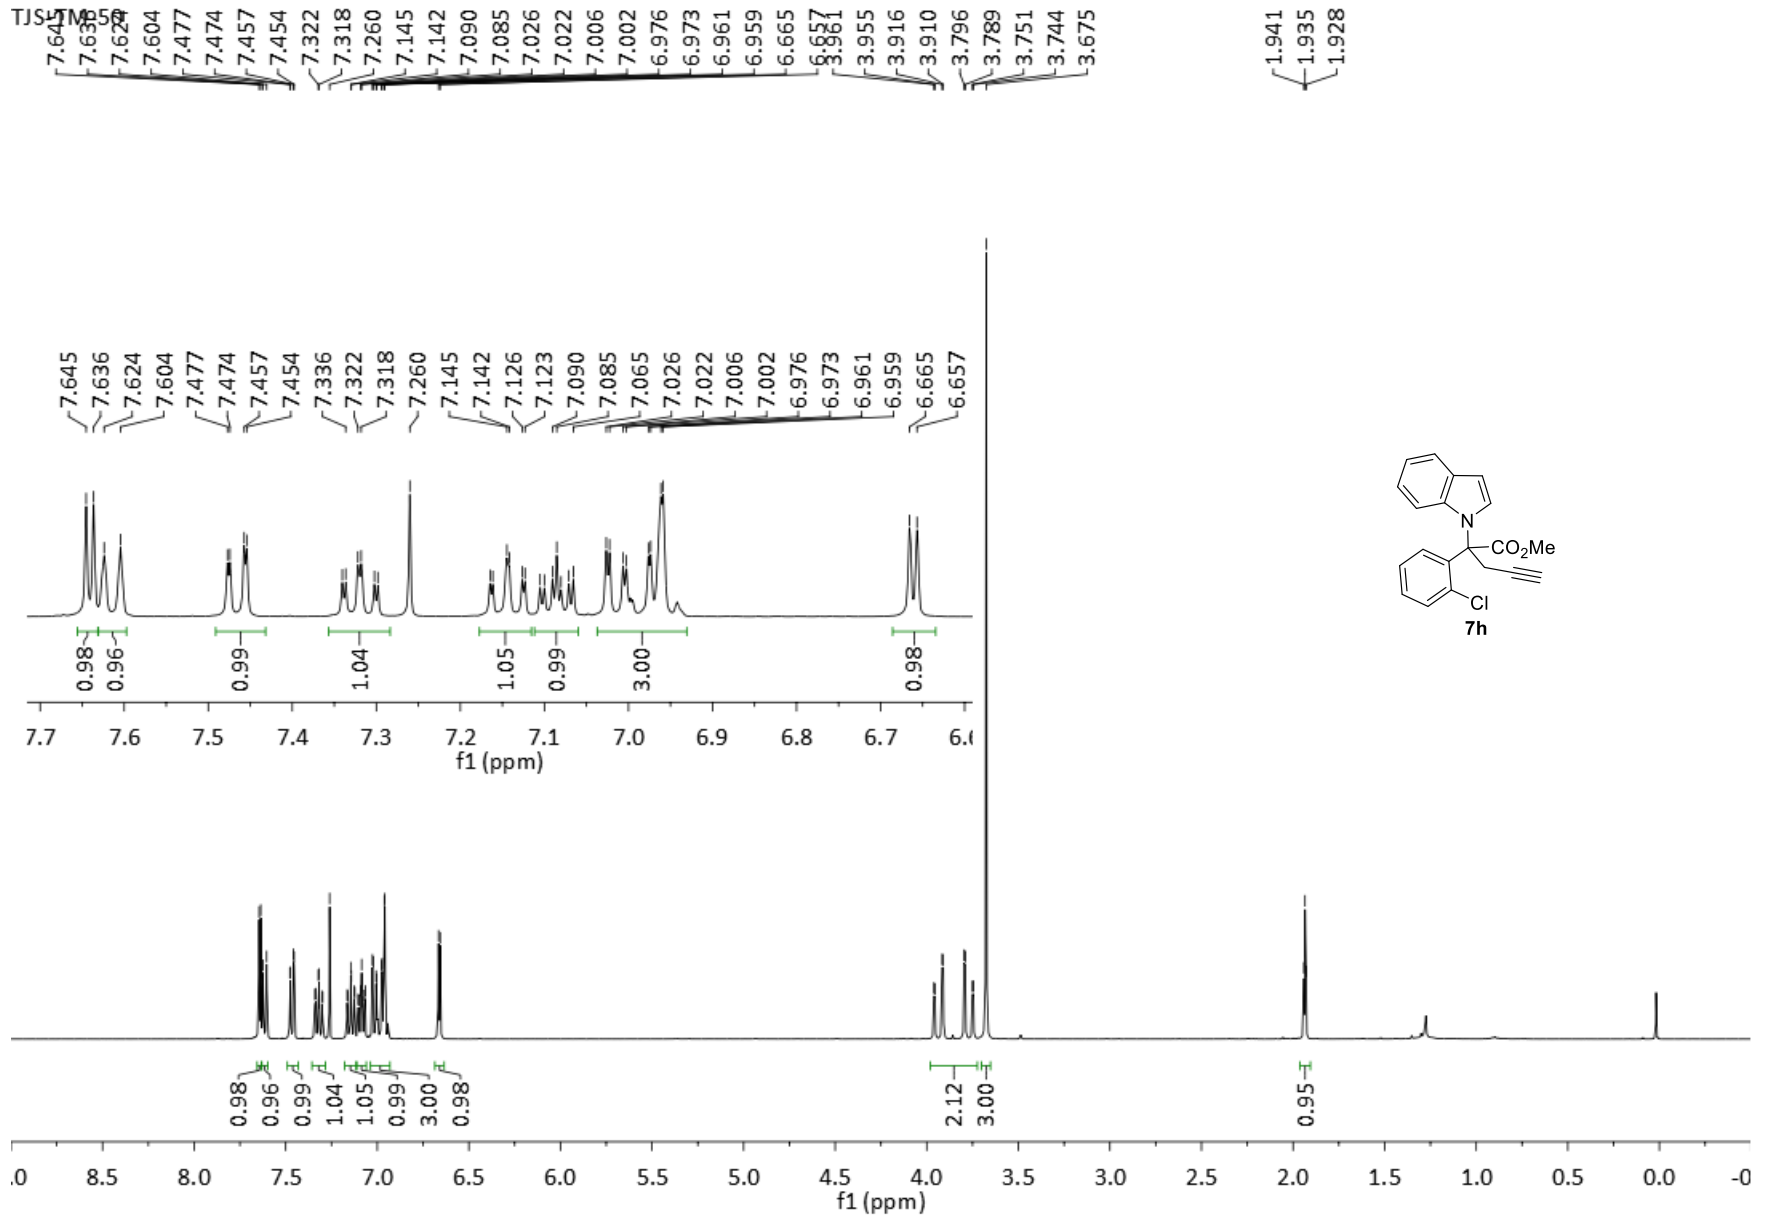

TJS-TM-50

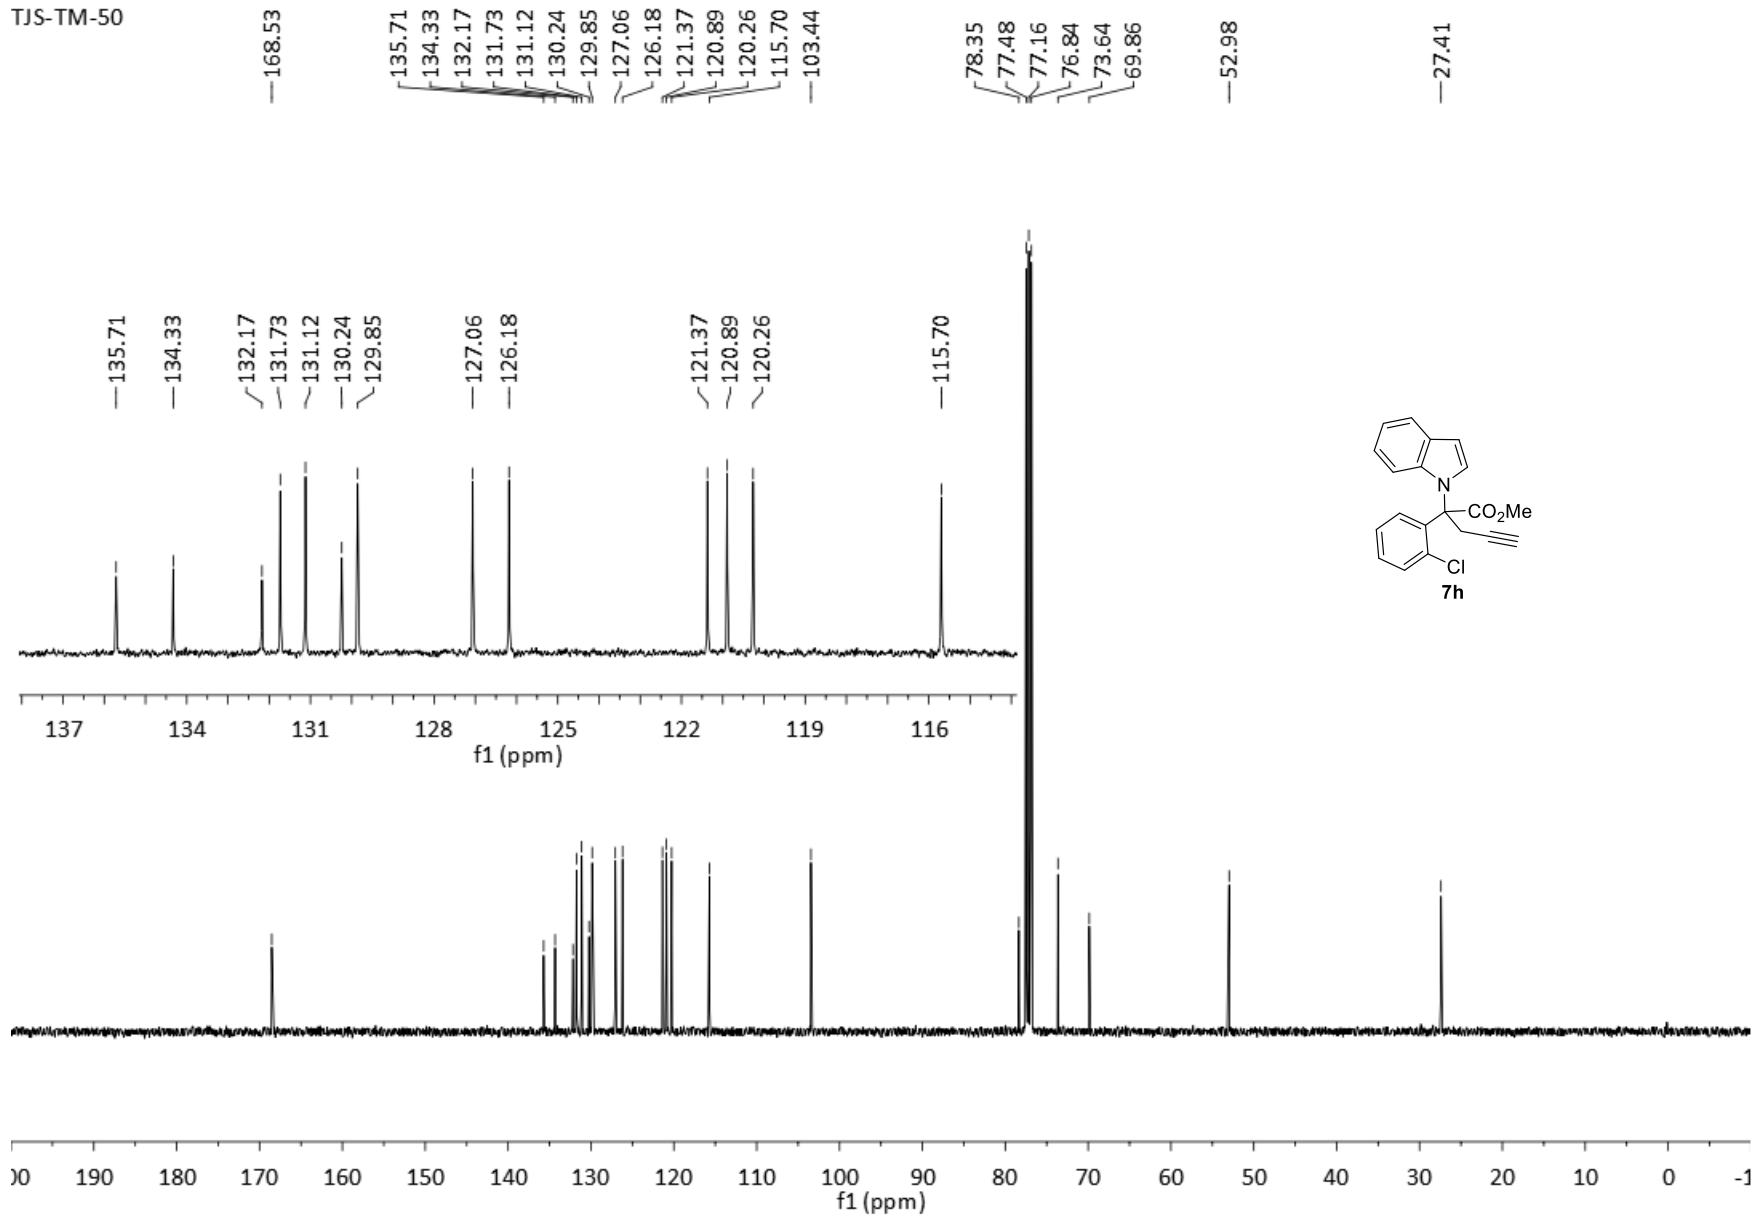



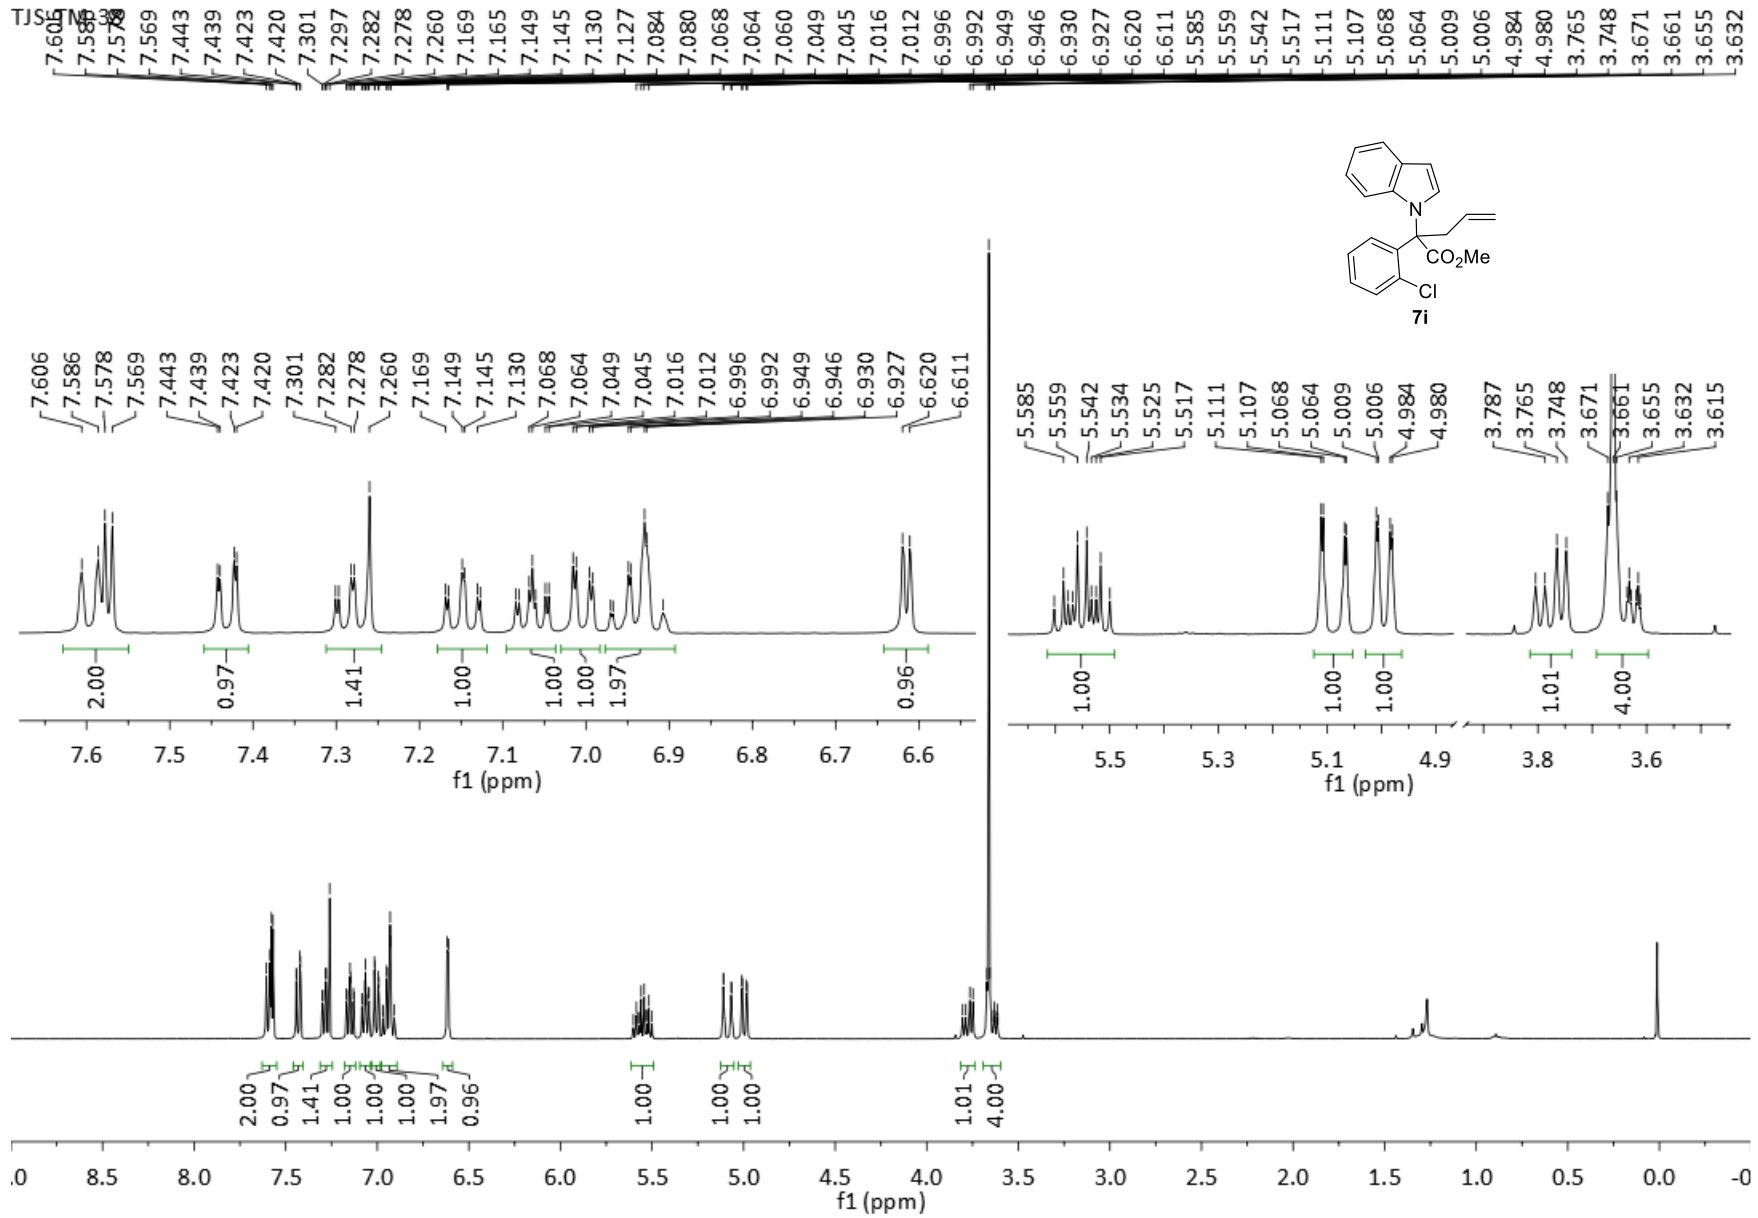

TJS-TM-38

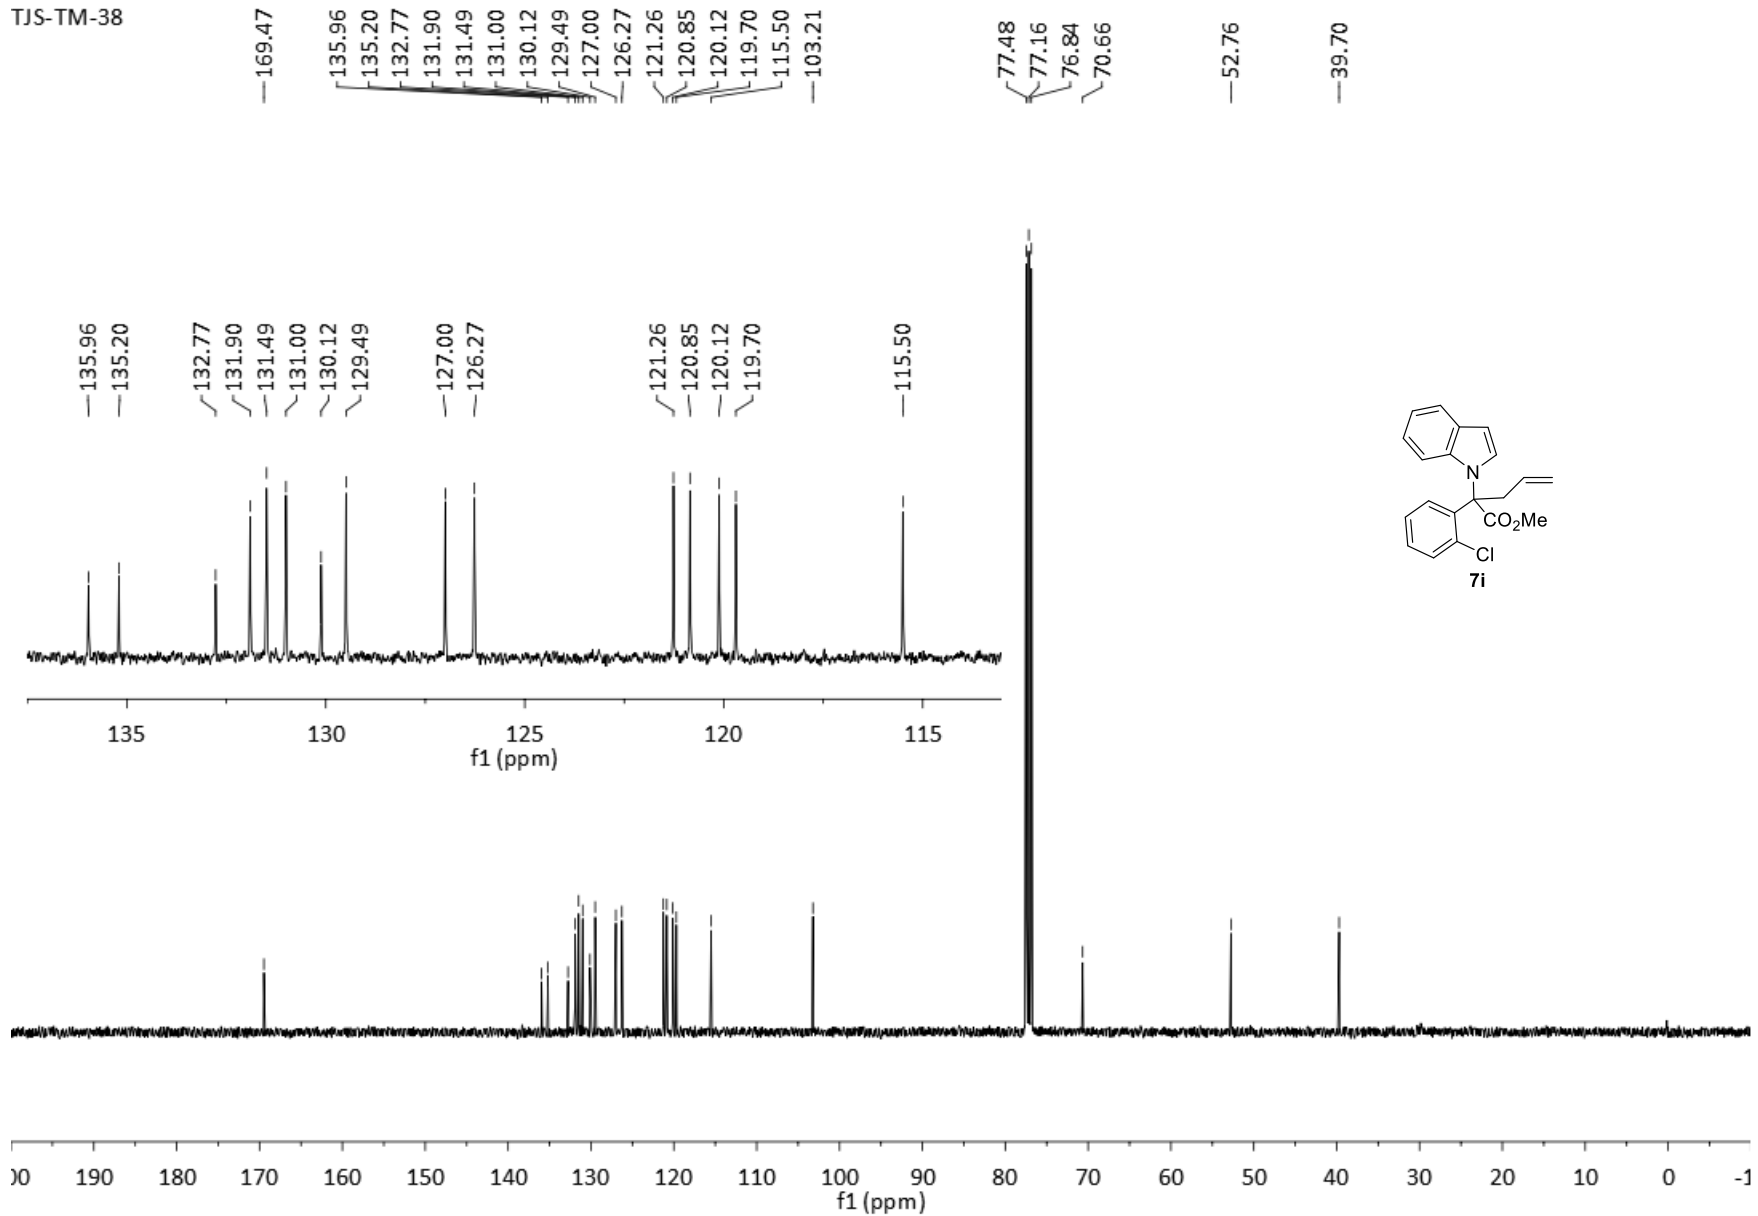

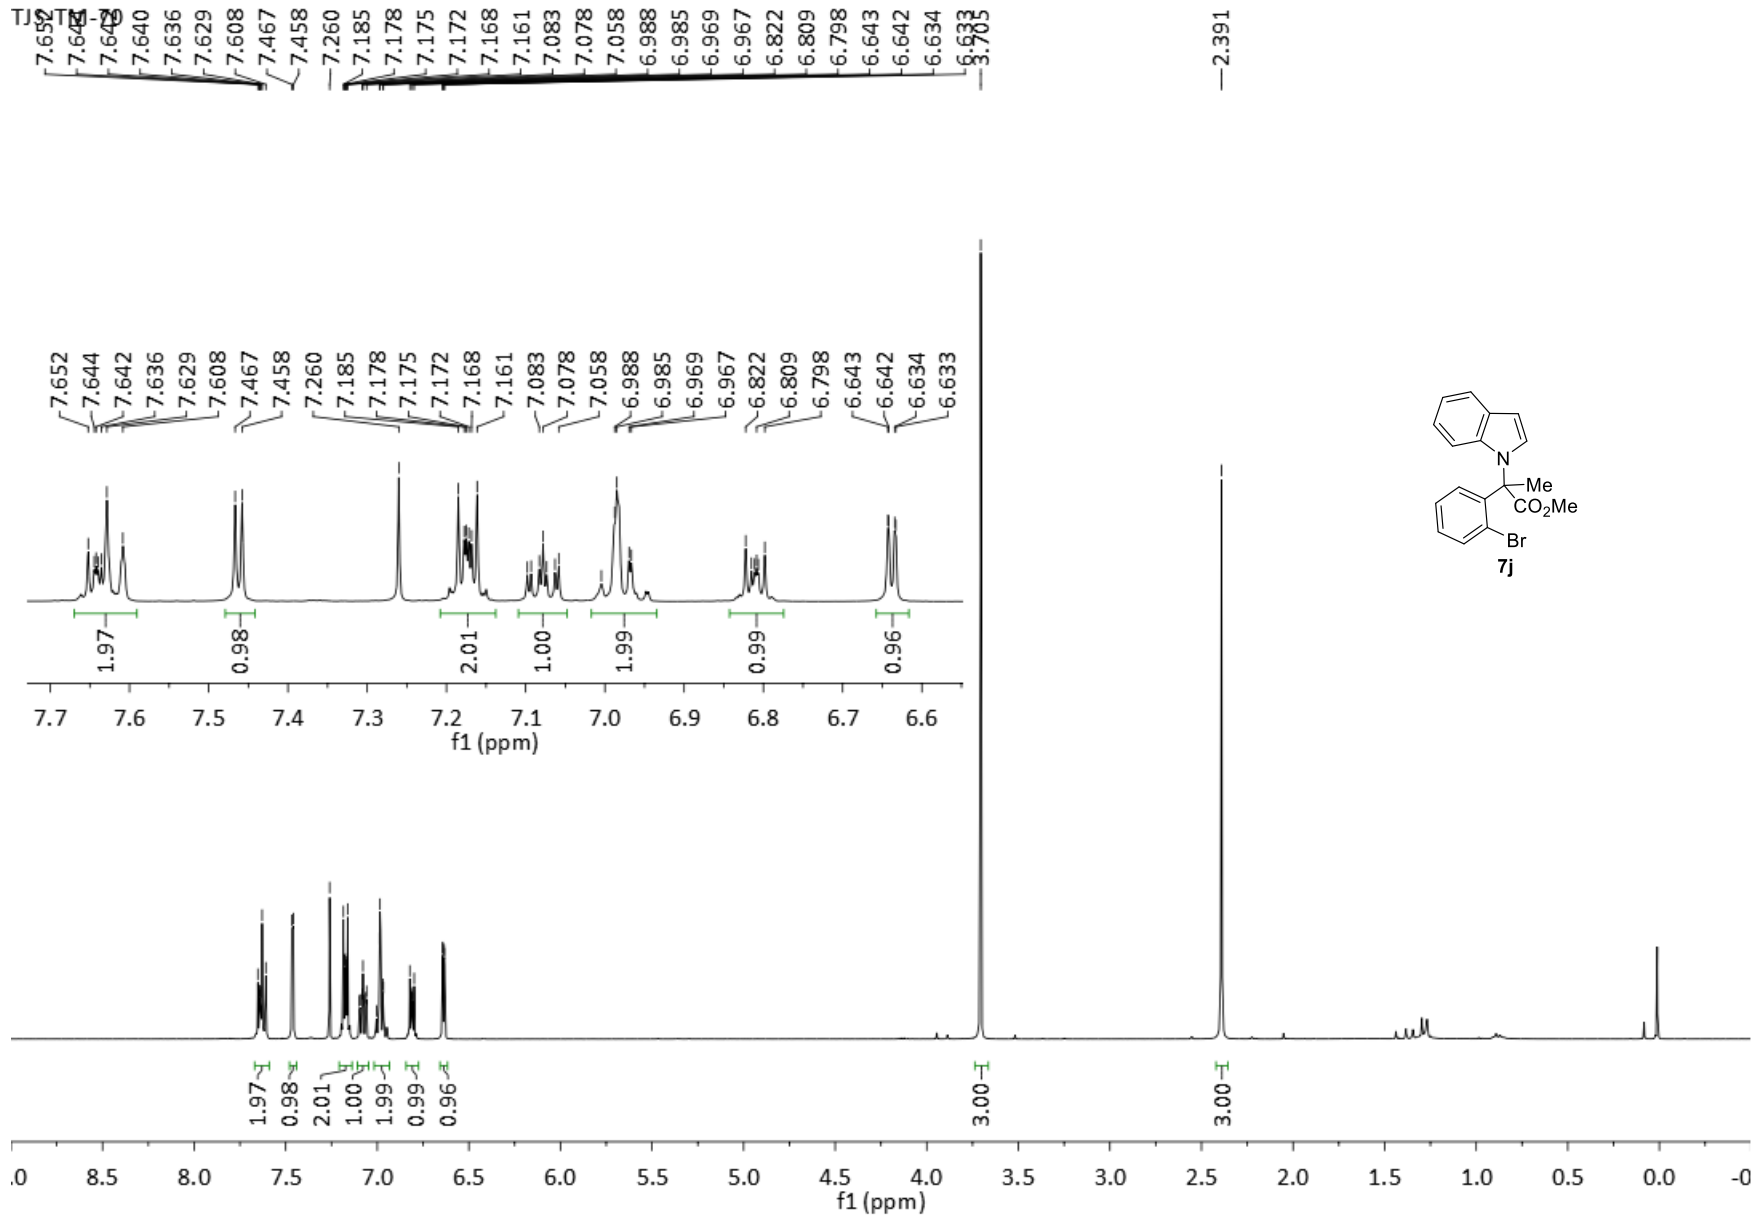

TJS-TM-70

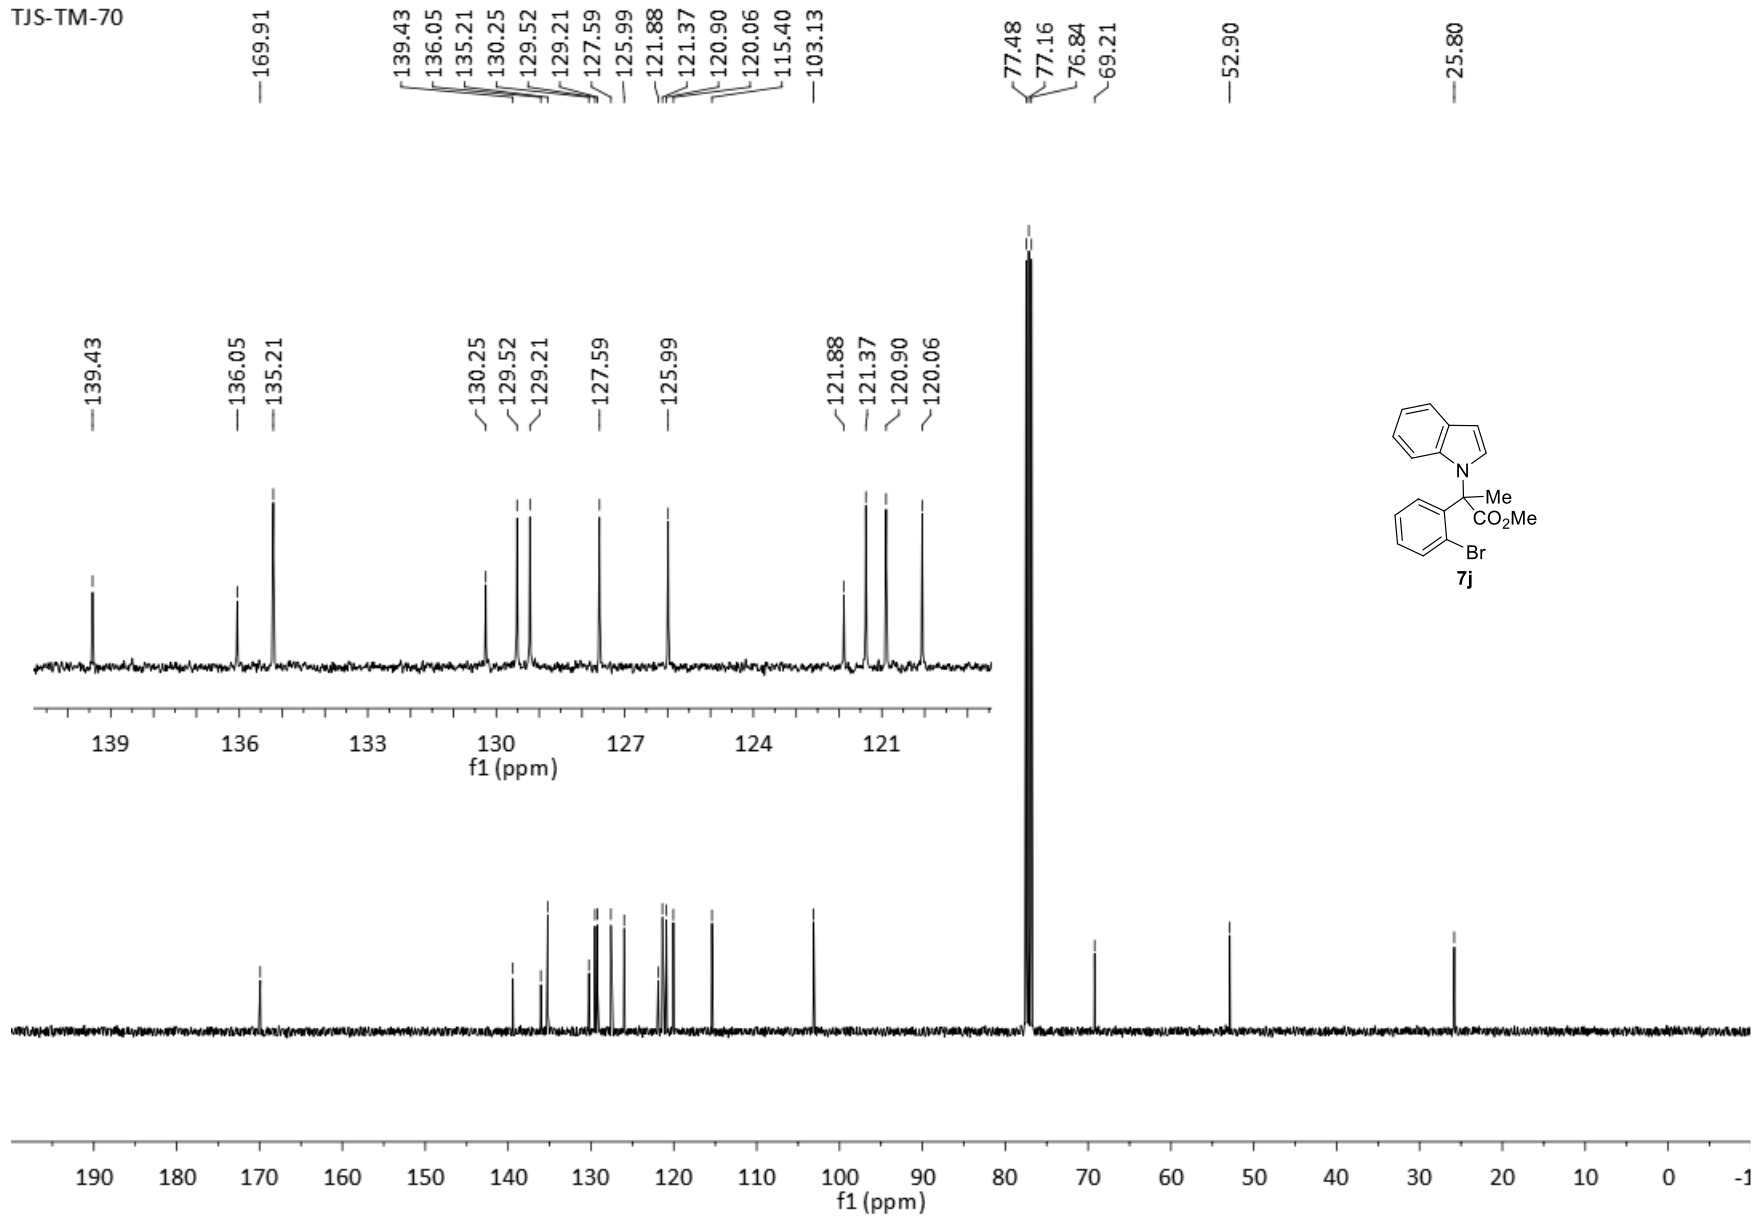

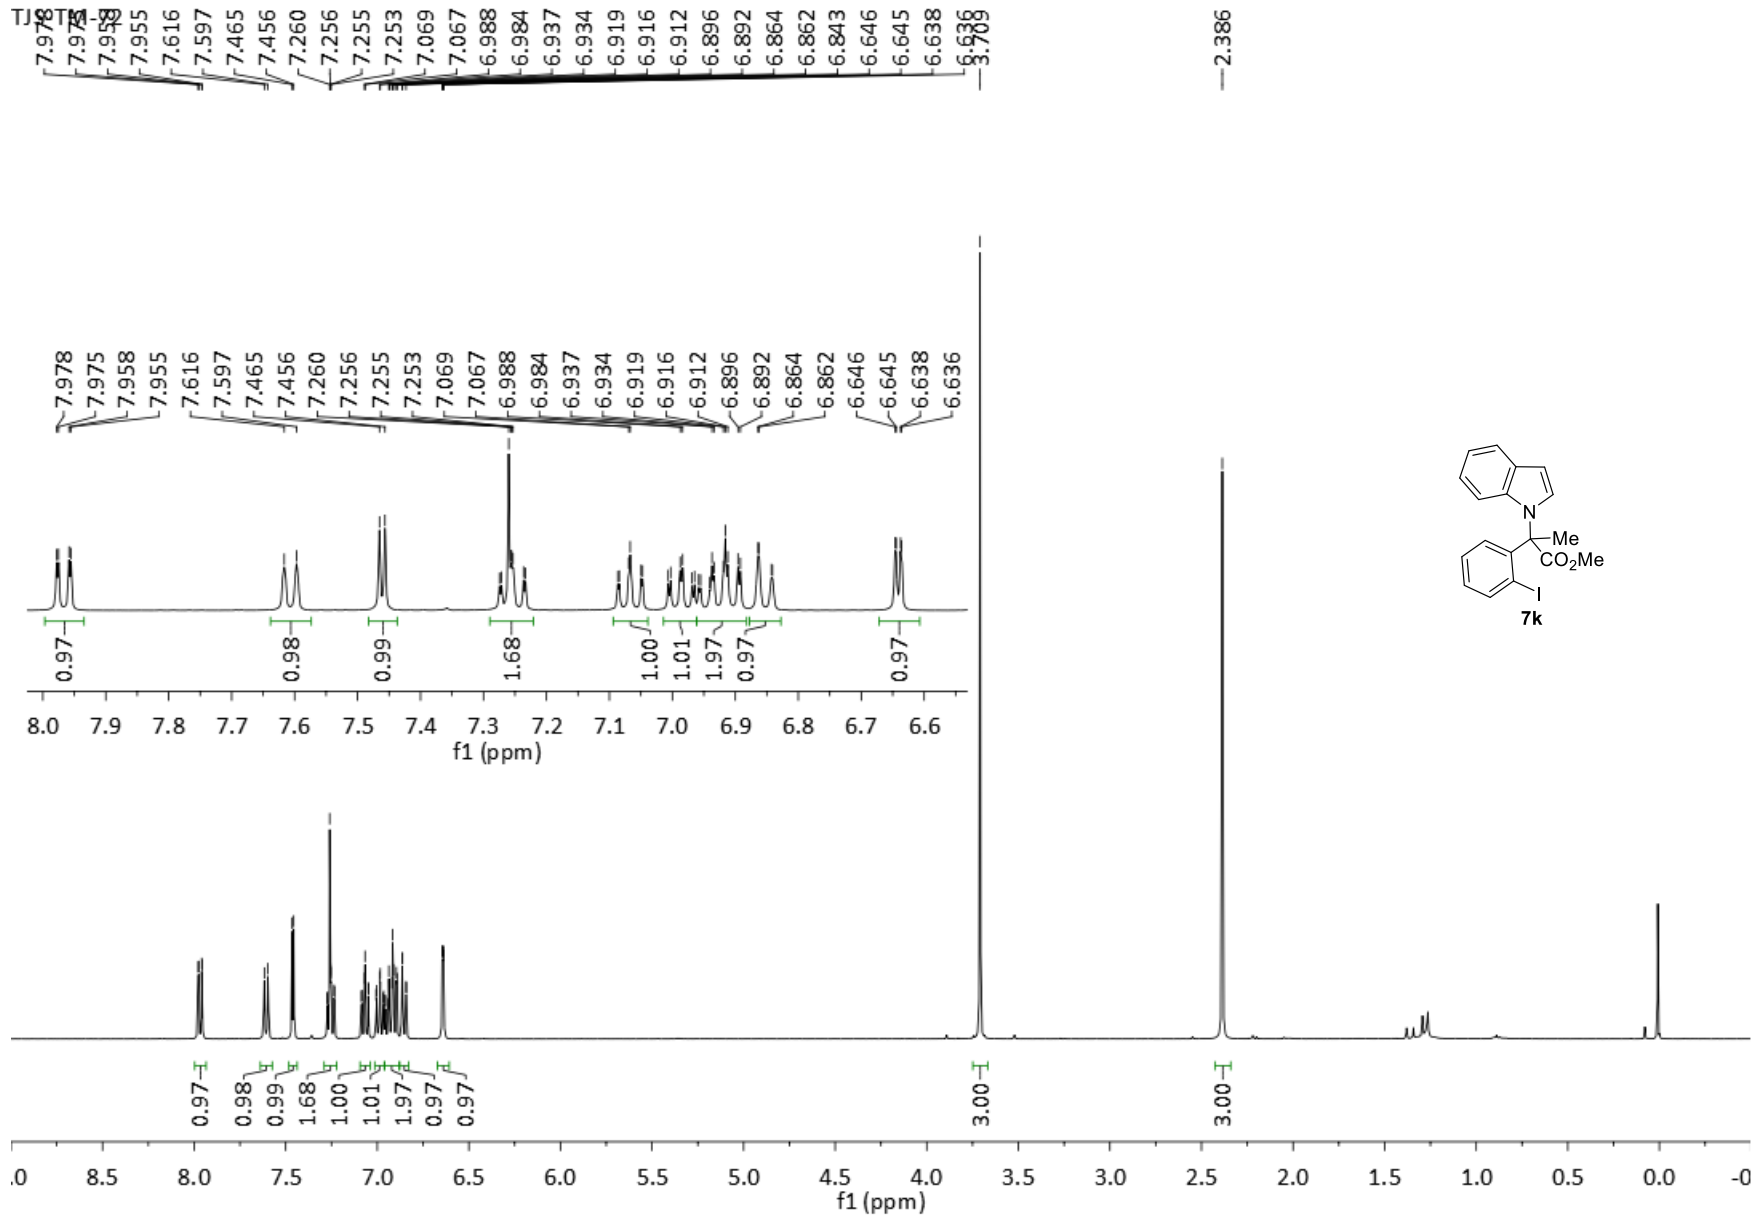

TJS-TM-72

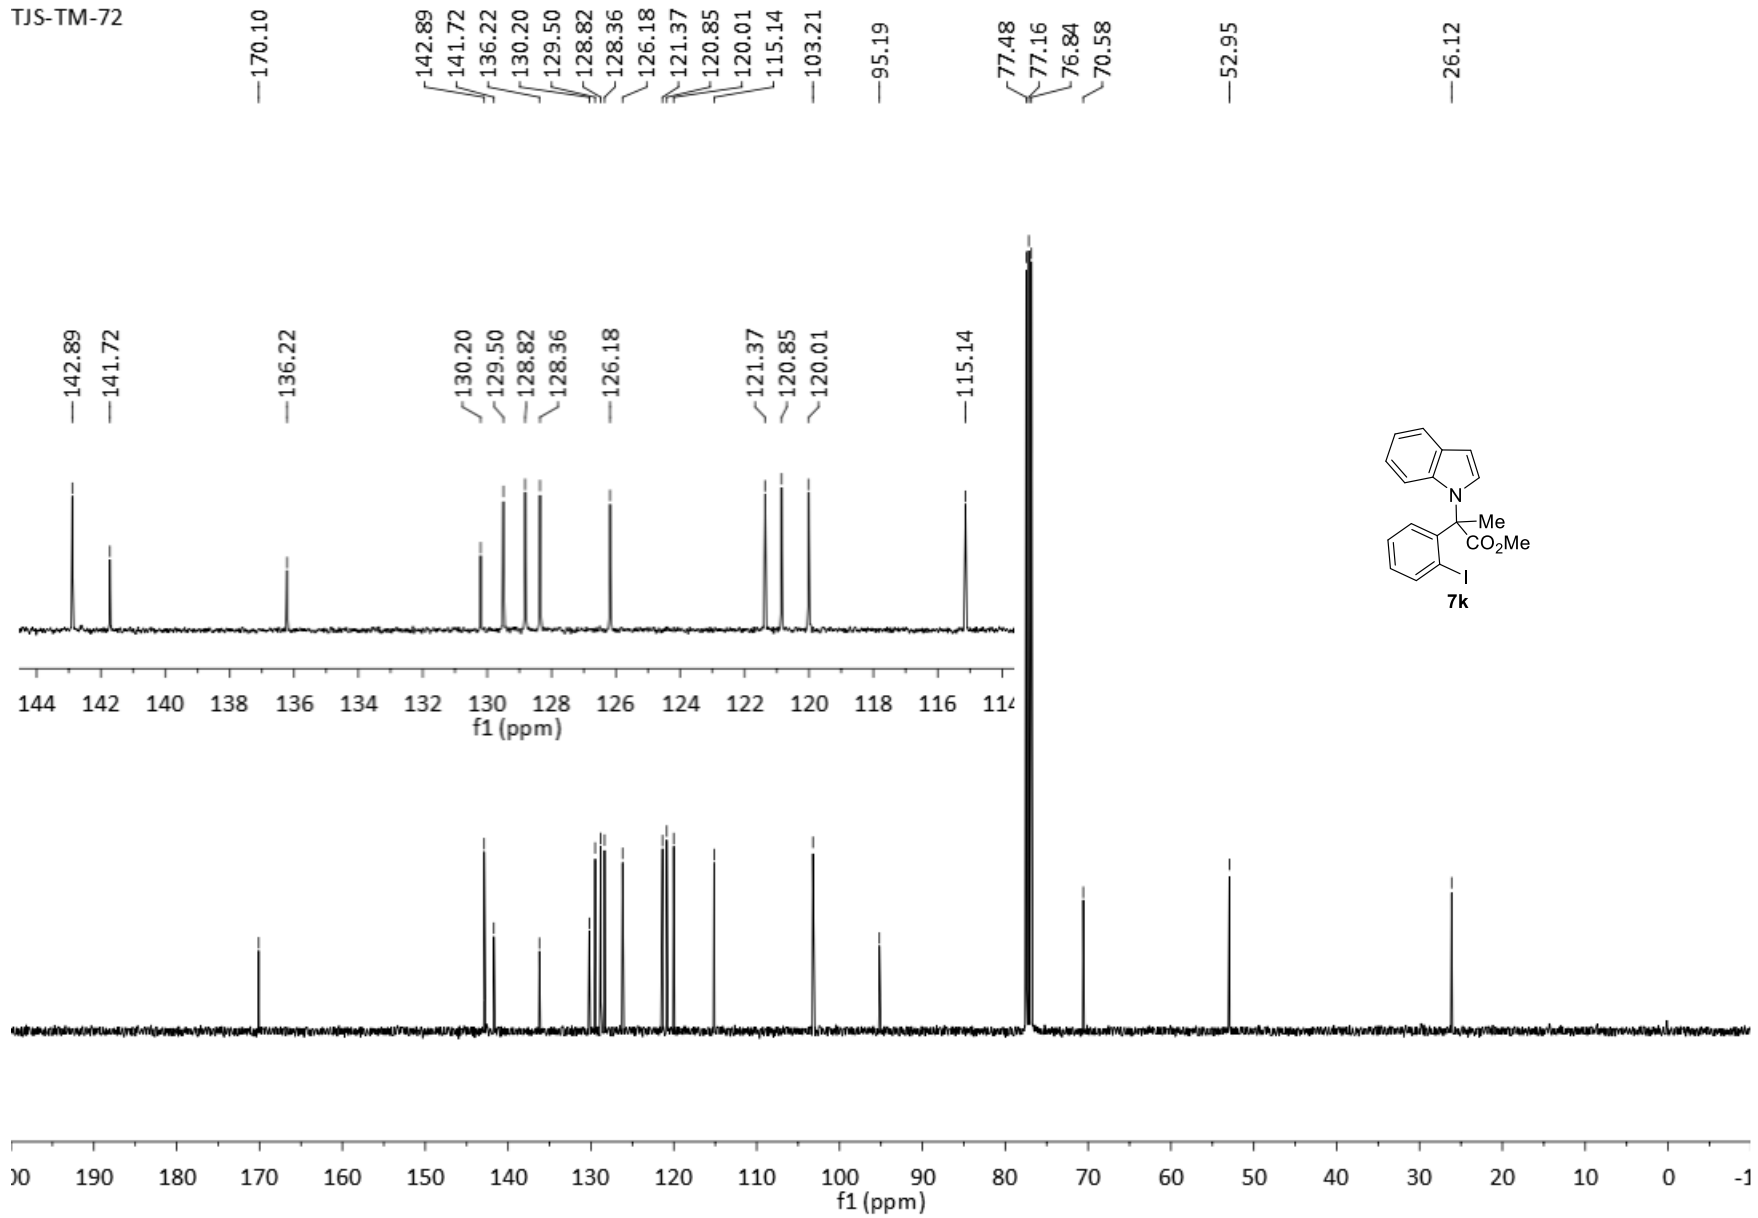

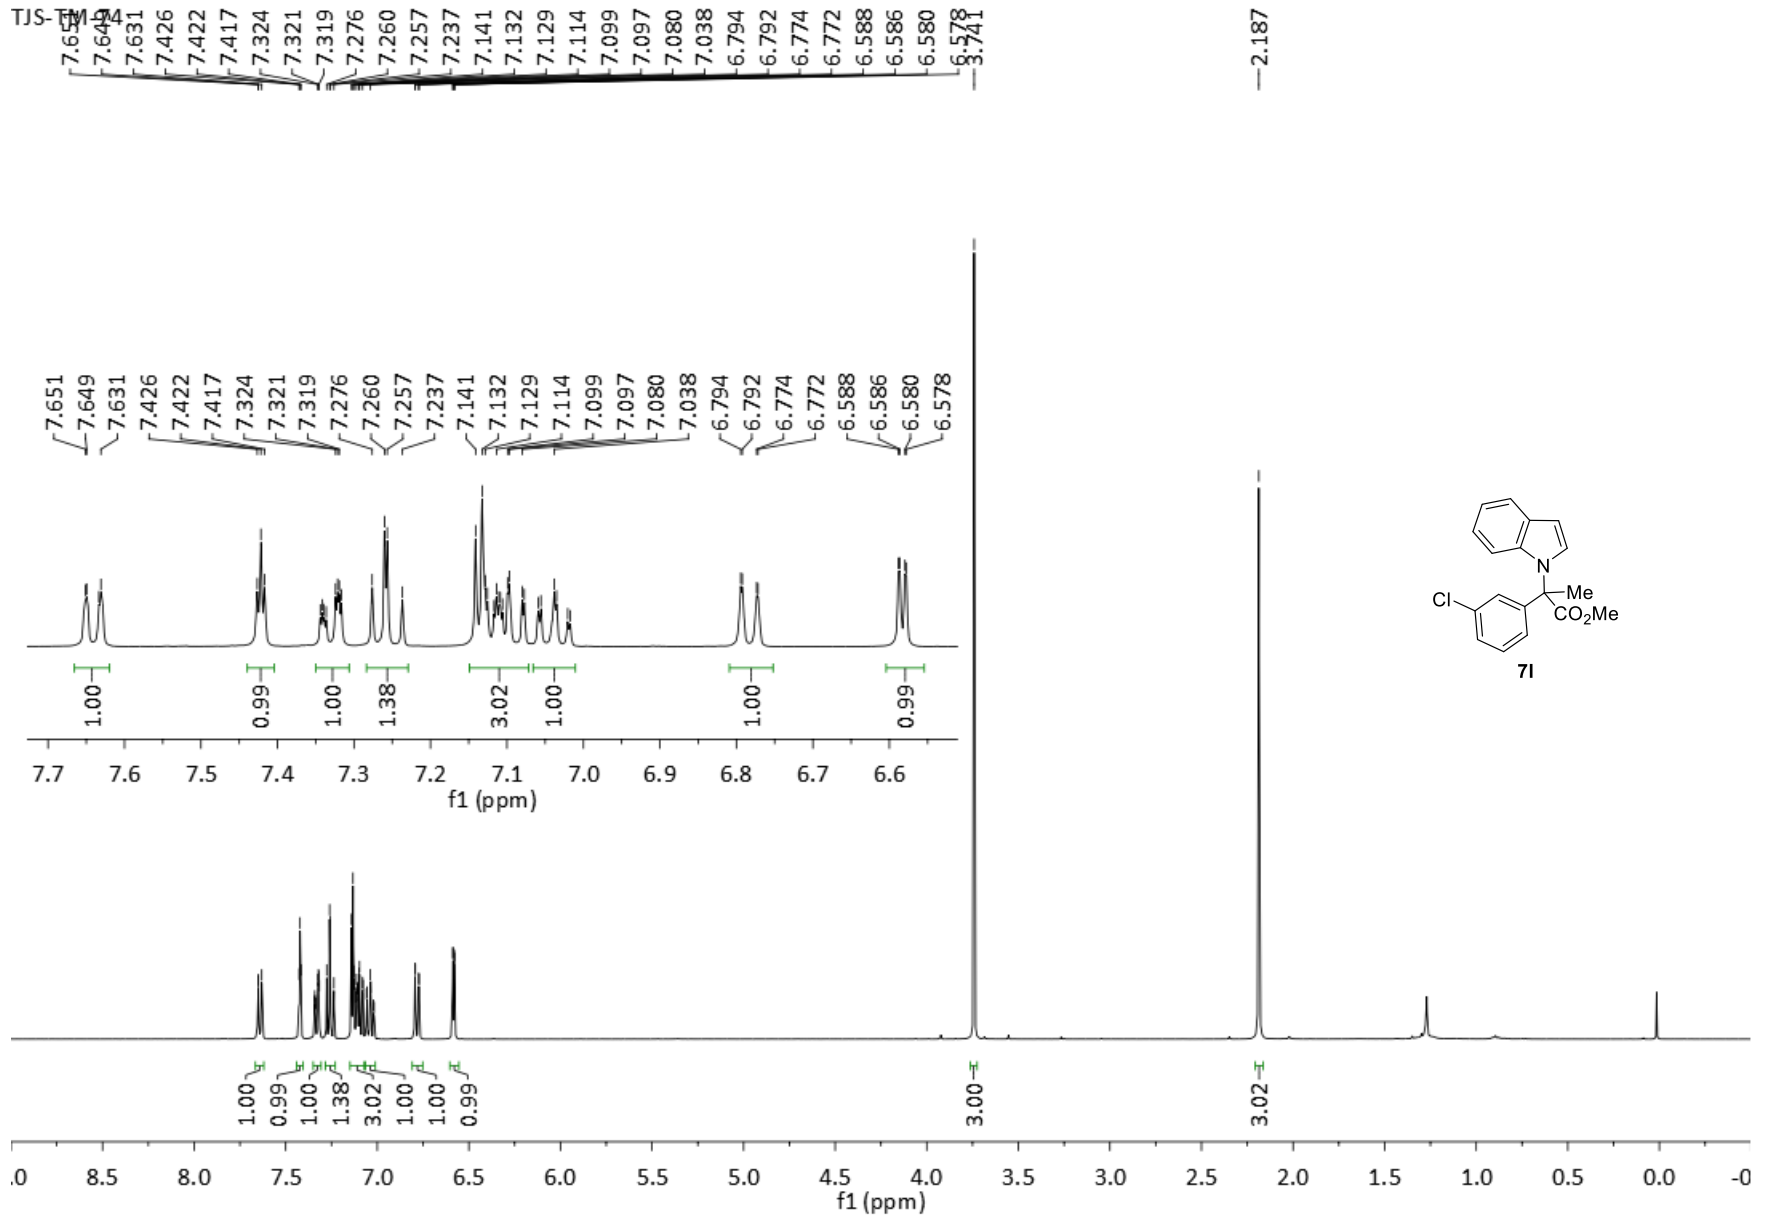

TJS-TM-74

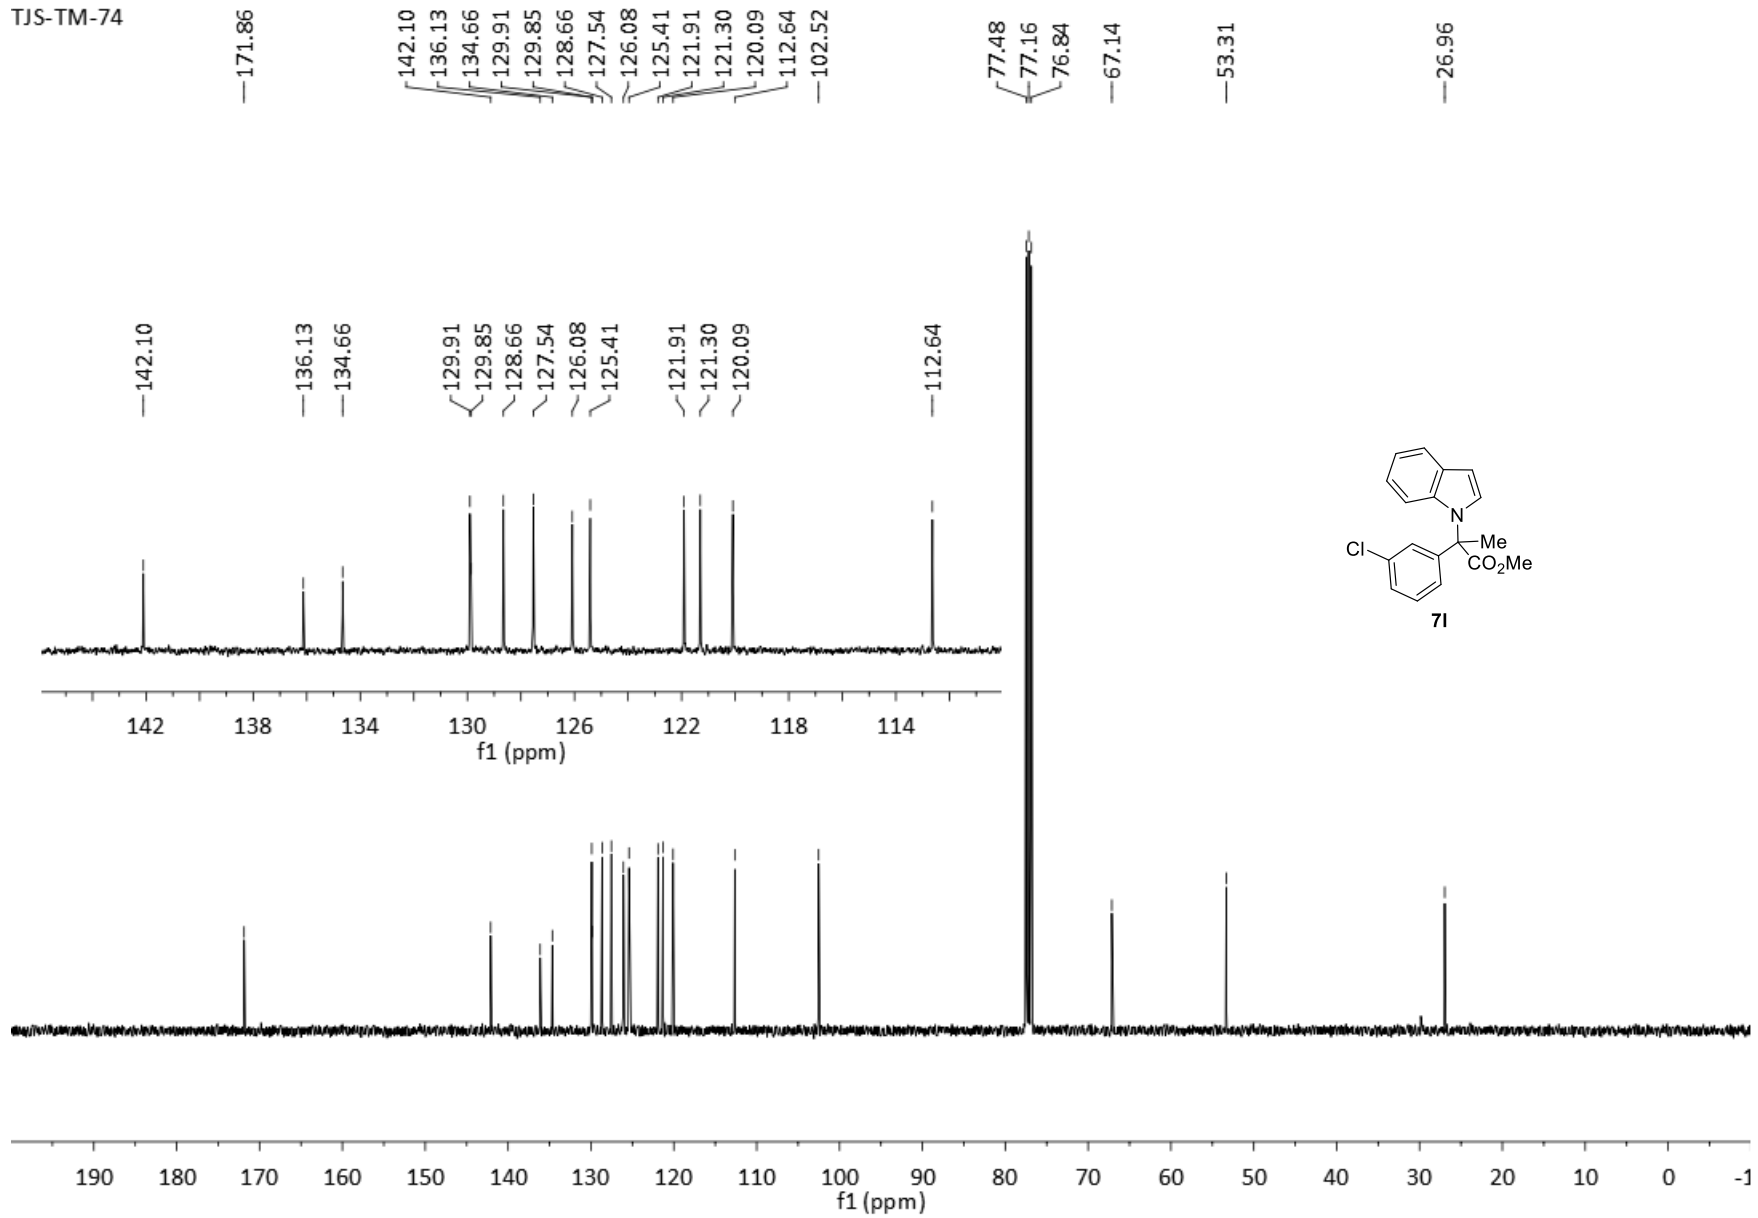



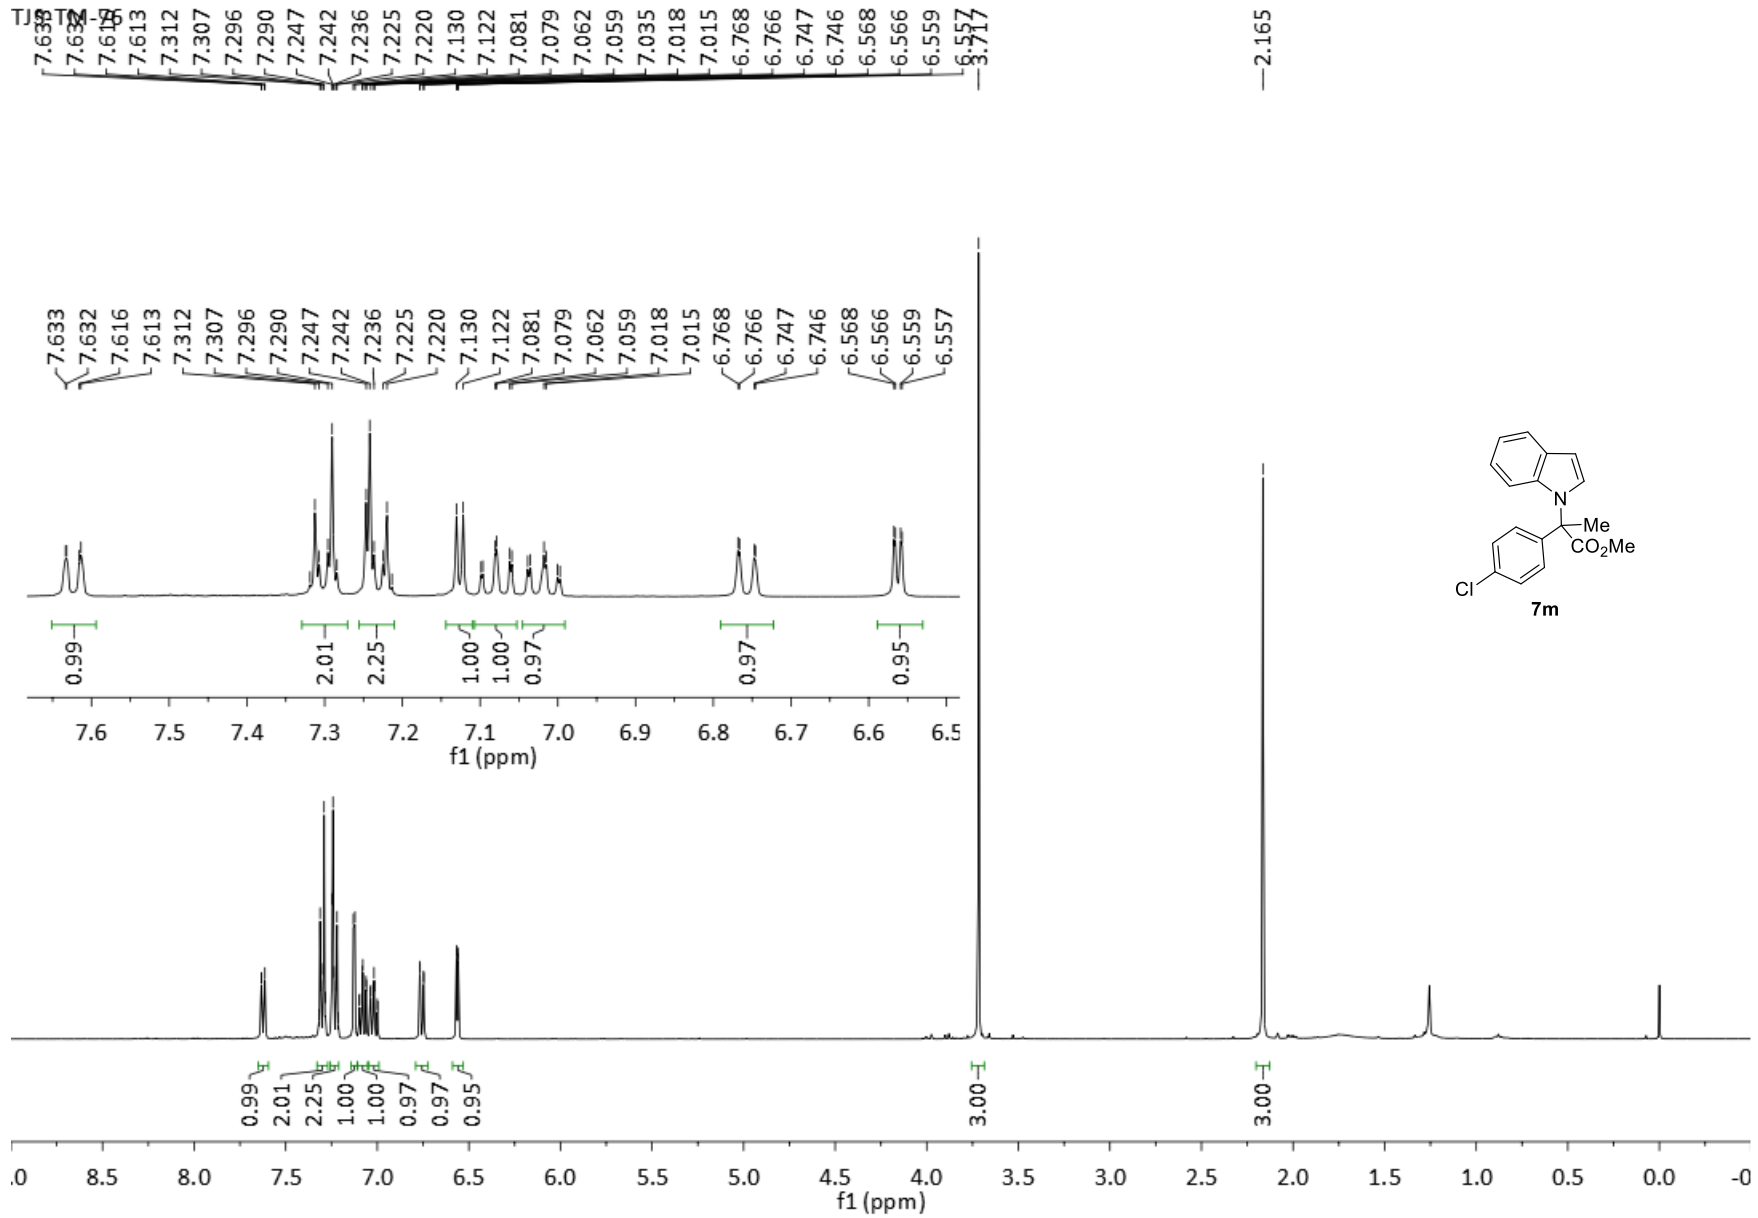

TJS-TM-76

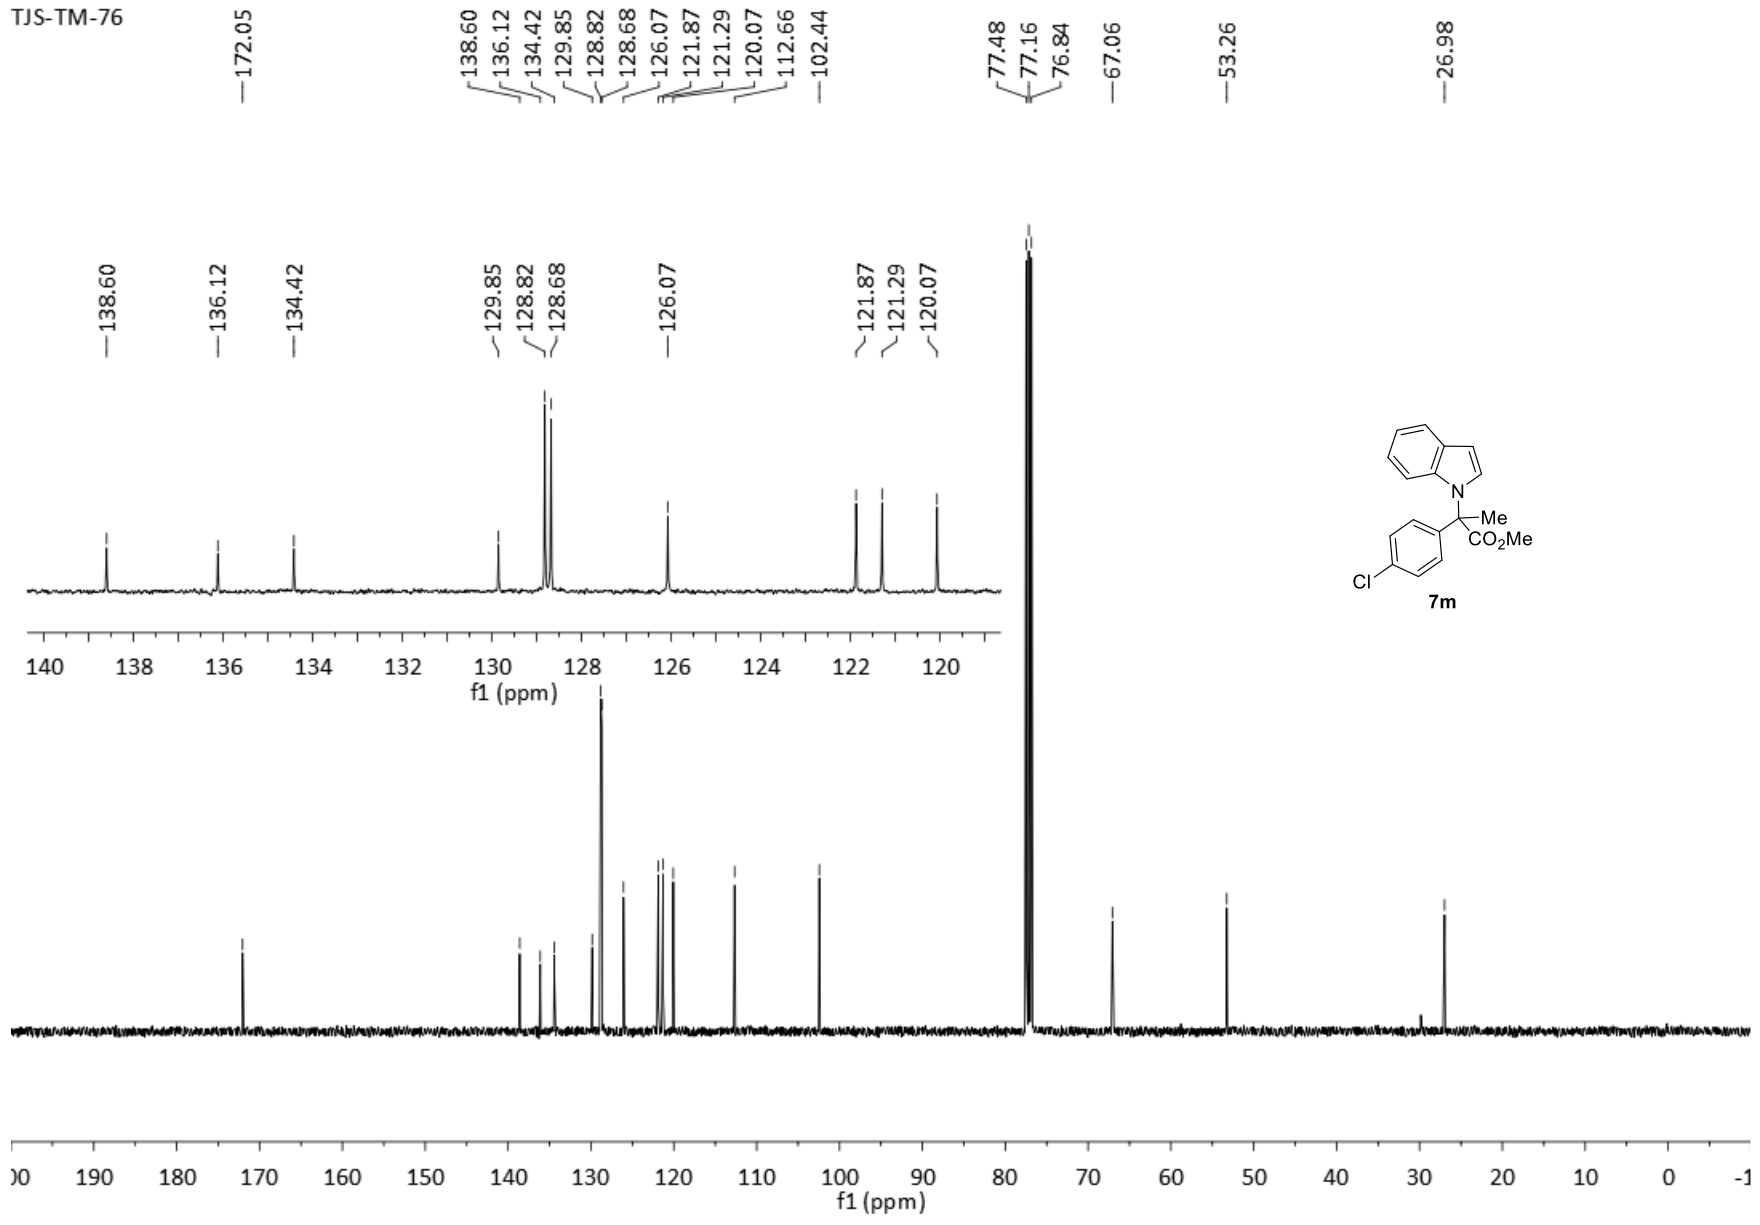

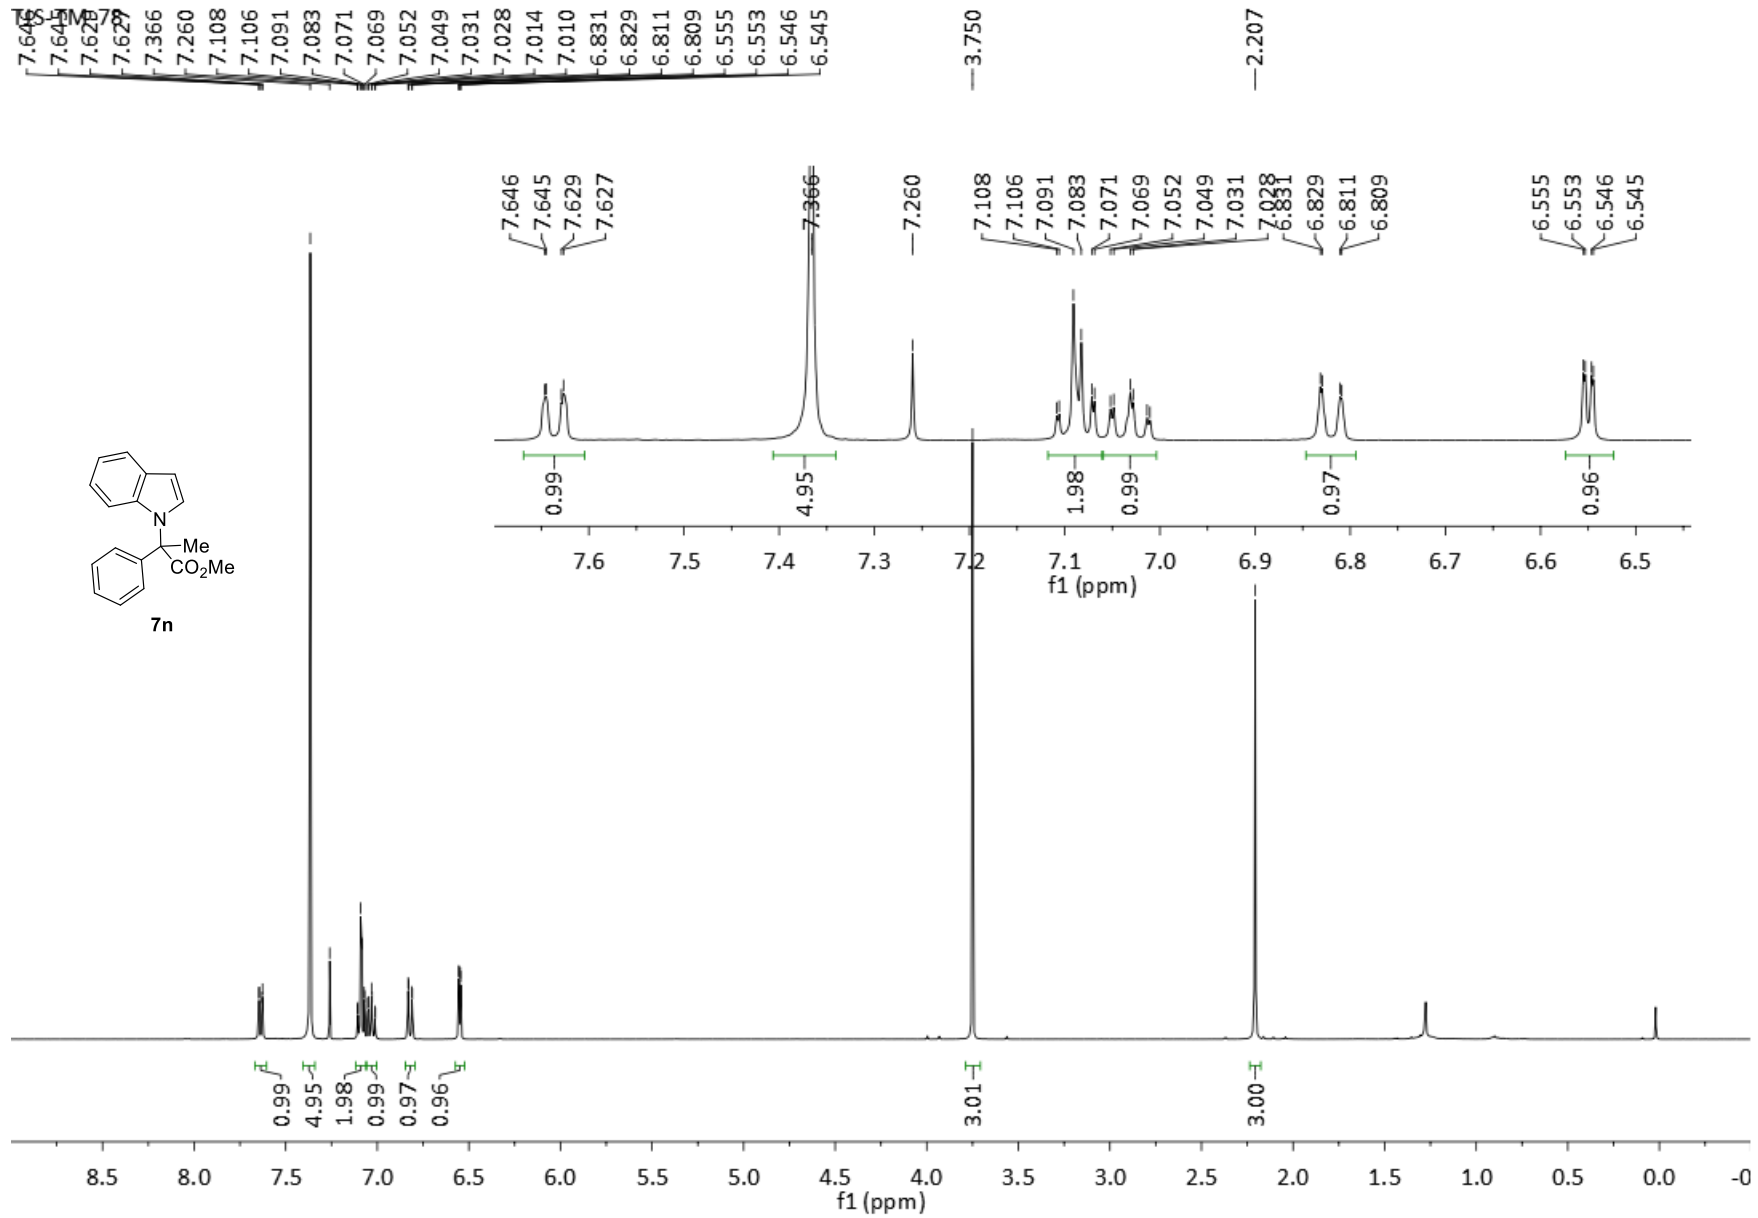

TJS-TM-78

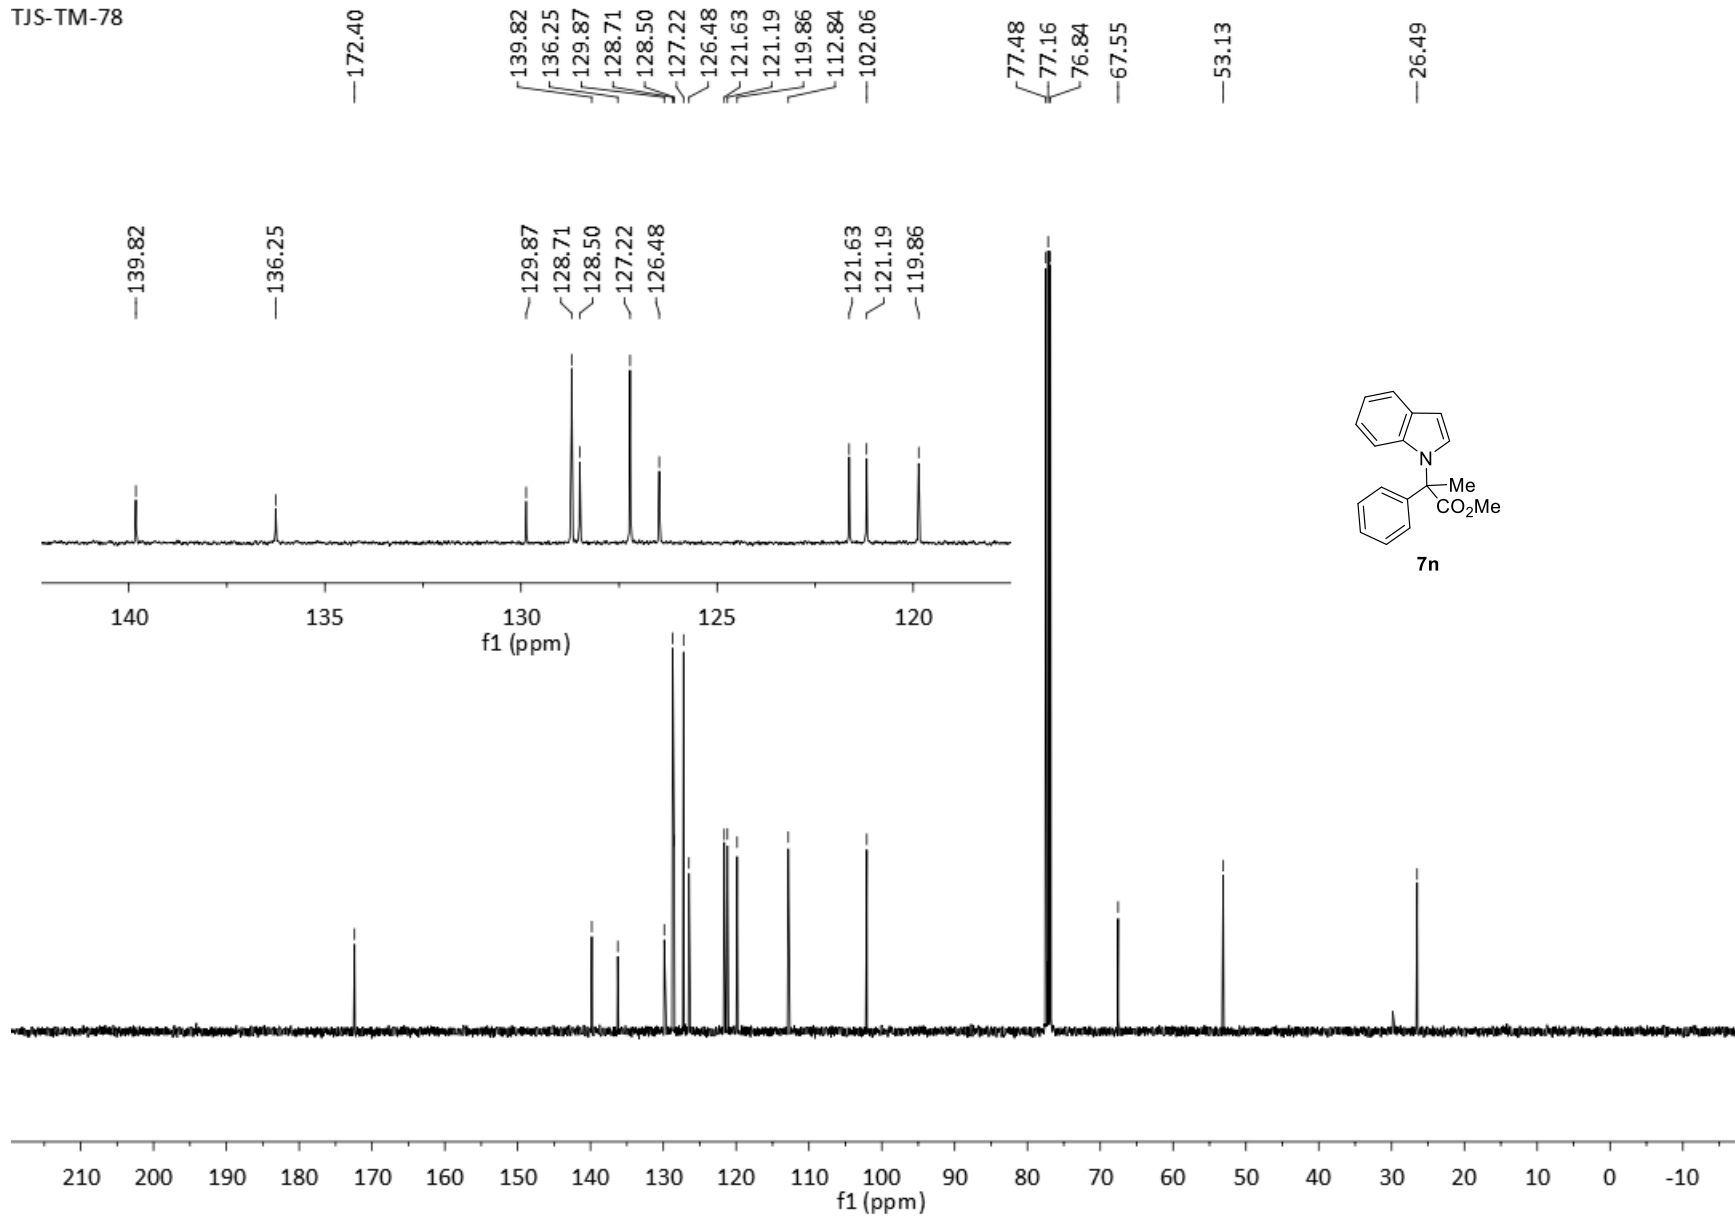

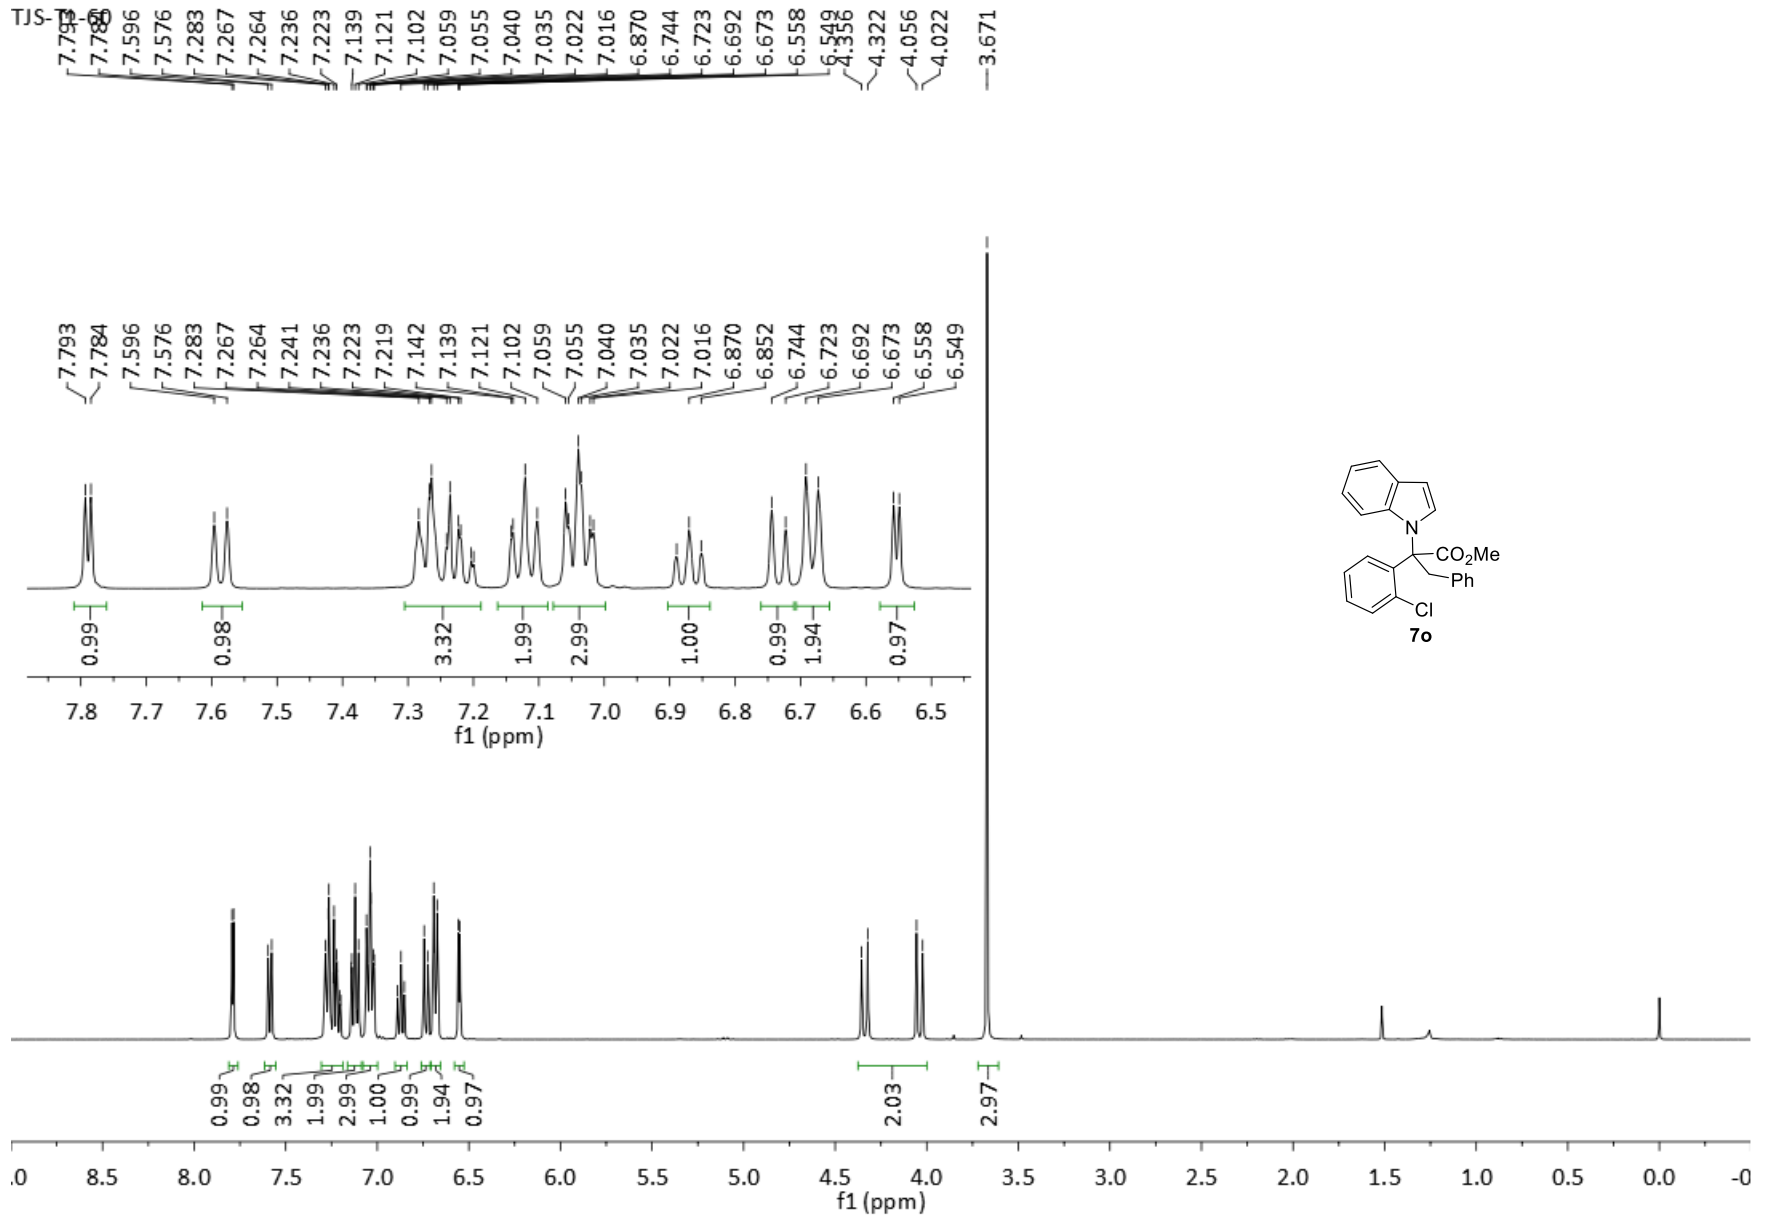

TJS-TL-60

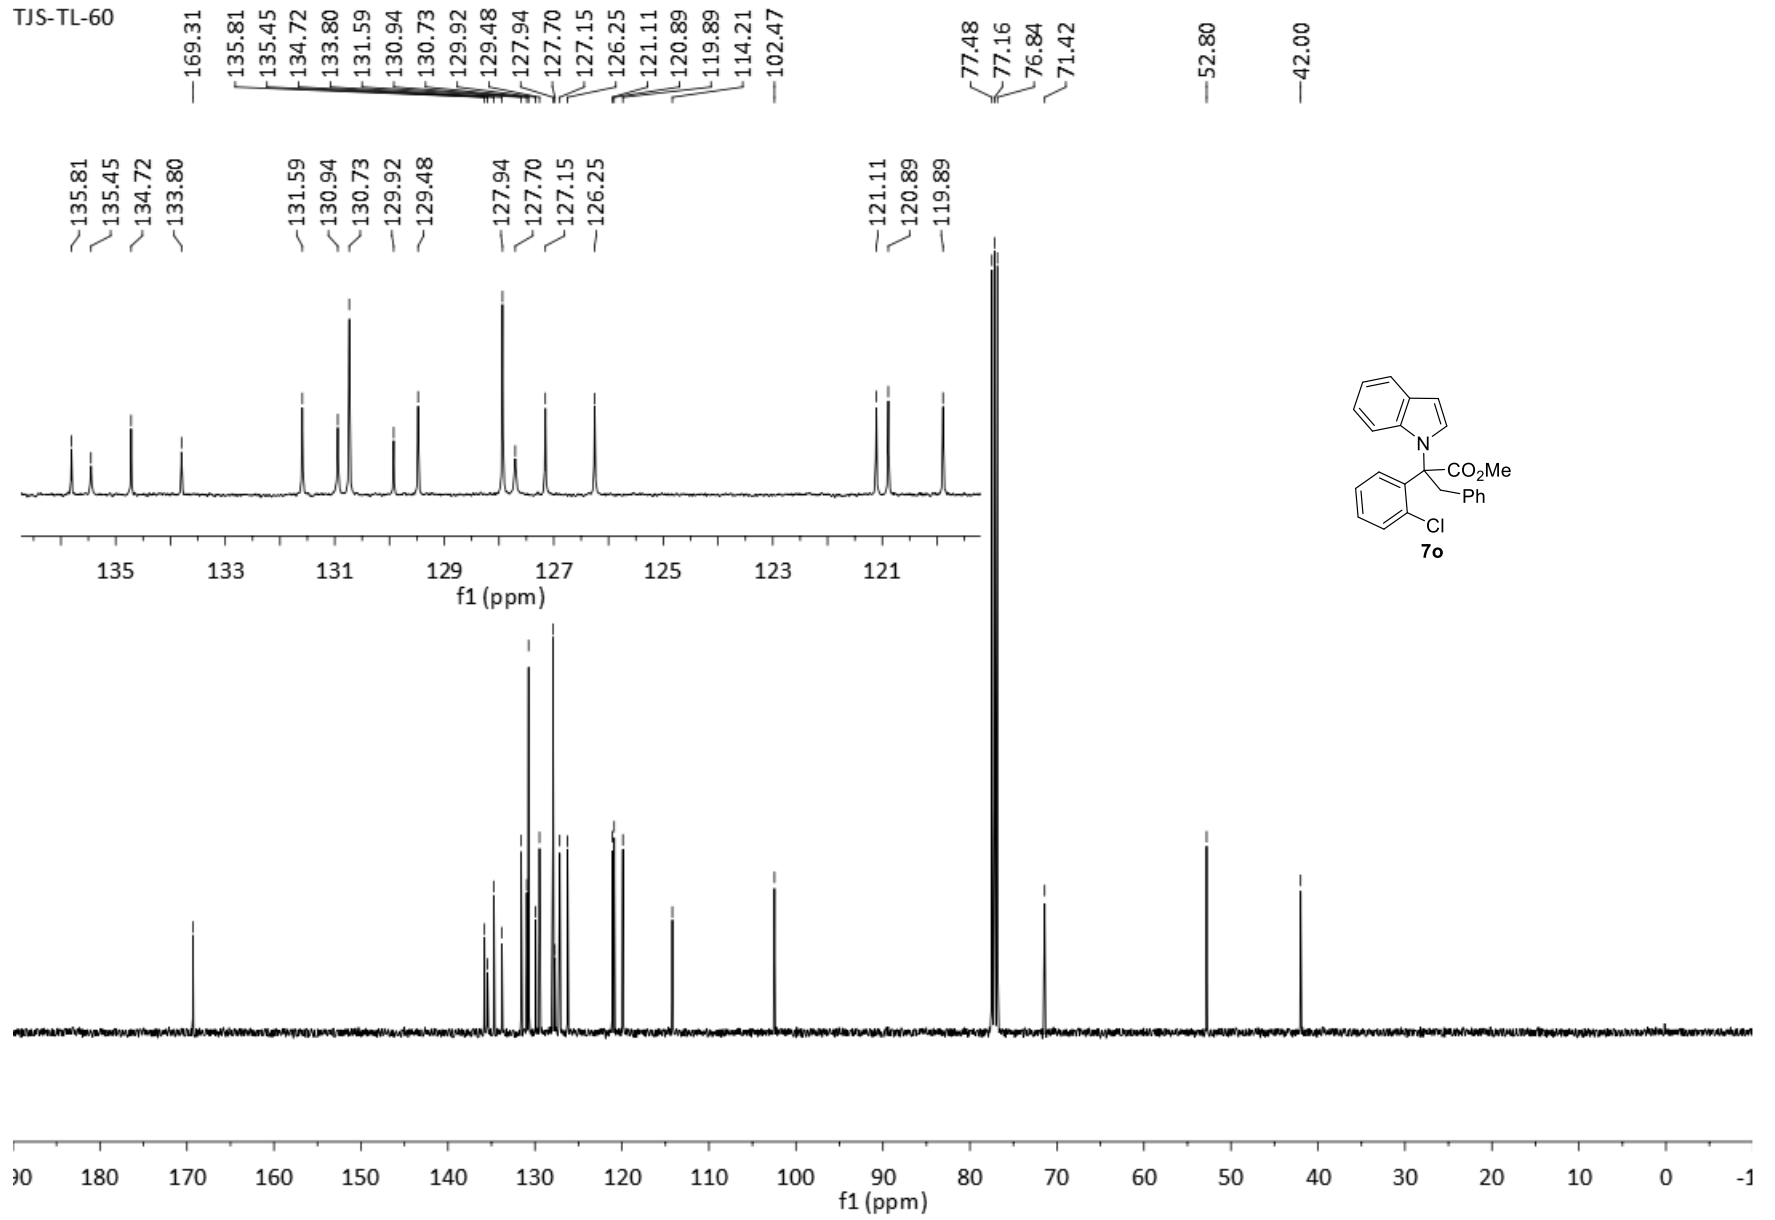

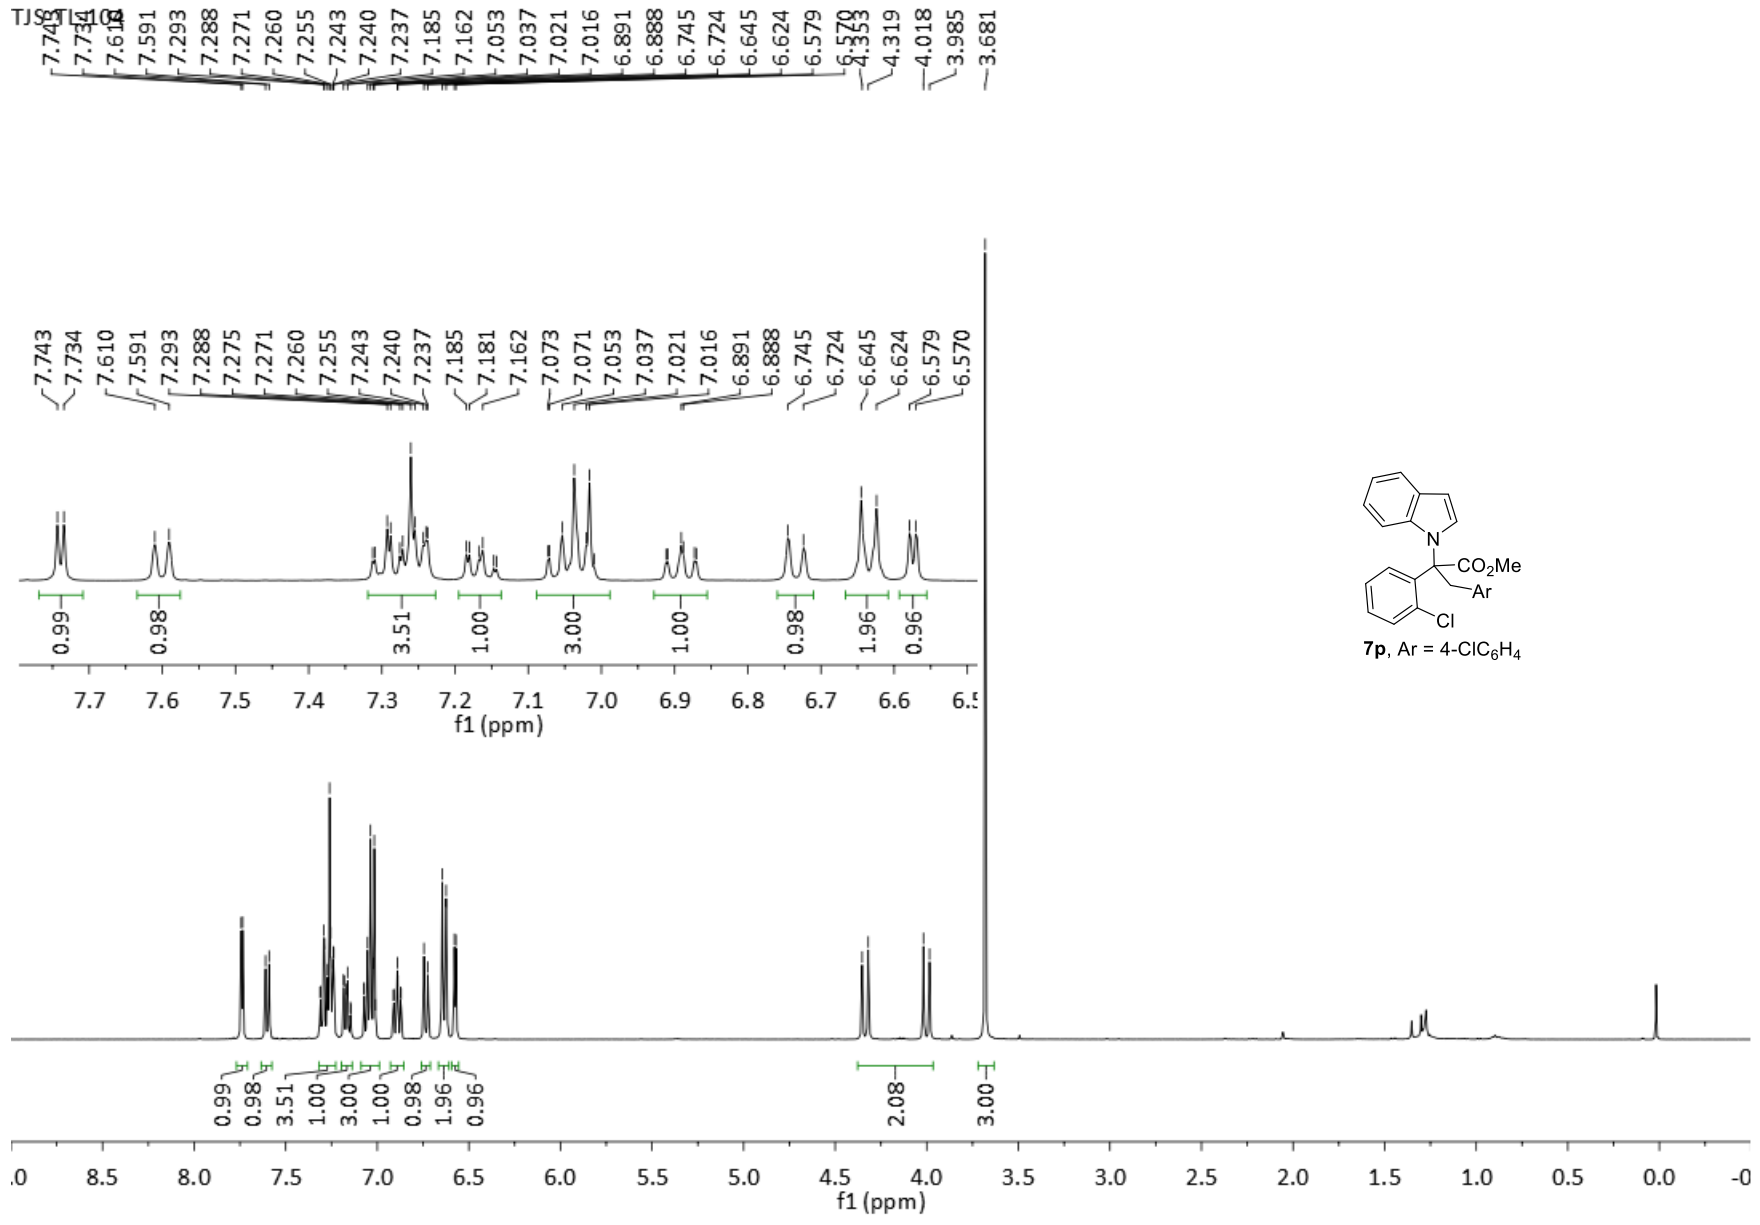

TJS-TL-104

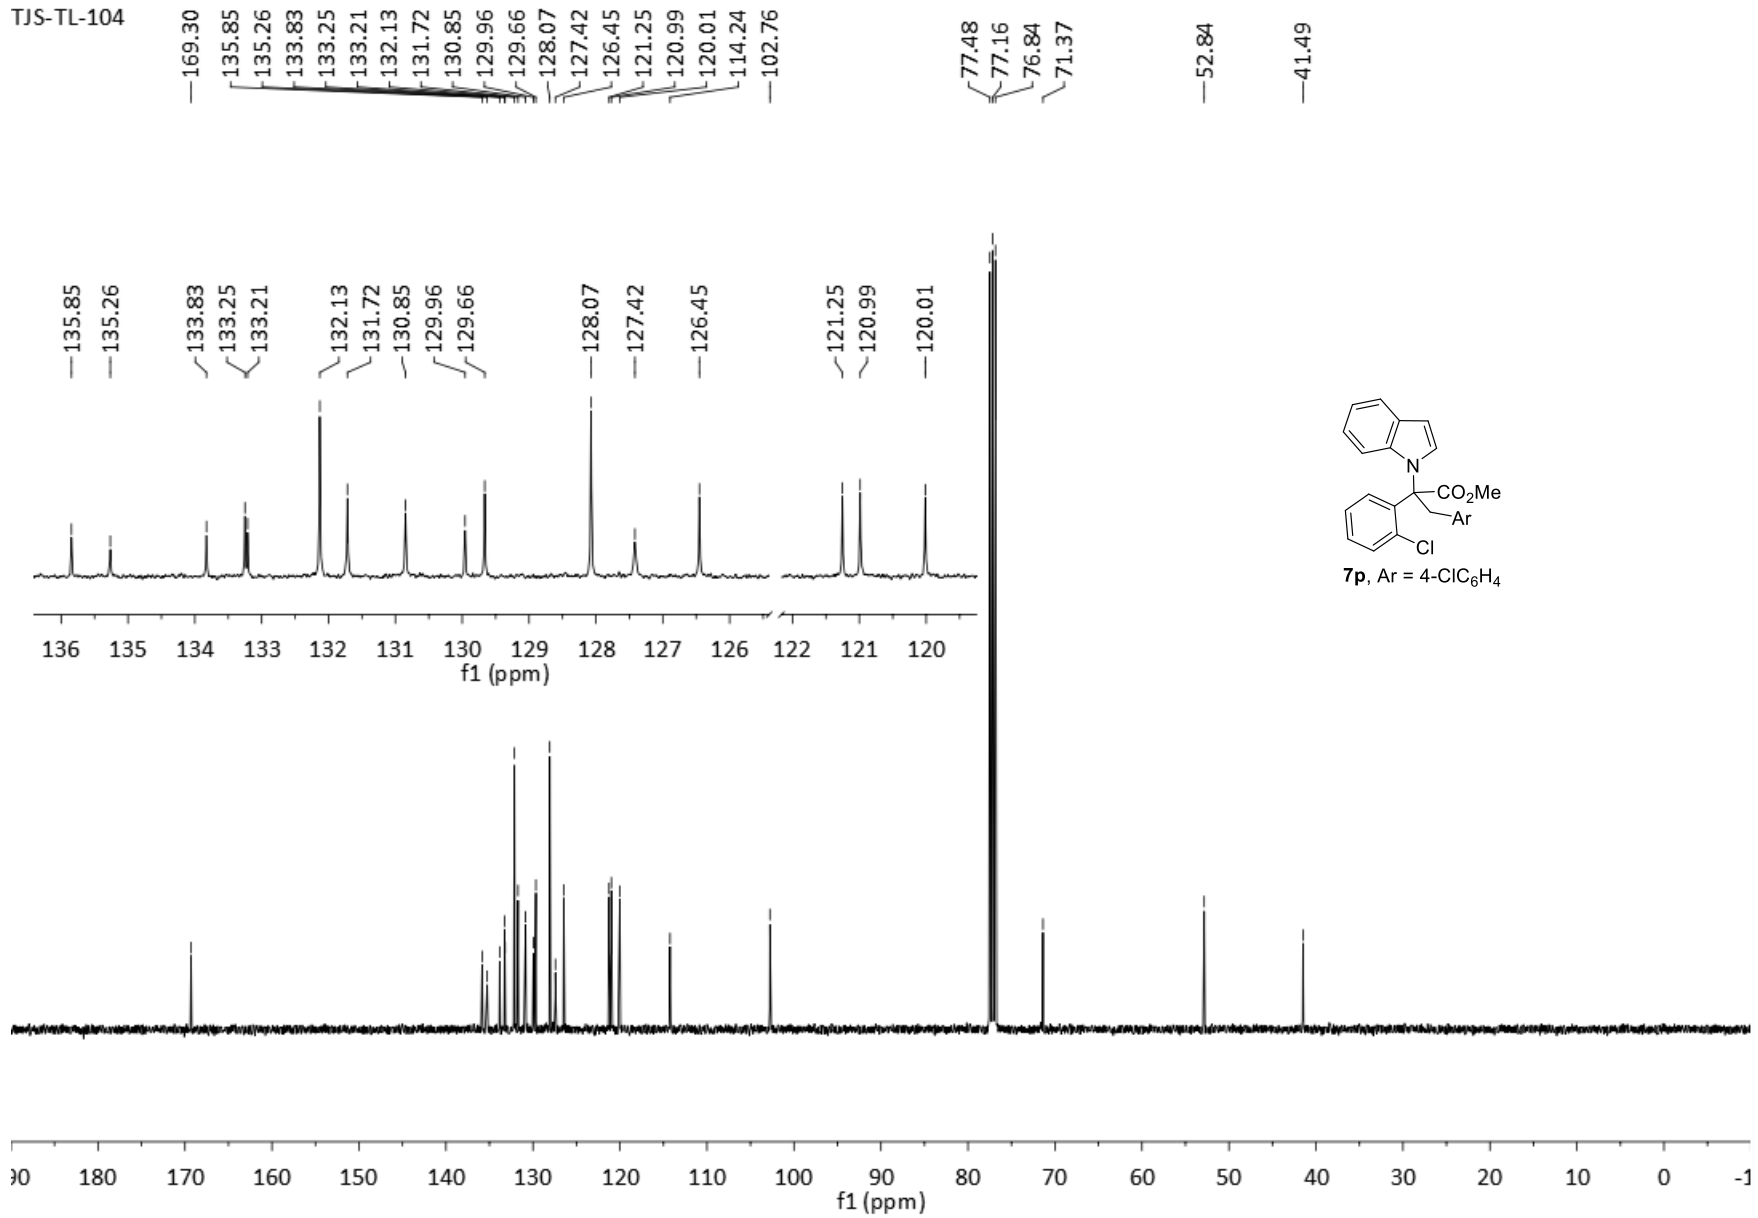



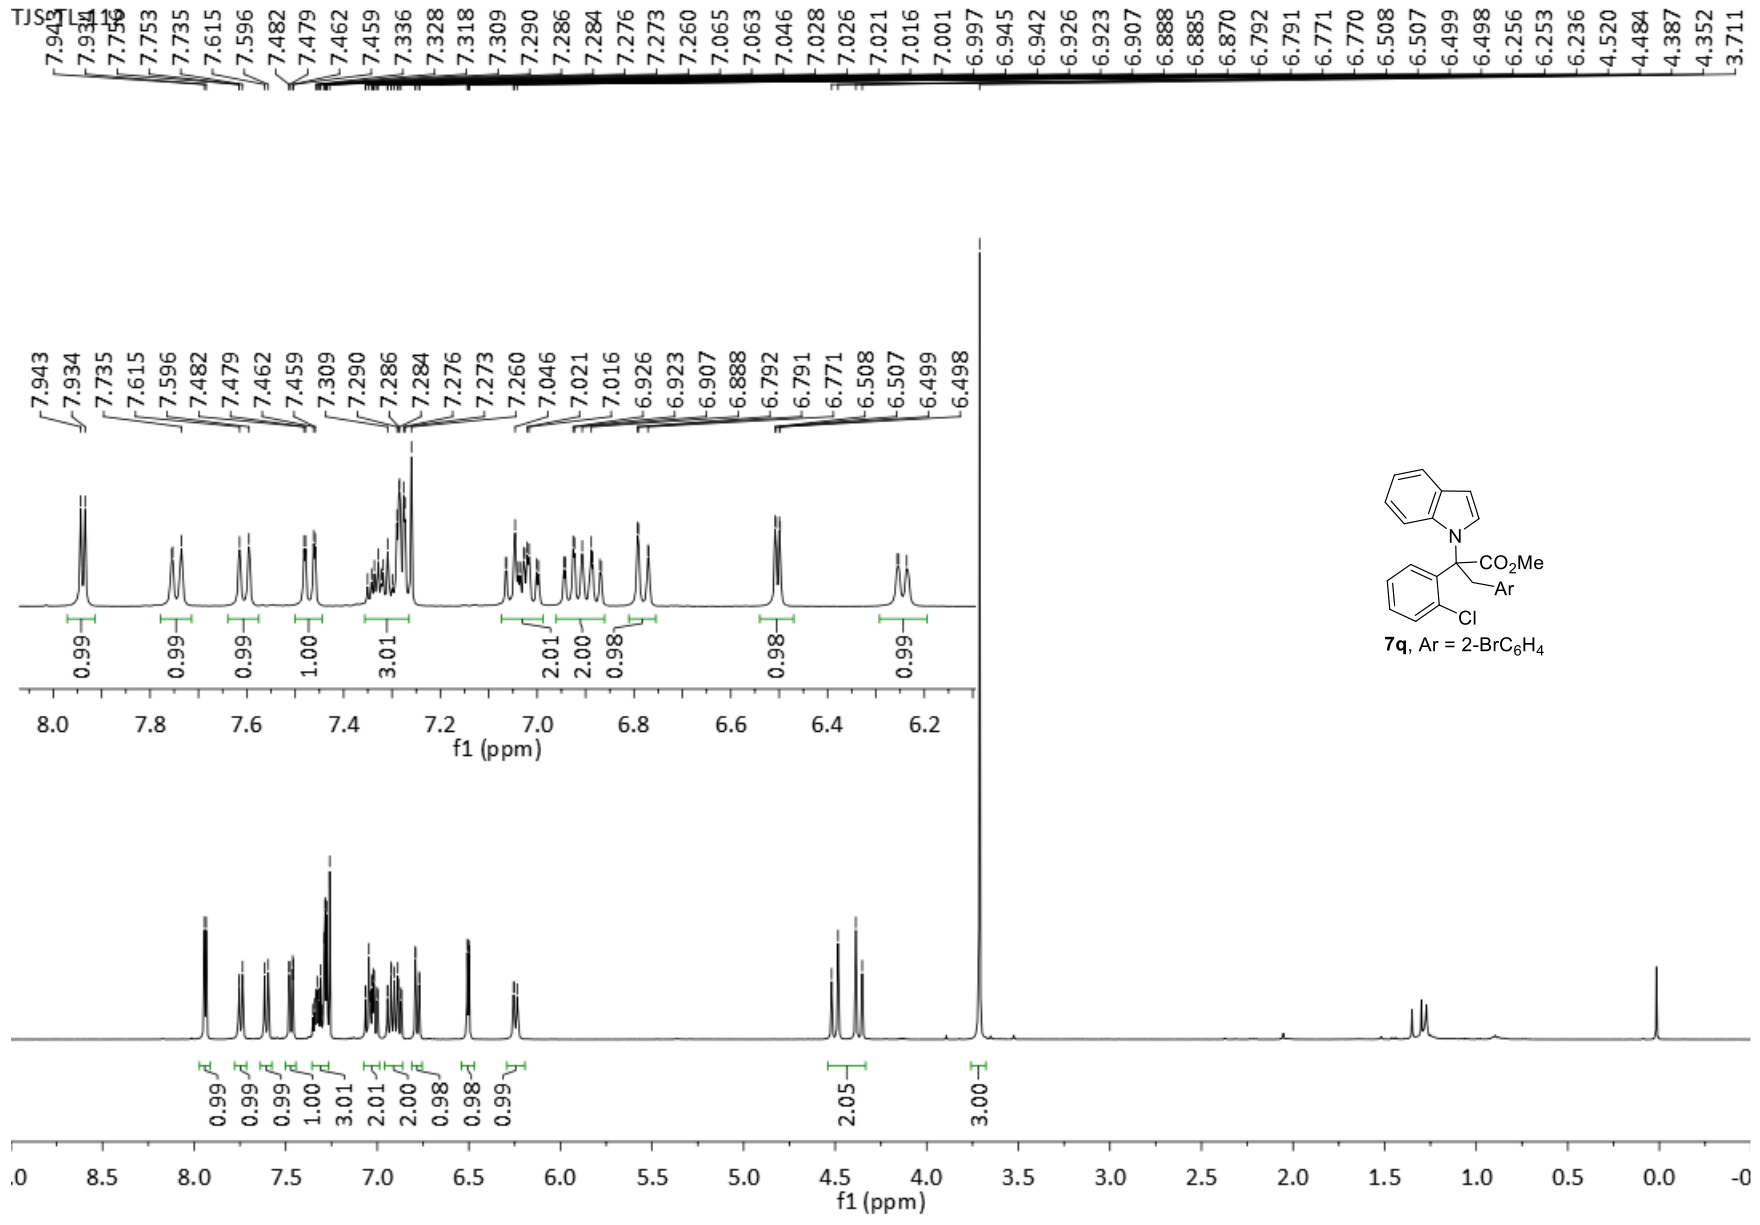

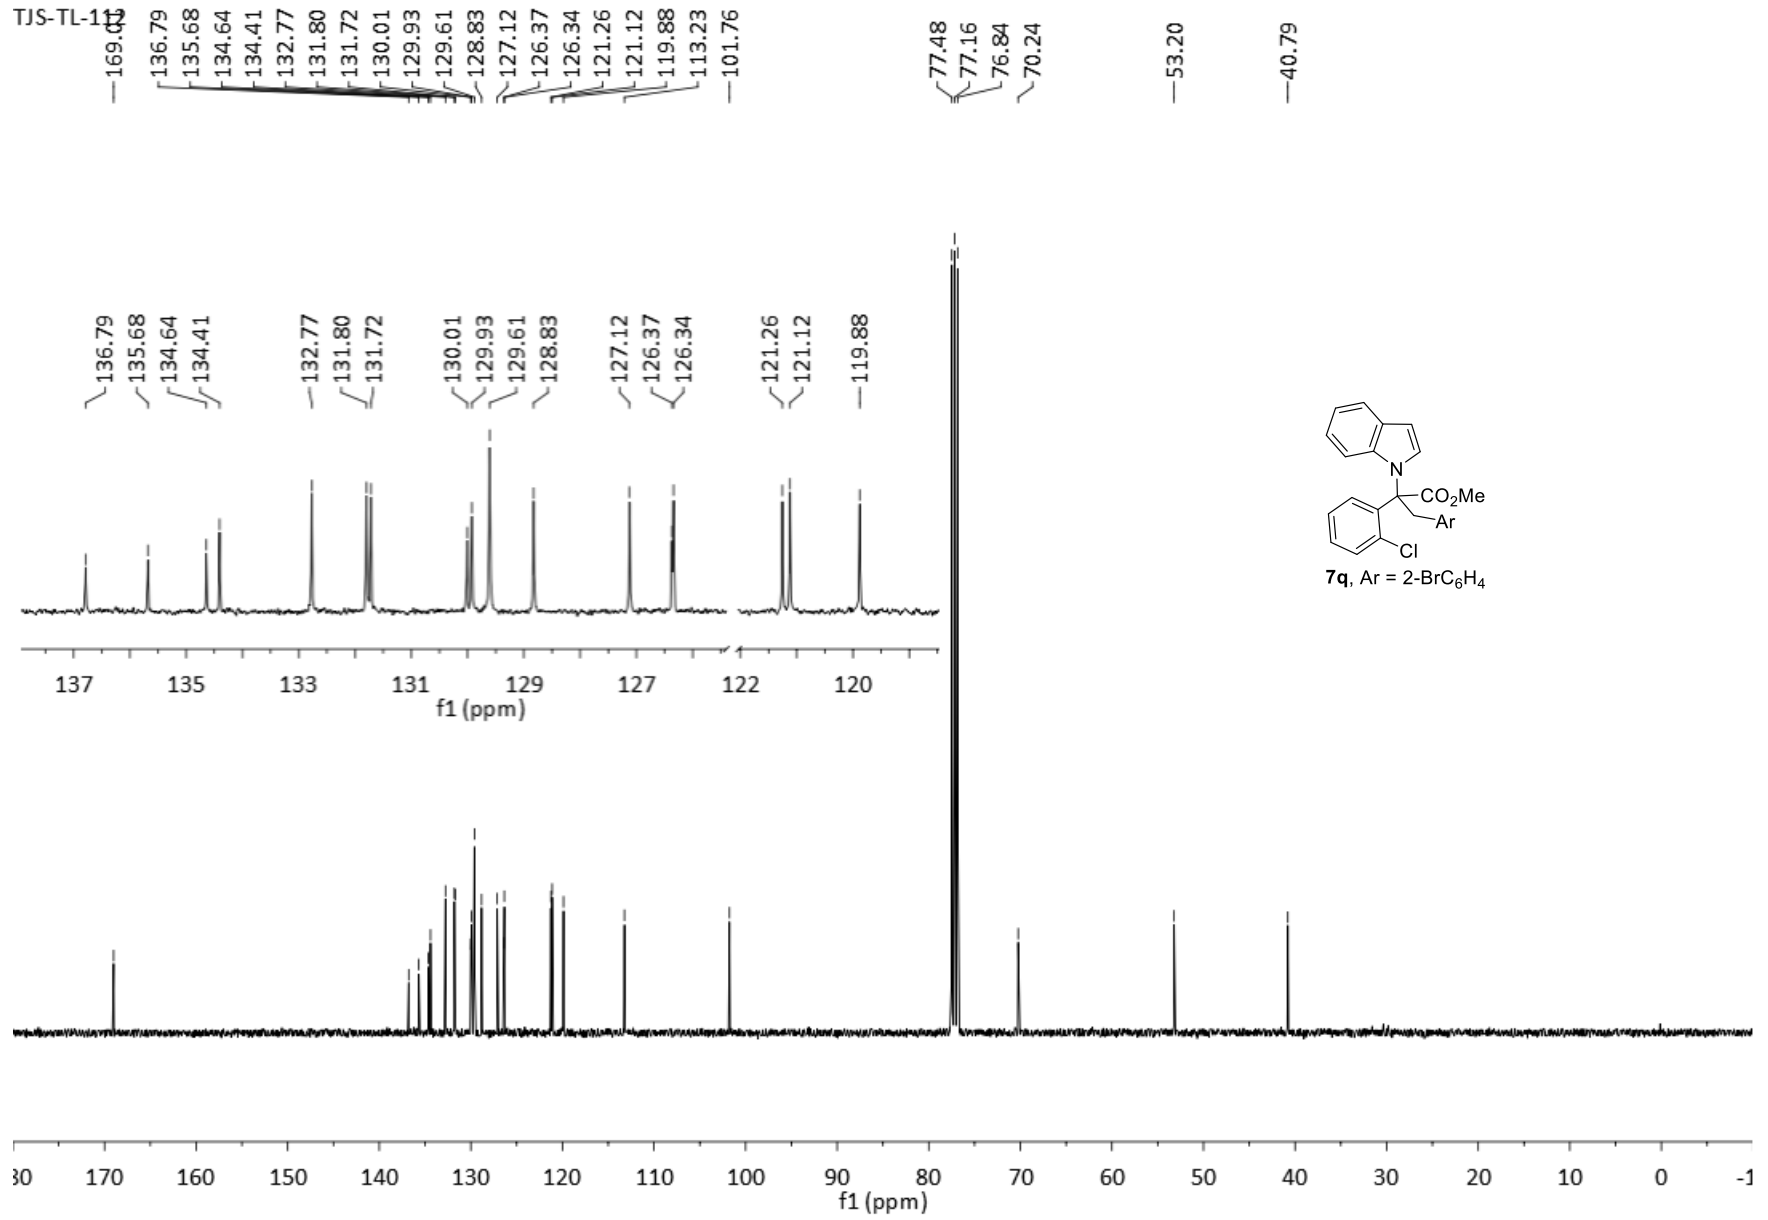

TJS-TL-98

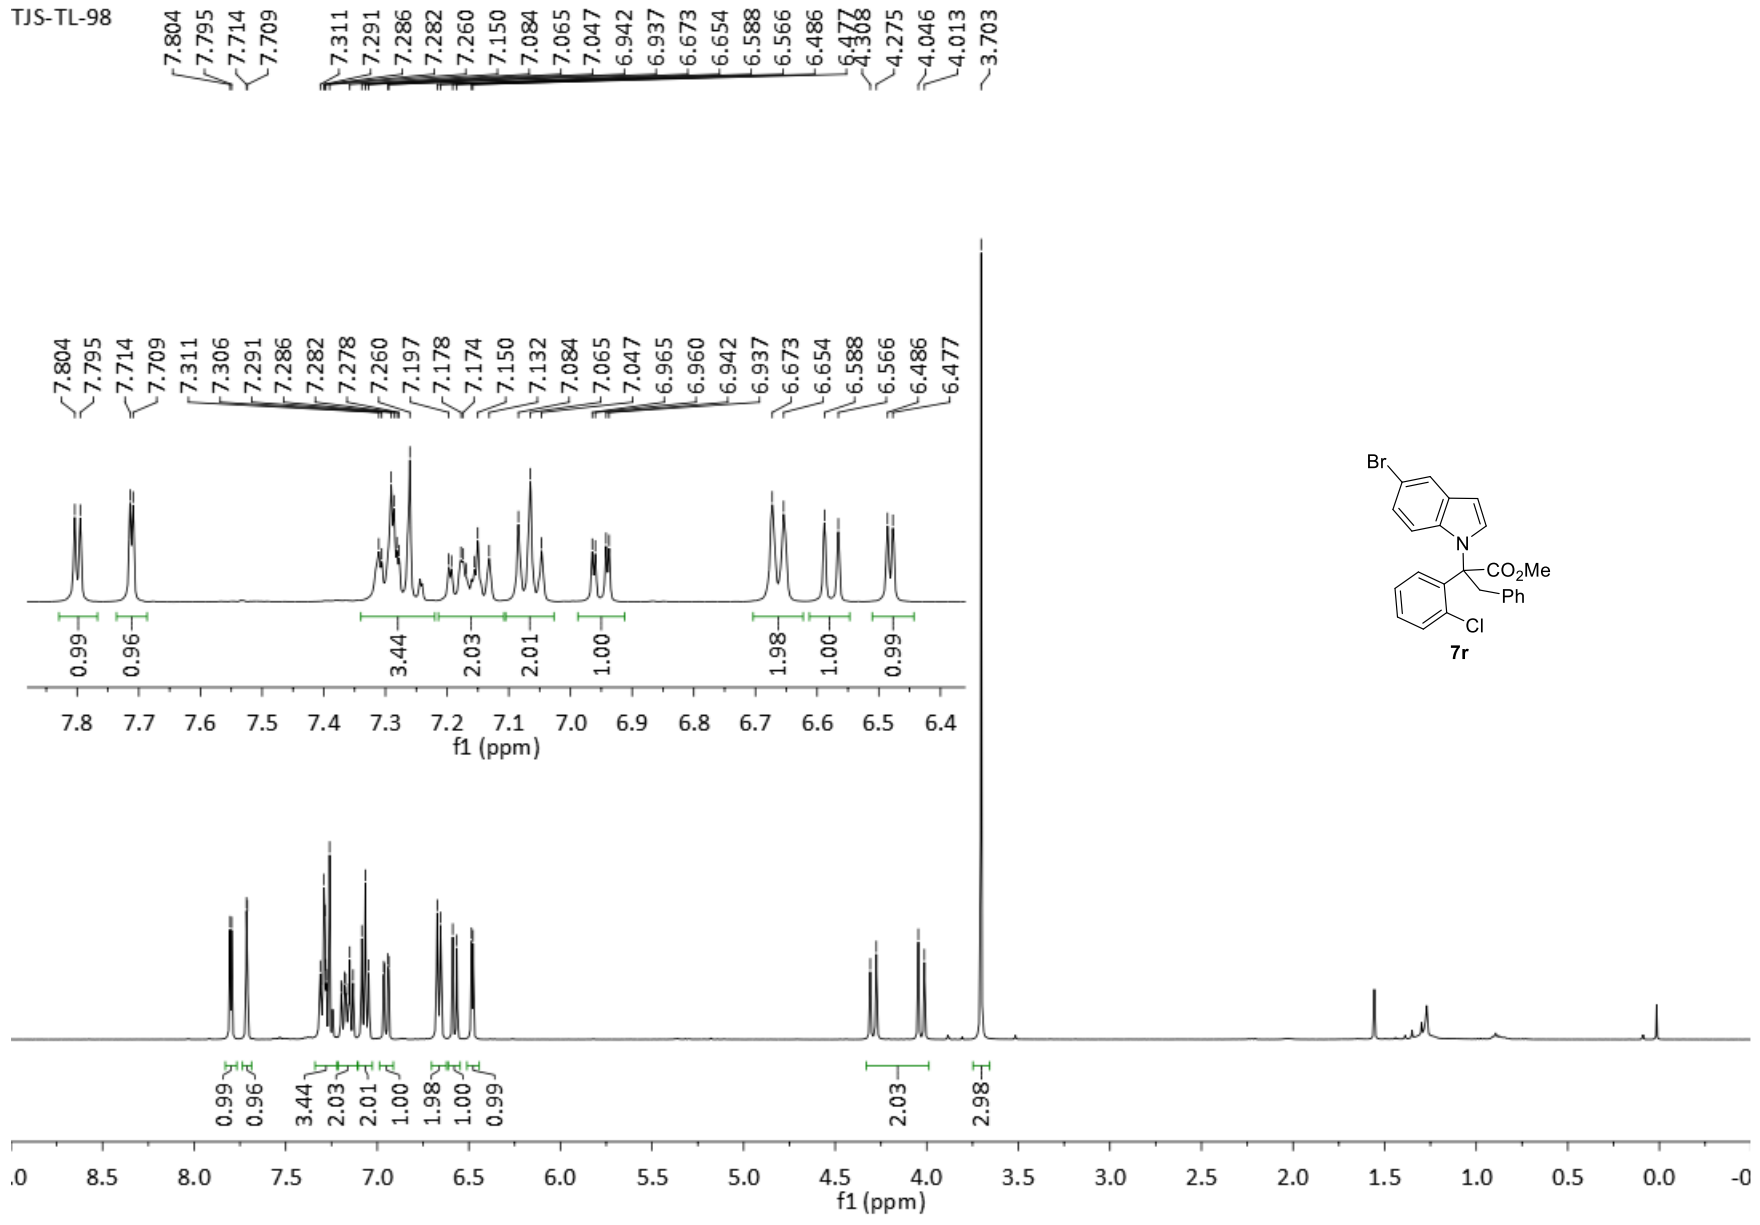

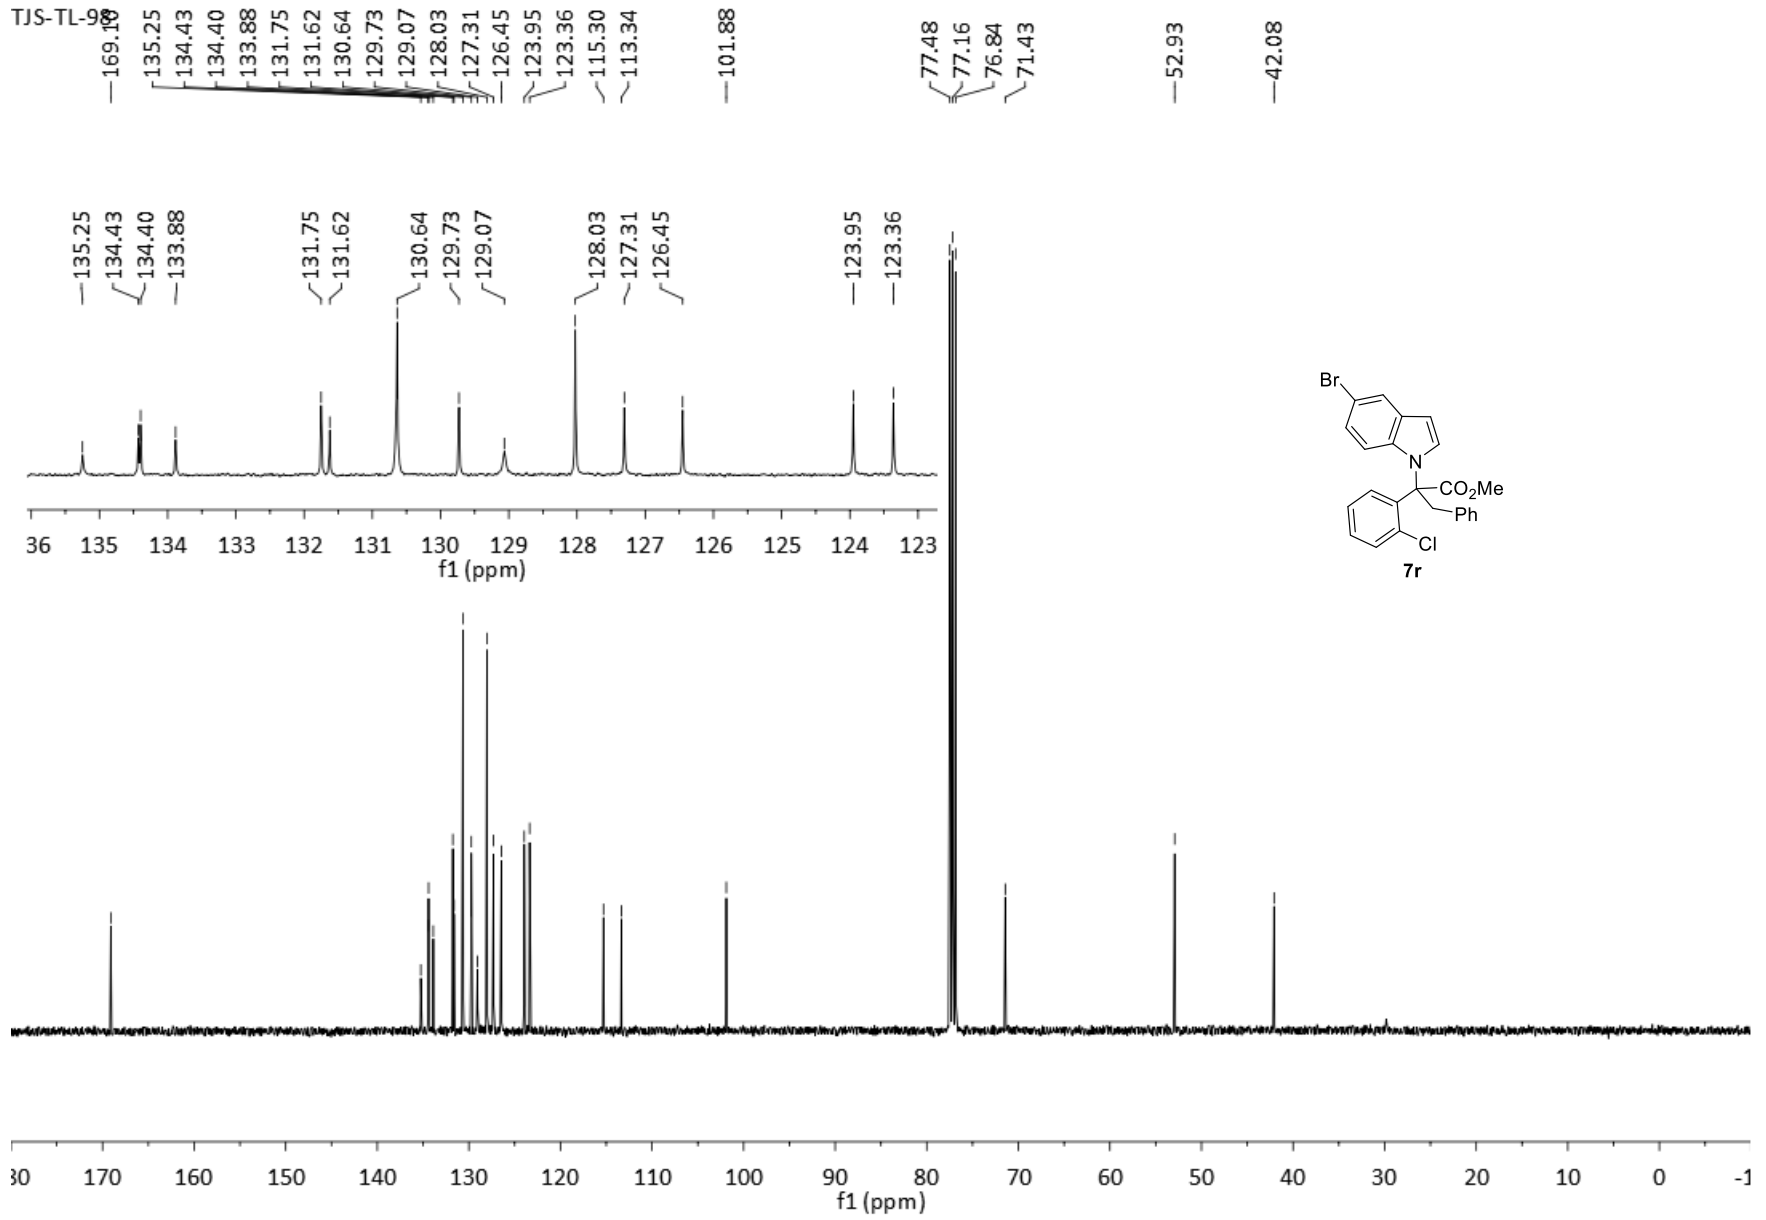

TJS-TL-100

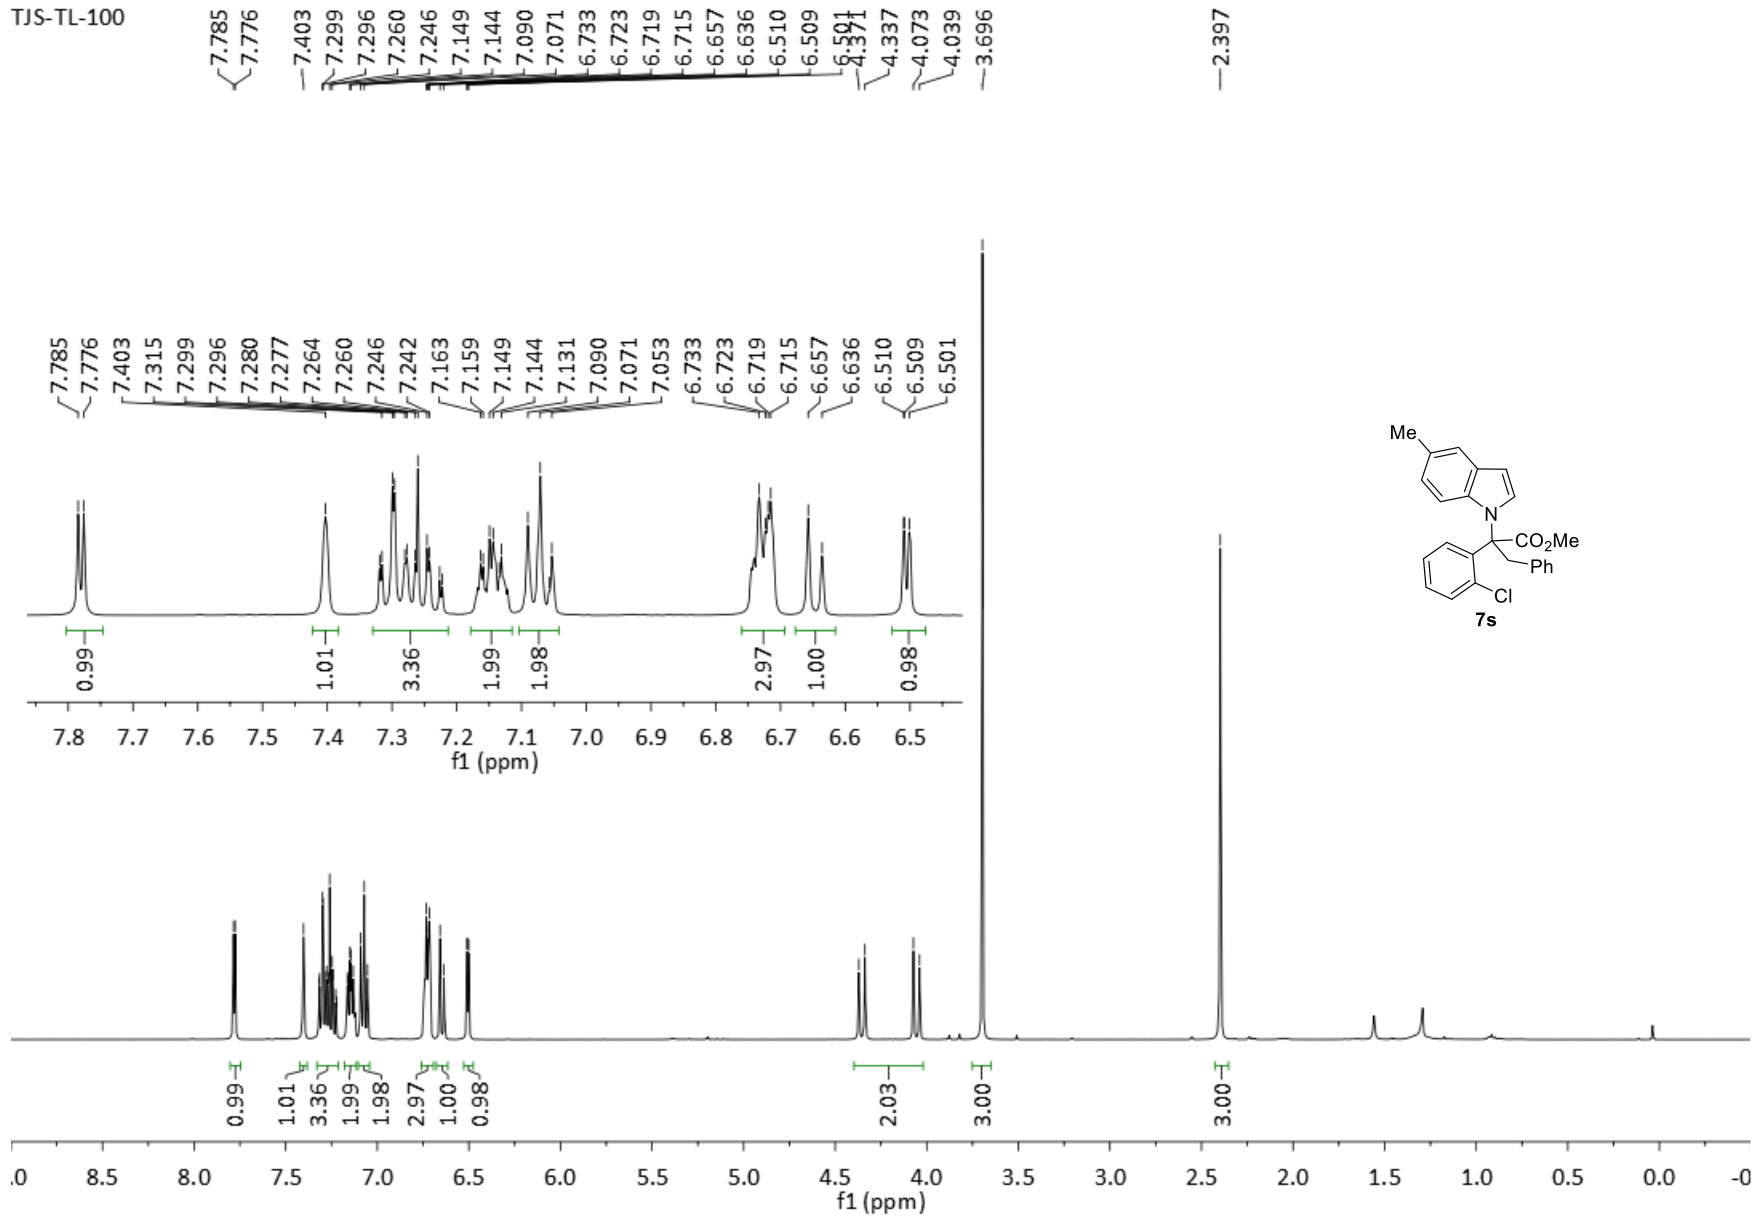

TJS-TL-10

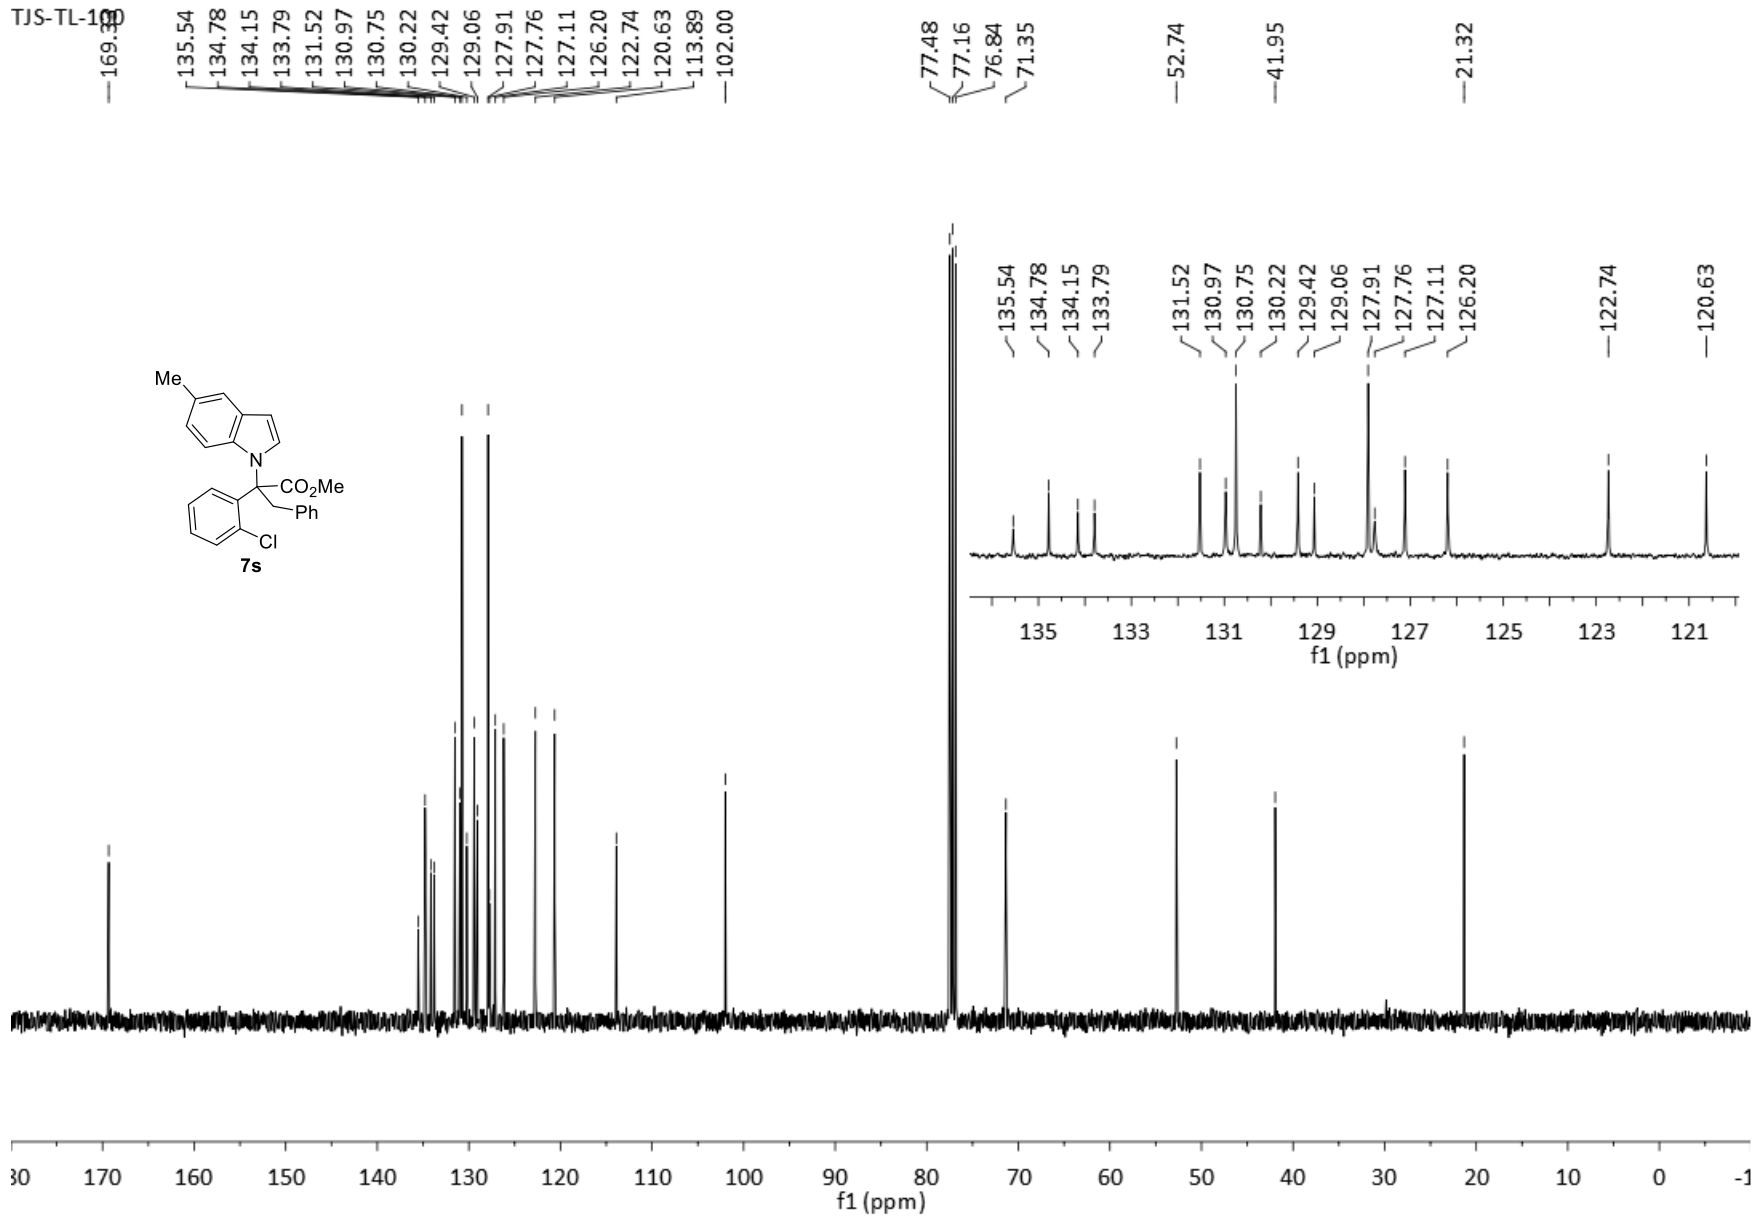

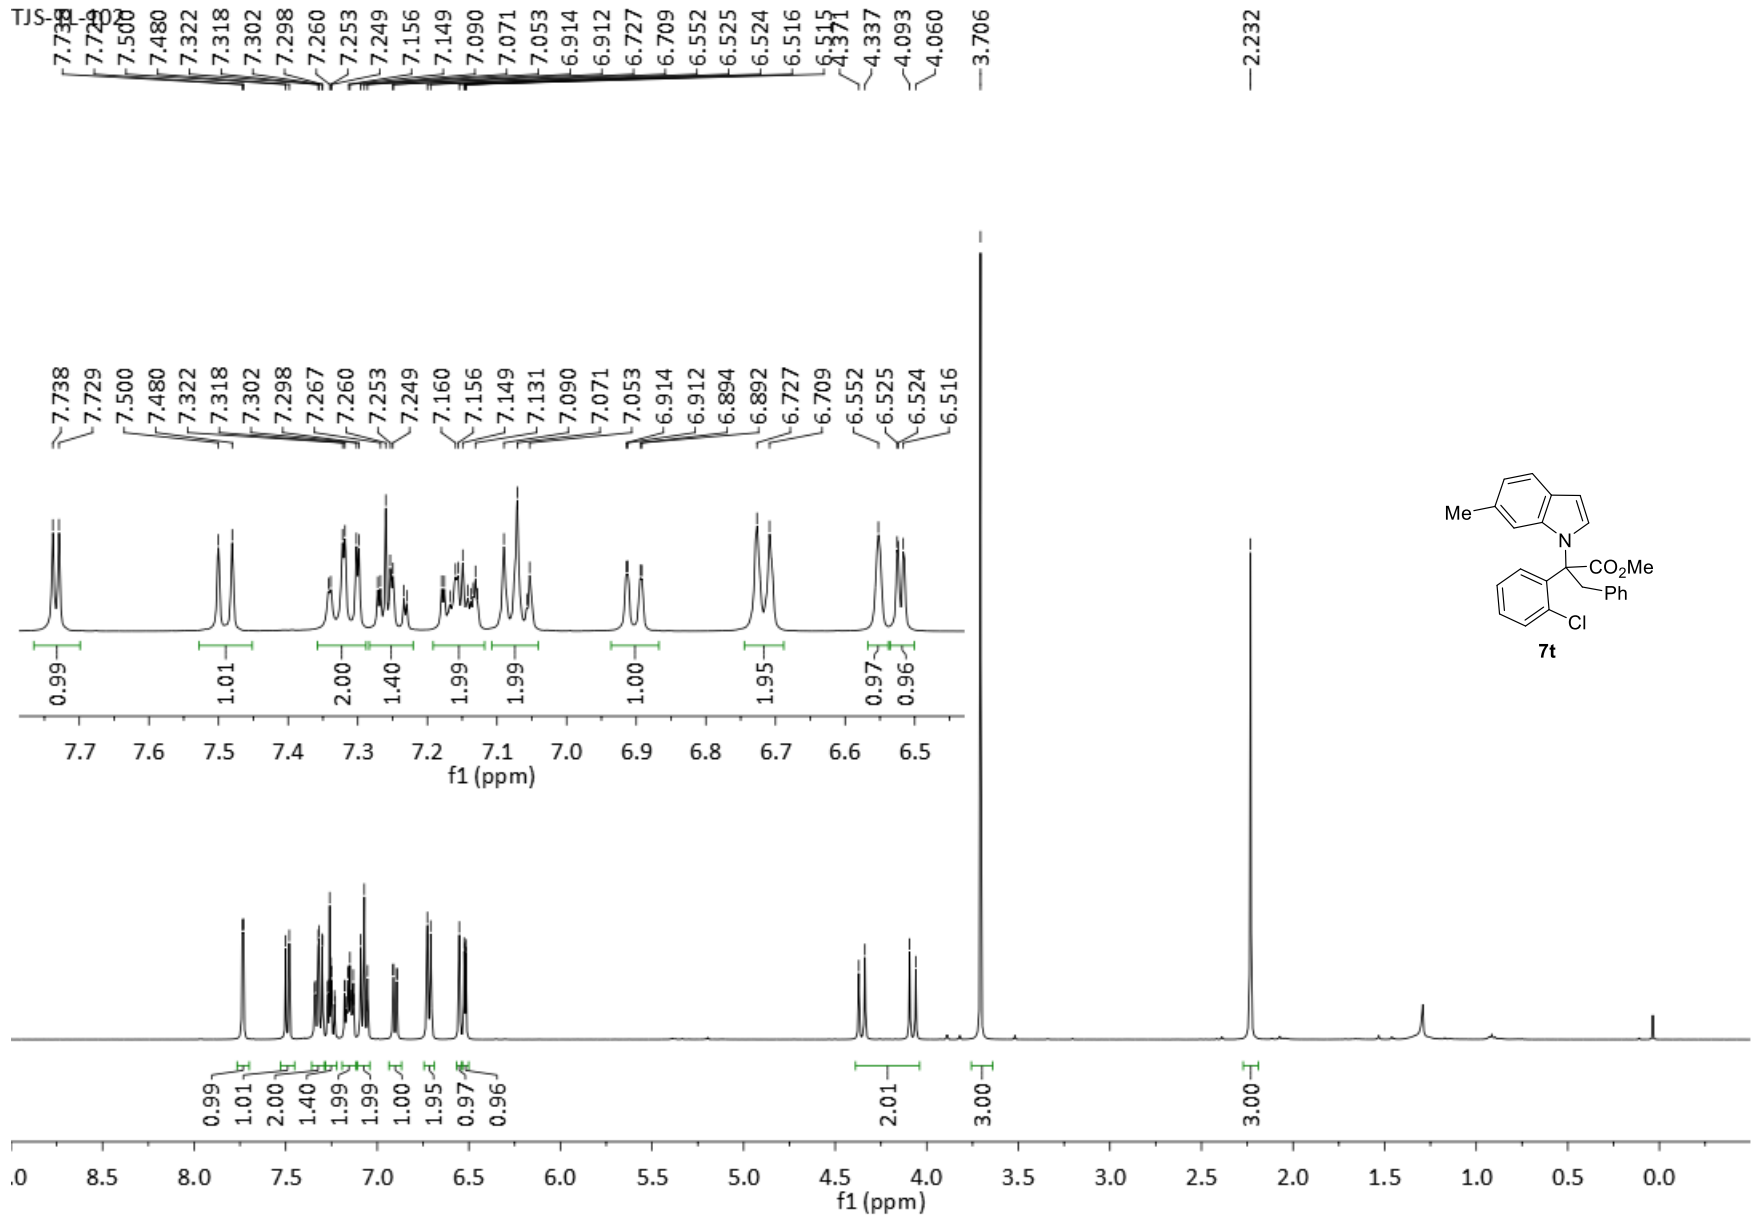

TJS-TL-102

169.31  
136.25  
135.57  
134.83  
133.81  
131.58  
130.97  
130.72  
130.60  
129.40  
127.91  
127.75  
127.25  
127.11  
126.15  
121.64  
120.40  
114.23  
102.20

77.48  
77.16  
76.84  
71.37  
52.77  
41.97  
22.13

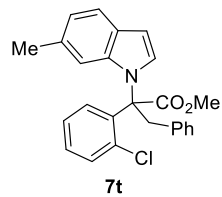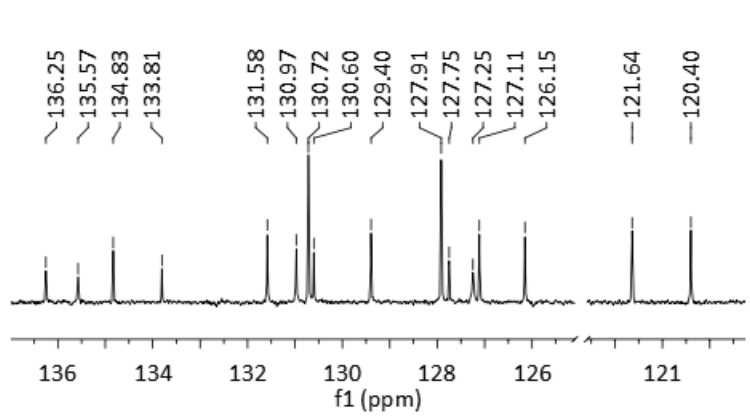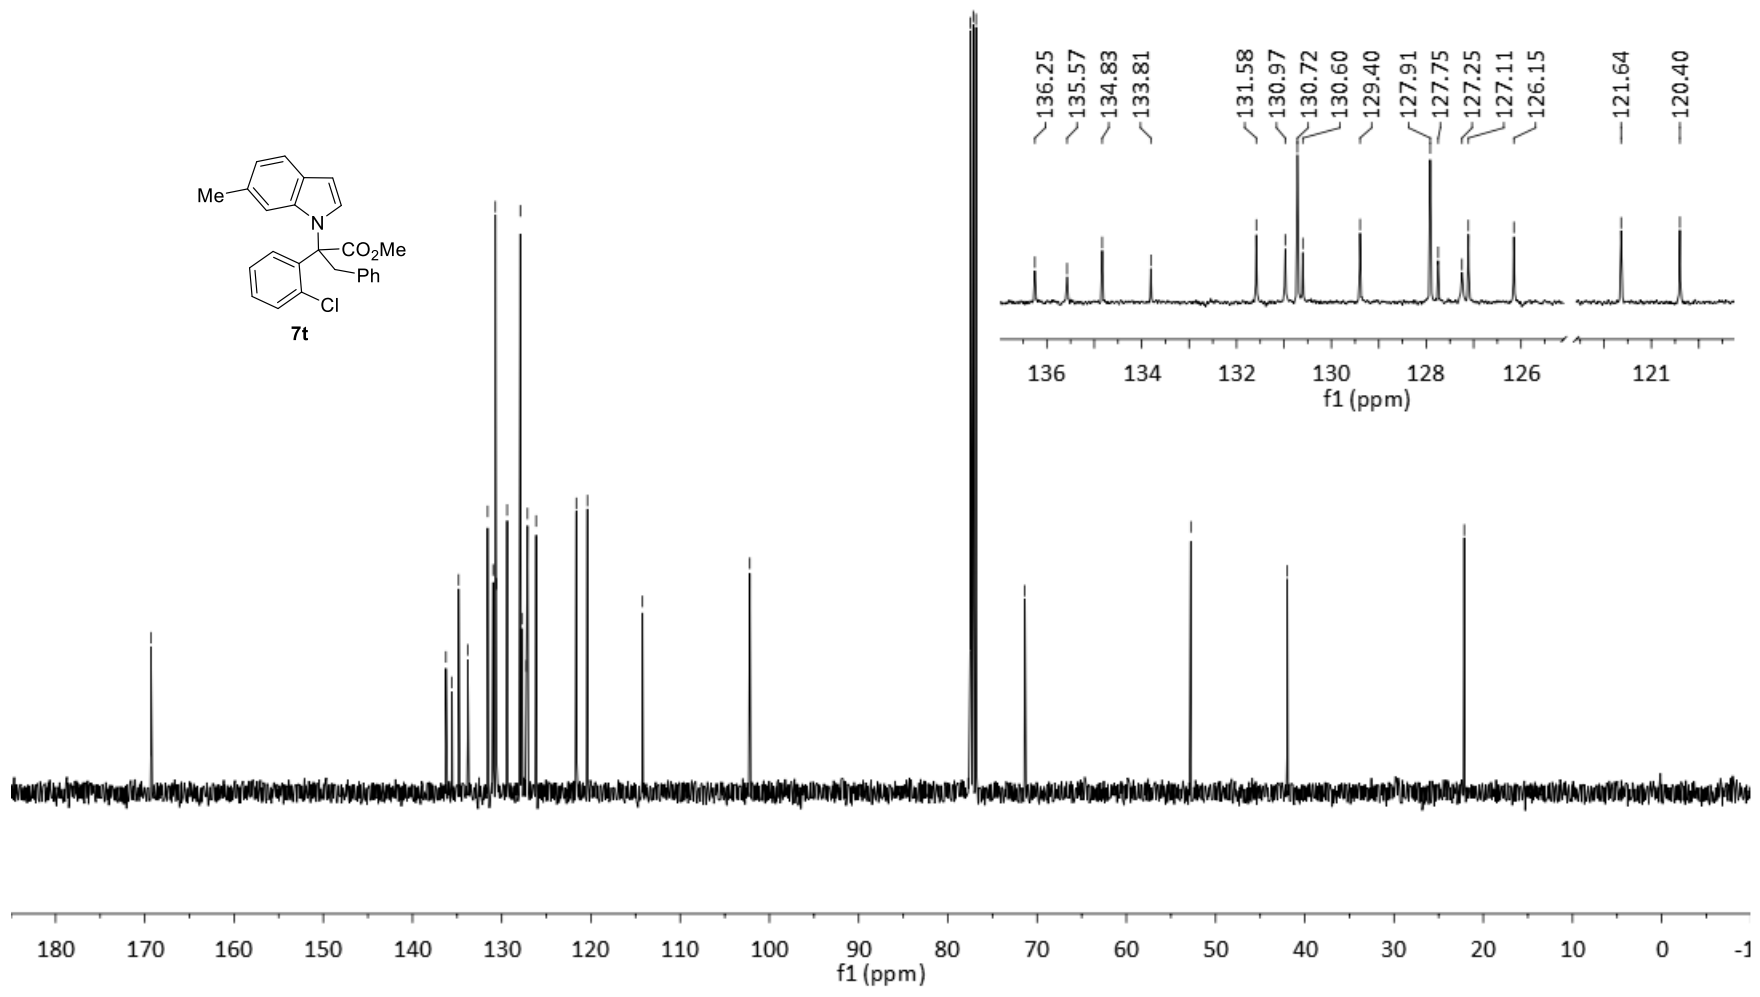



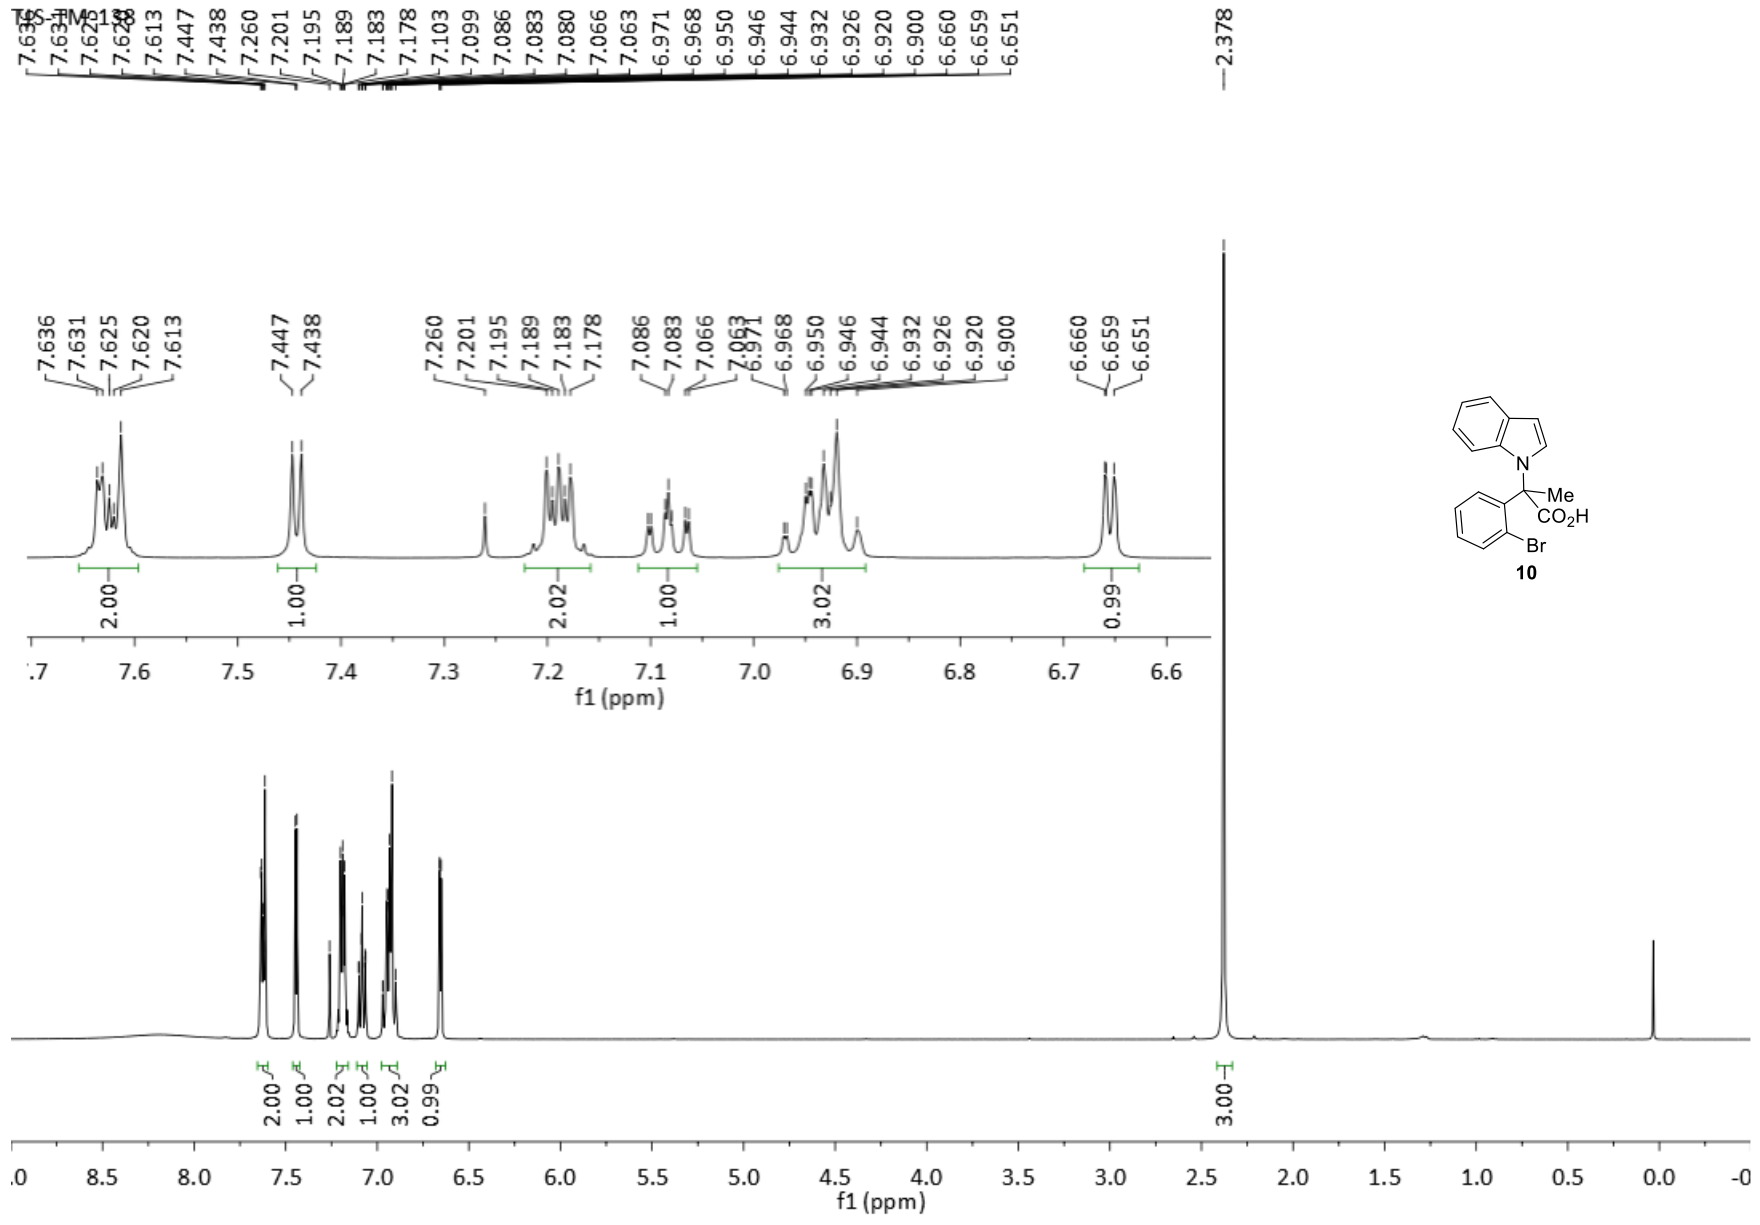

TJS-TM-138

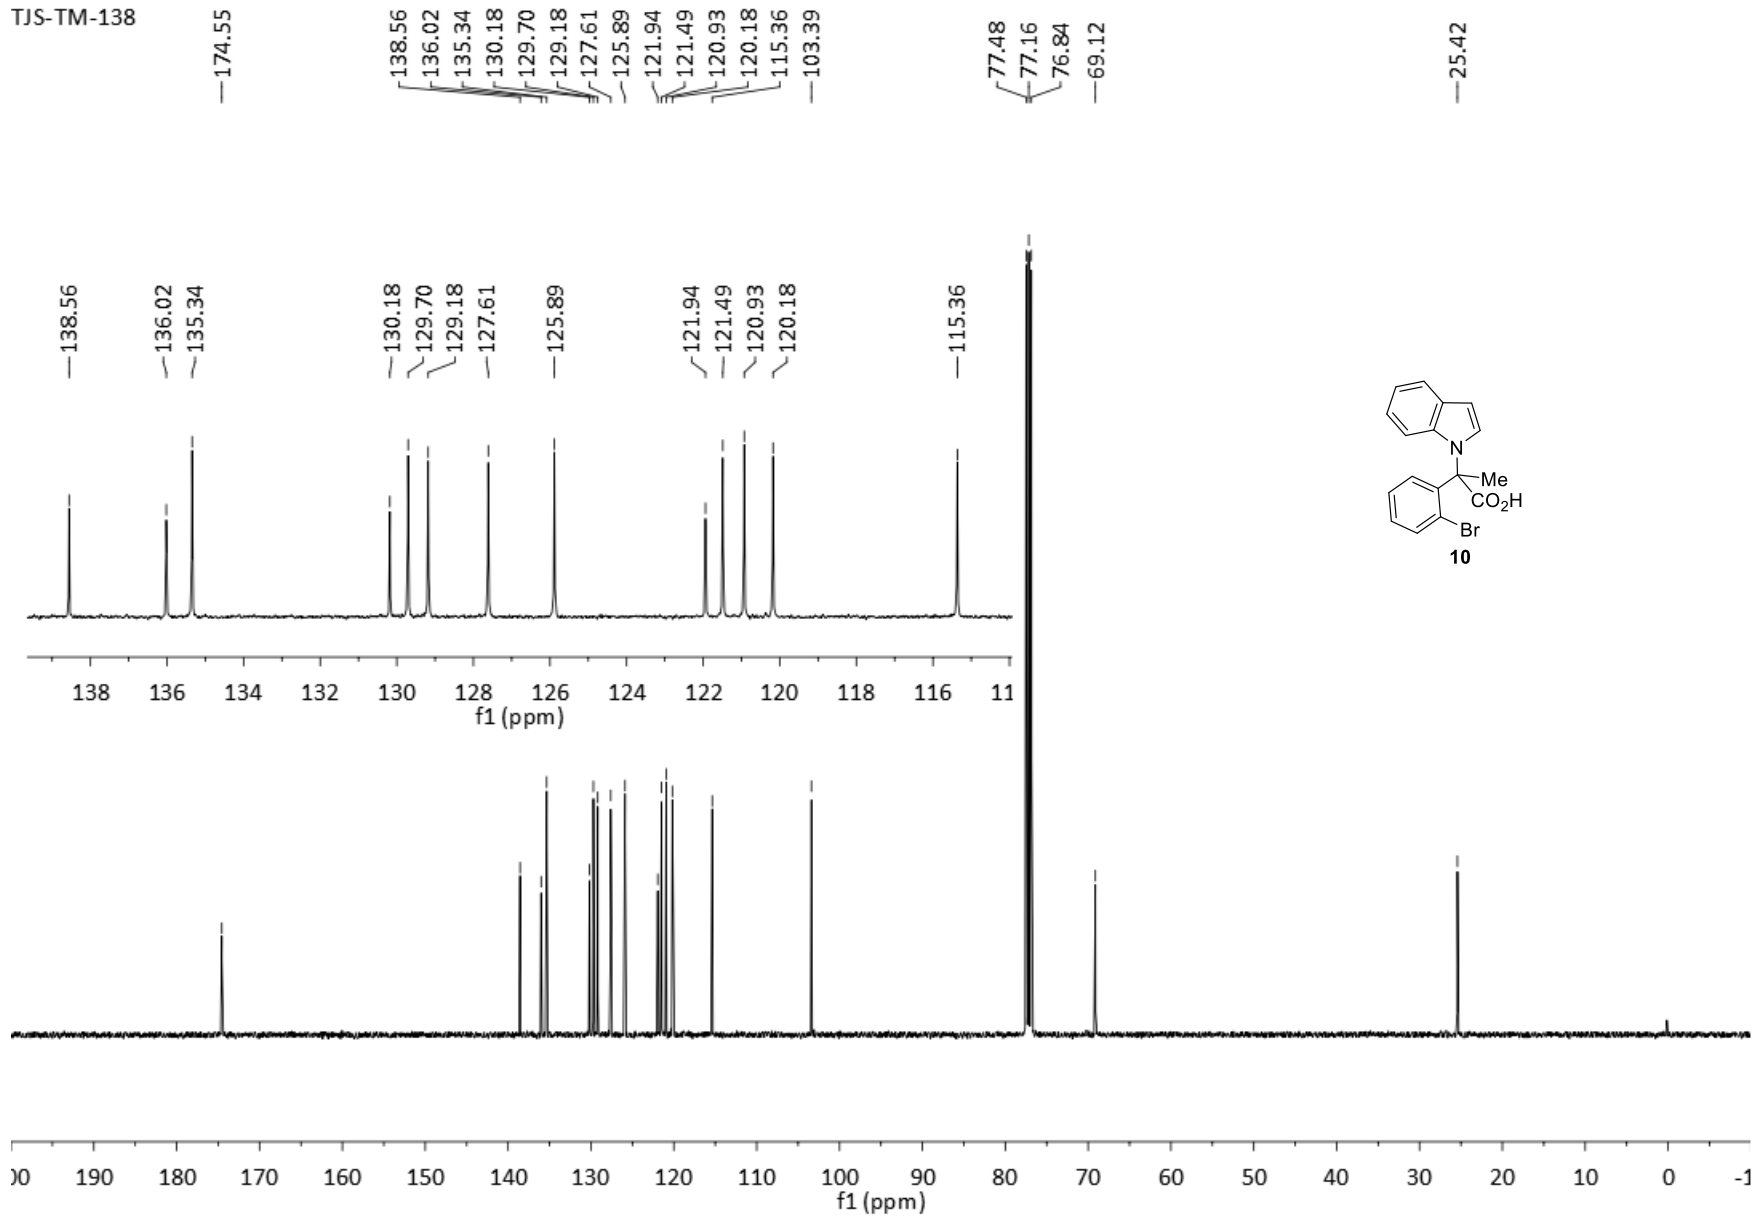

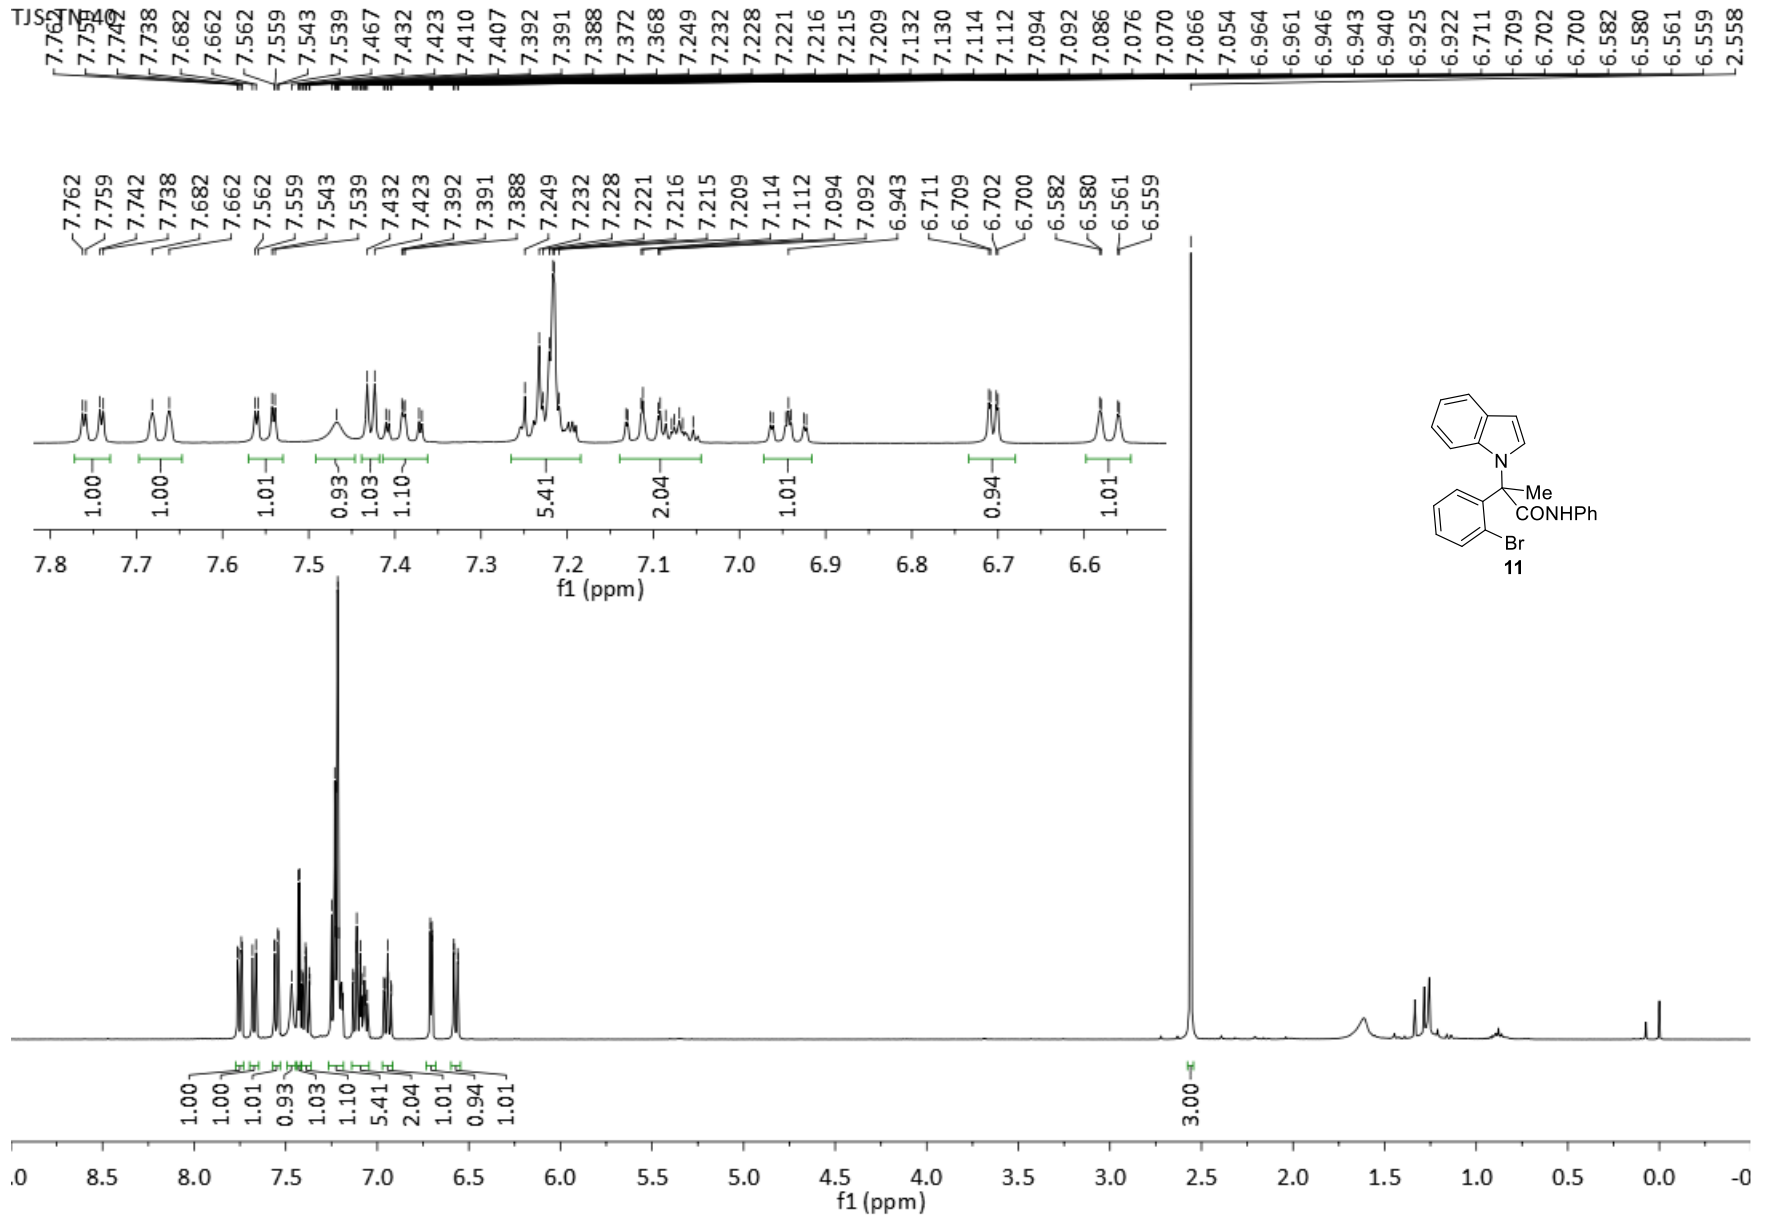

TJS-TN-40

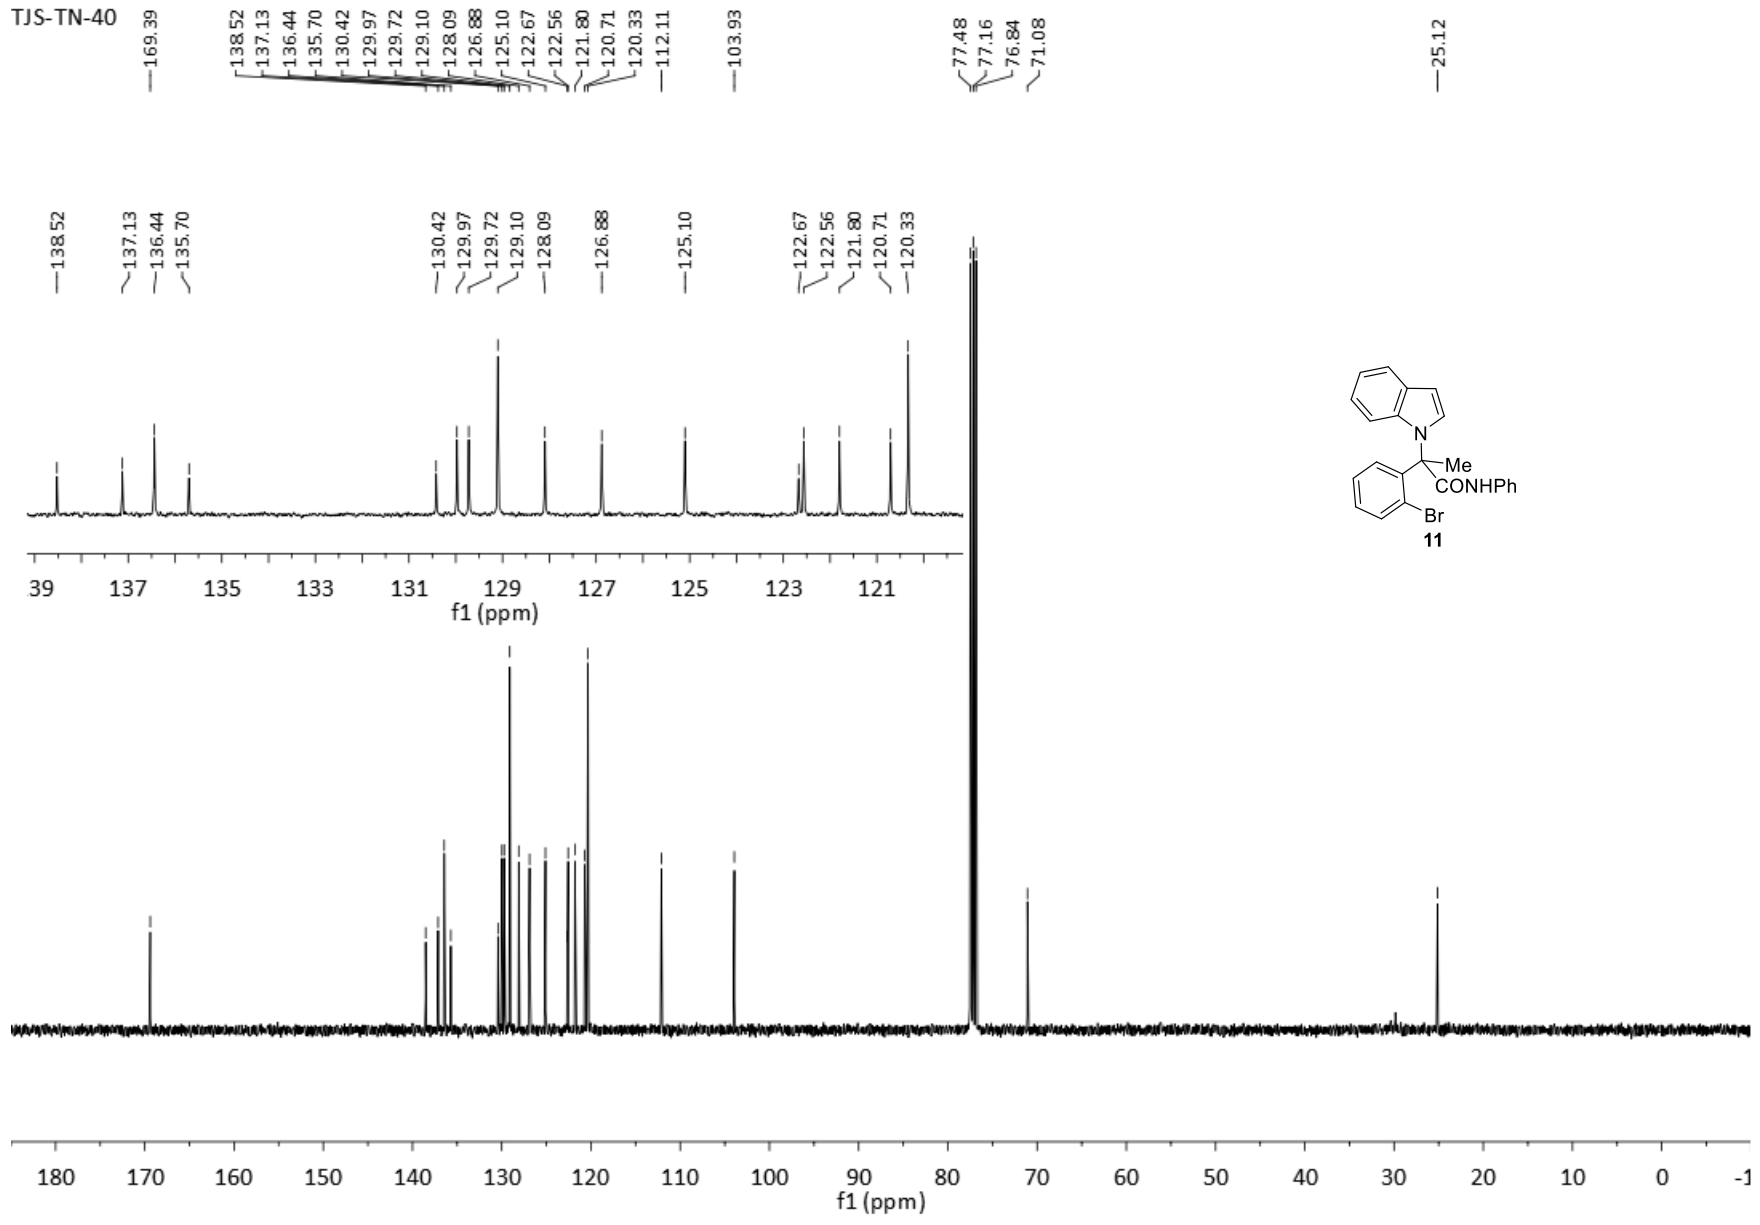

TJS-TM-286

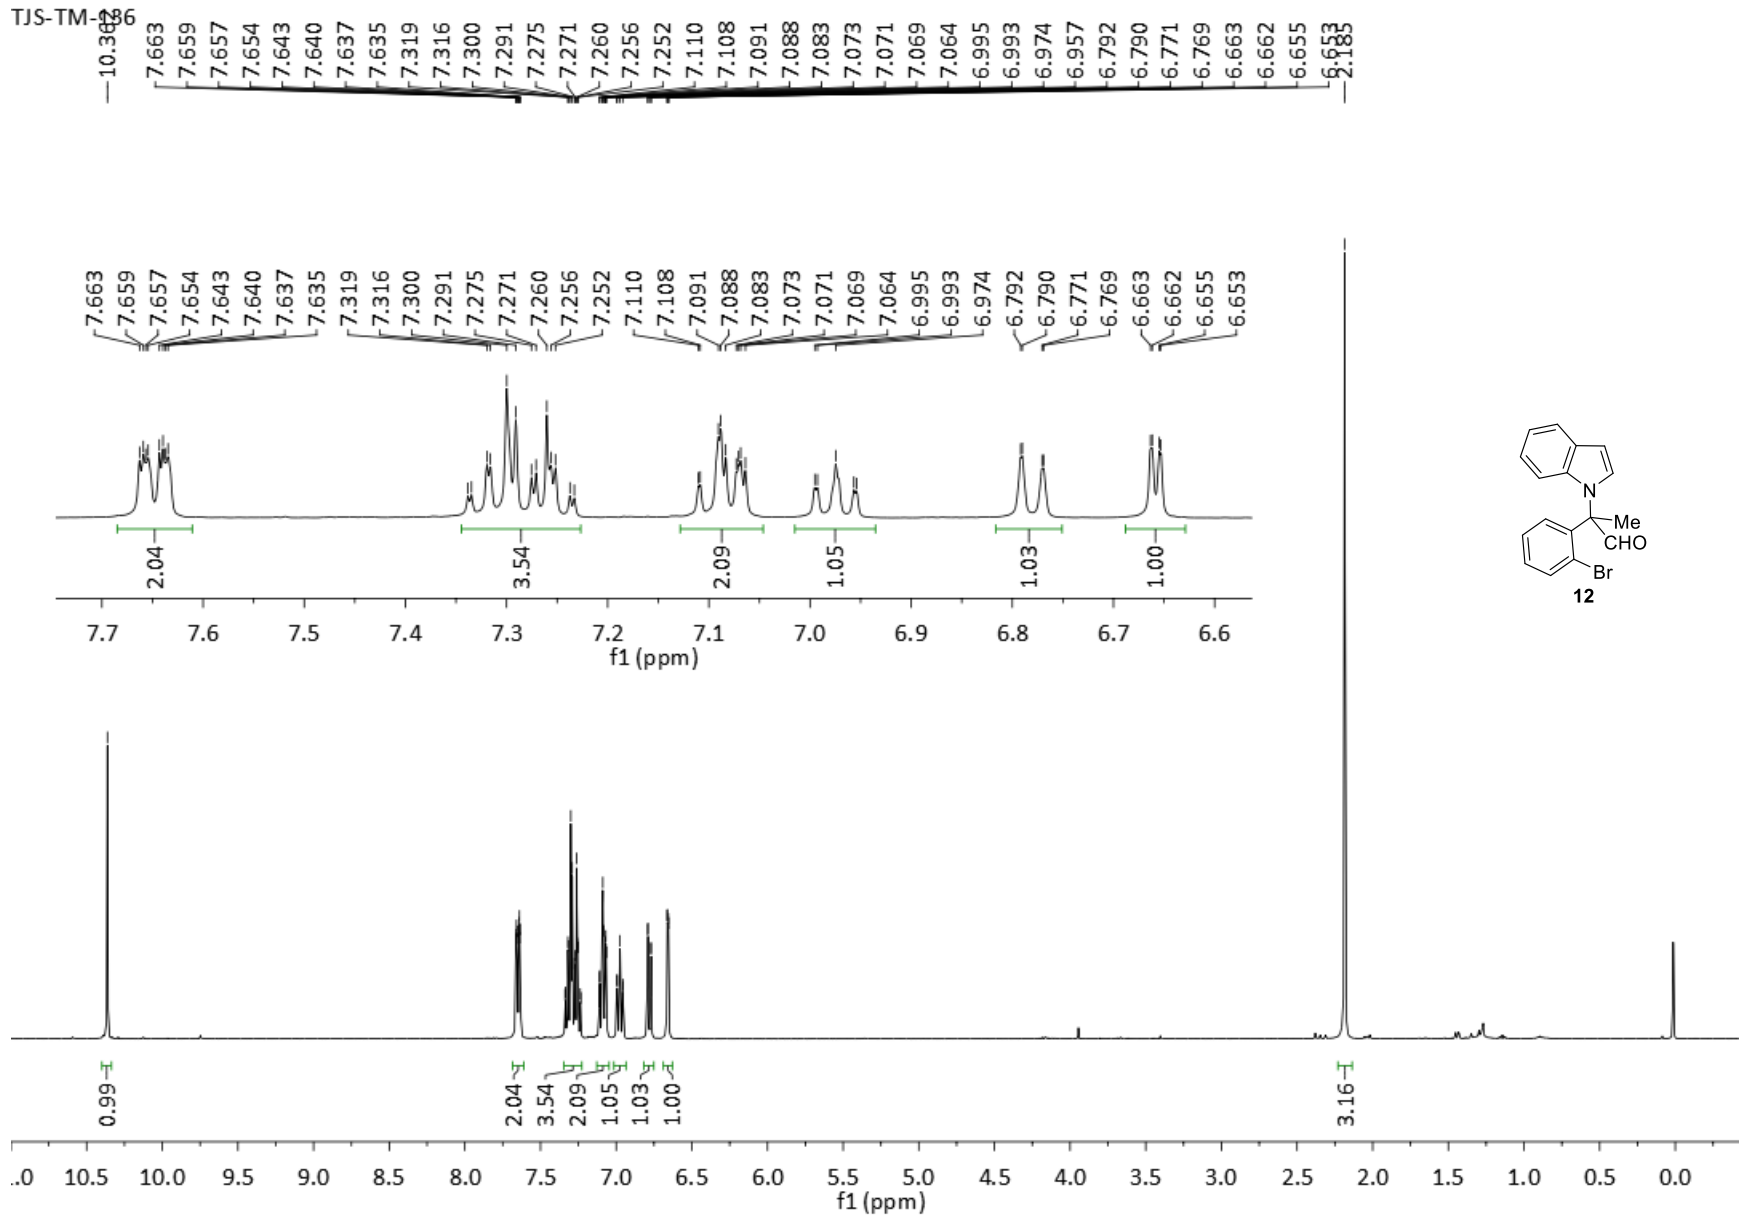

TJS-TM-136

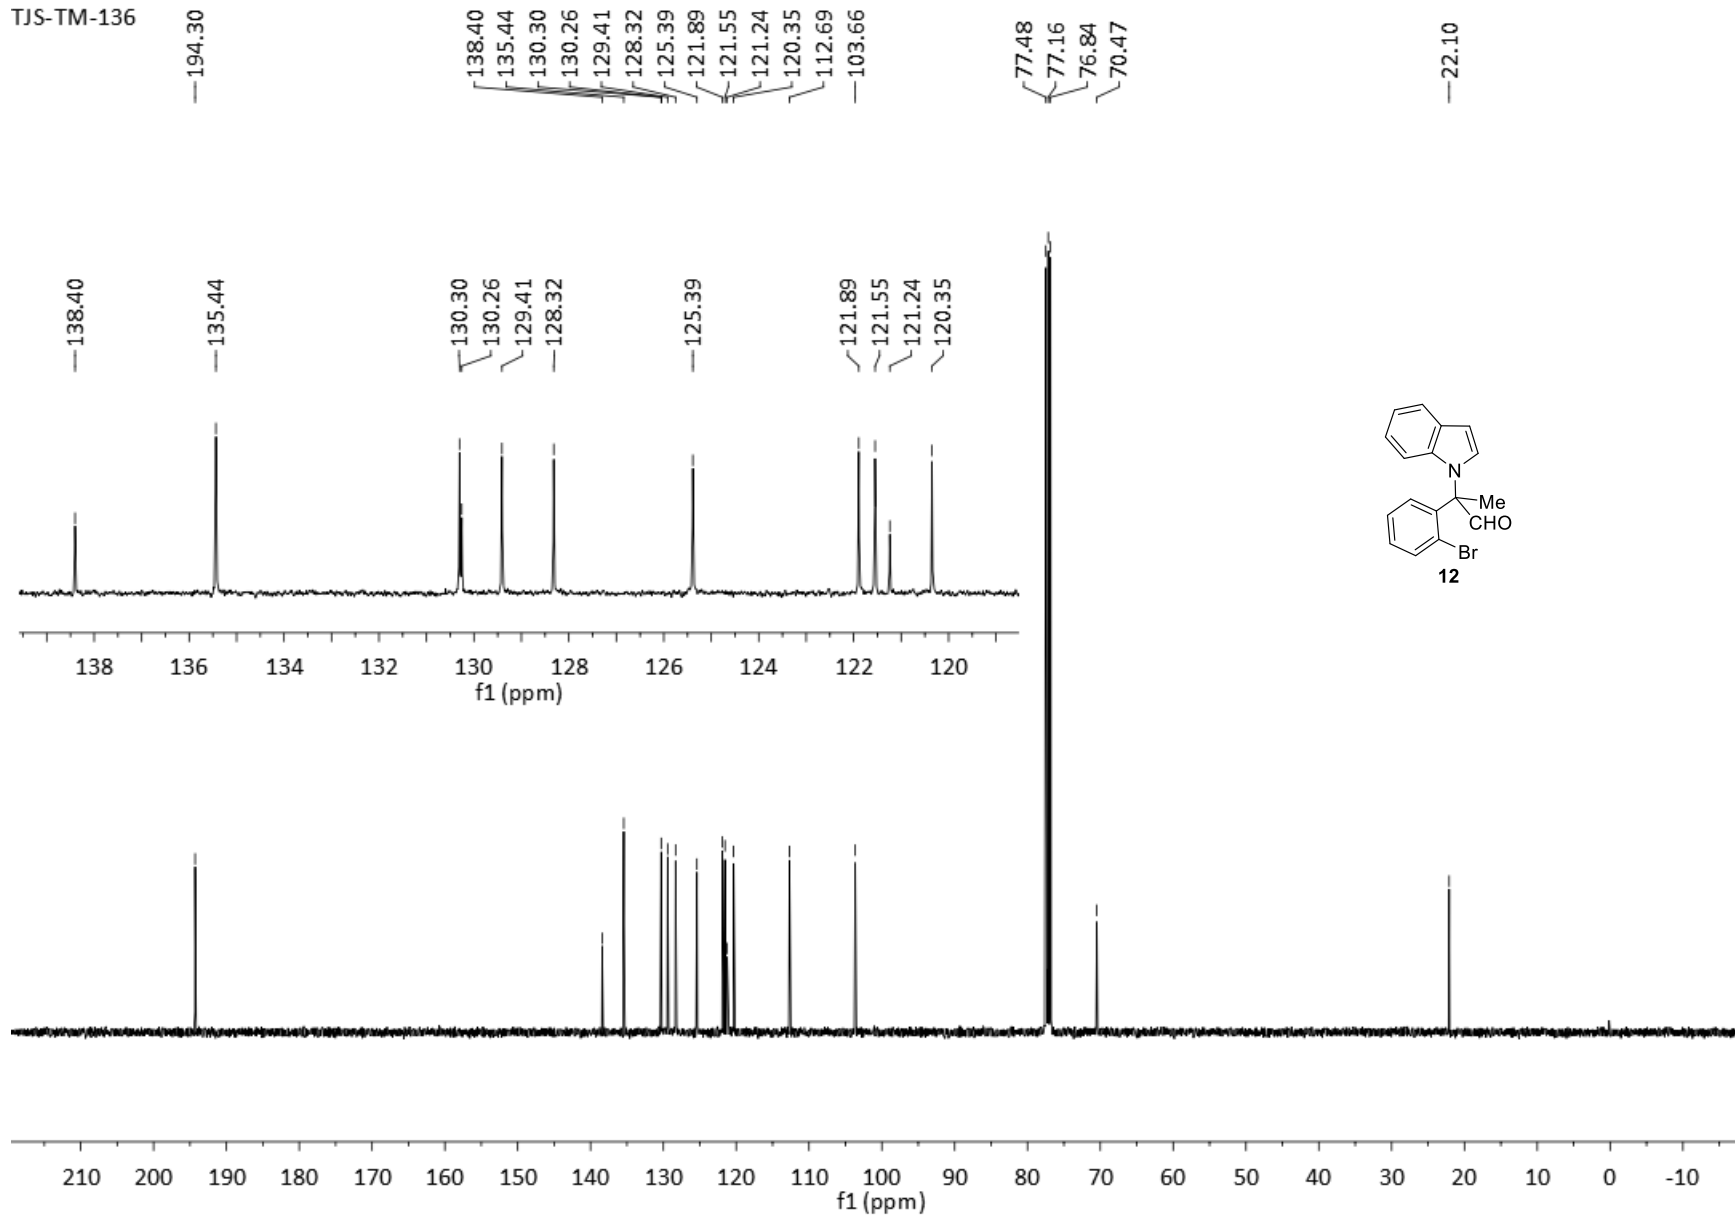

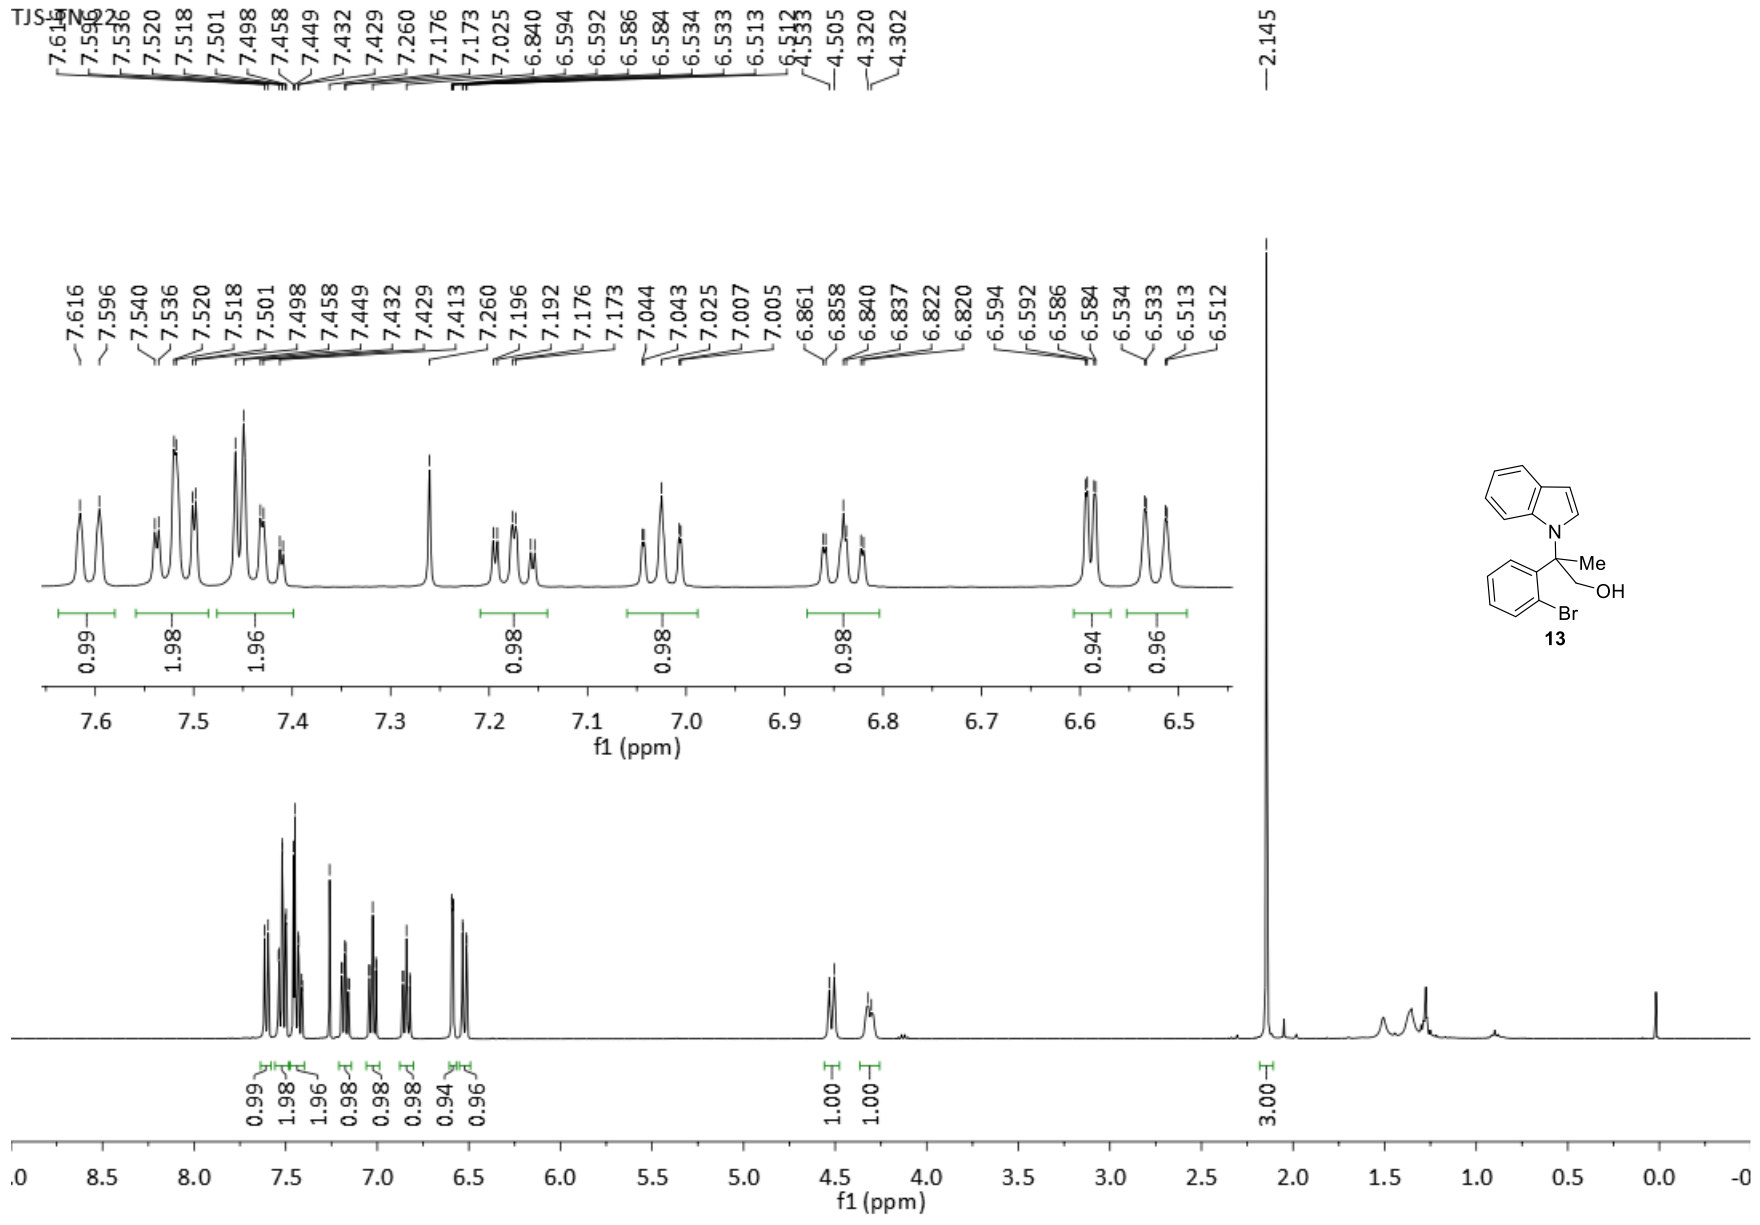

TJS-TN-22

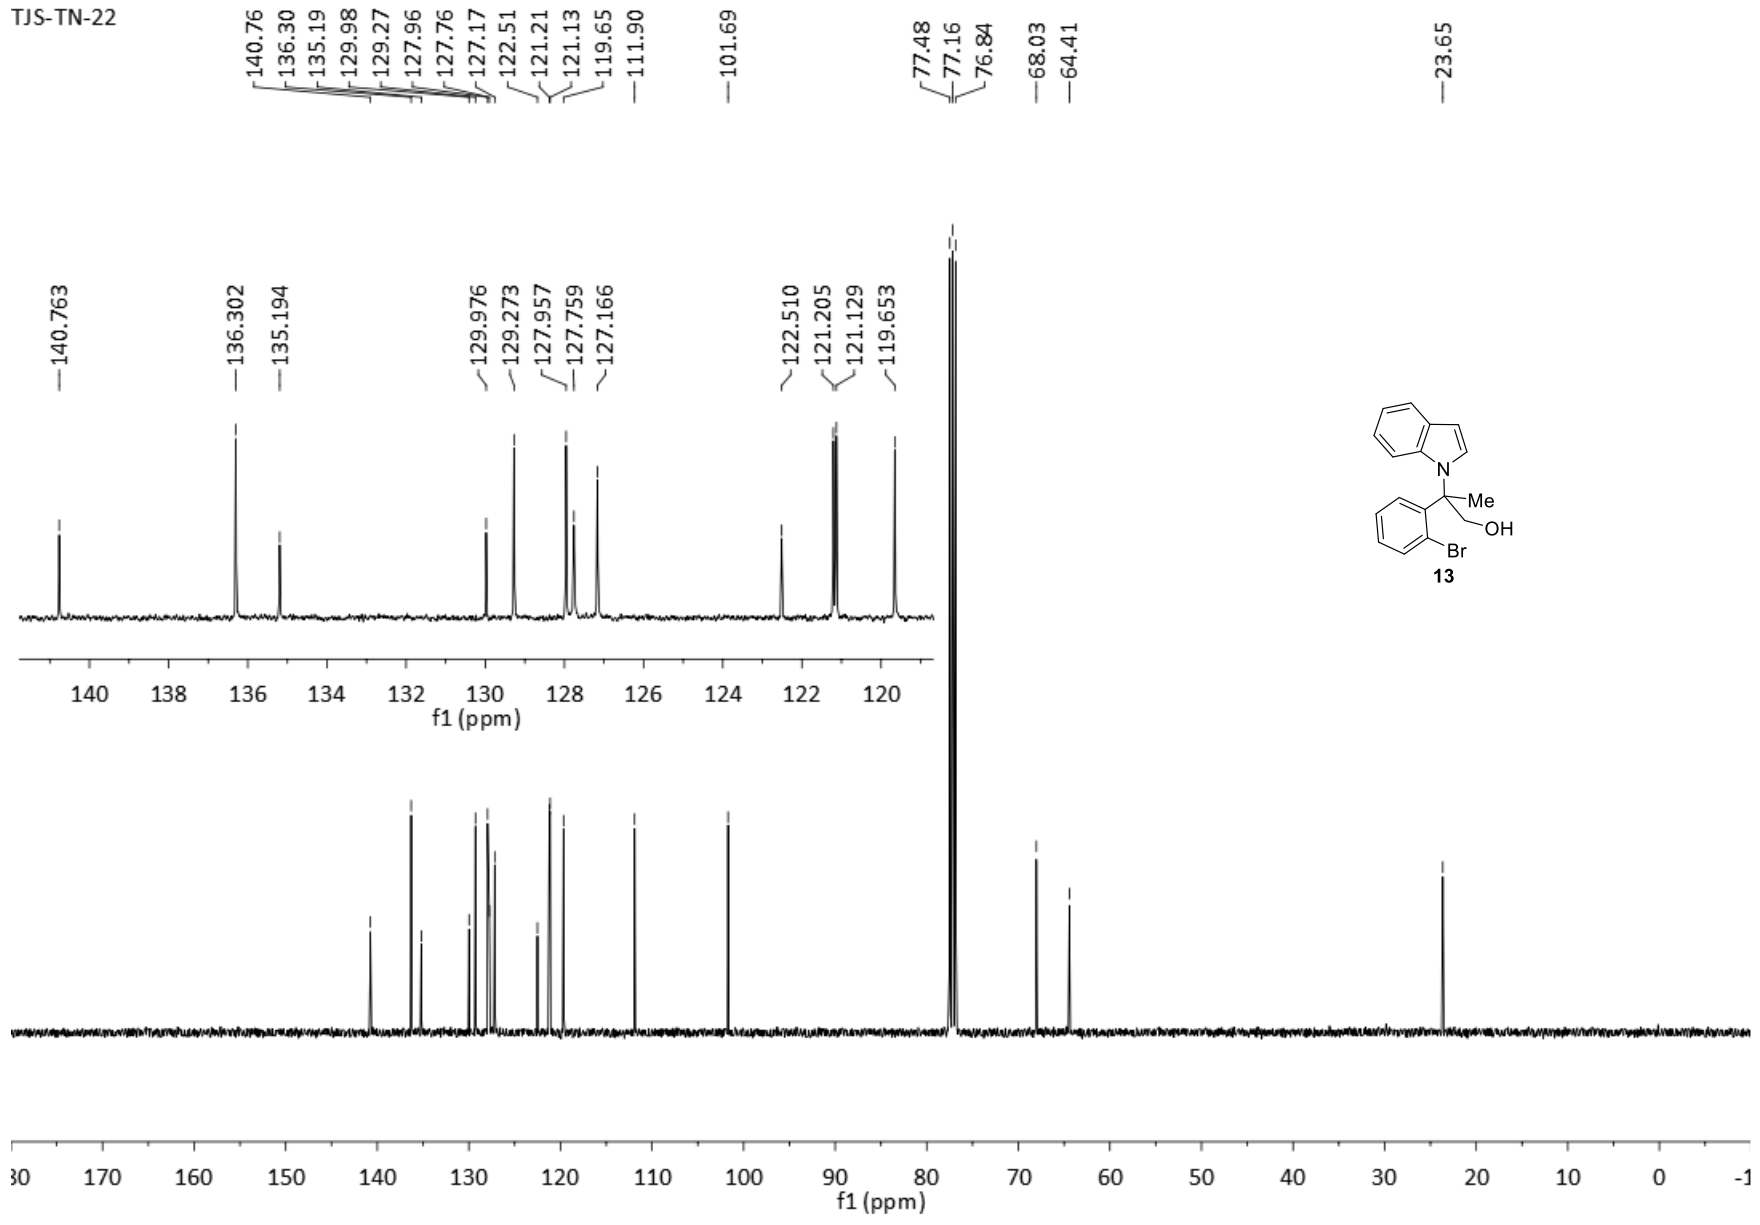



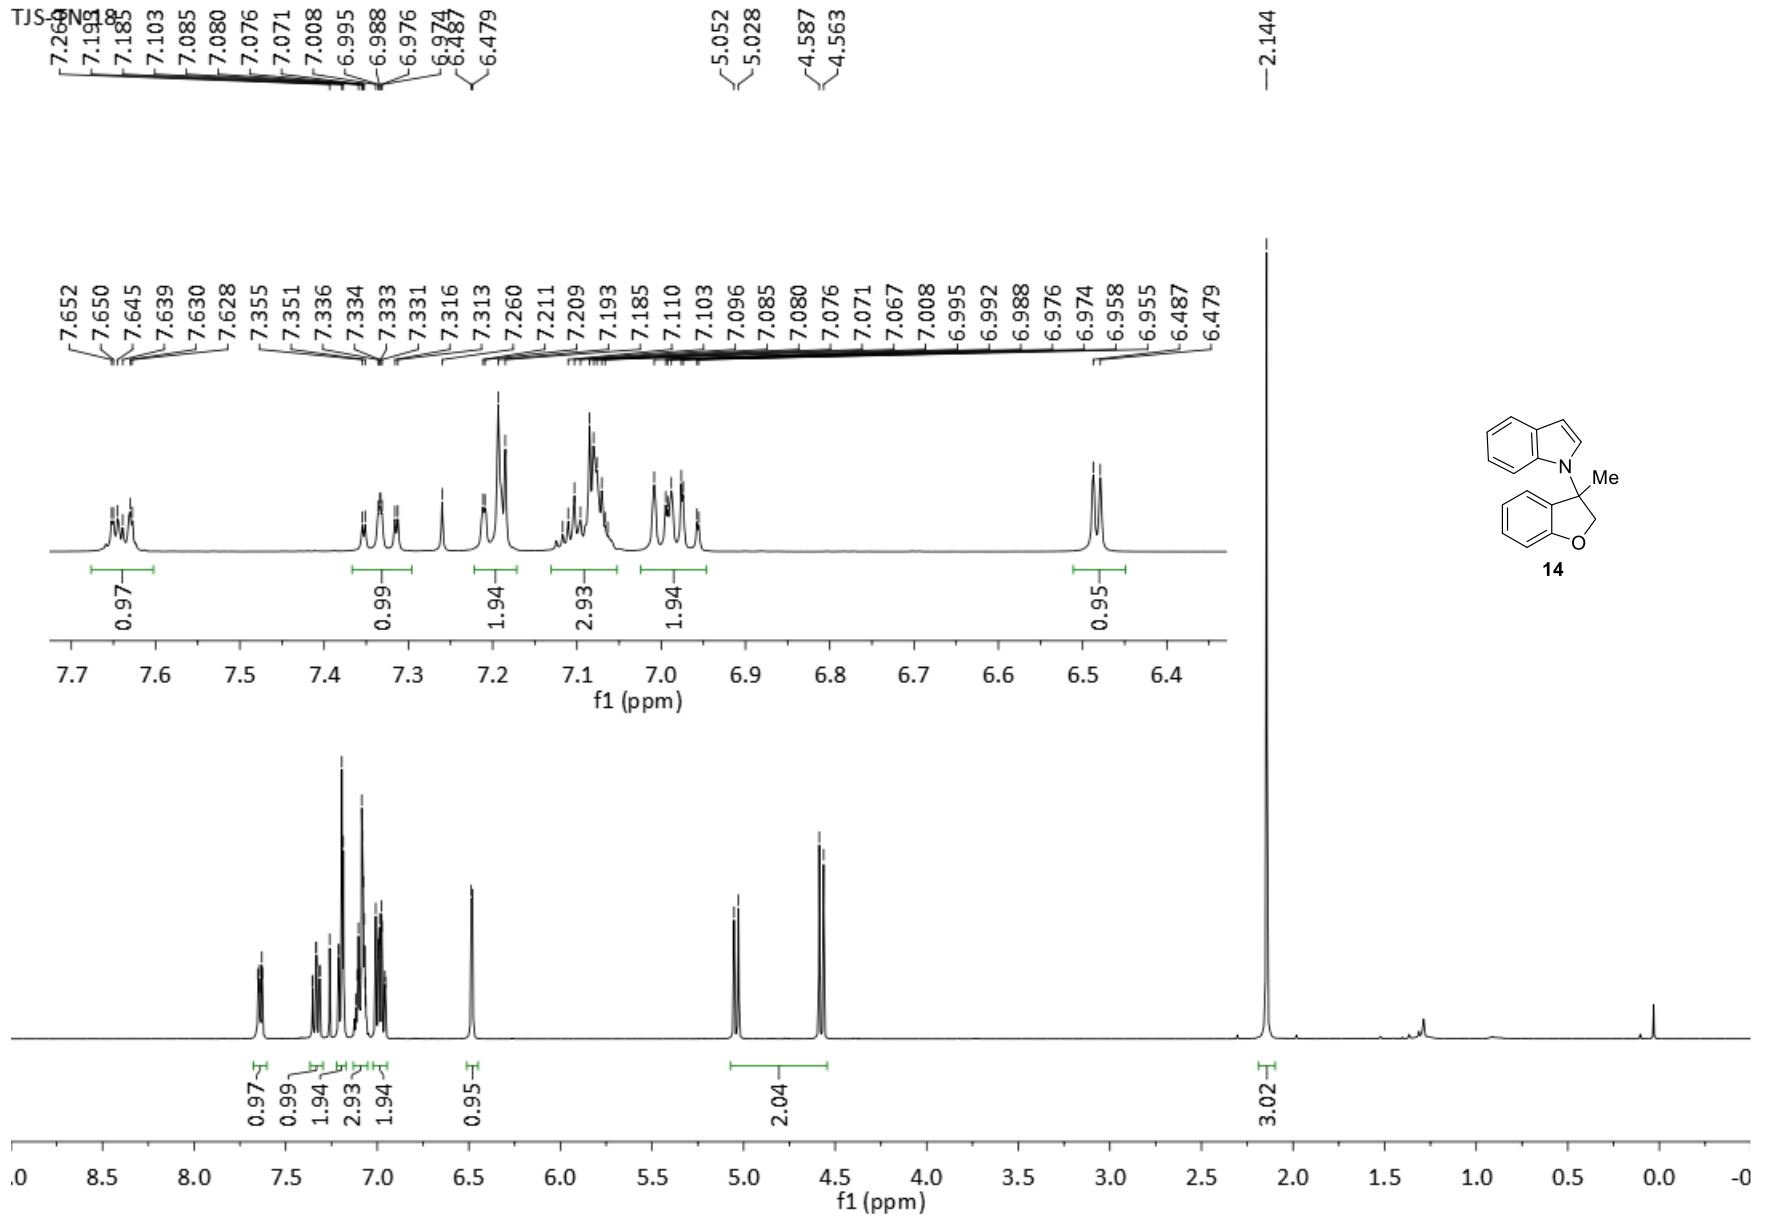

TJS-TN-18

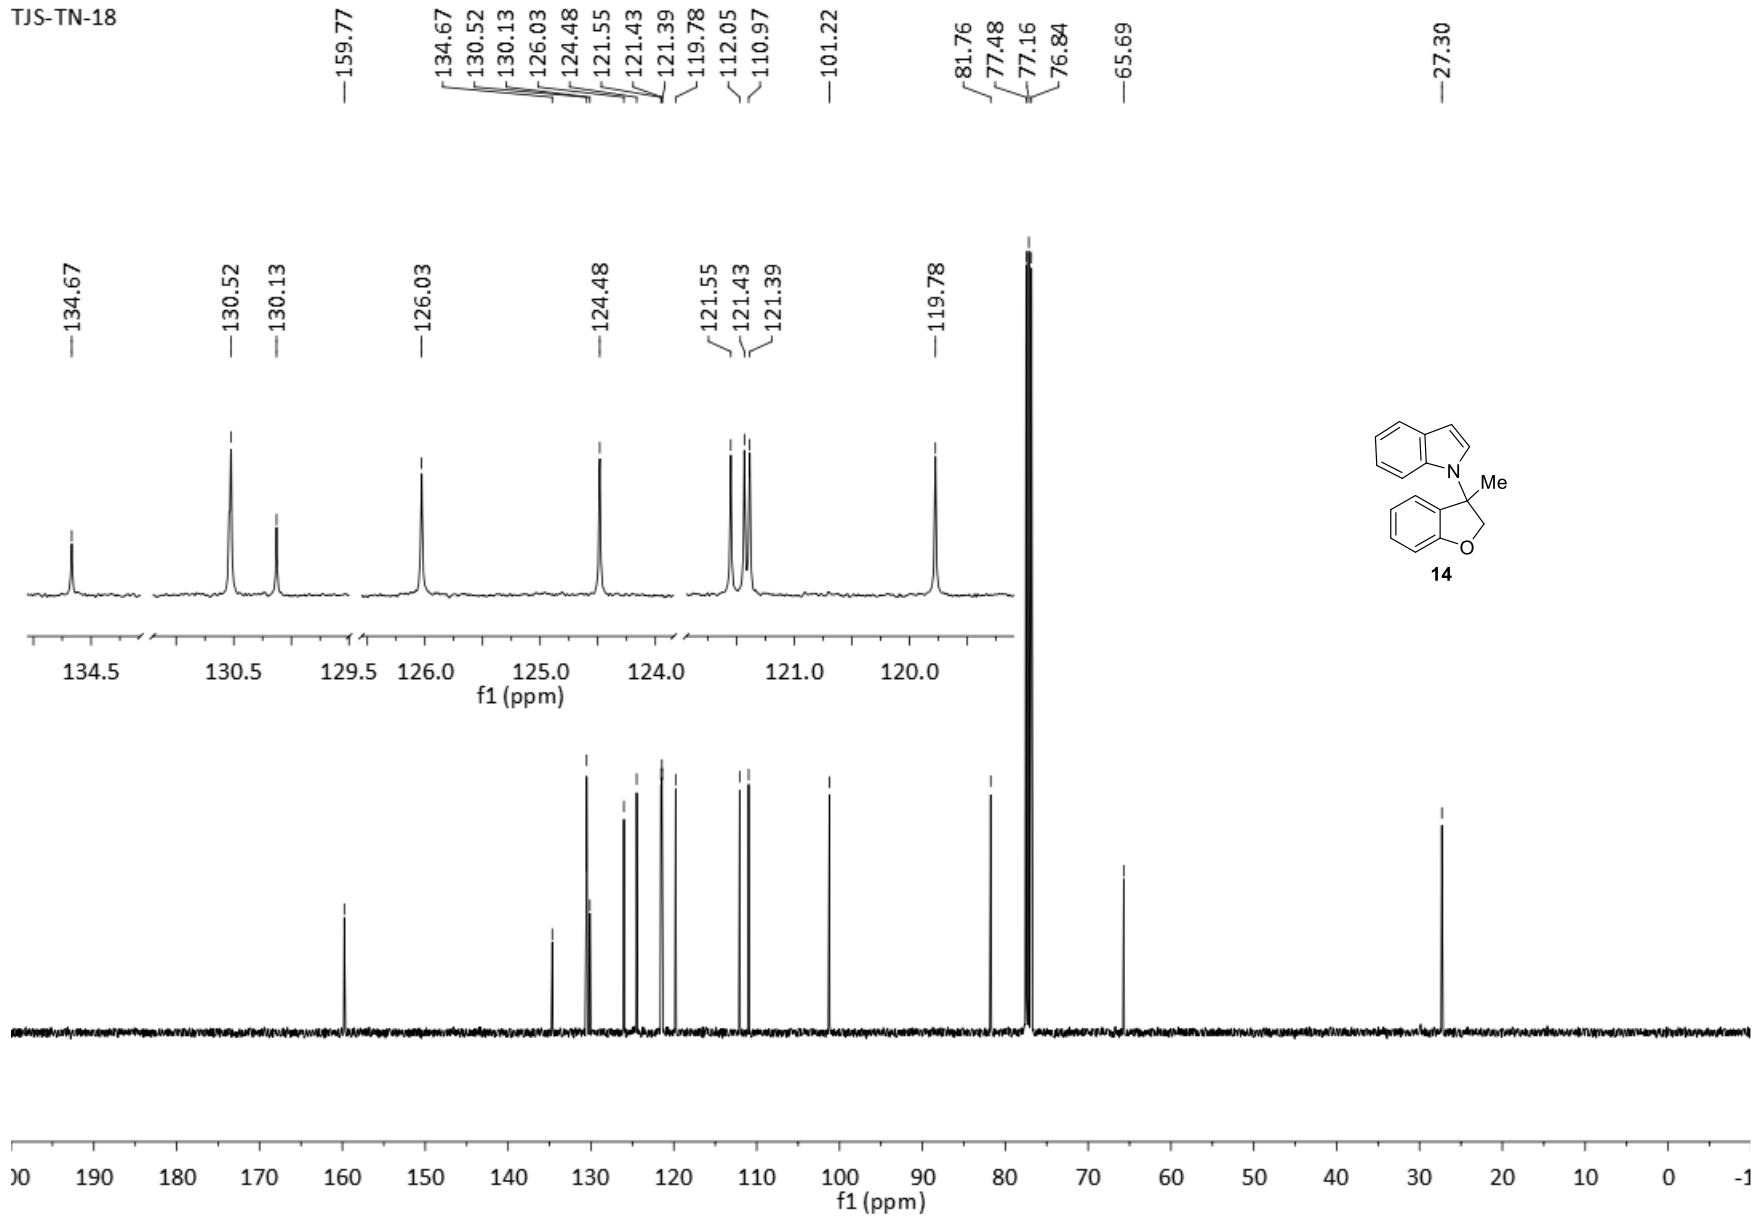



TJS-TN-28

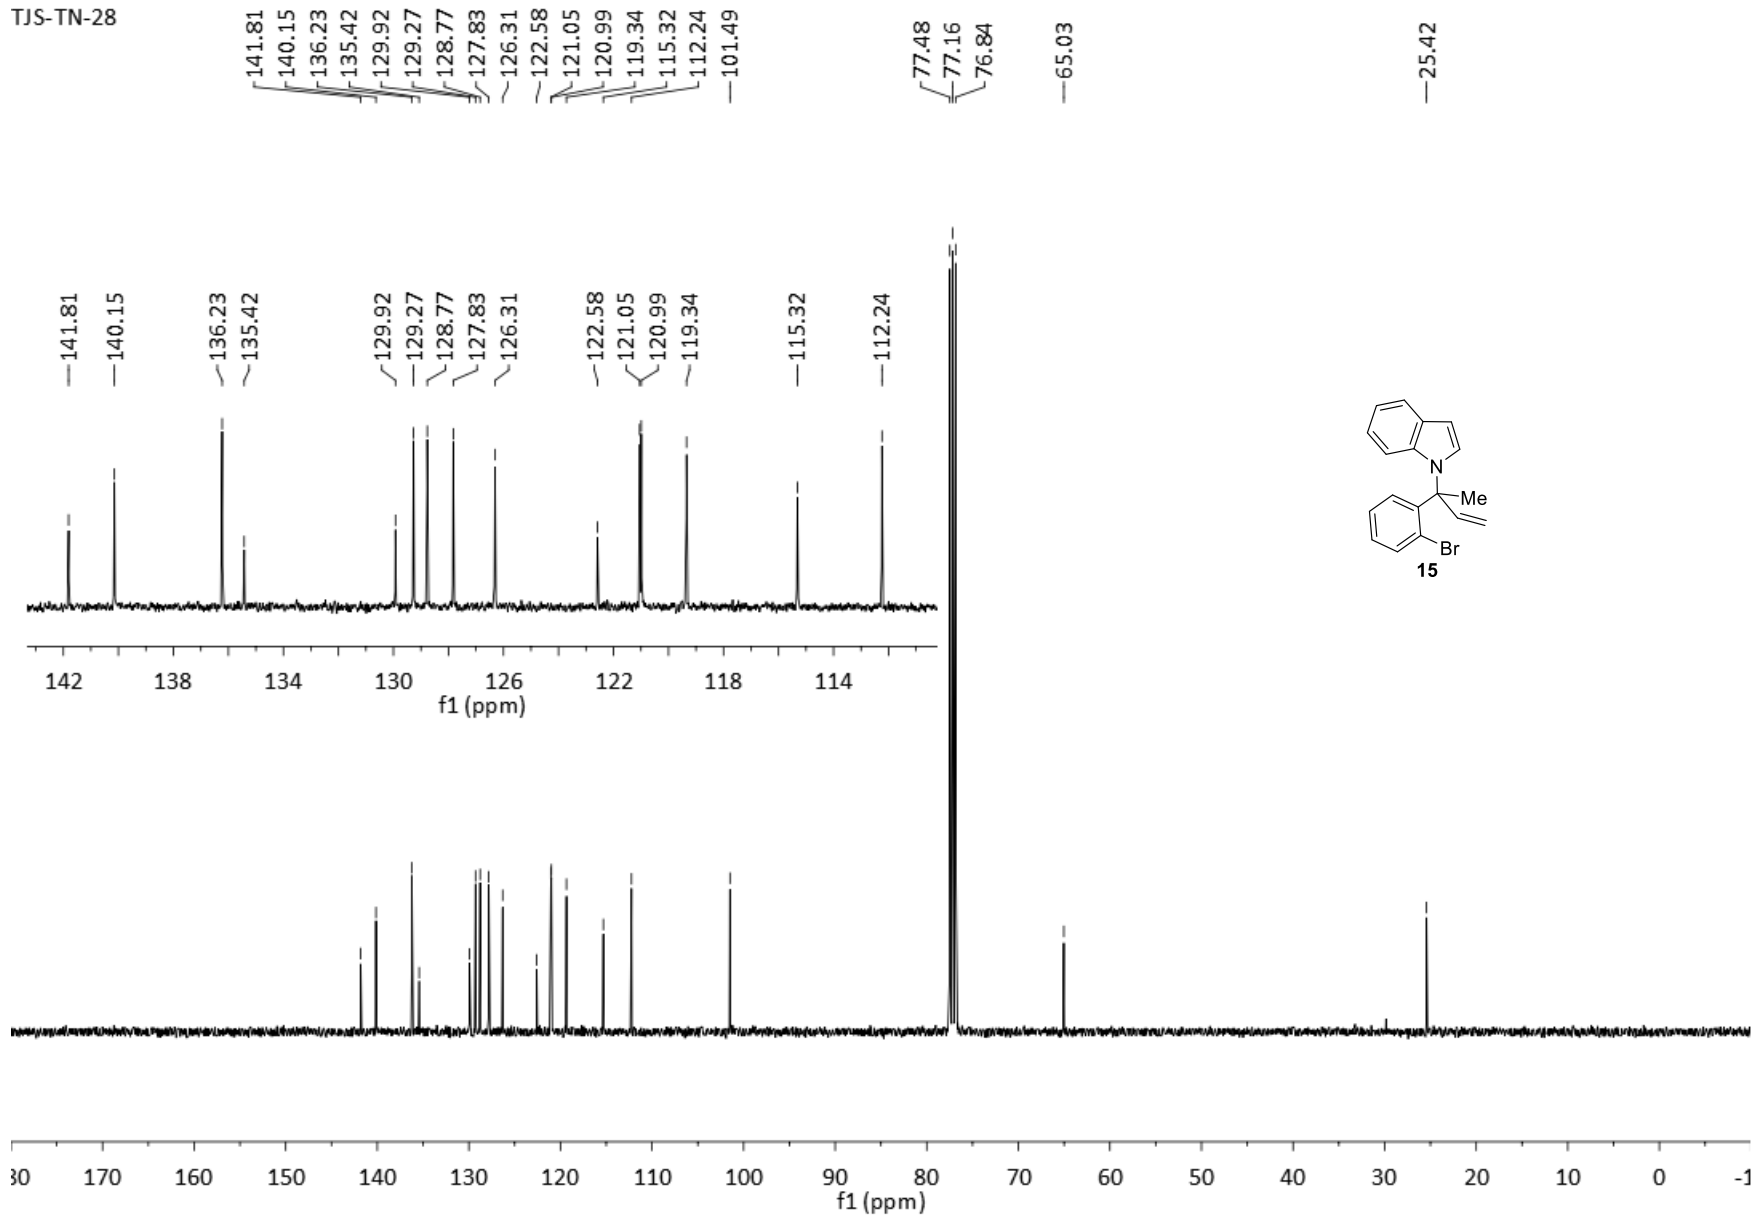

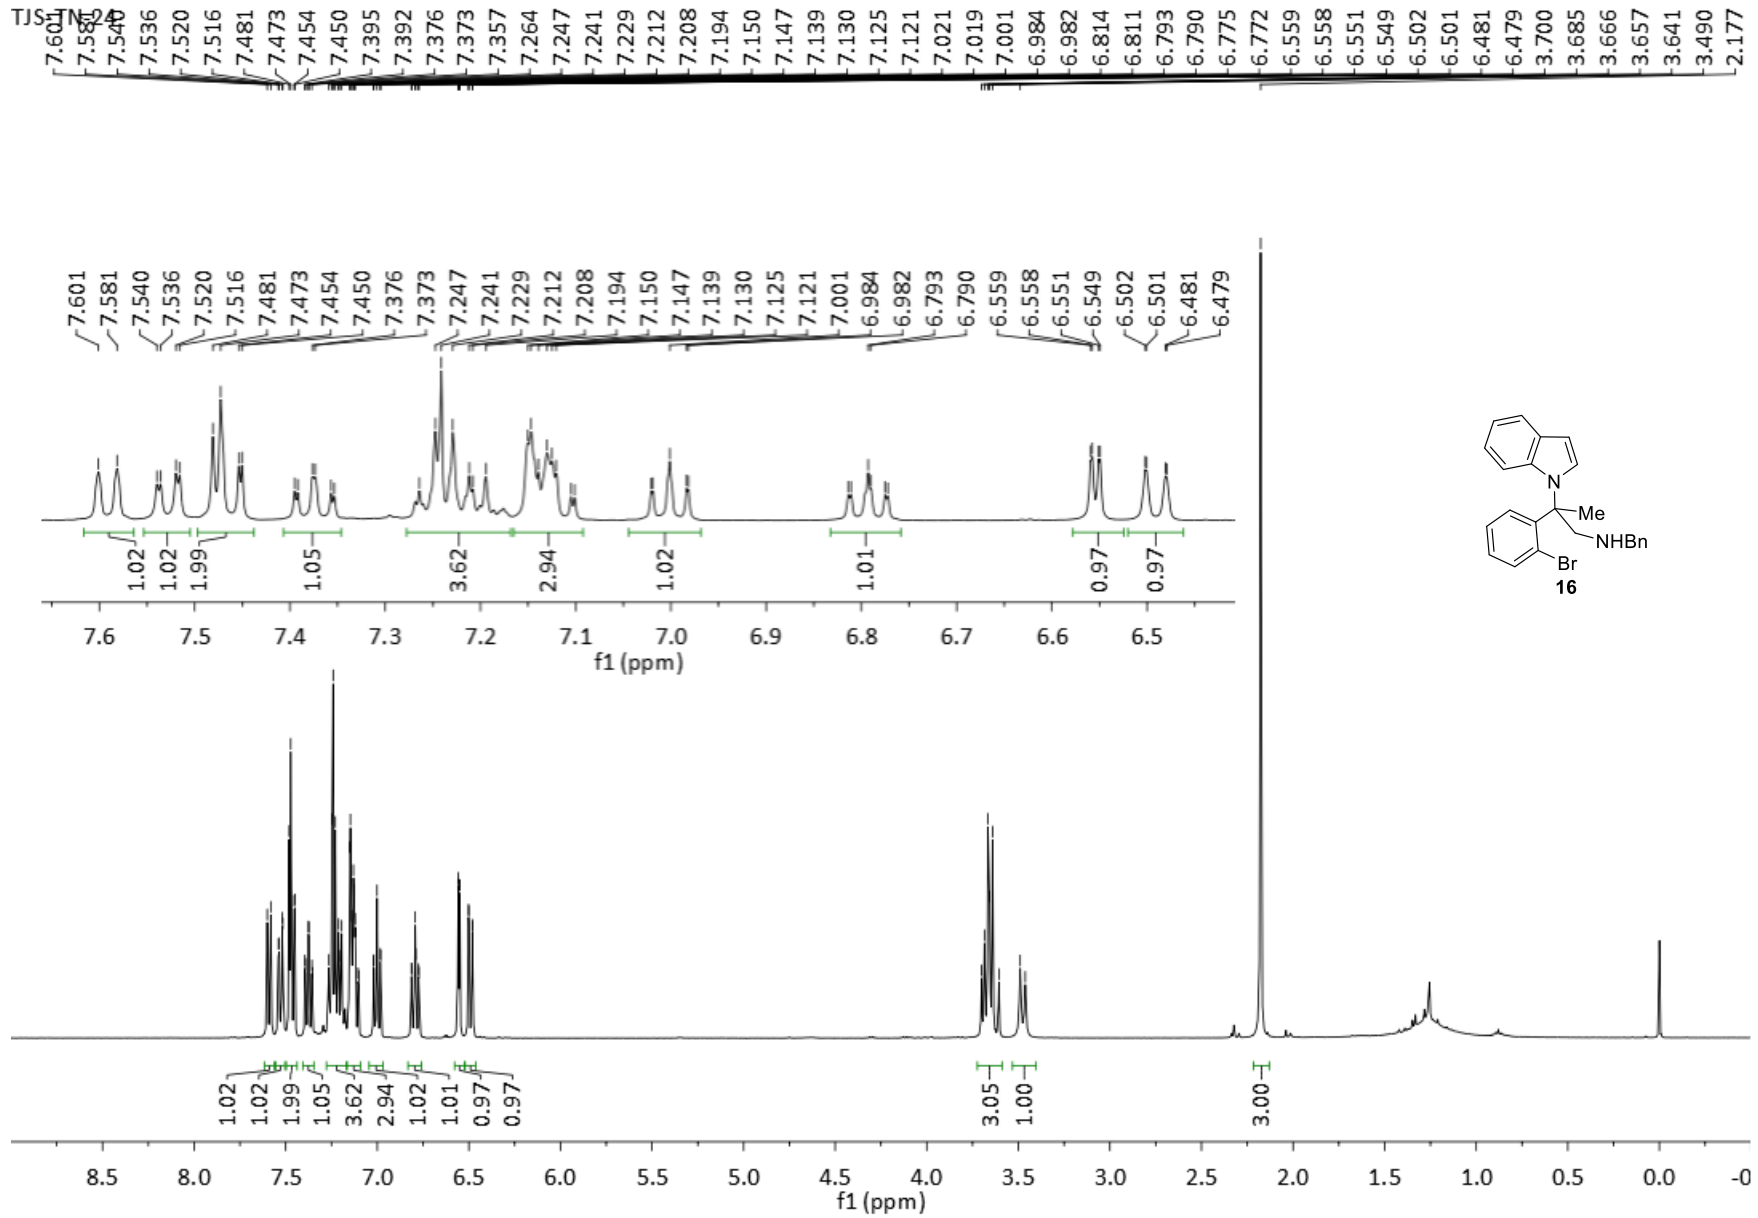

TJS-TN-243

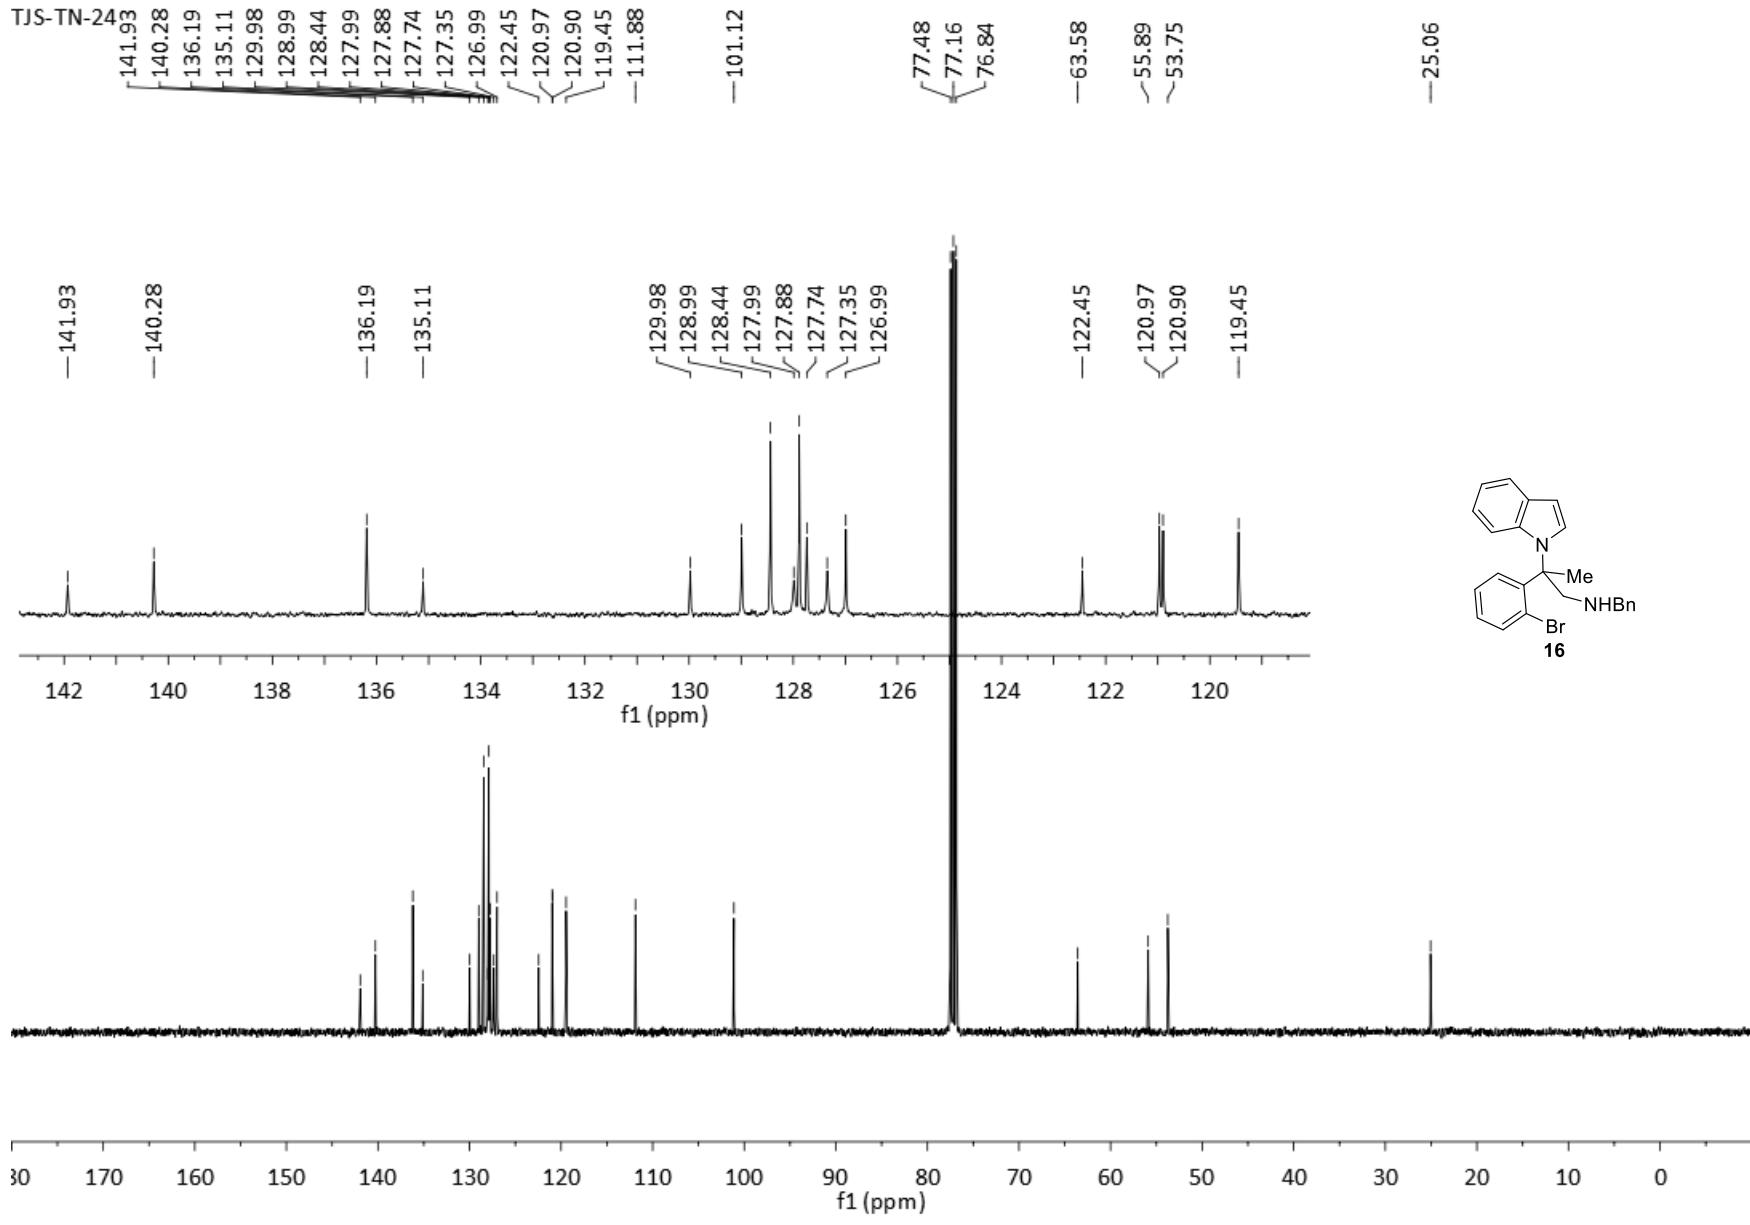

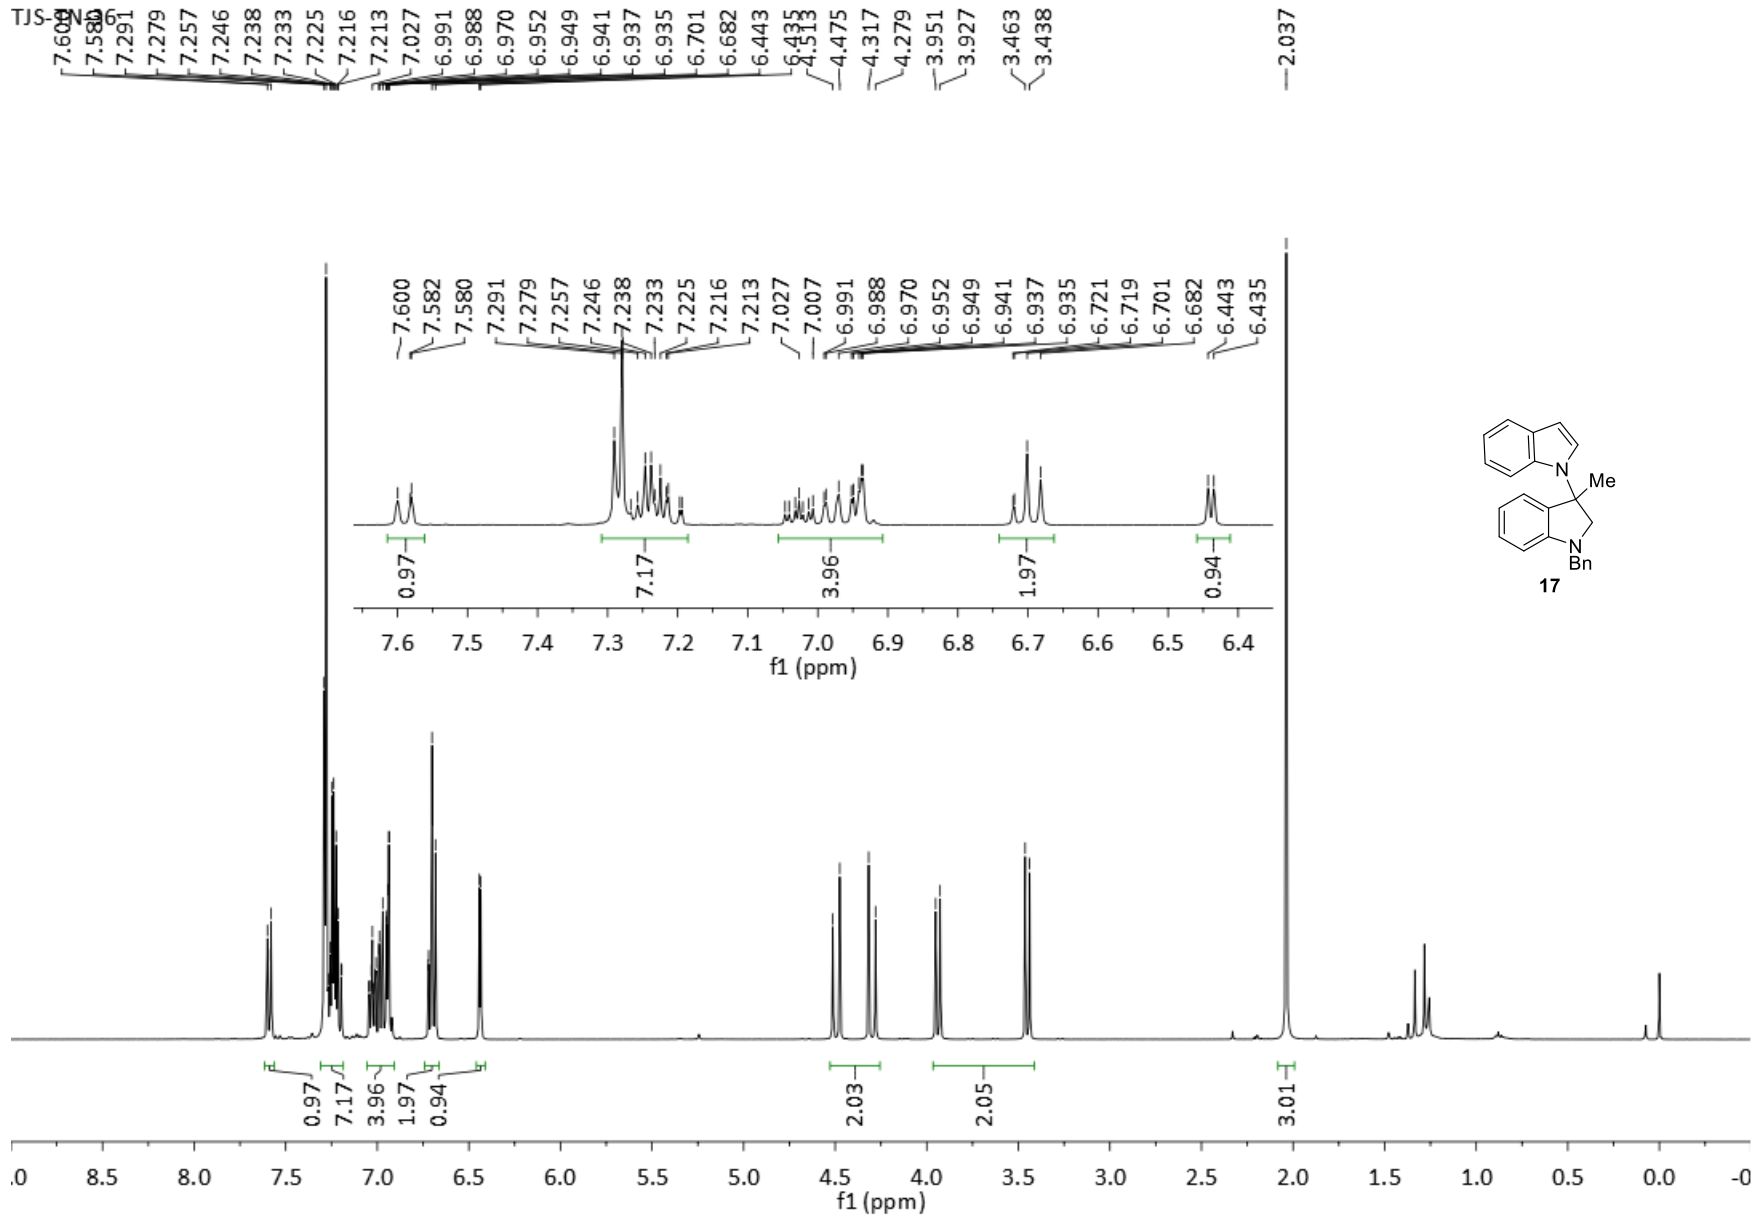

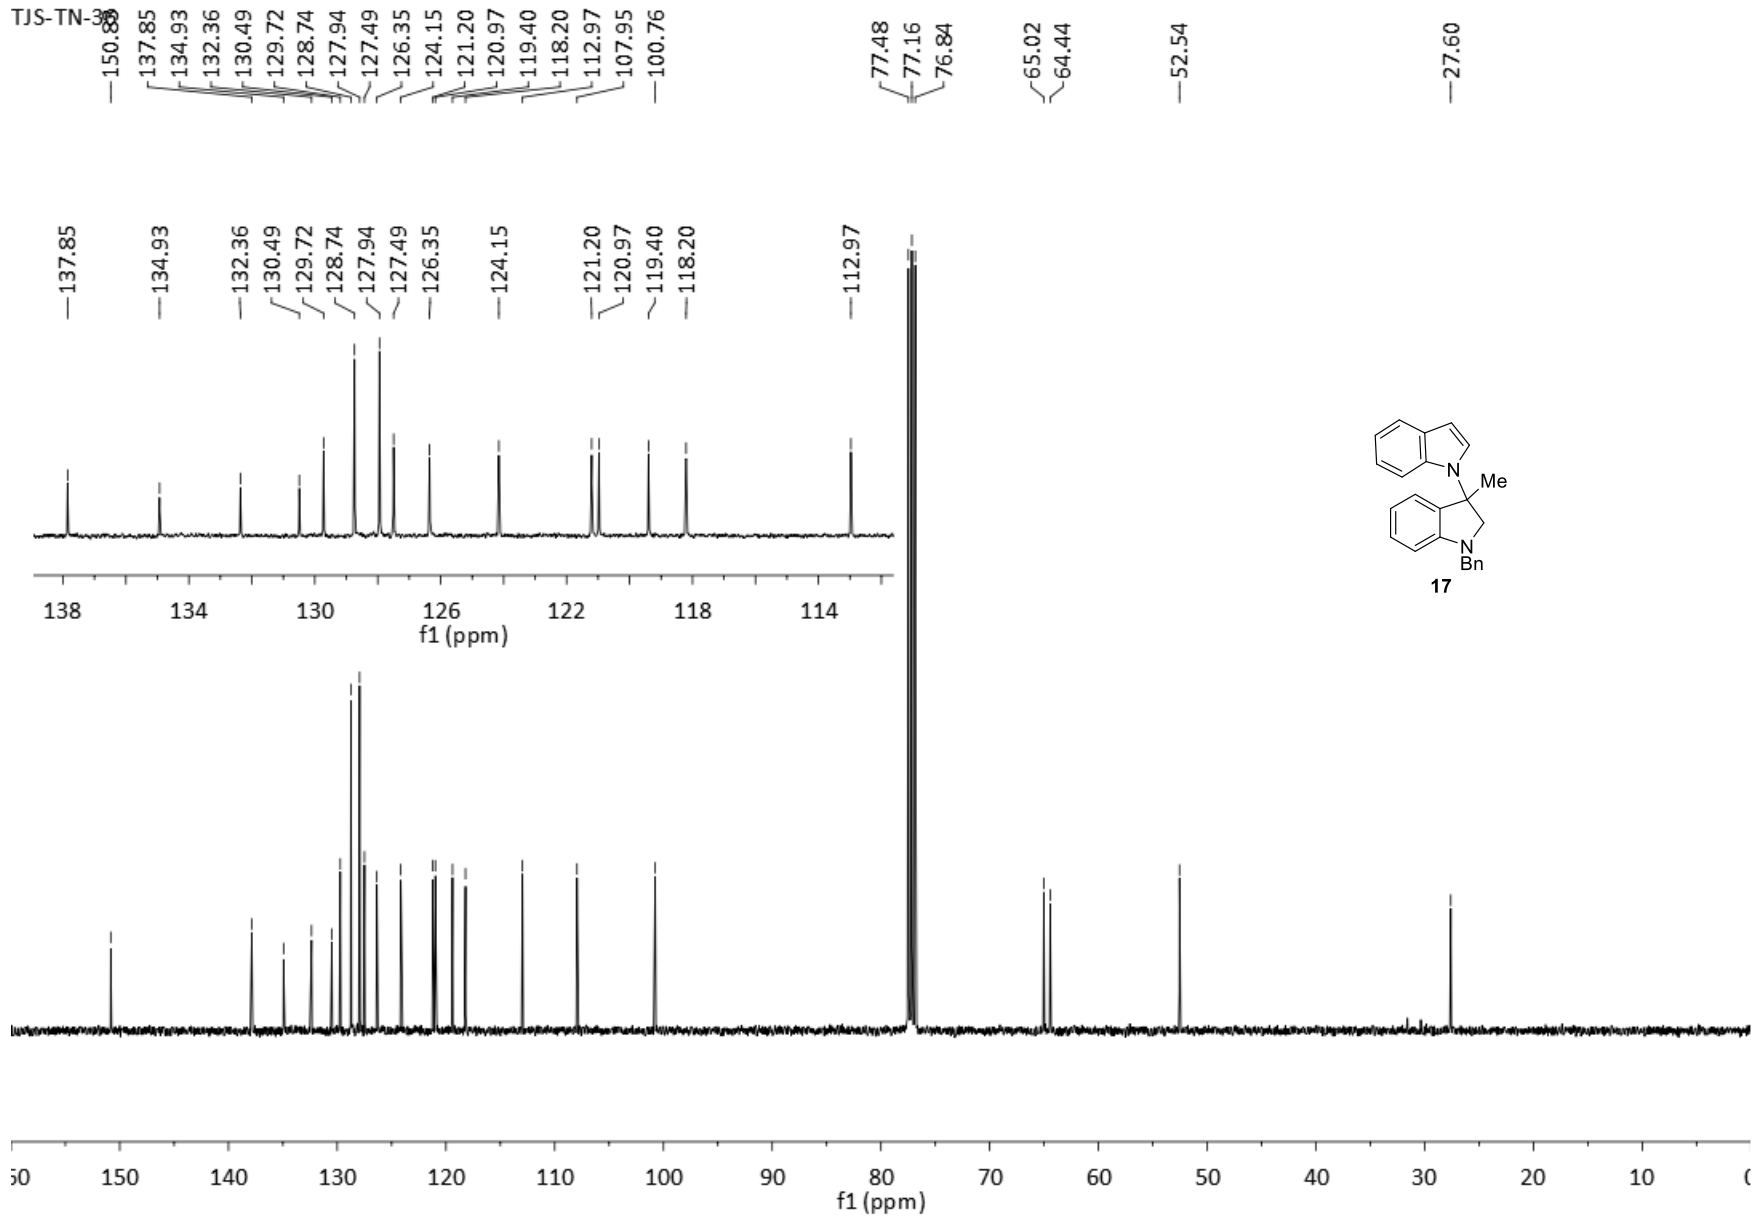

Supplement: d3qo00114h1.pdf [file d3qo00114h1.pdf]
